# Supplementary material for: Reliability of HF/IQA, B3LYP/IQA, and MP2/IQA data in interpreting the nature and strength of interactions
Source: Royal Society of Chemistry journal article supplement (doi:10.1039/c9cp00243j), 2019-01-01
Supplement: c9cp00243j1.pdf [file c9cp00243j1.pdf]

# Reliability of the interacting quantum atom (IQA) data computed in AIMAll from the HF, B3LYP and MP2 wavefunctions

Ignacy Cukrowski<sup>a</sup>

*<sup>a</sup>Department of Chemistry, Faculty of Natural and Agricultural Sciences, University of Pretoria,  
Lynnwood Road, Pretoria, 0002 South Africa*

<sup>a</sup> E-mail: ignacy.cukrowski@up.ac.za

## Supplementary Information

| <b>TABLE OF CONTENT</b>                                                                                                                                                                                                                                                                                               | <b>Page</b> |
|-----------------------------------------------------------------------------------------------------------------------------------------------------------------------------------------------------------------------------------------------------------------------------------------------------------------------|-------------|
| <b>Scheme S1.</b> Protocol used to assess reliability of IQA, IQF and FAMSEC descriptors.                                                                                                                                                                                                                             | S4          |
| Coordinates of optimised structures.                                                                                                                                                                                                                                                                                  | S5          |
| <b>Tables S1–S11.</b> Relative to the CCSD/BBC1 level, analysis of additive atomic energies computed for the <b>Lin</b> , <b>LEC</b> and <b>Ecl</b> conformers of glycol at all levels of theory.                                                                                                                     | S10         |
| <b>Figures S1–S3.</b>                                                                                                                                                                                                                                                                                                 | S16         |
| <b>Figure S4.</b> Relative errors in the total self-molecular and total interaction energies obtained for the linear and eclipsed conformers.                                                                                                                                                                         | S17         |
| <b>Table S12.</b> Full set of data obtained for the <i>expected</i> and <i>computed</i> $E_{\text{self}}^{\text{Tot}}$ and $E_{\text{int}}^{\text{Tot}}$ values.                                                                                                                                                      | S18         |
| <b>Tables S13–S24.</b> Relative to the CCSD/BBC1 data, analysis of self-atomic energies computed for the <b>Lin</b> , <b>LEC</b> and <b>Ecl</b> conformers of glycol at all levels of theory.                                                                                                                         | S19         |
| <b>Figure S5.</b> Relative errors in computed self-atomic energies obtained for the eclipsed and linear conformers of glycol.                                                                                                                                                                                         | S26         |
| <b>Tables S25–S30.</b> Full set of $E_{\text{int}}^{\text{A,B}}$ and its components, $V_{\text{cl}}^{\text{A,B}}$ and $V_{\text{XC}}^{\text{A,B}}$ , in the three conformers of glycol and changes in these energies on <b>Lin</b> → <b>LEC</b> and <b>Lin</b> → <b>Ecl</b> computed at the CCSD/BBC1 level.          | S27         |
| <b>Tables S31–S66.</b> Full analyses of relative errors ( $\Delta_{\text{int}}^{\text{A,B}}$ , $\Delta_{\text{cl}}^{\text{A,B}}$ and $\Delta_{\text{XC}}^{\text{A,B}}$ ) computed for covalently bonded atoms in three conformers of glycol and O4...H6 ( <b>LEC</b> ) and O3...O4 ( <b>Ecl</b> ) interactions.       | S39         |
| <b>Figures S6–S8.</b> Relative errors in the diatomic interaction energy and its components obtained for the <b>LEC</b> , <b>Lin</b> and <b>Ecl</b> conformers of glycol at all levels of theory.                                                                                                                     | S57         |
| <b>Table S67–S69.</b> Combined analysis of relative errors, $\Delta_{\text{int}}^{\text{A,B}}$ , $\Delta_{\text{cl}}^{\text{A,B}}$ and $\Delta_{\text{XC}}^{\text{A,B}}$ , in the computed diatomic interaction energy and its components obtained for C–C, C–O, C–H, and O–H covalent bonds in conformers of glycol. | S59         |
| <b>Table S70.</b> Comparative analysis (for all conformers) of computed/expected interaction energy and its components computed for the O4...H6 and O3...O4 intramolecular interactions at all levels of theory.                                                                                                      | S68         |
| <b>Tables S71–S79.</b> Using the CCSD/BBC1 data as a reference, analysis of relative errors in $E_{\text{int}}^{\text{A,B}}$ and its components computed at HF for distant C,H, O,H and H,H atom-pairs in all conformers of glycol.                                                                                   | S69         |
| <b>Tables S80–S88.</b> Using the CCSD/BBC1 data as a reference, analysis of relative errors in $E_{\text{int}}^{\text{A,B}}$ and its components computed at B3LYP for distant C,H, O,H and H,H atom-pairs in all conformers of glycol.                                                                                | S81         |

|                                                                                                                                                                                                                                                                                                                                                                                                                         |      |
|-------------------------------------------------------------------------------------------------------------------------------------------------------------------------------------------------------------------------------------------------------------------------------------------------------------------------------------------------------------------------------------------------------------------------|------|
| <b>Tables S89–S97.</b> Using the CCSD/BBC1 data as a reference, analysis of relative errors in $E_{\text{int}}^{\text{A,B}}$ and its components, computed at B3LYP-GD3 for distant C,H, O,H and H,H atom-pairs in all conformers of glycol.                                                                                                                                                                             | S93  |
| <b>Tables S98–S106.</b> Using the CCSD/BBC1 data as a reference, analysis of relative errors in $E_{\text{int}}^{\text{A,B}}$ and its components computed at MP2/Müller for distant C,H, O,H and H,H atom-pairs in all conformers of glycol.                                                                                                                                                                            | S105 |
| <b>Figure S9.</b> Changes in the classical term of diatomic interaction energy on <b>Lin</b> → <b>LEC</b> and <b>Lin</b> → <b>Ecl</b> structural transformations of glycol at all levels of theory.                                                                                                                                                                                                                     | S117 |
| <b>Figure S10.</b> Changes in the XC-term of diatomic interaction energy on <b>Lin</b> → <b>LEC</b> and <b>Lin</b> → <b>Ecl</b> structural transformations of glycol at all levels of theory.                                                                                                                                                                                                                           | S118 |
| <b>Figures S11–12.</b> Errors in $\Delta E_{\text{int}}^{\text{A,B}}$ , $\Delta V_{\text{cl}}^{\text{A,B}}$ and $\Delta V_{\text{XC}}^{\text{A,B}}$ obtained for covalently bonded atoms and the intra-molecular interactions, O4···H6 and O3···O4, on <b>Lin</b> → <b>LEC</b> and <b>Lin</b> → <b>Ecl</b> .                                                                                                            | S119 |
| <b>Tables S107–S112.</b> Errors and averaged absolute errors in $\Delta E_{\text{int}}^{\text{A,B}}$ , $\Delta V_{\text{cl}}^{\text{A,B}}$ and $\Delta V_{\text{XC}}^{\text{A,B}}$ obtained for the <b>Lin</b> → <b>LEC</b> and <b>Lin</b> → <b>Ecl</b> structural changes at all levels of theory.                                                                                                                     | S120 |
| <b>Figure S13–S18.</b> Pictorial presentation of FAMSEC energy terms $\Delta E_{\text{self}}^{\text{G}}$ , $\Delta E_{\text{int}}^{\text{G}}$ , $E_{\text{attr-loc}}^{\text{G}}$ , $\Delta E_{\text{int}}^{\text{G,H}}$ and $E_{\text{attr-mol}}^{\text{G}}$ computed for selected and meaningful 2-, 3- and 4-atom fragments G on the <b>Lin</b> → <b>LEC</b> and <b>Lin</b> → <b>Ecl</b> structural change of glycol. | S123 |
| <b>Table S113–118.</b> FAMSEC descriptors computed at all levels of theory for selected and meaningful 2-, 3- and 4-atom fragments G on the <b>Lin</b> → <b>Ecl</b> and <b>Lin</b> → <b>Ecl</b> structural changes of glycol.                                                                                                                                                                                           | S127 |
| <b>Table S119.</b> Absolute errors in the FAMSEC energy terms computed for the indicated and meaningful molecular fragments at all levels of theory on the <b>Lin</b> → <b>LEC</b> and <b>Lin</b> → <b>Ecl</b> structural changes of glycol.                                                                                                                                                                            | S138 |

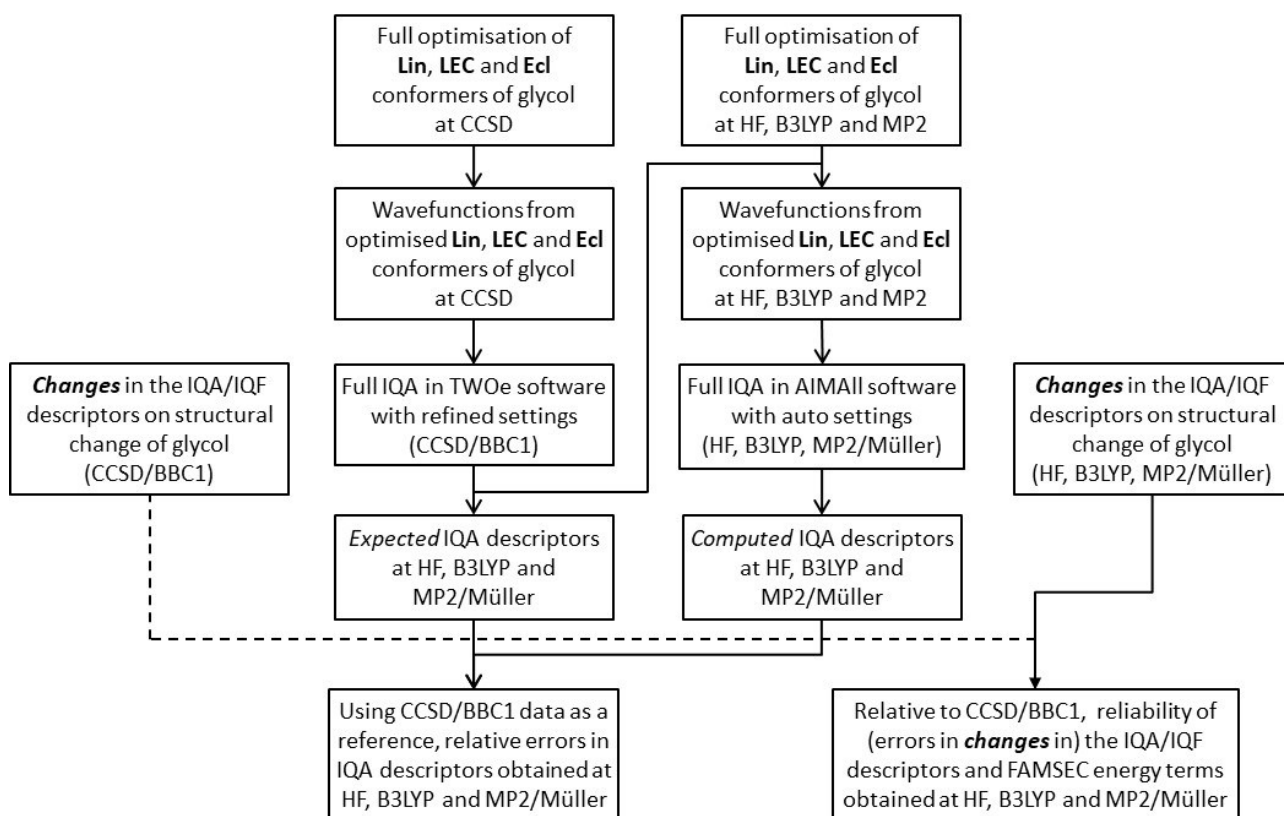

**Scheme S1.** Protocol used to assess, relative to the CCSD/BBC1/TWOe/refined settings level, reliability of IQA descriptors as well as changes (occurring on a structural change of glycol) in the IQA/IQF and FAMSEC energy terms computed from wavefunctions generated at the HF, B3LYP and MP2/Müller levels using AIMAll with default (auto) settings.

## Coordinates of optimised structures

The linear conformer of glycol (**Lin**) optimised at the CCSD level.

| Center Number | Atomic Number | Atomic Type | Coordinates (Angstroms) |           |           |
|---------------|---------------|-------------|-------------------------|-----------|-----------|
|               |               |             | X                       | Y         | Z         |
| 1             | 6             | 0           | 0.553816                | -0.522867 | 0.000000  |
| 2             | 6             | 0           | -0.553816               | 0.522867  | 0.000000  |
| 3             | 8             | 0           | -1.794951               | -0.195586 | 0.000000  |
| 4             | 8             | 0           | 1.794951                | 0.195586  | 0.000000  |
| 5             | 1             | 0           | 2.515495                | -0.443387 | 0.000000  |
| 6             | 1             | 0           | -2.515495               | 0.443387  | 0.000000  |
| 7             | 1             | 0           | 0.457238                | -1.160364 | 0.898339  |
| 8             | 1             | 0           | -0.457238               | 1.160364  | -0.898339 |
| 9             | 1             | 0           | 0.457238                | -1.160364 | -0.898339 |
| 10            | 1             | 0           | -0.457238               | 1.160364  | 0.898339  |

The lowest energy conformer of glycol (**LEC**) optimised at the CCSD level.

| Center Number | Atomic Number | Atomic Type | Coordinates (Angstroms) |           |           |
|---------------|---------------|-------------|-------------------------|-----------|-----------|
|               |               |             | X                       | Y         | Z         |
| 1             | 6             | 0           | 0.684229                | 0.597927  | -0.277310 |
| 2             | 6             | 0           | -0.731587               | 0.569266  | 0.281262  |
| 3             | 8             | 0           | -1.457381               | -0.566444 | -0.189348 |
| 4             | 8             | 0           | 1.334773                | -0.588133 | 0.212492  |
| 5             | 1             | 0           | 2.170009                | -0.700676 | -0.253619 |
| 6             | 1             | 0           | -0.909942               | -1.338630 | 0.005819  |
| 7             | 1             | 0           | 0.648667                | 0.595331  | -1.382320 |
| 8             | 1             | 0           | -1.284734               | 1.461493  | -0.054744 |
| 9             | 1             | 0           | 1.209453                | 1.508013  | 0.070908  |
| 10            | 1             | 0           | -0.687386               | 0.578554  | 1.387760  |

The eclipsed conformer of glycol (**Ecl**) optimised at the CCSD level.

| Center Number | Atomic Number | Atomic Type | Coordinates (Angstroms) |           |           |
|---------------|---------------|-------------|-------------------------|-----------|-----------|
|               |               |             | X                       | Y         | Z         |
| 1             | 6             | 0           | 0.000000                | 0.777323  | 0.643676  |
| 2             | 6             | 0           | 0.000000                | -0.777323 | 0.643676  |
| 3             | 8             | 0           | 0.000000                | -1.269736 | -0.698118 |
| 4             | 8             | 0           | 0.000000                | 1.269736  | -0.698118 |
| 5             | 1             | 0           | 0.000000                | 2.232281  | -0.647206 |
| 6             | 1             | 0           | 0.000000                | -2.232281 | -0.647206 |
| 7             | 1             | 0           | -0.894053               | 1.140748  | 1.185046  |
| 8             | 1             | 0           | -0.894053               | -1.140748 | 1.185046  |
| 9             | 1             | 0           | 0.894053                | 1.140748  | 1.185046  |
| 10            | 1             | 0           | 0.894053                | -1.140748 | 1.185046  |

The linear conformer of glycol (**Lin**) optimised at the HF level.

| Center Number | Atomic Number | Atomic Type | Coordinates (Angstroms) |           |           |
|---------------|---------------|-------------|-------------------------|-----------|-----------|
|               |               |             | X                       | Y         | Z         |
| 1             | 6             | 0           | 0.431932                | 0.621253  | 0.000000  |
| 2             | 6             | 0           | -0.431932               | -0.621253 | 0.000000  |
| 3             | 8             | 0           | 0.431932                | -1.732249 | 0.000000  |
| 4             | 8             | 0           | -0.431932               | 1.732249  | 0.000000  |
| 5             | 1             | 0           | 0.066566                | 2.530922  | 0.000000  |
| 6             | 1             | 0           | -0.066566               | -2.530922 | 0.000000  |
| 7             | 1             | 0           | 1.071225                | 0.618244  | 0.885281  |
| 8             | 1             | 0           | -1.071225               | -0.618244 | -0.885281 |
| 9             | 1             | 0           | 1.071225                | 0.618244  | -0.885281 |
| 10            | 1             | 0           | -1.071225               | -0.618244 | 0.885281  |

The lowest energy conformer of glycol (**LEC**) optimised at the HF level.

| Center Number | Atomic Number | Atomic Type | Coordinates (Angstroms) |           |           |
|---------------|---------------|-------------|-------------------------|-----------|-----------|
|               |               |             | X                       | Y         | Z         |
| 1             | 6             | 0           | 0.684924                | 0.585216  | -0.267024 |
| 2             | 6             | 0           | -0.727497               | 0.558038  | 0.273948  |
| 3             | 8             | 0           | -1.449579               | -0.549228 | -0.191731 |
| 4             | 8             | 0           | 1.342241                | -0.570774 | 0.205606  |
| 5             | 1             | 0           | 2.185772                | -0.662124 | -0.202803 |
| 6             | 1             | 0           | -0.968041               | -1.333443 | 0.019024  |
| 7             | 1             | 0           | 0.660021                | 0.592239  | -1.358791 |
| 8             | 1             | 0           | -1.260081               | 1.447511  | -0.058407 |
| 9             | 1             | 0           | 1.191965                | 1.488910  | 0.081708  |
| 10            | 1             | 0           | -0.695493               | 0.567394  | 1.366729  |

The eclipsed conformer of glycol (**Ecl**) optimised at the HF level.

| Center Number | Atomic Number | Atomic Type | Coordinates (Angstroms) |           |           |
|---------------|---------------|-------------|-------------------------|-----------|-----------|
|               |               |             | X                       | Y         | Z         |
| 1             | 6             | 0           | 0.000000                | 0.772347  | 0.627211  |
| 2             | 6             | 0           | 0.000000                | -0.772347 | 0.627211  |
| 3             | 8             | 0           | 0.000000                | -1.274898 | -0.680951 |
| 4             | 8             | 0           | 0.000000                | 1.274898  | -0.680951 |
| 5             | 1             | 0           | 0.000000                | 2.216245  | -0.649319 |
| 6             | 1             | 0           | 0.000000                | -2.216245 | -0.649319 |
| 7             | 1             | 0           | -0.881148               | 1.128172  | 1.166831  |
| 8             | 1             | 0           | -0.881148               | -1.128172 | 1.166831  |
| 9             | 1             | 0           | 0.881148                | 1.128172  | 1.166831  |
| 10            | 1             | 0           | 0.881148                | -1.128172 | 1.166831  |

The linear conformer of glycol (**Lin**) optimised at the B3LYP level.

| Center Number | Atomic Number | Atomic Type | Coordinates (Angstroms) |           |           |
|---------------|---------------|-------------|-------------------------|-----------|-----------|
|               |               |             | X                       | Y         | Z         |
| 1             | 6             | 0           | 0.553540                | -0.520315 | 0.000000  |
| 2             | 6             | 0           | -0.553540               | 0.520315  | 0.000000  |
| 3             | 8             | 0           | -1.793898               | -0.191688 | 0.000000  |
| 4             | 8             | 0           | 1.793898                | 0.191688  | 0.000000  |
| 5             | 1             | 0           | 2.518232                | -0.443054 | 0.000000  |
| 6             | 1             | 0           | -2.518232               | 0.443054  | 0.000000  |
| 7             | 1             | 0           | 0.457620                | -1.157542 | 0.894533  |
| 8             | 1             | 0           | -0.457620               | 1.157542  | -0.894533 |
| 9             | 1             | 0           | 0.457620                | -1.157542 | -0.894533 |
| 10            | 1             | 0           | -0.457620               | 1.157542  | 0.894533  |

The lowest energy conformer of glycol (**LEC**) optimised at the B3LYP level.

| Center Number | Atomic Number | Atomic Type | Coordinates (Angstroms) |           |           |
|---------------|---------------|-------------|-------------------------|-----------|-----------|
|               |               |             | X                       | Y         | Z         |
| 1             | 6             | 0           | 0.682927                | 0.594582  | -0.277391 |
| 2             | 6             | 0           | -0.728424               | 0.566412  | 0.279837  |
| 3             | 8             | 0           | -1.464236               | -0.559924 | -0.185335 |
| 4             | 8             | 0           | 1.342506                | -0.584376 | 0.207209  |
| 5             | 1             | 0           | 2.184856                | -0.690772 | -0.247737 |
| 6             | 1             | 0           | -0.931749               | -1.344116 | 0.004378  |
| 7             | 1             | 0           | 0.648809                | 0.594188  | -1.378992 |
| 8             | 1             | 0           | -1.275739               | 1.458550  | -0.052956 |
| 9             | 1             | 0           | 1.201923                | 1.505110  | 0.068908  |
| 10            | 1             | 0           | -0.684673               | 0.577147  | 1.383179  |

The eclipsed conformer of glycol (**Ecl**) optimised at the B3LYP level.

| Center Number | Atomic Number | Atomic Type | Coordinates (Angstroms) |           |           |
|---------------|---------------|-------------|-------------------------|-----------|-----------|
|               |               |             | X                       | Y         | Z         |
| 1             | 6             | 0           | 0.000000                | 0.775863  | 0.641928  |
| 2             | 6             | 0           | 0.000000                | -0.775863 | 0.641928  |
| 3             | 8             | 0           | 0.000000                | -1.274025 | -0.692589 |
| 4             | 8             | 0           | 0.000000                | 1.274025  | -0.692589 |
| 5             | 1             | 0           | 0.000000                | 2.236775  | -0.648827 |
| 6             | 1             | 0           | 0.000000                | -2.236775 | -0.648827 |
| 7             | 1             | 0           | -0.890377               | 1.137132  | 1.183966  |
| 8             | 1             | 0           | -0.890377               | -1.137132 | 1.183966  |
| 9             | 1             | 0           | 0.890377                | 1.137132  | 1.183966  |
| 10            | 1             | 0           | 0.890377                | -1.137132 | 1.183966  |

The linear conformer of glycol (**Lin**) optimised at the B3LYP-GD3 level.

| Center Number | Atomic Number | Atomic Type | Coordinates (Angstroms) |           |           |
|---------------|---------------|-------------|-------------------------|-----------|-----------|
|               |               |             | X                       | Y         | Z         |
| 1             | 6             | 0           | 0.439441                | 0.619663  | 0.000000  |
| 2             | 6             | 0           | -0.439441               | -0.619663 | 0.000000  |
| 3             | 8             | 0           | 0.439441                | -1.748495 | 0.000000  |
| 4             | 8             | 0           | -0.439441               | 1.748495  | 0.000000  |
| 5             | 1             | 0           | 0.086363                | 2.555370  | 0.000000  |
| 6             | 1             | 0           | -0.086363               | -2.555370 | 0.000000  |
| 7             | 1             | 0           | 1.084270                | 0.609321  | 0.894734  |
| 8             | 1             | 0           | -1.084270               | -0.609321 | -0.894734 |
| 9             | 1             | 0           | 1.084270                | 0.609321  | -0.894734 |
| 10            | 1             | 0           | -1.084270               | -0.609321 | 0.894734  |

The lowest energy conformer of glycol (**LEC**) optimised at the B3LYP-GD3 level.

| Center Number | Atomic Number | Atomic Type | Coordinates (Angstroms) |           |           |
|---------------|---------------|-------------|-------------------------|-----------|-----------|
|               |               |             | X                       | Y         | Z         |
| 1             | 6             | 0           | 0.685310                | 0.598067  | -0.276321 |
| 2             | 6             | 0           | -0.726375               | 0.565952  | 0.281126  |
| 3             | 8             | 0           | -1.460873               | -0.558789 | -0.192539 |
| 4             | 8             | 0           | 1.347720                | -0.577050 | 0.216224  |
| 5             | 1             | 0           | 2.188810                | -0.687388 | -0.239969 |
| 6             | 1             | 0           | -0.930761               | -1.344730 | -0.003485 |
| 7             | 1             | 0           | 0.647256                | 0.591350  | -1.378194 |
| 8             | 1             | 0           | -1.274439               | 1.460093  | -0.045752 |
| 9             | 1             | 0           | 1.200620                | 1.513316  | 0.064273  |
| 10            | 1             | 0           | -0.679868               | 0.569956  | 1.384816  |

The eclipsed conformer of glycol (**Ecl**) optimised at the B3LYP-GD3 level.

| Center Number | Atomic Number | Atomic Type | Coordinates (Angstroms) |           |           |
|---------------|---------------|-------------|-------------------------|-----------|-----------|
|               |               |             | X                       | Y         | Z         |
| 1             | 6             | 0           | 0.000000                | 0.776602  | 0.640741  |
| 2             | 6             | 0           | 0.000000                | -0.776602 | 0.640741  |
| 3             | 8             | 0           | 0.000000                | -1.274229 | -0.694928 |
| 4             | 8             | 0           | 0.000000                | 1.274229  | -0.694928 |
| 5             | 1             | 0           | 0.000000                | 2.237025  | -0.653057 |
| 6             | 1             | 0           | 0.000000                | -2.237025 | -0.653057 |
| 7             | 1             | 0           | -0.890554               | 1.137282  | 1.184020  |
| 8             | 1             | 0           | -0.890554               | -1.137282 | 1.184020  |
| 9             | 1             | 0           | 0.890554                | 1.137282  | 1.184020  |
| 10            | 1             | 0           | 0.890554                | -1.137282 | 1.184020  |



The linear conformer of glycol (**Lin**) optimised at the MP2 level.

| Center Number | Atomic Number | Atomic Type | Coordinates (Angstroms) |           |           |
|---------------|---------------|-------------|-------------------------|-----------|-----------|
|               |               |             | X                       | Y         | Z         |
| 1             | 6             | 0           | 0.442789                | 0.616993  | 0.000000  |
| 2             | 6             | 0           | -0.442789               | -0.616993 | 0.000000  |
| 3             | 8             | 0           | 0.442789                | -1.748313 | 0.000000  |
| 4             | 8             | 0           | -0.442789               | 1.748313  | 0.000000  |
| 5             | 1             | 0           | 0.094801                | 2.550529  | 0.000000  |
| 6             | 1             | 0           | -0.094801               | -2.550529 | 0.000000  |
| 7             | 1             | 0           | 1.085147                | 0.607554  | 0.897394  |
| 8             | 1             | 0           | -1.085147               | -0.607554 | -0.897394 |
| 9             | 1             | 0           | 1.085147                | 0.607554  | -0.897394 |
| 10            | 1             | 0           | -1.085147               | -0.607554 | 0.897394  |

The lowest energy conformer of glycol (**LEC**) optimised at the MP2 level.

| Center Number | Atomic Number | Atomic Type | Coordinates (Angstroms) |           |           |
|---------------|---------------|-------------|-------------------------|-----------|-----------|
|               |               |             | X                       | Y         | Z         |
| 1             | 6             | 0           | 0.684080                | 0.607338  | -0.275866 |
| 2             | 6             | 0           | -0.727481               | 0.572436  | 0.280082  |
| 3             | 8             | 0           | -1.446569               | -0.569208 | -0.193396 |
| 4             | 8             | 0           | 1.332231                | -0.581571 | 0.219109  |
| 5             | 1             | 0           | 2.169067                | -0.695310 | -0.249601 |
| 6             | 1             | 0           | -0.881671               | -1.334054 | -0.004482 |
| 7             | 1             | 0           | 0.649949                | 0.602254  | -1.378813 |
| 8             | 1             | 0           | -1.285887               | 1.458594  | -0.056480 |
| 9             | 1             | 0           | 1.207157                | 1.515736  | 0.073672  |
| 10            | 1             | 0           | -0.683507               | 0.580363  | 1.384698  |

The eclipsed conformer of glycol (**Ecl**) optimised at the MP2 level.

| Center Number | Atomic Number | Atomic Type | Coordinates (Angstroms) |           |           |
|---------------|---------------|-------------|-------------------------|-----------|-----------|
|               |               |             | X                       | Y         | Z         |
| 1             | 6             | 0           | 0.000000                | 0.775481  | 0.646945  |
| 2             | 6             | 0           | 0.000000                | -0.775481 | 0.646945  |
| 3             | 8             | 0           | 0.000000                | -1.260277 | -0.700256 |
| 4             | 8             | 0           | 0.000000                | 1.260277  | -0.700256 |
| 5             | 1             | 0           | 0.000000                | 2.225616  | -0.649648 |
| 6             | 1             | 0           | 0.000000                | -2.225616 | -0.649648 |
| 7             | 1             | 0           | -0.892908               | 1.139710  | 1.185014  |
| 8             | 1             | 0           | -0.892908               | -1.139710 | 1.185014  |
| 9             | 1             | 0           | 0.892908                | 1.139710  | 1.185014  |
| 10            | 1             | 0           | 0.892908                | -1.139710 | 1.185014  |

**Table S1.** Relative to the CCSD/BBC1 data, analysis of additive atomic energies computed for the LEC of glycol at the B3LYP level.<sup>a</sup>

| Atom A | CCSD/BBC1                   |                                 | B3LYP                              |                                    |                                    |                                  |
|--------|-----------------------------|---------------------------------|------------------------------------|------------------------------------|------------------------------------|----------------------------------|
|        | $E_{\text{add}}^{\text{A}}$ | $E_{\text{add}}^{\text{A}} / E$ | Comput $E_{\text{add}}^{\text{A}}$ | Expect $E_{\text{add}}^{\text{A}}$ | $\Delta E_{\text{add}}^{\text{A}}$ | $\Delta_{\text{add}}^{\text{A}}$ |
| C1     | -37.94313                   | 0.16518                         | -38.0434                           | -38.0392                           | -62.9                              | -2.6                             |
| C2     | -37.94389                   | 0.16518                         | -38.0435                           | -38.0400                           | -62.5                              | -2.2                             |
| O3     | -75.25949                   | 0.32762                         | -75.4367                           | -75.4501                           | -111.2                             | 8.4                              |
| O4     | -75.27158                   | 0.32768                         | -75.4464                           | -75.4622                           | -109.7                             | 9.9                              |
| H5     | -0.48480                    | 0.00211                         | -0.4867                            | -0.4860                            | -1.2                               | -0.4                             |
| H6     | -0.48892                    | 0.00213                         | -0.4917                            | -0.4902                            | -1.7                               | -1.0                             |
| H7     | -0.58017                    | 0.00253                         | -0.5867                            | -0.5816                            | -4.1                               | -3.2                             |
| H8     | -0.58022                    | 0.00253                         | -0.5859                            | -0.5817                            | -3.5                               | -2.6                             |
| H9     | -0.58095                    | 0.00253                         | -0.5877                            | -0.5824                            | -4.2                               | -3.3                             |
| H10    | -0.57971                    | 0.00252                         | -0.5864                            | -0.5812                            | -4.2                               | -3.3                             |

<sup>a</sup>) Additive atomic energies are in au. Differences  $\Delta E_{\text{add}}^{\text{A}} = (E_{\text{add}}^{\text{A}})_{\text{B3LYP}} - (E_{\text{add}}^{\text{A}})_{\text{CCSD/BBC1}}$  and relative errors  $\Delta_{\text{add}}^{\text{A}} = \text{Comput } E_{\text{add}}^{\text{A}} - \text{Expect } E_{\text{add}}^{\text{A}}$  are in kcal mol<sup>-1</sup>.

**Table S2.** Relative to the CCSD/BBC1 data, analysis of additive atomic energies computed for the LEC of glycol at the B3LYP-GD3 level.<sup>a</sup>

| Atom A | CCSD/BBC1                   |                                 | B3LYP-GD3                          |                                    |                                    |                                  |
|--------|-----------------------------|---------------------------------|------------------------------------|------------------------------------|------------------------------------|----------------------------------|
|        | $E_{\text{add}}^{\text{A}}$ | $E_{\text{add}}^{\text{A}} / E$ | Comput $E_{\text{add}}^{\text{A}}$ | Expect $E_{\text{add}}^{\text{A}}$ | $\Delta E_{\text{add}}^{\text{A}}$ | $\Delta_{\text{add}}^{\text{A}}$ |
| C1     | -37.94313                   | 0.16518                         | -38.0436                           | -38.0400                           | -63.0                              | -2.2                             |
| C2     | -37.94389                   | 0.16518                         | -38.0435                           | -38.0408                           | -62.5                              | -1.7                             |
| O3     | -75.25949                   | 0.32762                         | -75.4368                           | -75.4517                           | -111.3                             | 9.3                              |
| O4     | -75.27158                   | 0.32768                         | -75.4463                           | -75.4638                           | -109.6                             | 11.0                             |
| H5     | -0.48480                    | 0.00211                         | -0.4868                            | -0.4860                            | -1.3                               | -0.5                             |
| H6     | -0.48892                    | 0.00213                         | -0.4917                            | -0.4902                            | -1.7                               | -1.0                             |
| H7     | -0.58017                    | 0.00253                         | -0.5866                            | -0.5817                            | -4.0                               | -3.1                             |
| H8     | -0.58022                    | 0.00253                         | -0.5859                            | -0.5817                            | -3.6                               | -2.6                             |
| H9     | -0.58095                    | 0.00253                         | -0.5877                            | -0.5824                            | -4.2                               | -3.3                             |
| H10    | -0.57971                    | 0.00252                         | -0.5863                            | -0.5812                            | -4.2                               | -3.2                             |

<sup>a</sup>) Additive atomic energies are in au. Differences  $\Delta E_{\text{add}}^{\text{A}} = (E_{\text{add}}^{\text{A}})_{\text{B3LYP-GD3}} - (E_{\text{add}}^{\text{A}})_{\text{CCSD/BBC1}}$  and relative errors  $\Delta_{\text{add}}^{\text{A}} = \text{Comput } E_{\text{add}}^{\text{A}} - \text{Expect } E_{\text{add}}^{\text{A}}$  are in kcal mol<sup>-1</sup>.

**Table S3.** Relative to the CCSD/BBC1 data, analysis of additive atomic energies computed for the **LEC** of glycol at the MP2/Müller level.<sup>a</sup>

| Atom A | CCSD/BBC1          |                        | MP2/Müller                |                           |                           |                         |
|--------|--------------------|------------------------|---------------------------|---------------------------|---------------------------|-------------------------|
|        | $E_{\text{add}}^A$ | $E_{\text{add}}^A / E$ | Comput $E_{\text{add}}^A$ | Expect $E_{\text{add}}^A$ | $\Delta E_{\text{add}}^A$ | $\Delta_{\text{add}}^A$ |
| C1     | -37.94313          | 0.16518                | -37.9801                  | -37.9373                  | -23.2                     | -26.9                   |
| C2     | -37.94389          | 0.16518                | -37.9801                  | -37.9380                  | -22.7                     | -26.4                   |
| O3     | -75.25949          | 0.32762                | -75.3233                  | -75.2479                  | -40.1                     | -47.4                   |
| O4     | -75.27158          | 0.32768                | -75.3335                  | -75.2600                  | -38.9                     | -46.1                   |
| H5     | -0.48480           | 0.00211                | -0.4868                   | -0.4847                   | -1.3                      | -1.3                    |
| H6     | -0.48892           | 0.00213                | -0.4923                   | -0.4888                   | -2.1                      | -2.2                    |
| H7     | -0.58017           | 0.00253                | -0.5884                   | -0.5801                   | -5.1                      | -5.2                    |
| H8     | -0.58022           | 0.00253                | -0.5878                   | -0.5801                   | -4.8                      | -4.8                    |
| H9     | -0.58095           | 0.00253                | -0.5896                   | -0.5809                   | -5.4                      | -5.5                    |
| H10    | -0.57971           | 0.00252                | -0.5882                   | -0.5796                   | -5.3                      | -5.4                    |

<sup>a</sup>) Additive atomic energies are in au. Differences  $\Delta E_{\text{add}}^A = (E_{\text{add}}^A)_{\text{MP2/Müller}} - (E_{\text{add}}^A)_{\text{CCSD/BBC1}}$  and relative errors  $\Delta_{\text{add}}^A = \text{Comput } E_{\text{add}}^A - \text{Expect } E_{\text{add}}^A$  are in kcal mol<sup>-1</sup>.

**Table S4.** Relative to the CCSD/BBC1 data, analysis of additive atomic energies computed for the **Lin** conformer of glycol at the HF level.<sup>a</sup>

| Atom A | CCSD/BBC1          |                        | HF                        |                           |                           |                         |
|--------|--------------------|------------------------|---------------------------|---------------------------|---------------------------|-------------------------|
|        | $E_{\text{add}}^A$ | $E_{\text{add}}^A / E$ | Comput $E_{\text{add}}^A$ | Expect $E_{\text{add}}^A$ | $\Delta E_{\text{add}}^A$ | $\Delta_{\text{add}}^A$ |
| C1     | -37.9415           | 0.16517                | -37.8175                  | -37.8201                  | 77.9                      | 1.6                     |
| C2     | -37.9415           | 0.16517                | -37.8175                  | -37.8201                  | 77.9                      | 1.6                     |
| O3     | -75.2615           | 0.32764                | -75.0503                  | -75.0206                  | 132.6                     | -18.6                   |
| O4     | -75.2615           | 0.32764                | -75.0503                  | -75.0206                  | 132.6                     | -18.6                   |
| H5     | -0.4863            | 0.00212                | -0.4840                   | -0.4847                   | 1.4                       | 0.5                     |
| H6     | -0.4863            | 0.00212                | -0.4840                   | -0.4847                   | 1.4                       | 0.5                     |
| H7     | -0.5800            | 0.00253                | -0.5678                   | -0.5782                   | 7.7                       | 6.5                     |
| H8     | -0.5800            | 0.00253                | -0.5678                   | -0.5782                   | 7.7                       | 6.5                     |
| H9     | -0.5800            | 0.00253                | -0.5678                   | -0.5782                   | 7.7                       | 6.5                     |
| H10    | -0.5800            | 0.00253                | -0.5678                   | -0.5782                   | 7.7                       | 6.5                     |

<sup>a</sup>) Additive atomic energies are in au. Differences  $\Delta E_{\text{add}}^A = (E_{\text{add}}^A)_{\text{HF}} - (E_{\text{add}}^A)_{\text{CCSD/BBC1}}$  and relative errors  $\Delta_{\text{add}}^A = \text{Comput } E_{\text{add}}^A - \text{Expect } E_{\text{add}}^A$  are in kcal mol<sup>-1</sup>.

**Table S5.** Relative to the CCSD/BBC1 data, analysis of additive atomic energies computed for the **Lin** conformer of glycol at the B3LYP level.<sup>a</sup>

| Atom A | CCSD/BBC1                   |                                 | B3LYP                              |                                    |                                    |                                  |
|--------|-----------------------------|---------------------------------|------------------------------------|------------------------------------|------------------------------------|----------------------------------|
|        | $E_{\text{add}}^{\text{A}}$ | $E_{\text{add}}^{\text{A}} / E$ | Comput $E_{\text{add}}^{\text{A}}$ | Expect $E_{\text{add}}^{\text{A}}$ | $\Delta E_{\text{add}}^{\text{A}}$ | $\Delta_{\text{add}}^{\text{A}}$ |
| C1     | -37.9415                    | 0.16517                         | -38.0417                           | -38.0376                           | -62.9                              | -2.6                             |
| C2     | -37.9415                    | 0.16517                         | -38.0417                           | -38.0376                           | -62.9                              | -2.6                             |
| O3     | -75.2615                    | 0.32764                         | -75.4414                           | -75.4521                           | -112.9                             | 6.7                              |
| O4     | -75.2615                    | 0.32764                         | -75.4414                           | -75.4521                           | -112.9                             | 6.7                              |
| H5     | -0.4863                     | 0.00212                         | -0.4894                            | -0.4875                            | -1.9                               | -1.2                             |
| H6     | -0.4863                     | 0.00212                         | -0.4894                            | -0.4875                            | -1.9                               | -1.2                             |
| H7     | -0.5800                     | 0.00253                         | -0.5866                            | -0.5815                            | -4.1                               | -3.2                             |
| H8     | -0.5800                     | 0.00253                         | -0.5866                            | -0.5815                            | -4.1                               | -3.2                             |
| H9     | -0.5800                     | 0.00253                         | -0.5866                            | -0.5815                            | -4.1                               | -3.2                             |
| H10    | -0.5800                     | 0.00253                         | -0.5866                            | -0.5815                            | -4.1                               | -3.2                             |

<sup>a</sup>) Additive atomic energies are in au. Differences  $\Delta E_{\text{add}}^{\text{A}} = (E_{\text{add}}^{\text{A}})_{\text{B3LYP}} - (E_{\text{add}}^{\text{A}})_{\text{CCSD/BBC1}}$  and relative errors  $\Delta_{\text{add}}^{\text{A}} = \text{Comput } E_{\text{add}}^{\text{A}} - \text{Expect } E_{\text{add}}^{\text{A}}$  are in kcal mol<sup>-1</sup>.

**Table S6.** Relative to the CCSD/BBC1 data, analysis of additive atomic energies computed for the **Lin** conformer of glycol at the B3LYP-GD3 level.<sup>a</sup>

| Atom A | CCSD/BBC1                   |                                 | B3LYP-GD3                          |                                    |                                    |                                  |
|--------|-----------------------------|---------------------------------|------------------------------------|------------------------------------|------------------------------------|----------------------------------|
|        | $E_{\text{add}}^{\text{A}}$ | $E_{\text{add}}^{\text{A}} / E$ | Comput $E_{\text{add}}^{\text{A}}$ | Expect $E_{\text{add}}^{\text{A}}$ | $\Delta E_{\text{add}}^{\text{A}}$ | $\Delta_{\text{add}}^{\text{A}}$ |
| C1     | -37.9415                    | 0.16517                         | -38.0416                           | -38.0384                           | -62.8                              | -2.0                             |
| C2     | -37.9415                    | 0.16517                         | -38.0416                           | -38.0384                           | -62.8                              | -2.0                             |
| O3     | -75.2615                    | 0.32764                         | -75.4415                           | -75.4537                           | -112.9                             | 7.7                              |
| O4     | -75.2615                    | 0.32764                         | -75.4415                           | -75.4537                           | -112.9                             | 7.7                              |
| H5     | -0.4863                     | 0.00212                         | -0.4894                            | -0.4875                            | -2.0                               | -1.2                             |
| H6     | -0.4863                     | 0.00212                         | -0.4894                            | -0.4875                            | -2.0                               | -1.2                             |
| H7     | -0.5800                     | 0.00253                         | -0.5866                            | -0.5815                            | -4.1                               | -3.2                             |
| H8     | -0.5800                     | 0.00253                         | -0.5866                            | -0.5815                            | -4.1                               | -3.2                             |
| H9     | -0.5800                     | 0.00253                         | -0.5866                            | -0.5815                            | -4.1                               | -3.2                             |
| H10    | -0.5800                     | 0.00253                         | -0.5866                            | -0.5815                            | -4.1                               | -3.2                             |

<sup>a</sup>) Additive atomic energies are in au. Differences  $\Delta E_{\text{add}}^{\text{A}} = (E_{\text{add}}^{\text{A}})_{\text{B3LYP-GD3}} - (E_{\text{add}}^{\text{A}})_{\text{CCSD/BBC1}}$  and relative errors  $\Delta_{\text{add}}^{\text{A}} = \text{Comput } E_{\text{add}}^{\text{A}} - \text{Expect } E_{\text{add}}^{\text{A}}$  are in kcal mol<sup>-1</sup>.

**Table S7.** Relative to the CCSD/BBC1 data, analysis of additive atomic energies computed for the **Lin** conformer of glycol at the MP2/Müller level.<sup>a</sup>

| Atom A | CCSD/BBC1                   |                                 | MP2/Müller                         |                                    |                                    |                                  |
|--------|-----------------------------|---------------------------------|------------------------------------|------------------------------------|------------------------------------|----------------------------------|
|        | $E_{\text{add}}^{\text{A}}$ | $E_{\text{add}}^{\text{A}} / E$ | Comput $E_{\text{add}}^{\text{A}}$ | Expect $E_{\text{add}}^{\text{A}}$ | $\Delta E_{\text{add}}^{\text{A}}$ | $\Delta_{\text{add}}^{\text{A}}$ |
| C1     | -37.9415                    | 0.16517                         | -37.9781                           | -37.9356                           | -23.0                              | -26.7                            |
| C2     | -37.9415                    | 0.16517                         | -37.9781                           | -37.9356                           | -23.0                              | -26.7                            |
| O3     | -75.2615                    | 0.32764                         | -75.3279                           | -75.2498                           | -41.7                              | -49.0                            |
| O4     | -75.2615                    | 0.32764                         | -75.3279                           | -75.2498                           | -41.7                              | -49.0                            |
| H5     | -0.4863                     | 0.00212                         | -0.4898                            | -0.4862                            | -2.2                               | -2.3                             |
| H6     | -0.4863                     | 0.00212                         | -0.4898                            | -0.4862                            | -2.2                               | -2.3                             |
| H7     | -0.5800                     | 0.00253                         | -0.5884                            | -0.5799                            | -5.3                               | -5.3                             |
| H8     | -0.5800                     | 0.00253                         | -0.5884                            | -0.5799                            | -5.3                               | -5.3                             |
| H9     | -0.5800                     | 0.00253                         | -0.5884                            | -0.5799                            | -5.3                               | -5.3                             |
| H10    | -0.5800                     | 0.00253                         | -0.5884                            | -0.5799                            | -5.3                               | -5.3                             |

<sup>a</sup>) Additive atomic energies are in au. Differences  $\Delta E_{\text{add}}^{\text{A}} = (E_{\text{add}}^{\text{A}})_{\text{MP2/Müller}} - (E_{\text{add}}^{\text{A}})_{\text{CCSD/BBC1}}$  and relative errors  $\Delta_{\text{add}}^{\text{A}} = \text{Comput } E_{\text{add}}^{\text{A}} - \text{Expect } E_{\text{add}}^{\text{A}}$  are in kcal mol<sup>-1</sup>.

**Table S8.** Relative to the CCSD/BBC1 data, analysis of additive atomic energies computed for the **Ecl** conformer of glycol at the HF level.<sup>a</sup>

| Atom A | CCSD/BBC1                   |                                 | HF                                 |                                    |                                    |                                  |
|--------|-----------------------------|---------------------------------|------------------------------------|------------------------------------|------------------------------------|----------------------------------|
|        | $E_{\text{add}}^{\text{A}}$ | $E_{\text{add}}^{\text{A}} / E$ | Comput $E_{\text{add}}^{\text{A}}$ | Expect $E_{\text{add}}^{\text{A}}$ | $\Delta E_{\text{add}}^{\text{A}}$ | $\Delta_{\text{add}}^{\text{A}}$ |
| C1     | -37.9412                    | 0.16518                         | -37.8166                           | -37.8195                           | 78.2                               | 1.8                              |
| C2     | -37.9412                    | 0.16518                         | -37.8169                           | -37.8195                           | 78.0                               | 1.6                              |
| O3     | -75.2510                    | 0.32761                         | -75.0378                           | -75.0096                           | 133.8                              | -17.7                            |
| O4     | -75.2510                    | 0.32761                         | -75.0378                           | -75.0096                           | 133.8                              | -17.7                            |
| H5     | -0.4894                     | 0.00213                         | -0.4871                            | -0.4878                            | 1.4                                | 0.4                              |
| H6     | -0.4894                     | 0.00213                         | -0.4871                            | -0.4878                            | 1.4                                | 0.4                              |
| H7     | -0.5812                     | 0.00253                         | -0.5687                            | -0.5794                            | 7.8                                | 6.7                              |
| H8     | -0.5812                     | 0.00253                         | -0.5687                            | -0.5794                            | 7.8                                | 6.7                              |
| H9     | -0.5812                     | 0.00253                         | -0.5687                            | -0.5794                            | 7.8                                | 6.7                              |
| H10    | -0.5812                     | 0.00253                         | -0.5687                            | -0.5794                            | 7.8                                | 6.7                              |

<sup>a</sup>) Additive atomic energies are in au. Differences  $\Delta E_{\text{add}}^{\text{A}} = (E_{\text{add}}^{\text{A}})_{\text{HF}} - (E_{\text{add}}^{\text{A}})_{\text{CCSD/BBC1}}$  and relative errors  $\Delta_{\text{add}}^{\text{A}} = \text{Comput } E_{\text{add}}^{\text{A}} - \text{Expect } E_{\text{add}}^{\text{A}}$  are in kcal mol<sup>-1</sup>.

**Table S9.** Relative to the CCSD/BBC1 data, analysis of additive atomic energies computed for the **Ecl** conformer of glycol at the B3LYP level.<sup>a</sup>

| Atom A | CCSD/BBC1                   |                                 | B3LYP                              |                                    |                                    |                                  |
|--------|-----------------------------|---------------------------------|------------------------------------|------------------------------------|------------------------------------|----------------------------------|
|        | $E_{\text{add}}^{\text{A}}$ | $E_{\text{add}}^{\text{A}} / E$ | Comput $E_{\text{add}}^{\text{A}}$ | Expect $E_{\text{add}}^{\text{A}}$ | $\Delta E_{\text{add}}^{\text{A}}$ | $\Delta_{\text{add}}^{\text{A}}$ |
| C1     | -37.9412                    | 0.16518                         | -38.0412                           | -38.0373                           | -62.8                              | -2.4                             |
| C2     | -37.9412                    | 0.16518                         | -38.0413                           | -38.0373                           | -62.9                              | -2.5                             |
| O3     | -75.2510                    | 0.32761                         | -75.4290                           | -75.4418                           | -111.7                             | 8.0                              |
| O4     | -75.2510                    | 0.32761                         | -75.4290                           | -75.4418                           | -111.7                             | 8.0                              |
| H5     | -0.4894                     | 0.00213                         | -0.4922                            | -0.4906                            | -1.8                               | -1.0                             |
| H6     | -0.4894                     | 0.00213                         | -0.4922                            | -0.4906                            | -1.8                               | -1.0                             |
| H7     | -0.5812                     | 0.00253                         | -0.5880                            | -0.5827                            | -4.3                               | -3.3                             |
| H8     | -0.5812                     | 0.00253                         | -0.5880                            | -0.5827                            | -4.3                               | -3.3                             |
| H9     | -0.5812                     | 0.00253                         | -0.5880                            | -0.5827                            | -4.3                               | -3.3                             |
| H10    | -0.5812                     | 0.00253                         | -0.5880                            | -0.5827                            | -4.3                               | -3.3                             |

<sup>a</sup>) Additive atomic energies are in au. Differences  $\Delta E_{\text{add}}^{\text{A}} = (E_{\text{add}}^{\text{A}})_{\text{B3LYP}} - (E_{\text{add}}^{\text{A}})_{\text{CCSD/BBC1}}$  and relative errors  $\Delta_{\text{add}}^{\text{A}} = \text{Comput } E_{\text{add}}^{\text{A}} - \text{Expect } E_{\text{add}}^{\text{A}}$  are in kcal mol<sup>-1</sup>.

**Table S10.** Relative to the CCSD/BBC1 data, analysis of additive atomic energies computed for the **Ecl** conformer of glycol at the B3LYP-GD3 level.<sup>a</sup>

| Atom A | CCSD/BBC1                   |                                 | B3LYP-GD3                          |                                    |                                    |                                  |
|--------|-----------------------------|---------------------------------|------------------------------------|------------------------------------|------------------------------------|----------------------------------|
|        | $E_{\text{add}}^{\text{A}}$ | $E_{\text{add}}^{\text{A}} / E$ | Comput $E_{\text{add}}^{\text{A}}$ | Expect $E_{\text{add}}^{\text{A}}$ | $\Delta E_{\text{add}}^{\text{A}}$ | $\Delta_{\text{add}}^{\text{A}}$ |
| C1     | -37.9412                    | 0.16518                         | -38.0413                           | -38.0380                           | -62.8                              | -2.0                             |
| C2     | -37.9412                    | 0.16518                         | -38.0414                           | -38.0380                           | -62.9                              | -2.1                             |
| O3     | -75.2510                    | 0.32761                         | -75.4290                           | -75.4431                           | -111.7                             | 8.8                              |
| O4     | -75.2510                    | 0.32761                         | -75.4290                           | -75.4431                           | -111.7                             | 8.8                              |
| H5     | -0.4894                     | 0.00213                         | -0.4922                            | -0.4906                            | -1.8                               | -1.0                             |
| H6     | -0.4894                     | 0.00213                         | -0.4922                            | -0.4906                            | -1.8                               | -1.0                             |
| H7     | -0.5812                     | 0.00253                         | -0.5880                            | -0.5827                            | -4.3                               | -3.3                             |
| H8     | -0.5812                     | 0.00253                         | -0.5880                            | -0.5827                            | -4.3                               | -3.3                             |
| H9     | -0.5812                     | 0.00253                         | -0.5880                            | -0.5827                            | -4.3                               | -3.3                             |
| H10    | -0.5812                     | 0.00253                         | -0.5880                            | -0.5827                            | -4.3                               | -3.3                             |

<sup>a</sup>) Additive atomic energies are in au. Differences  $\Delta E_{\text{add}}^{\text{A}} = (E_{\text{add}}^{\text{A}})_{\text{B3LYP-GD3}} - (E_{\text{add}}^{\text{A}})_{\text{CCSD/BBC1}}$  and relative errors  $\Delta_{\text{add}}^{\text{A}} = \text{Comput } E_{\text{add}}^{\text{A}} - \text{Expect } E_{\text{add}}^{\text{A}}$  are in kcal mol<sup>-1</sup>.

**Table S11.** Relative to the CCSD/BBC1 data, analysis of additive atomic energies computed for the **Ecl** conformer of glycol at the MP2/Müller level.<sup>a</sup>

| Atom A | CCSD/BBC1                   |                                 | MP2/Müller                         |                                    |                                    |                                  |
|--------|-----------------------------|---------------------------------|------------------------------------|------------------------------------|------------------------------------|----------------------------------|
|        | $E_{\text{add}}^{\text{A}}$ | $E_{\text{add}}^{\text{A}} / E$ | Comput $E_{\text{add}}^{\text{A}}$ | Expect $E_{\text{add}}^{\text{A}}$ | $\Delta E_{\text{add}}^{\text{A}}$ | $\Delta_{\text{add}}^{\text{A}}$ |
| C1     | -37.9412                    | 0.16518                         | -37.9781                           | -37.9352                           | -23.2                              | -26.9                            |
| C2     | -37.9412                    | 0.16518                         | -37.9781                           | -37.9352                           | -23.2                              | -26.9                            |
| O3     | -75.2510                    | 0.32761                         | -75.3154                           | -75.2392                           | -40.4                              | -47.8                            |
| O4     | -75.2510                    | 0.32761                         | -75.3153                           | -75.2392                           | -40.4                              | -47.8                            |
| H5     | -0.4894                     | 0.00213                         | -0.4932                            | -0.4893                            | -2.4                               | -2.4                             |
| H6     | -0.4894                     | 0.00213                         | -0.4932                            | -0.4893                            | -2.4                               | -2.4                             |
| H7     | -0.5812                     | 0.00253                         | -0.5899                            | -0.5812                            | -5.4                               | -5.5                             |
| H8     | -0.5812                     | 0.00253                         | -0.5899                            | -0.5812                            | -5.4                               | -5.5                             |
| H9     | -0.5812                     | 0.00253                         | -0.5899                            | -0.5812                            | -5.4                               | -5.5                             |
| H10    | -0.5812                     | 0.00253                         | -0.5899                            | -0.5812                            | -5.4                               | -5.5                             |

<sup>a</sup>) Additive atomic energies are in au. Differences  $\Delta E_{\text{add}}^{\text{A}} = (E_{\text{add}}^{\text{A}})_{\text{MP2/Müller}} - (E_{\text{add}}^{\text{A}})_{\text{CCSD/BBC1}}$  and relative errors  $\Delta_{\text{add}}^{\text{A}} = \text{Comput } E_{\text{add}}^{\text{A}} - \text{Expect } E_{\text{add}}^{\text{A}}$  are in kcal mol<sup>-1</sup>.

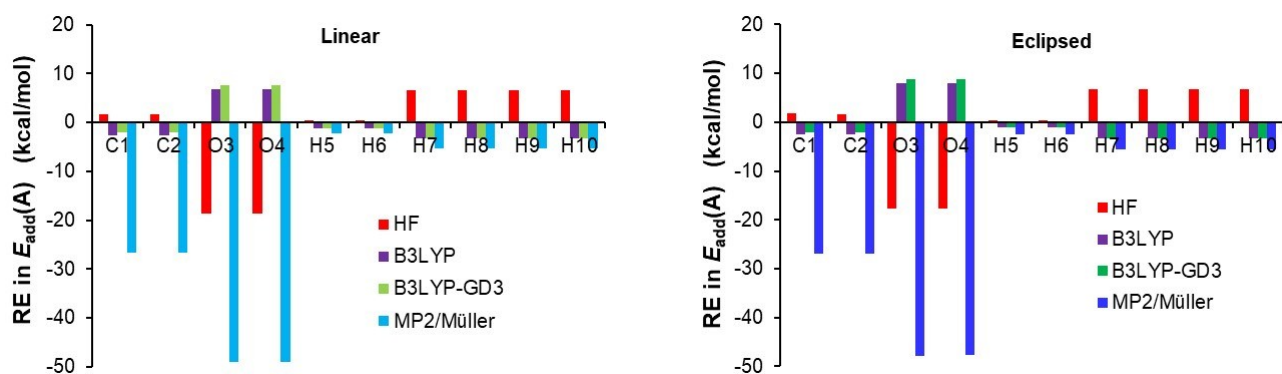

**Figure S1.** Using the CCSD/BBC1 data as reference, relative errors (RE) in individual additive atomic energies obtained at the indicated levels of theory for the eclipsed and linear conformers of glycol.

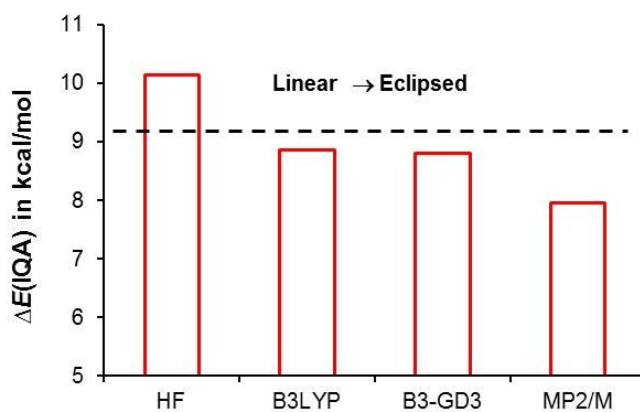

**Figure S2.** Change in  $E_{IQA}$  at the indicated levels of theory for the **Lin** → **Ecl** structural transformation of glycol (dashed line indicates the  $\Delta E$  value obtained at CCSD. B3-GD3 = B3LYP-GD3 and MP2/M = MP2/Müller).

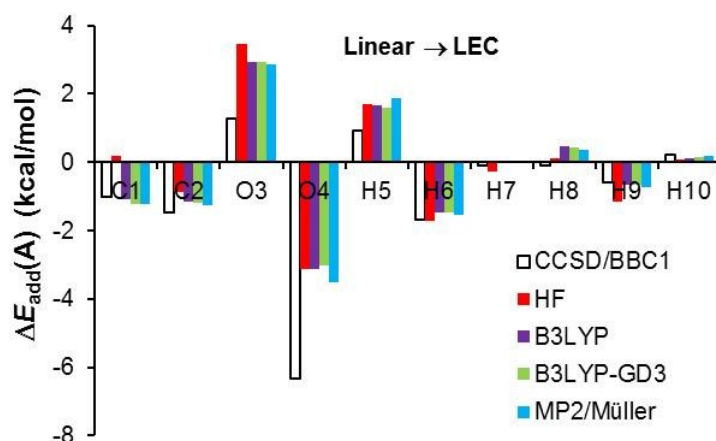

**Figure S3.** Change in individual additive atomic energies computed at the indicated levels of theory for the **Lin** → **LEC** structural transformation of glycol.



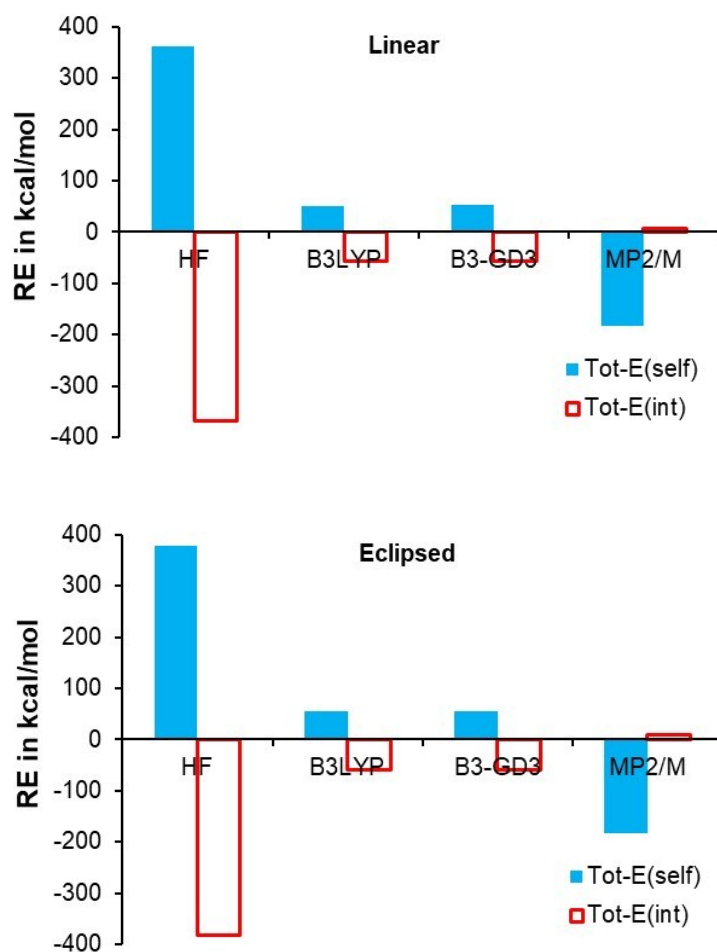

**Figure S4.** Using the CCSD/BBC1 data as a reference, relative errors (RE) in the total self-molecular and total interaction energies (solid and empty bars, respectively) obtained for the linear and eclipsed conformers of glycol at the indicated levels of theory.

**Table S12.** Using the CCSD/BBC1 data as a reference, relative errors in the total self-molecular energy ( $\Delta_{\text{self}}^{\text{Tot}}$ ) and total interaction energy ( $\Delta_{\text{int}}^{\text{Tot}}$ ) in three conformers of glycol optimized at the specified level of theory. Except CCSD/BBC1, all data are from AIMAll.<sup>a</sup>

| <i>E</i> -term                                                         | HF                            | B3LYP     | B3LYP-GD3 | MP2/Müller |
|------------------------------------------------------------------------|-------------------------------|-----------|-----------|------------|
|                                                                        | LEC / lowest energy conformer |           |           |            |
| Comput $E_{\text{self}}^{\text{Tot}}$                                  | -225.2208                     | -227.0177 | -227.0209 | -226.7799  |
| Expect $E_{\text{self}}^{\text{Tot}}$                                  | -225.8019                     | -227.1016 | -227.1065 | -226.4931  |
| $\Delta_{\text{self}}^{\text{Tot}}$                                    | 364.6                         | 52.7      | 53.7      | -180.0     |
| Comput $E_{\text{int}}^{\text{Tot}}$                                   | -3.7558                       | -3.2786   | -3.2757   | -3.1702    |
| Expect $E_{\text{int}}^{\text{Tot}}$                                   | -3.1746                       | -3.1929   | -3.1930   | -3.1844    |
| $\Delta_{\text{int}}^{\text{Tot}}$                                     | -364.7                        | -53.8     | -51.9     | 8.9        |
| $\Delta_{\text{self}}^{\text{Tot}} + \Delta_{\text{int}}^{\text{Tot}}$ | -0.1                          | -1.1      | -1.2      | -171.1     |
| Ecl / eclipsed conformer                                               |                               |           |           |            |
| Comput $E_{\text{self}}^{\text{Tot}}$                                  | -225.1992                     | -227.0133 | -227.0162 | -226.7841  |
| Expect $E_{\text{self}}^{\text{Tot}}$                                  | -225.8009                     | -227.1018 | -227.1058 | -226.4921  |
| $\Delta_{\text{self}}^{\text{Tot}}$                                    | 377.6                         | 55.5      | 56.3      | -183.3     |
| Comput $E_{\text{int}}^{\text{Tot}}$                                   | -3.7606                       | -3.2644   | -3.2613   | -3.1459    |
| Expect $E_{\text{int}}^{\text{Tot}}$                                   | -3.1504                       | -3.1685   | -3.1686   | -3.1600    |
| $\Delta_{\text{int}}^{\text{Tot}}$                                     | -382.9                        | -60.2     | -58.2     | 8.9        |
| $\Delta_{\text{self}}^{\text{Tot}} + \Delta_{\text{int}}^{\text{Tot}}$ | -5.3                          | -4.7      | -1.9      | -174.4     |
| Lin / linear conformer                                                 |                               |           |           |            |
| Comput $E_{\text{self}}^{\text{Tot}}$                                  | -225.2322                     | -227.0256 | -227.0267 | -226.7905  |
| Expect $E_{\text{self}}^{\text{Tot}}$                                  | -225.8071                     | -227.1060 | -227.1106 | -226.4969  |
| $\Delta_{\text{self}}^{\text{Tot}}$                                    | 360.8                         | 50.5      | 52.6      | -184.2     |
| Comput $E_{\text{int}}^{\text{Tot}}$                                   | -3.7415                       | -3.2658   | -3.2646   | -3.1546    |
| Expect $E_{\text{int}}^{\text{Tot}}$                                   | -3.1563                       | -3.1745   | -3.1745   | -3.1660    |
| $\Delta_{\text{int}}^{\text{Tot}}$                                     | -367.2                        | -57.3     | -56.5     | 7.1        |
| $\Delta_{\text{self}}^{\text{Tot}} + \Delta_{\text{int}}^{\text{Tot}}$ | -6.4                          | -6.8      | -3.8      | -177.1     |

[a] The default settings in AIMAll were used throughout. The expected and computed values ( $\text{Expect } E_{\text{self}}^{\text{Tot}}$ ,  $\text{Expect } E_{\text{int}}^{\text{Tot}}$ ,  $\text{Comput } E_{\text{self}}^{\text{Tot}}$ ,  $\text{Comput } E_{\text{int}}^{\text{Tot}}$ ) are in au; relative errors ( $\Delta_{\text{self}}^{\text{Tot}}$ ,  $\Delta_{\text{int}}^{\text{Tot}}$ ) are in kcal mol<sup>-1</sup>.

**Table S13.** Relative to the CCSD/BBC1 data, analysis of self-atomic energies computed for the LEC of glycol at the HF level.<sup>a</sup>

| Atom A | CCSD/BBC1           |                         | HF                         |                            |                            |                          |
|--------|---------------------|-------------------------|----------------------------|----------------------------|----------------------------|--------------------------|
|        | $E_{\text{self}}^A$ | $E_{\text{self}}^A / E$ | Comput $E_{\text{self}}^A$ | Expect $E_{\text{self}}^A$ | $\Delta E_{\text{self}}^A$ | $\Delta_{\text{self}}^A$ |
| C1     | -37.37564           | 0.162706                | -37.13622                  | -37.25584                  | 150.2                      | 75.1                     |
| C2     | -37.36186           | 0.162645                | -37.11562                  | -37.24209                  | 154.5                      | 79.4                     |
| O3     | -74.67762           | 0.325090                | -74.35317                  | -74.43824                  | 203.6                      | 53.4                     |
| O4     | -74.68076           | 0.325104                | -74.35866                  | -74.44138                  | 202.1                      | 51.9                     |
| H5     | -0.29952            | 0.001304                | -0.27503                   | -0.29856                   | 15.4                       | 14.8                     |
| H6     | -0.29375            | 0.001279                | -0.27060                   | -0.29281                   | 14.5                       | 13.9                     |
| H7     | -0.45915            | 0.001999                | -0.42755                   | -0.45768                   | 19.8                       | 18.9                     |
| H8     | -0.46056            | 0.002005                | -0.42875                   | -0.45909                   | 20.0                       | 19.0                     |
| H9     | -0.45985            | 0.002002                | -0.42757                   | -0.45838                   | 20.3                       | 19.3                     |
| H10    | -0.45930            | 0.001999                | -0.42767                   | -0.45783                   | 19.8                       | 18.9                     |

<sup>a</sup>) Self-atomic energies are in au. Differences  $\Delta E_{\text{self}}^A = (E_{\text{self}}^A)_{\text{HF}} - (E_{\text{self}}^A)_{\text{CCSD/BBC1}}$  and relative errors  $\Delta_{\text{self}}^A = \text{Comput } E_{\text{self}}^A - \text{Expect } E_{\text{self}}^A$  are in kcal mol<sup>-1</sup>.

**Table S14.** Relative to the CCSD/BBC1 data, analysis of self-atomic energies computed for the LEC of glycol at the B3LYP level.<sup>a</sup>

| Atom A | CCSD                |                         | B3LYP                      |                            |                            |                          |
|--------|---------------------|-------------------------|----------------------------|----------------------------|----------------------------|--------------------------|
|        | $E_{\text{self}}^A$ | $E_{\text{self}}^A / E$ | Comput $E_{\text{self}}^A$ | Expect $E_{\text{self}}^A$ | $\Delta E_{\text{self}}^A$ | $\Delta_{\text{self}}^A$ |
| C1     | -37.37564           | 0.162706                | -37.44785                  | -37.47029                  | -45.3                      | 14.1                     |
| C2     | -37.36186           | 0.162645                | -37.43598                  | -37.45646                  | -46.5                      | 12.9                     |
| O3     | -74.67762           | 0.325090                | -74.86021                  | -74.86671                  | -114.6                     | 4.1                      |
| O4     | -74.68076           | 0.325104                | -74.86238                  | -74.86987                  | -114.0                     | 4.7                      |
| H5     | -0.29952            | 0.001304                | -0.29622                   | -0.30027                   | 2.1                        | 2.5                      |
| H6     | -0.29375            | 0.001279                | -0.29243                   | -0.29449                   | 0.8                        | 1.3                      |
| H7     | -0.45915            | 0.001999                | -0.45535                   | -0.46031                   | 2.4                        | 3.1                      |
| H8     | -0.46056            | 0.002005                | -0.45573                   | -0.46173                   | 3.0                        | 3.8                      |
| H9     | -0.45985            | 0.002002                | -0.45600                   | -0.46101                   | 2.4                        | 3.1                      |
| H10    | -0.45930            | 0.001999                | -0.45555                   | -0.46046                   | 2.4                        | 3.1                      |

<sup>a</sup>) Self-atomic energies are in au. Differences  $\Delta E_{\text{self}}^A = (E_{\text{self}}^A)_{\text{B3LYP}} - (E_{\text{self}}^A)_{\text{CCSD/BBC1}}$  and relative errors  $\Delta_{\text{self}}^A = \text{Comput } E_{\text{self}}^A - \text{Expect } E_{\text{self}}^A$  are in kcal mol<sup>-1</sup>.

**Table S15.** Relative to the CCSD/BBC1 data, analysis of self-atomic energies computed for the LEC of glycol at the B3LYP-GD3 level.<sup>a</sup>

| Atom A | CCSD/BBC1           |                         | B3LYP-GD3                  |                            |                            |                          |
|--------|---------------------|-------------------------|----------------------------|----------------------------|----------------------------|--------------------------|
|        | $E_{\text{self}}^A$ | $E_{\text{self}}^A / E$ | Comput $E_{\text{self}}^A$ | Expect $E_{\text{self}}^A$ | $\Delta E_{\text{self}}^A$ | $\Delta_{\text{self}}^A$ |
| C1     | -37.37564           | 0.162706                | -37.44853                  | -37.47110                  | -45.7                      | 14.2                     |
| C2     | -37.36186           | 0.162645                | -37.43679                  | -37.45727                  | -47.0                      | 12.9                     |
| O3     | -74.67762           | 0.325090                | -74.86096                  | -74.86833                  | -115.0                     | 4.6                      |
| O4     | -74.68076           | 0.325104                | -74.86332                  | -74.87149                  | -114.6                     | 5.1                      |
| H5     | -0.29952            | 0.001304                | -0.29626                   | -0.30028                   | 2.0                        | 2.5                      |
| H6     | -0.29375            | 0.001279                | -0.29249                   | -0.29450                   | 0.8                        | 1.3                      |
| H7     | -0.45915            | 0.001999                | -0.45530                   | -0.46032                   | 2.4                        | 3.1                      |
| H8     | -0.46056            | 0.002005                | -0.45576                   | -0.46174                   | 3.0                        | 3.8                      |
| H9     | -0.45985            | 0.002002                | -0.45607                   | -0.46102                   | 2.4                        | 3.1                      |
| H10    | -0.45930            | 0.001999                | -0.45555                   | -0.46047                   | 2.4                        | 3.1                      |

<sup>a</sup>) Self-atomic energies are in au. Differences  $\Delta E_{\text{self}}^A = (E_{\text{self}}^A)_{\text{B3LYP-GD3}} - (E_{\text{self}}^A)_{\text{CCSD/BBC1}}$  and relative errors  $\Delta_{\text{self}}^A = \text{Comput } E_{\text{self}}^A - \text{Expect } E_{\text{self}}^A$  are in kcal mol<sup>-1</sup>.

**Table S16.** Relative to the CCSD/BBC1 data, analysis of self-atomic energies computed for the LEC of glycol at the MP2/Müller level.<sup>a</sup>

| Atom A | CCSD/BBC1           |                         | MP2/Müller                 |                            |                            |                          |
|--------|---------------------|-------------------------|----------------------------|----------------------------|----------------------------|--------------------------|
|        | $E_{\text{self}}^A$ | $E_{\text{self}}^A / E$ | Comput $E_{\text{self}}^A$ | Expect $E_{\text{self}}^A$ | $\Delta E_{\text{self}}^A$ | $\Delta_{\text{self}}^A$ |
| C1     | -37.37564           | 0.162706                | -37.41773                  | -37.36988                  | -26.4                      | -30.0                    |
| C2     | -37.36186           | 0.162645                | -37.40381                  | -37.35609                  | -26.3                      | -29.9                    |
| O3     | -74.67762           | 0.325090                | -74.74816                  | -74.66610                  | -44.3                      | -51.5                    |
| O4     | -74.68076           | 0.325104                | -74.74964                  | -74.66925                  | -43.2                      | -50.4                    |
| H5     | -0.29952            | 0.001304                | -0.29816                   | -0.29947                   | 0.9                        | 0.8                      |
| H6     | -0.29375            | 0.001279                | -0.29313                   | -0.29370                   | 0.4                        | 0.4                      |
| H7     | -0.45915            | 0.001999                | -0.46683                   | -0.45908                   | -4.8                       | -4.9                     |
| H8     | -0.46056            | 0.002005                | -0.46752                   | -0.46049                   | -4.4                       | -4.4                     |
| H9     | -0.45985            | 0.002002                | -0.46779                   | -0.45978                   | -5.0                       | -5.0                     |
| H10    | -0.45930            | 0.001999                | -0.46711                   | -0.45923                   | -4.9                       | -4.9                     |

<sup>a</sup>) Self-atomic energies are in au. Differences  $\Delta E_{\text{self}}^A = (E_{\text{self}}^A)_{\text{MP2/Müller}} - (E_{\text{self}}^A)_{\text{CCSD/BBC1}}$  and relative errors  $\Delta_{\text{self}}^A = \text{Comput } E_{\text{self}}^A - \text{Expect } E_{\text{self}}^A$  are in kcal mol<sup>-1</sup>.

**Table S17.** Relative to the CCSD/BBC1 data, analysis of self-atomic energies computed for the **Lin** conformer of glycol at the HF level.<sup>a</sup>

| Atom A | CCSD/BBC1           |                         | HF                         |                            |                            |                          |
|--------|---------------------|-------------------------|----------------------------|----------------------------|----------------------------|--------------------------|
|        | $E_{\text{self}}^A$ | $E_{\text{self}}^A / E$ | Comput $E_{\text{self}}^A$ | Expect $E_{\text{self}}^A$ | $\Delta E_{\text{self}}^A$ | $\Delta_{\text{self}}^A$ |
| C1     | -37.36617           | 0.162667                | -37.12468                  | -37.24656                  | 150.2                      | 76.5                     |
| C2     | -37.36617           | 0.162667                | -37.12468                  | -37.24656                  | 154.5                      | 76.5                     |
| O3     | -74.68168           | 0.325113                | -74.36059                  | -74.44263                  | 203.6                      | 51.5                     |
| O4     | -74.68168           | 0.325113                | -74.36058                  | -74.44263                  | 202.1                      | 51.5                     |
| H5     | -0.29995            | 0.001306                | -0.27593                   | -0.29899                   | 15.4                       | 14.5                     |
| H6     | -0.29995            | 0.001306                | -0.27593                   | -0.29899                   | 14.5                       | 14.5                     |
| H7     | -0.45916            | 0.001999                | -0.42745                   | -0.45769                   | 19.8                       | 19.0                     |
| H8     | -0.45916            | 0.001999                | -0.42745                   | -0.45769                   | 20.0                       | 19.0                     |
| H9     | -0.45916            | 0.001999                | -0.42745                   | -0.45769                   | 20.3                       | 19.0                     |
| H10    | -0.45916            | 0.001999                | -0.42745                   | -0.45769                   | 19.8                       | 19.0                     |

<sup>a</sup>) Self-atomic energies are in au. Differences  $\Delta E_{\text{self}}^A = (E_{\text{self}}^A)_{\text{HF}} - (E_{\text{self}}^A)_{\text{CCSD/BBC1}}$  and relative errors  $\Delta_{\text{self}}^A = \text{Comput } E_{\text{self}}^A - \text{Expect } E_{\text{self}}^A$  are in kcal mol<sup>-1</sup>.

**Table S18.** Relative to the CCSD/BBC1 data, analysis of self-atomic energies computed for the **Lin** conformer of glycol B3LYP level.<sup>a</sup>

| Atom A | CCSD/BBC1           |                         | B3LYP                      |                            |                            |                          |
|--------|---------------------|-------------------------|----------------------------|----------------------------|----------------------------|--------------------------|
|        | $E_{\text{self}}^A$ | $E_{\text{self}}^A / E$ | Comput $E_{\text{self}}^A$ | Expect $E_{\text{self}}^A$ | $\Delta E_{\text{self}}^A$ | $\Delta_{\text{self}}^A$ |
| C1     | -37.36617           | 0.162667                | -37.43913                  | -37.46081                  | -45.8                      | 13.6                     |
| C2     | -37.36617           | 0.162667                | -37.43912                  | -37.46081                  | -45.8                      | 13.6                     |
| O3     | -74.68168           | 0.325113                | -74.86574                  | -74.87083                  | -115.5                     | 3.2                      |
| O4     | -74.68168           | 0.325113                | -74.86573                  | -74.87083                  | -115.5                     | 3.2                      |
| H5     | -0.29995            | 0.001306                | -0.29720                   | -0.30071                   | 1.7                        | 2.2                      |
| H6     | -0.29995            | 0.001306                | -0.29720                   | -0.30071                   | 1.7                        | 2.2                      |
| H7     | -0.45916            | 0.001999                | -0.45536                   | -0.46032                   | 2.4                        | 3.1                      |
| H8     | -0.45916            | 0.001999                | -0.45536                   | -0.46032                   | 2.4                        | 3.1                      |
| H9     | -0.45916            | 0.001999                | -0.45536                   | -0.46032                   | 2.4                        | 3.1                      |
| H10    | -0.45916            | 0.001999                | -0.45536                   | -0.46032                   | 2.4                        | 3.1                      |

<sup>a</sup>) Self-atomic energies are in au. Differences  $\Delta E_{\text{self}}^A = (E_{\text{self}}^A)_{\text{B3LYP}} - (E_{\text{self}}^A)_{\text{CCSD/BBC1}}$  and relative errors  $\Delta_{\text{self}}^A = \text{Comput } E_{\text{self}}^A - \text{Expect } E_{\text{self}}^A$  are in kcal mol<sup>-1</sup>.

**Table S19.** Relative to the CCSD/BBC1 data, analysis of self-atomic energies computed for the **Lin** conformer of glycol B3LYP-GD3 level.<sup>a</sup>

| Atom A | CCSD                |                         | B3LYP-GD3                  |                            |                            |                          |
|--------|---------------------|-------------------------|----------------------------|----------------------------|----------------------------|--------------------------|
|        | $E_{\text{self}}^A$ | $E_{\text{self}}^A / E$ | Comput $E_{\text{self}}^A$ | Expect $E_{\text{self}}^A$ | $\Delta E_{\text{self}}^A$ | $\Delta_{\text{self}}^A$ |
| C1     | -37.36617           | 0.162667                | -37.43910                  | -37.46157                  | -45.8                      | 14.1                     |
| C2     | -37.36617           | 0.162667                | -37.43910                  | -37.46157                  | -45.8                      | 14.1                     |
| O3     | -74.68168           | 0.325113                | -74.86644                  | -74.87236                  | -115.9                     | 3.7                      |
| O4     | -74.68168           | 0.325113                | -74.86645                  | -74.87236                  | -115.9                     | 3.7                      |
| H5     | -0.29995            | 0.001306                | -0.29719                   | -0.30072                   | 1.7                        | 2.2                      |
| H6     | -0.29995            | 0.001306                | -0.29719                   | -0.30072                   | 1.7                        | 2.2                      |
| H7     | -0.45916            | 0.001999                | -0.45535                   | -0.46033                   | 2.4                        | 3.1                      |
| H8     | -0.45916            | 0.001999                | -0.45535                   | -0.46033                   | 2.4                        | 3.1                      |
| H9     | -0.45916            | 0.001999                | -0.45535                   | -0.46033                   | 2.4                        | 3.1                      |
| H10    | -0.45916            | 0.001999                | -0.45535                   | -0.46033                   | 2.4                        | 3.1                      |

<sup>a</sup>) Self-atomic energies are in au. Differences  $\Delta E_{\text{self}}^A = (E_{\text{self}}^A)_{\text{B3LYP-GD3}} - (E_{\text{self}}^A)_{\text{CCSD/BBC1}}$  and relative errors  $\Delta_{\text{self}}^A = \text{Comput } E_{\text{self}}^A - \text{Expect } E_{\text{self}}^A$  are in kcal mol<sup>-1</sup>.

**Table S20.** Relative to the CCSD/BBC1 data, analysis of self-atomic energies computed for the **Lin** conformer of glycol MP2/Müller level.<sup>a</sup>

| Atom A | CCSD/BBC1           |                         | MP2/Müller                 |                            |                            |                          |
|--------|---------------------|-------------------------|----------------------------|----------------------------|----------------------------|--------------------------|
|        | $E_{\text{self}}^A$ | $E_{\text{self}}^A / E$ | Comput $E_{\text{self}}^A$ | Expect $E_{\text{self}}^A$ | $\Delta E_{\text{self}}^A$ | $\Delta_{\text{self}}^A$ |
| C1     | -37.36617           | 0.162667                | -37.40817                  | -37.36035                  | -26.4                      | -30.0                    |
| C2     | -37.36617           | 0.162667                | -37.40816                  | -37.36035                  | -26.4                      | -30.0                    |
| O3     | -74.68168           | 0.325113                | -74.75378                  | -74.67004                  | -45.2                      | -52.5                    |
| O4     | -74.68168           | 0.325113                | -74.75380                  | -74.67004                  | -45.3                      | -52.6                    |
| H5     | -0.29995            | 0.001306                | -0.29941                   | -0.29990                   | 0.3                        | 0.3                      |
| H6     | -0.29995            | 0.001306                | -0.29941                   | -0.29990                   | 0.3                        | 0.3                      |
| H7     | -0.45916            | 0.001999                | -0.46693                   | -0.45909                   | -4.9                       | -4.9                     |
| H8     | -0.45916            | 0.001999                | -0.46693                   | -0.45909                   | -4.9                       | -4.9                     |
| H9     | -0.45916            | 0.001999                | -0.46693                   | -0.45909                   | -4.9                       | -4.9                     |
| H10    | -0.45916            | 0.001999                | -0.46693                   | -0.45909                   | -4.9                       | -4.9                     |

<sup>a</sup>) Self-atomic energies are in au. Differences  $\Delta E_{\text{self}}^A = (E_{\text{self}}^A)_{\text{MP2/Müller}} - (E_{\text{self}}^A)_{\text{CCSD/BBC1}}$  and relative errors  $\Delta_{\text{self}}^A = \text{Comput } E_{\text{self}}^A - \text{Expect } E_{\text{self}}^A$  are in kcal mol<sup>-1</sup>.

**Table S21.** Relative to the CCSD/BBC1 data, analysis of self-atomic energies computed for the **Ecl** conformer of glycol at the HF level.<sup>a</sup>

| Atom A | CCSD/BBC1           |                         | HF                         |                            |                            |                          |
|--------|---------------------|-------------------------|----------------------------|----------------------------|----------------------------|--------------------------|
|        | $E_{\text{self}}^A$ | $E_{\text{self}}^A / E$ | Comput $E_{\text{self}}^A$ | Expect $E_{\text{self}}^A$ | $\Delta E_{\text{self}}^A$ | $\Delta_{\text{self}}^A$ |
| C1     | -37.36288           | 0.162663                | -37.11291                  | -37.24302                  | 156.9                      | 81.6                     |
| C2     | -37.36288           | 0.162663                | -37.11452                  | -37.24302                  | 155.8                      | 80.6                     |
| O3     | -74.68303           | 0.325140                | -74.35874                  | -74.44345                  | 203.5                      | 53.2                     |
| O4     | -74.68303           | 0.325140                | -74.35885                  | -74.44345                  | 203.4                      | 53.1                     |
| H5     | -0.30250            | 0.001317                | -0.27817                   | -0.30153                   | 15.3                       | 14.7                     |
| H6     | -0.30250            | 0.001317                | -0.27817                   | -0.30153                   | 15.3                       | 14.7                     |
| H7     | -0.45770            | 0.001993                | -0.42447                   | -0.45623                   | 20.9                       | 19.9                     |
| H8     | -0.45770            | 0.001993                | -0.42447                   | -0.45623                   | 20.9                       | 19.9                     |
| H9     | -0.45770            | 0.001993                | -0.42447                   | -0.45623                   | 20.9                       | 19.9                     |
| H10    | -0.45770            | 0.001993                | -0.42447                   | -0.45623                   | 20.9                       | 19.9                     |

<sup>a</sup>) Self-atomic energies are in au. Differences  $\Delta E_{\text{self}}^A = (E_{\text{self}}^A)_{\text{HF}} - (E_{\text{self}}^A)_{\text{CCSD/BBC1}}$  and relative errors  $\Delta_{\text{self}}^A = \text{Comput } E_{\text{self}}^A - \text{Expect } E_{\text{self}}^A$  are in kcal mol<sup>-1</sup>.

**Table S22.** Relative to the CCSD/BBC1 data, analysis of self-atomic energies computed for the **Ecl** conformer of glycol at the B3LYP level.<sup>a</sup>

| Atom A | CCSD/BBC1           |                         | B3LYP                      |                            |                            |                          |
|--------|---------------------|-------------------------|----------------------------|----------------------------|----------------------------|--------------------------|
|        | $E_{\text{self}}^A$ | $E_{\text{self}}^A / E$ | Comput $E_{\text{self}}^A$ | Expect $E_{\text{self}}^A$ | $\Delta E_{\text{self}}^A$ | $\Delta_{\text{self}}^A$ |
| C1     | -37.36288           | 0.162663                | -37.43459                  | -37.45758                  | -45.0                      | 14.4                     |
| C2     | -37.36288           | 0.162663                | -37.43510                  | -37.45758                  | -45.3                      | 14.1                     |
| O3     | -74.68303           | 0.325140                | -74.86393                  | -74.87233                  | -113.5                     | 5.3                      |
| O4     | -74.68303           | 0.325140                | -74.86403                  | -74.87233                  | -113.6                     | 5.2                      |
| H5     | -0.30250            | 0.001317                | -0.29928                   | -0.30326                   | 2.0                        | 2.5                      |
| H6     | -0.30250            | 0.001317                | -0.29928                   | -0.30326                   | 2.0                        | 2.5                      |
| H7     | -0.45770            | 0.001993                | -0.45428                   | -0.45886                   | 2.1                        | 2.9                      |
| H8     | -0.45770            | 0.001993                | -0.45428                   | -0.45886                   | 2.1                        | 2.9                      |
| H9     | -0.45770            | 0.001993                | -0.45428                   | -0.45886                   | 2.1                        | 2.9                      |
| H10    | -0.45770            | 0.001993                | -0.45428                   | -0.45886                   | 2.1                        | 2.9                      |

<sup>a</sup>) Self-atomic energies are in au. Differences  $\Delta E_{\text{self}}^A = (E_{\text{self}}^A)_{\text{B3LYP}} - (E_{\text{self}}^A)_{\text{CCSD/BBC1}}$  and relative errors  $\Delta_{\text{self}}^A = \text{Comput } E_{\text{self}}^A - \text{Expect } E_{\text{self}}^A$  are in kcal mol<sup>-1</sup>.

**Table S23.** Relative to the CCSD/BBC1 data, analysis of self-atomic energies computed for the **Ecl** conformer of glycol at the B3LYP-GD3 level.<sup>a</sup>

| Atom A | CCSD/BBC1           |                         | B3LYP-GD3                  |                            |                            |                          |
|--------|---------------------|-------------------------|----------------------------|----------------------------|----------------------------|--------------------------|
|        | $E_{\text{self}}^A$ | $E_{\text{self}}^A / E$ | Comput $E_{\text{self}}^A$ | Expect $E_{\text{self}}^A$ | $\Delta E_{\text{self}}^A$ | $\Delta_{\text{self}}^A$ |
| C1     | -37.36288           | 0.162663                | -37.43546                  | -37.45825                  | -45.5                      | 14.3                     |
| C2     | -37.36288           | 0.162663                | -37.43603                  | -37.45825                  | -45.9                      | 13.9                     |
| O3     | -74.68303           | 0.325140                | -74.86451                  | -74.87366                  | -113.9                     | 5.7                      |
| O4     | -74.68303           | 0.325140                | -74.86454                  | -74.87366                  | -113.9                     | 5.7                      |
| H5     | -0.30250            | 0.001317                | -0.29924                   | -0.30327                   | 2.0                        | 2.5                      |
| H6     | -0.30250            | 0.001317                | -0.29924                   | -0.30327                   | 2.0                        | 2.5                      |
| H7     | -0.45770            | 0.001993                | -0.45432                   | -0.45887                   | 2.1                        | 2.9                      |
| H8     | -0.45770            | 0.001993                | -0.45432                   | -0.45887                   | 2.1                        | 2.9                      |
| H9     | -0.45770            | 0.001993                | -0.45432                   | -0.45887                   | 2.1                        | 2.9                      |
| H10    | -0.45770            | 0.001993                | -0.45432                   | -0.45887                   | 2.1                        | 2.9                      |

<sup>a</sup>) Self-atomic energies are in au. Differences  $\Delta E_{\text{self}}^A = (E_{\text{self}}^A)_{\text{B3LYP-GD3}} - (E_{\text{self}}^A)_{\text{CCSD/BBC1}}$  and relative errors  $\Delta_{\text{self}}^A = \text{Comput } E_{\text{self}}^A - \text{Expect } E_{\text{self}}^A$  are in kcal mol<sup>-1</sup>.

**Table S24.** Relative to the CCSD/BBC1 data, analysis of self-atomic energies computed for the **Ecl** conformer of glycol at the MP2/Müller level.<sup>a</sup>

| Atom A | CCSD/BBC1           |                         | MP2/Müller                 |                            |                            |                          |
|--------|---------------------|-------------------------|----------------------------|----------------------------|----------------------------|--------------------------|
|        | $E_{\text{self}}^A$ | $E_{\text{self}}^A / E$ | Comput $E_{\text{self}}^A$ | Expect $E_{\text{self}}^A$ | $\Delta E_{\text{self}}^A$ | $\Delta_{\text{self}}^A$ |
| C1     | -37.36288           | 0.162663                | -37.40361                  | -37.35702                  | -25.6                      | -29.2                    |
| C2     | -37.36288           | 0.162663                | -37.40376                  | -37.35702                  | -25.7                      | -29.3                    |
| O3     | -74.68303           | 0.325140                | -74.75437                  | -74.67132                  | -44.8                      | -52.1                    |
| O4     | -74.68303           | 0.325140                | -74.75416                  | -74.67132                  | -44.6                      | -52.0                    |
| H5     | -0.30250            | 0.001317                | -0.30231                   | -0.30245                   | 0.1                        | 0.1                      |
| H6     | -0.30250            | 0.001317                | -0.30230                   | -0.30245                   | 0.1                        | 0.1                      |
| H7     | -0.45770            | 0.001993                | -0.46590                   | -0.45763                   | -5.1                       | -5.2                     |
| H8     | -0.45770            | 0.001993                | -0.46590                   | -0.45763                   | -5.1                       | -5.2                     |
| H9     | -0.45770            | 0.001993                | -0.46590                   | -0.45763                   | -5.1                       | -5.2                     |
| H10    | -0.45770            | 0.001993                | -0.46591                   | -0.45763                   | -5.1                       | -5.2                     |

<sup>a</sup>) Self-atomic energies are in au. Differences  $\Delta E_{\text{self}}^A = (E_{\text{self}}^A)_{\text{MP2/Müller}} - (E_{\text{self}}^A)_{\text{CCSD/BBC1}}$  and relative errors  $\Delta_{\text{self}}^A = \text{Comput } E_{\text{self}}^A - \text{Expect } E_{\text{self}}^A$  are in kcal mol<sup>-1</sup>.



From data in Tables S13-S24, several general trends are observed, namely:

(1) Considering absolute values of differences in the computed self-atomic energies,  $\Delta E_{\text{self}}^{\text{A}} = (E_{\text{self}}^{\text{A}})_{\text{LoT}} - (E_{\text{self}}^{\text{A}})_{\text{CCSD/BBC1}}$ , we found the following trend  $|\Delta E_{\text{self}}^{\text{O}}| > |\Delta E_{\text{self}}^{\text{C}}| \gg |\Delta E_{\text{self}}^{\text{H}}|$ . Typically,  $|\Delta E_{\text{self}}^{\text{A}}| \gg |\Delta_{\text{self}}^{\text{A}}|$  for O- and C-atoms, but differences and relative errors computed for H-atoms are comparable.

(2) The self-atomic energies computed at B3LYP and B3LYP/GD3 for O- and C-atoms are systematically larger (more negative) than the CCSD/BBC1 values; hence  $\Delta E_{\text{self}}^{\text{A}} < 0$ . In reality, however, B3LYP generates underestimated self-atomic energies of O- and C-atoms resulting in  $\Delta_{\text{self}}^{\text{A}} > 0$ . Self-atomic energies of H-atoms are slightly underestimated ( $\Delta E_{\text{self}}^{\text{A}}$  and  $\Delta_{\text{self}}^{\text{A}}$  values are small and positive).

(3) There is no change in sign at HF; all  $\Delta E_{\text{self}}^{\text{A}}$  and  $\Delta_{\text{self}}^{\text{A}}$  values are positive; self-atomic energies of all atoms are being under-estimated.

(4) There is no change in sign at MP2/Müller and, except H3 and H5, all  $\Delta E_{\text{self}}^{\text{A}}$  and  $\Delta_{\text{self}}^{\text{A}}$  values are negative hence they were overestimated.

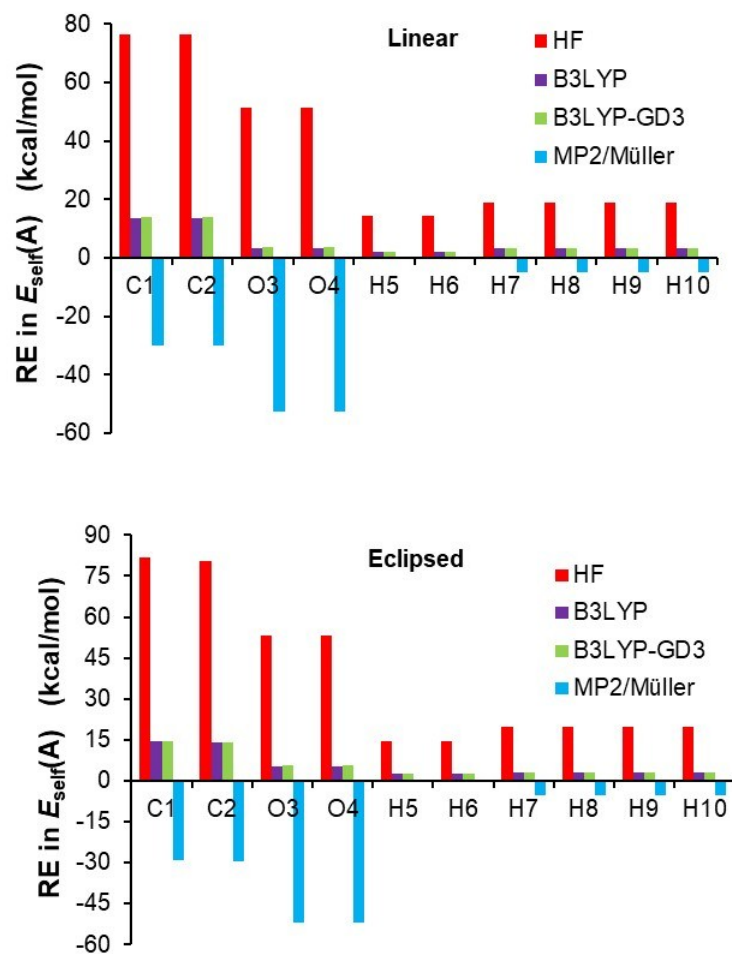

**Figure S5.** Using CCSD/BBC1 data as a reference, relative errors (RE) in computed self-atomic energies of the eclipsed and linear conformers of glycol at the indicated levels of theory.

**Table S25.** Part (a) shows a full set of interaction energies,  $E_{\text{int}}^{\text{A,B}}$ , computed for all 45 unique atom-pairs in the **Lin** and **LEC** conformers of glycol and changes in these interaction energies,  $\Delta E_{\text{int}}^{\text{A,B}}$ , on the **Lin**  $\rightarrow$  **LEC** structural change. In addition and for convenience of interpretation, the atom pairs are also provided in the ascending order of the computed  $\Delta E_{\text{int}}^{\text{A,B}}$  values (from most negative to most positive values) in Part (b). All values are in kcal mol<sup>-1</sup> and were obtained at the CCSD/BBC1 level.

| Part (a) |     |                               |         |                                      | Part (b) |     |                                      |
|----------|-----|-------------------------------|---------|--------------------------------------|----------|-----|--------------------------------------|
| Atom     |     | LEC                           | Lin     | Lin $\rightarrow$ LEC                | Atom     |     | Lin $\rightarrow$ LEC                |
| A        | B   | $E_{\text{int}}^{\text{A,B}}$ |         | $\Delta E_{\text{int}}^{\text{A,B}}$ | A        | B   | $\Delta E_{\text{int}}^{\text{A,B}}$ |
| C1       | C2  | -91.19                        | -89.87  | -1.32                                | O4       | H6  | -40.52                               |
| C1       | O3  | -98.68                        | -91.80  | -6.88                                | O3       | H5  | -13.10                               |
| C1       | O4  | -363.14                       | -370.62 | 7.49                                 | C2       | O4  | -10.63                               |
| C1       | H5  | 78.29                         | 80.84   | -2.55                                | C2b      | O3  | -7.96                                |
| C1       | H6  | 47.76                         | 34.65   | 13.11                                | C1       | O3  | -6.88                                |
| C1       | H7  | -137.40                       | -137.72 | 0.32                                 | O3b      | H6  | -4.36                                |
| C1       | H8  | -3.92                         | -4.93   | 1.00                                 | C1       | H5  | -2.55                                |
| C1       | H9  | -138.87                       | -137.72 | -1.15                                | O3       | H8  | -2.48                                |
| C1       | H10 | -5.06                         | -4.93   | -0.13                                | O4b      | H5  | -2.09                                |
| C2       | O3  | -378.58                       | -370.62 | -7.96                                | O4       | H8  | -2.08                                |
| C2       | O4  | -102.42                       | -91.80  | -10.63                               | C1       | C2  | -1.32                                |
| C2       | H5  | 38.67                         | 34.65   | 4.02                                 | C1       | H9  | -1.15                                |
| C2       | H6  | 85.16                         | 80.84   | 4.31                                 | O3       | H10 | -0.75                                |
| C2       | H7  | -4.58                         | -4.93   | 0.34                                 | O3       | H7  | -0.58                                |
| C2       | H8  | -135.62                       | -137.72 | 2.10                                 | O4       | H7  | -0.50                                |
| C2       | H9  | -5.06                         | -4.93   | -0.14                                | O3       | H9  | -0.36                                |
| C2       | H10 | -136.84                       | -137.72 | 0.88                                 | H5       | H9  | -0.36                                |
| O3       | O4  | 137.08                        | 103.17  | 33.90                                | C2       | H9  | -0.14                                |
| O3       | H5  | -63.47                        | -50.37  | -13.10                               | C1       | H10 | -0.13                                |
| O3       | H6  | -318.71                       | -314.35 | -4.36                                | O4       | H10 | -0.12                                |
| O3       | H7  | 1.53                          | 2.11    | -0.58                                | H7       | H10 | -0.09                                |
| O3       | H8  | -6.44                         | -3.97   | -2.48                                | H5       | H7  | -0.07                                |
| O3       | H9  | 1.74                          | 2.11    | -0.36                                | H5       | H10 | 0.03                                 |
| O3       | H10 | -4.72                         | -3.97   | -0.75                                | H6       | H7  | 0.03                                 |
| O4       | H5  | -316.44                       | -314.35 | -2.09                                | H8       | H10 | 0.12                                 |
| O4       | H6  | -90.89                        | -50.37  | -40.52                               | H8       | H9  | 0.14                                 |
| O4       | H7  | -4.46                         | -3.97   | -0.50                                | H7       | H8  | 0.14                                 |
| O4       | H8  | 0.02                          | 2.11    | -2.08                                | H7       | H9  | 0.19                                 |
| O4       | H9  | -3.22                         | -3.97   | 0.75                                 | H9       | H10 | 0.31                                 |
| O4       | H10 | 1.98                          | 2.11    | -0.12                                | H6       | H10 | 0.32                                 |

Table S25 continues.

| Part (a) |     |                               |       |                                      | Part (b) |     |                                      |
|----------|-----|-------------------------------|-------|--------------------------------------|----------|-----|--------------------------------------|
| Atom     |     | LEC                           | Lin   | Lin → LEC                            | Atom     |     | Lin → LEC                            |
| A        | B   | $E_{\text{int}}^{\text{A,B}}$ |       | $\Delta E_{\text{int}}^{\text{A,B}}$ | A        | B   | $\Delta E_{\text{int}}^{\text{A,B}}$ |
| H5       | H6  | 36.97                         | 22.72 | 14.24                                | H6       | H9  | 0.32                                 |
| H5       | H7  | -1.91                         | -1.84 | -0.07                                | C1       | H7  | 0.32                                 |
| H5       | H8  | -0.65                         | -1.82 | 1.16                                 | C2       | H7  | 0.34                                 |
| H5       | H9  | -2.20                         | -1.84 | -0.36                                | O4       | H9  | 0.75                                 |
| H5       | H10 | -1.79                         | -1.82 | 0.03                                 | C2       | H10 | 0.88                                 |
| H6       | H7  | -1.78                         | -1.82 | 0.03                                 | C1       | H8  | 1.00                                 |
| H6       | H8  | -0.43                         | -1.84 | 1.41                                 | H5       | H8  | 1.16                                 |
| H6       | H9  | -1.50                         | -1.82 | 0.32                                 | H6       | H8  | 1.41                                 |
| H6       | H10 | -1.52                         | -1.84 | 0.32                                 | C2b      | H8  | 2.10                                 |
| H7       | H8  | -0.42                         | -0.57 | 0.14                                 | C2       | H5  | 4.02                                 |
| H7       | H9  | -2.32                         | -2.51 | 0.19                                 | C2       | H6  | 4.31                                 |
| H7       | H10 | -0.55                         | -0.46 | -0.09                                | C1b      | O4  | 7.49                                 |
| H8       | H9  | -0.32                         | -0.46 | 0.14                                 | C1       | H6  | 13.11                                |
| H8       | H10 | -2.38                         | -2.51 | 0.12                                 | H5       | H6  | 14.24                                |
| H9       | H10 | -0.25                         | -0.57 | 0.31                                 | O3       | O4  | 33.90                                |

**Table S26.** Part (a) shows a full set of classical component,  $V_{cl}^{A,B}$ , of interaction energies computed for all 45 unique atom-pairs in the **Lin** and **LEC** conformers of glycol and changes in the classical component,  $\Delta V_{cl}^{A,B}$ , on the **Lin**  $\rightarrow$  **LEC** structural change. In addition and for convenience of interpretation, the atom pairs are also provided in the ascending order of the computed  $\Delta V_{cl}^{A,B}$  values (from most negative to most positive values) in Part (b). All values are in kcal mol<sup>-1</sup> and were obtained at the CCSD/BBC1 level.

| Part (a) |     |                |         |                       | Part (b) |     |                       |
|----------|-----|----------------|---------|-----------------------|----------|-----|-----------------------|
| Atom     |     | LEC            | Lin     | Lin $\rightarrow$ LEC | Atom     |     | Lin $\rightarrow$ LEC |
| A        | B   | $V_{cl}^{A,B}$ |         | $\Delta V_{cl}^{A,B}$ | A        | B   | $\Delta V_{cl}^{A,B}$ |
| C1       | C2  | 78.34          | 78.42   | -0.07                 | O4       | H6  | -37.99                |
| C1       | O3  | -88.27         | -80.85  | -7.42                 | O3       | H5  | -13.25                |
| C1       | O4  | -209.58        | -215.79 | 6.21                  | C2       | O4  | -11.39                |
| C1       | H5  | 79.50          | 82.17   | -2.67                 | O3       | H6  | -8.24                 |
| C1       | H6  | 48.29          | 35.15   | 13.14                 | C1       | O3  | -7.42                 |
| C1       | H7  | 19.68          | 19.26   | 0.43                  | C2       | O3  | -5.42                 |
| C1       | H8  | 0.12           | -1.14   | 1.26                  | O4       | H8  | -3.18                 |
| C1       | H9  | 18.41          | 19.26   | -0.85                 | C1       | H5  | -2.67                 |
| C1       | H10 | -1.10          | -1.14   | 0.04                  | O3       | H8  | -2.31                 |
| C2       | O3  | -221.21        | -215.79 | -5.42                 | O4       | H5  | -1.78                 |
| C2       | O4  | -92.24         | -80.85  | -11.39                | O3       | H9  | -1.19                 |
| C2       | H5  | 39.11          | 35.15   | 3.96                  | C1       | H9  | -0.85                 |
| C2       | H6  | 86.47          | 82.17   | 4.30                  | O3       | H7  | -0.54                 |
| C2       | H7  | -0.83          | -1.14   | 0.30                  | O3       | H10 | -0.43                 |
| C2       | H8  | 21.87          | 19.26   | 2.61                  | H5       | H9  | -0.37                 |
| C2       | H9  | -1.27          | -1.14   | -0.13                 | O4       | H7  | -0.32                 |
| C2       | H10 | 19.50          | 19.26   | 0.24                  | H7       | H10 | -0.13                 |
| O3       | O4  | 146.25         | 108.94  | 37.31                 | C2       | H9  | -0.13                 |
| O3       | H5  | -63.12         | -49.87  | -13.25                | O4       | H10 | -0.10                 |
| O3       | H6  | -204.52        | -196.27 | -8.24                 | C1       | C2  | -0.07                 |
| O3       | H7  | 3.53           | 4.07    | -0.54                 | H8       | H10 | 0.00                  |
| O3       | H8  | -0.18          | 2.14    | -2.31                 | H5       | H7  | 0.01                  |
| O3       | H9  | 2.88           | 4.07    | -1.19                 | H7       | H9  | 0.02                  |
| O3       | H10 | 1.70           | 2.14    | -0.43                 | C1       | H10 | 0.04                  |
| O4       | H5  | -198.05        | -196.27 | -1.78                 | H8       | H9  | 0.05                  |
| O4       | H6  | -87.85         | -49.87  | -37.99                | H5       | H10 | 0.07                  |
| O4       | H7  | 1.81           | 2.14    | -0.32                 | H6       | H7  | 0.09                  |
| O4       | H8  | 0.88           | 4.07    | -3.18                 | H7       | H8  | 0.12                  |
| O4       | H9  | 3.29           | 2.14    | 1.15                  | H9       | H10 | 0.22                  |
| O4       | H10 | 3.97           | 4.07    | -0.10                 | C2       | H10 | 0.24                  |

**Table S26** continues.

| Part (a) |     |                |       |                       | Part (b) |     |                       |
|----------|-----|----------------|-------|-----------------------|----------|-----|-----------------------|
| Atom     |     | LEC            | Lin   | Lin → LEC             | Atom     |     | Lin → LEC             |
| A        | B   | $V_{cl}^{A,B}$ |       | $\Delta V_{cl}^{A,B}$ | A        | B   | $\Delta V_{cl}^{A,B}$ |
| H5       | H6  | 37.09          | 22.91 | 14.18                 | C2       | H7  | 0.30                  |
| H5       | H7  | -1.73          | -1.74 | 0.01                  | H6       | H10 | 0.35                  |
| H5       | H8  | -0.59          | -1.78 | 1.19                  | H6       | H9  | 0.38                  |
| H5       | H9  | -2.11          | -1.74 | -0.37                 | C1       | H7  | 0.43                  |
| H5       | H10 | -1.71          | -1.78 | 0.07                  | O4       | H9  | 1.15                  |
| H6       | H7  | -1.70          | -1.78 | 0.09                  | H5       | H8  | 1.19                  |
| H6       | H8  | -0.08          | -1.74 | 1.66                  | C1       | H8  | 1.26                  |
| H6       | H9  | -1.41          | -1.78 | 0.38                  | H6       | H8  | 1.66                  |
| H6       | H10 | -1.38          | -1.74 | 0.35                  | C2       | H8  | 2.61                  |
| H7       | H8  | 0.20           | 0.08  | 0.12                  | C2       | H5  | 3.96                  |
| H7       | H9  | 0.69           | 0.67  | 0.02                  | C2       | H6  | 4.30                  |
| H7       | H10 | 0.08           | 0.21  | -0.13                 | C1       | O4  | 6.21                  |
| H8       | H9  | 0.26           | 0.21  | 0.05                  | C1       | H6  | 13.14                 |
| H8       | H10 | 0.67           | 0.67  | 0.00                  | H5       | H6  | 14.18                 |
| H9       | H10 | 0.30           | 0.08  | 0.22                  | O3       | O4  | 37.31                 |

**Table S27.** Part (a) shows a full set of the XC-term,  $V_{XC}^{A,B}$ , of interaction energies computed for all 45 unique atom-pairs in the **Lin** and **LEC** conformers of glycol and changes in the XC-term,  $\Delta V_{XC}^{A,B}$ , on the **Lin**  $\rightarrow$  **LEC** structural change. In addition and for convenience of interpretation, the atom pairs are also provided in the ascending order of the computed  $\Delta V_{XC}^{A,B}$  values (from most negative to most positive values) in Part (b). All values are in kcal mol<sup>-1</sup> and were obtained at the CCSD/BBC1 level.

| Part (a) |     |                |         |                       | Part (b) |     |                       |
|----------|-----|----------------|---------|-----------------------|----------|-----|-----------------------|
| Atom     |     | LEC            | Lin     | Lin $\rightarrow$ LEC | Atom     |     | Lin $\rightarrow$ LEC |
| A        | B   | $V_{XC}^{A,B}$ |         | $\Delta V_{XC}^{A,B}$ | A        | B   | $\Delta V_{XC}^{A,B}$ |
| C1       | C2  | -169.54        | -168.29 | -1.25                 | O3       | O4  | -3.41                 |
| C1       | O3  | -10.41         | -10.95  | 0.54                  | C2       | O3  | -2.54                 |
| C1       | O4  | -153.56        | -154.83 | 1.27                  | O4       | H6  | -2.53                 |
| C1       | H5  | -1.21          | -1.32   | 0.11                  | C1       | C2  | -1.25                 |
| C1       | H6  | -0.53          | -0.50   | -0.04                 | C2       | H8  | -0.51                 |
| C1       | H7  | -157.08        | -156.98 | -0.10                 | O4       | H9  | -0.40                 |
| C1       | H8  | -4.04          | -3.79   | -0.26                 | O3       | H10 | -0.32                 |
| C1       | H9  | -157.27        | -156.98 | -0.29                 | O4       | H5  | -0.32                 |
| C1       | H10 | -3.96          | -3.79   | -0.17                 | C1       | H9  | -0.29                 |
| C2       | O3  | -157.37        | -154.83 | -2.54                 | C1       | H8  | -0.26                 |
| C2       | O4  | -10.19         | -10.95  | 0.76                  | H6       | H8  | -0.24                 |
| C2       | H5  | -0.44          | -0.50   | 0.05                  | O4       | H7  | -0.17                 |
| C2       | H6  | -1.31          | -1.32   | 0.01                  | C1       | H10 | -0.17                 |
| C2       | H7  | -3.75          | -3.79   | 0.04                  | O3       | H8  | -0.16                 |
| C2       | H8  | -157.49        | -156.98 | -0.51                 | C1       | H7  | -0.10                 |
| C2       | H9  | -3.79          | -3.79   | -0.01                 | H5       | H7  | -0.07                 |
| C2       | H10 | -156.34        | -156.98 | 0.64                  | H6       | H7  | -0.06                 |
| O3       | O4  | -9.17          | -5.77   | -3.41                 | H6       | H9  | -0.06                 |
| O3       | H5  | -0.35          | -0.50   | 0.15                  | H5       | H10 | -0.04                 |
| O3       | H6  | -114.19        | -118.07 | 3.88                  | O3       | H7  | -0.04                 |
| O3       | H7  | -2.00          | -1.96   | -0.04                 | C1       | H6  | -0.04                 |
| O3       | H8  | -6.27          | -6.10   | -0.16                 | H6       | H10 | -0.03                 |
| O3       | H9  | -1.14          | -1.96   | 0.82                  | H5       | H8  | -0.03                 |
| O3       | H10 | -6.42          | -6.10   | -0.32                 | O4       | H10 | -0.03                 |
| O4       | H5  | -118.39        | -118.07 | -0.32                 | C2       | H9  | -0.01                 |
| O4       | H6  | -3.03          | -0.50   | -2.53                 | C2       | H6  | 0.01                  |
| O4       | H7  | -6.28          | -6.10   | -0.17                 | H5       | H9  | 0.01                  |
| O4       | H8  | -0.86          | -1.96   | 1.10                  | H7       | H8  | 0.02                  |
| O4       | H9  | -6.50          | -6.10   | -0.40                 | C2       | H7  | 0.04                  |
| O4       | H10 | -1.99          | -1.96   | -0.03                 | H7       | H10 | 0.04                  |

**Table S27** continues.

| Part (a) |     |                |       |                       | Part (b) |     |                       |
|----------|-----|----------------|-------|-----------------------|----------|-----|-----------------------|
| Atom     |     | LEC            | Lin   | Lin → LEC             | Atom     |     | Lin → LEC             |
| A        | B   | $V_{XC}^{A,B}$ |       | $\Delta V_{XC}^{A,B}$ | A        | B   | $\Delta V_{XC}^{A,B}$ |
| H5       | H6  | -0.12          | -0.19 | 0.07                  | C2       | H5  | 0.05                  |
| H5       | H7  | -0.18          | -0.11 | -0.07                 | H5       | H6  | 0.07                  |
| H5       | H8  | -0.06          | -0.03 | -0.03                 | H8       | H9  | 0.09                  |
| H5       | H9  | -0.09          | -0.11 | 0.01                  | H9       | H10 | 0.09                  |
| H5       | H10 | -0.08          | -0.03 | -0.04                 | C1       | H5  | 0.11                  |
| H6       | H7  | -0.09          | -0.03 | -0.06                 | H8       | H10 | 0.12                  |
| H6       | H8  | -0.35          | -0.11 | -0.24                 | O3       | H5  | 0.15                  |
| H6       | H9  | -0.09          | -0.03 | -0.06                 | H7       | H9  | 0.17                  |
| H6       | H10 | -0.14          | -0.11 | -0.03                 | C1       | O3  | 0.54                  |
| H7       | H8  | -0.62          | -0.64 | 0.02                  | C2       | H10 | 0.64                  |
| H7       | H9  | -3.01          | -3.18 | 0.17                  | C2       | O4  | 0.76                  |
| H7       | H10 | -0.63          | -0.67 | 0.04                  | O3       | H9  | 0.82                  |
| H8       | H9  | -0.59          | -0.67 | 0.09                  | O4       | H8  | 1.10                  |
| H8       | H10 | -3.05          | -3.18 | 0.12                  | C1       | O4  | 1.27                  |
| H9       | H10 | -0.55          | -0.64 | 0.09                  | O3       | H6  | 3.88                  |



**Table S28.** Part (a) shows a full set of interaction energies,  $E_{\text{int}}^{\text{A,B}}$ , computed for all 45 unique atom-pairs in the **Lin** and **Ecl** conformers of glycol and changes in these interaction energies,  $\Delta E_{\text{int}}^{\text{A,B}}$ , on the **Lin**  $\rightarrow$  **Ecl** structural change. In addition and for convenience of interpretation, the atom pairs are also provided in the ascending order of the computed  $\Delta E_{\text{int}}^{\text{A,B}}$  values (from most negative to most positive values) in Part (b). All values are in kcal mol<sup>-1</sup> and were obtained at the CCSD/BBC1 level.

| Part (a) |     |                               |         |                                      | Part (b) |     |                                      |
|----------|-----|-------------------------------|---------|--------------------------------------|----------|-----|--------------------------------------|
| Atom     |     | Ecl                           | Lin     | Lin $\rightarrow$ Ecl                | Atom     |     | Lin $\rightarrow$ Ecl                |
| A        | B   | $E_{\text{int}}^{\text{A,B}}$ |         | $\Delta E_{\text{int}}^{\text{A,B}}$ | A        | B   | $\Delta E_{\text{int}}^{\text{A,B}}$ |
| C1       | C2  | -81.00                        | -89.87  | 8.88                                 | O3       | H5  | -9.06                                |
| C1       | O3  | -97.02                        | -91.80  | -5.23                                | O4       | H6  | -9.06                                |
| C1       | O4  | -372.06                       | -370.62 | -1.43                                | C1       | O3  | -5.23                                |
| C1       | H5  | 82.40                         | 80.84   | 1.56                                 | C2       | O4  | -5.23                                |
| C1       | H6  | 37.71                         | 34.65   | 3.06                                 | C1       | H7  | -3.58                                |
| C1       | H7  | -141.30                       | -137.72 | -3.58                                | C1       | H9  | -3.58                                |
| C1       | H8  | -6.60                         | -4.93   | -1.68                                | C2       | H8  | -3.58                                |
| C1       | H9  | -141.30                       | -137.72 | -3.58                                | C2       | H10 | -3.58                                |
| C1       | H10 | -6.60                         | -4.93   | -1.68                                | C1       | H8  | -1.68                                |
| C2       | O3  | -372.06                       | -370.62 | -1.43                                | C1       | H10 | -1.68                                |
| C2       | O4  | -97.02                        | -91.80  | -5.23                                | C2       | H7  | -1.68                                |
| C2       | H5  | 37.71                         | 34.65   | 3.06                                 | C2       | H9  | -1.68                                |
| C2       | H6  | 82.40                         | 80.84   | 1.56                                 | H5       | H7  | -1.53                                |
| C2       | H7  | -6.60                         | -4.93   | -1.68                                | H5       | H9  | -1.53                                |
| C2       | H8  | -141.30                       | -137.72 | -3.58                                | H6       | H8  | -1.53                                |
| C2       | H9  | -6.60                         | -4.93   | -1.68                                | H6       | H10 | -1.53                                |
| C2       | H10 | -141.30                       | -137.72 | -3.58                                | C1       | O4  | -1.43                                |
| O3       | O4  | 121.19                        | 103.17  | 18.02                                | C2       | O3  | -1.43                                |
| O3       | H5  | -59.43                        | -50.37  | -9.06                                | H5       | H8  | -0.41                                |
| O3       | H6  | -309.99                       | -314.35 | 4.36                                 | H5       | H10 | -0.41                                |
| O3       | H7  | 3.69                          | 2.11    | 1.59                                 | H6       | H7  | -0.41                                |
| O3       | H8  | -1.45                         | -3.97   | 2.51                                 | H6       | H9  | -0.41                                |
| O3       | H9  | 3.69                          | 2.11    | 1.59                                 | H7       | H8  | -0.32                                |
| O3       | H10 | -1.45                         | -3.97   | 2.51                                 | H9       | H10 | -0.32                                |
| O4       | H5  | -309.99                       | -314.35 | 4.36                                 | H7       | H9  | -0.14                                |
| O4       | H6  | -59.43                        | -50.37  | -9.06                                | H8       | H10 | -0.14                                |
| O4       | H7  | -1.45                         | -3.97   | 2.51                                 | H7       | H10 | 0.21                                 |
| O4       | H8  | 3.69                          | 2.11    | 1.59                                 | H8       | H9  | 0.21                                 |
| O4       | H9  | -1.45                         | -3.97   | 2.51                                 | C1       | H5  | 1.56                                 |
| O4       | H10 | 3.69                          | 2.11    | 1.59                                 | C2       | H6  | 1.56                                 |

**Table S28** continues.

| Part (a) |     |                               |       |                                      | Part (b) |     |                                      |
|----------|-----|-------------------------------|-------|--------------------------------------|----------|-----|--------------------------------------|
| Atom     |     | Ecl                           | Lin   | Lin → Ecl                            | Atom     |     | Lin → Ecl                            |
| A        | B   | $E_{\text{int}}^{\text{A,B}}$ |       | $\Delta E_{\text{int}}^{\text{A,B}}$ | A        | B   | $\Delta E_{\text{int}}^{\text{A,B}}$ |
| H5       | H6  | 25.93                         | 22.72 | 3.21                                 | O3       | H7  | 1.59                                 |
| H5       | H7  | -3.37                         | -1.84 | -1.53                                | O3       | H9  | 1.59                                 |
| H5       | H8  | -2.23                         | -1.82 | -0.41                                | O4       | H8  | 1.59                                 |
| H5       | H9  | -3.37                         | -1.84 | -1.53                                | O4       | H10 | 1.59                                 |
| H5       | H10 | -2.23                         | -1.82 | -0.41                                | O3       | H8  | 2.51                                 |
| H6       | H7  | -2.23                         | -1.82 | -0.41                                | O3       | H10 | 2.51                                 |
| H6       | H8  | -3.37                         | -1.84 | -1.53                                | O4       | H7  | 2.51                                 |
| H6       | H9  | -2.23                         | -1.82 | -0.41                                | O4       | H9  | 2.51                                 |
| H6       | H10 | -3.37                         | -1.84 | -1.53                                | C1       | H6  | 3.06                                 |
| H7       | H8  | -0.88                         | -0.57 | -0.32                                | C2       | H5  | 3.06                                 |
| H7       | H9  | -2.65                         | -2.51 | -0.14                                | H5       | H6  | 3.21                                 |
| H7       | H10 | -0.25                         | -0.46 | 0.21                                 | O3       | H6  | 4.36                                 |
| H8       | H9  | -0.25                         | -0.46 | 0.21                                 | O4       | H5  | 4.36                                 |
| H8       | H10 | -2.65                         | -2.51 | -0.14                                | C1       | C2  | 8.88                                 |
| H9       | H10 | -0.88                         | -0.57 | -0.32                                | O3       | O4  | 18.02                                |

**Table S29.** Part (a) shows a full set of classical component,  $V_{cl}^{A,B}$ , of interaction energies computed for all 45 unique atom-pairs in the **Ecl** and **Lin** conformers of glycol and changes in the classical component,  $\Delta V_{cl}^{A,B}$ , on the **Lin**  $\rightarrow$  **Ecl** structural change. In addition and for convenience of interpretation, the atom pairs are also provided in the ascending order of the computed  $\Delta V_{cl}^{A,B}$  values (from most negative to most positive values) in Part (b). All values are in kcal mol<sup>-1</sup> and were obtained at the CCSD/BBC1 level.

| Part (a) |     |                |         |                       | Part (b) |     |                       |
|----------|-----|----------------|---------|-----------------------|----------|-----|-----------------------|
| Atom     |     | Ecl            | Lin     | Lin $\rightarrow$ Ecl | Atom     |     | Lin $\rightarrow$ Ecl |
| A        | B   | $V_{cl}^{A,B}$ |         | $\Delta V_{cl}^{A,B}$ | A        | B   | $\Delta V_{cl}^{A,B}$ |
| C1       | C2  | 81.66          | 78.42   | 3.24                  | O3       | H5  | -8.90                 |
| C1       | O3  | -89.13         | -80.85  | -8.28                 | O4       | H6  | -8.90                 |
| C1       | O4  | -214.54        | -215.79 | 1.25                  | C1       | O3  | -8.28                 |
| C1       | H5  | 83.83          | 82.17   | 1.66                  | C2       | O4  | -8.28                 |
| C1       | H6  | 38.20          | 35.15   | 3.05                  | C1       | H7  | -3.24                 |
| C1       | H7  | 16.02          | 19.26   | -3.24                 | C1       | H9  | -3.24                 |
| C1       | H8  | -2.54          | -1.14   | -1.40                 | C2       | H8  | -3.24                 |
| C1       | H9  | 16.02          | 19.26   | -3.24                 | C2       | H10 | -3.24                 |
| C1       | H10 | -2.54          | -1.14   | -1.40                 | H5       | H7  | -1.49                 |
| C2       | O3  | -214.54        | -215.79 | 1.25                  | H5       | H9  | -1.49                 |
| C2       | O4  | -89.13         | -80.85  | -8.28                 | H6       | H8  | -1.49                 |
| C2       | H5  | 38.20          | 35.15   | 3.05                  | H6       | H10 | -1.49                 |
| C2       | H6  | 83.83          | 82.17   | 1.66                  | C1       | H8  | -1.40                 |
| C2       | H7  | -2.54          | -1.14   | -1.40                 | C1       | H10 | -1.40                 |
| C2       | H8  | 16.02          | 19.26   | -3.24                 | C2       | H7  | -1.40                 |
| C2       | H9  | -2.54          | -1.14   | -1.40                 | C2       | H9  | -1.40                 |
| C2       | H10 | 16.02          | 19.26   | -3.24                 | H5       | H8  | -0.41                 |
| O3       | O4  | 136.45         | 108.94  | 27.51                 | H5       | H10 | -0.41                 |
| O3       | H5  | -58.77         | -49.87  | -8.90                 | H6       | H7  | -0.41                 |
| O3       | H6  | -191.06        | -196.27 | 5.21                  | H6       | H9  | -0.41                 |
| O3       | H7  | 4.39           | 4.07    | 0.32                  | H7       | H10 | 0.04                  |
| O3       | H8  | 5.13           | 2.14    | 2.99                  | H8       | H9  | 0.04                  |
| O3       | H9  | 4.39           | 4.07    | 0.32                  | H7       | H9  | 0.13                  |
| O3       | H10 | 5.13           | 2.14    | 2.99                  | H8       | H10 | 0.13                  |
| O4       | H5  | -191.06        | -196.27 | 5.21                  | O3       | H7  | 0.32                  |
| O4       | H6  | -58.77         | -49.87  | -8.90                 | O3       | H9  | 0.32                  |
| O4       | H7  | 5.13           | 2.14    | 2.99                  | O4       | H8  | 0.32                  |
| O4       | H8  | 4.39           | 4.07    | 0.32                  | O4       | H10 | 0.32                  |
| O4       | H9  | 5.13           | 2.14    | 2.99                  | H7       | H8  | 0.50                  |
| O4       | H10 | 4.39           | 4.07    | 0.32                  | H9       | H10 | 0.50                  |

**Table S29** continues.

| Part (a) |     |                |       |                       | Part (b) |     |                       |
|----------|-----|----------------|-------|-----------------------|----------|-----|-----------------------|
| Atom     |     | Ecl            | Lin   | Lin → Ecl             | Atom     |     | Lin → Ecl             |
| A        | B   | $V_{cl}^{A,B}$ |       | $\Delta V_{cl}^{A,B}$ | A        | B   | $\Delta V_{cl}^{A,B}$ |
| H5       | H6  | 26.14          | 22.91 | 3.23                  | C1       | O4  | 1.25                  |
| H5       | H7  | -3.23          | -1.74 | -1.49                 | C2       | O3  | 1.25                  |
| H5       | H8  | -2.19          | -1.78 | -0.41                 | C1       | H5  | 1.66                  |
| H5       | H9  | -3.23          | -1.74 | -1.49                 | C2       | H6  | 1.66                  |
| H5       | H10 | -2.19          | -1.78 | -0.41                 | O3       | H8  | 2.99                  |
| H6       | H7  | -2.19          | -1.78 | -0.41                 | O3       | H10 | 2.99                  |
| H6       | H8  | -3.23          | -1.74 | -1.49                 | O4       | H7  | 2.99                  |
| H6       | H9  | -2.19          | -1.78 | -0.41                 | O4       | H9  | 2.99                  |
| H6       | H10 | -3.23          | -1.74 | -1.49                 | C1       | H6  | 3.05                  |
| H7       | H8  | 0.58           | 0.08  | 0.50                  | C2       | H5  | 3.05                  |
| H7       | H9  | 0.80           | 0.67  | 0.13                  | H5       | H6  | 3.23                  |
| H7       | H10 | 0.25           | 0.21  | 0.04                  | C1       | C2  | 3.24                  |
| H8       | H9  | 0.25           | 0.21  | 0.04                  | O3       | H6  | 5.21                  |
| H8       | H10 | 0.80           | 0.67  | 0.13                  | O4       | H5  | 5.21                  |
| H9       | H10 | 0.58           | 0.08  | 0.50                  | O3       | O4  | 27.51                 |

**Table S30.** Part (a) shows a full set of the XC-term,  $V_{XC}^{A,B}$ , of interaction energies computed for all unique 45 atom-pairs in the **Ecl** and **Lin** conformers of glycol and changes in the XC-term,  $\Delta V_{XC}^{A,B}$ , on the **Lin**  $\rightarrow$  **Ecl** structural change. In addition and for convenience of interpretation, the atom pairs are also provided in the ascending order of the computed  $\Delta V_{XC}^{A,B}$  values (from most negative to most positive values) in Part (b). All values are in kcal mol<sup>-1</sup> and were obtained at the CCSD/BBC1 level.

| Part (a) |     |                |         |                       | Part (b) |     |                       |
|----------|-----|----------------|---------|-----------------------|----------|-----|-----------------------|
| Atom     |     | Ecl            | Lin     | Lin $\rightarrow$ Ecl | Atom     |     | Lin $\rightarrow$ Ecl |
| A        | B   | $V_{XC}^{A,B}$ |         | $\Delta V_{XC}^{A,B}$ | A        | B   | $\Delta V_{XC}^{A,B}$ |
| C1       | C2  | -162.65        | -168.29 | 5.64                  | O3       | O4  | -9.49                 |
| C1       | O3  | -7.90          | -10.95  | 3.05                  | C1       | O4  | -2.68                 |
| C1       | O4  | -157.51        | -154.83 | -2.68                 | C2       | O3  | -2.68                 |
| C1       | H5  | -1.43          | -1.32   | -0.10                 | O3       | H6  | -0.86                 |
| C1       | H6  | -0.48          | -0.50   | 0.01                  | O4       | H5  | -0.86                 |
| C1       | H7  | -157.32        | -156.98 | -0.34                 | H7       | H8  | -0.82                 |
| C1       | H8  | -4.06          | -3.79   | -0.28                 | H9       | H10 | -0.82                 |
| C1       | H9  | -157.32        | -156.98 | -0.34                 | O3       | H8  | -0.48                 |
| C1       | H10 | -4.06          | -3.79   | -0.28                 | O3       | H10 | -0.48                 |
| C2       | O3  | -157.51        | -154.83 | -2.68                 | O4       | H7  | -0.48                 |
| C2       | O4  | -7.90          | -10.95  | 3.05                  | O4       | H9  | -0.48                 |
| C2       | H5  | -0.48          | -0.50   | 0.01                  | C1       | H7  | -0.34                 |
| C2       | H6  | -1.43          | -1.32   | -0.10                 | C1       | H9  | -0.34                 |
| C2       | H7  | -4.06          | -3.79   | -0.28                 | C2       | H8  | -0.34                 |
| C2       | H8  | -157.32        | -156.98 | -0.34                 | C2       | H10 | -0.34                 |
| C2       | H9  | -4.06          | -3.79   | -0.28                 | C1       | H8  | -0.28                 |
| C2       | H10 | -157.32        | -156.98 | -0.34                 | C1       | H10 | -0.28                 |
| O3       | O4  | -15.26         | -5.77   | -9.49                 | C2       | H7  | -0.28                 |
| O3       | H5  | -0.67          | -0.50   | -0.16                 | C2       | H9  | -0.28                 |
| O3       | H6  | -118.93        | -118.07 | -0.86                 | H7       | H9  | -0.27                 |
| O3       | H7  | -0.70          | -1.96   | 1.26                  | H8       | H10 | -0.27                 |
| O3       | H8  | -6.58          | -6.10   | -0.48                 | O3       | H5  | -0.16                 |
| O3       | H9  | -0.70          | -1.96   | 1.26                  | O4       | H6  | -0.16                 |
| O3       | H10 | -6.58          | -6.10   | -0.48                 | C1       | H5  | -0.10                 |
| O4       | H5  | -118.93        | -118.07 | -0.86                 | C2       | H6  | -0.10                 |
| O4       | H6  | -0.67          | -0.50   | -0.16                 | H5       | H7  | -0.03                 |
| O4       | H7  | -6.58          | -6.10   | -0.48                 | H5       | H9  | -0.03                 |
| O4       | H8  | -0.70          | -1.96   | 1.26                  | H6       | H8  | -0.03                 |
| O4       | H9  | -6.58          | -6.10   | -0.48                 | H6       | H10 | -0.03                 |
| O4       | H10 | -0.70          | -1.96   | 1.26                  | H5       | H6  | -0.02                 |

**Table S30** continues.

| Part (a) |     |                |       |                       | Part (b) |     |                       |
|----------|-----|----------------|-------|-----------------------|----------|-----|-----------------------|
| Atom     |     | Ecl            | Lin   | Lin → Ecl             | Atom     |     | Lin → Ecl             |
| A        | B   | $V_{XC}^{A,B}$ |       | $\Delta V_{XC}^{A,B}$ | A        | B   | $\Delta V_{XC}^{A,B}$ |
| H5       | H6  | -0.20          | -0.19 | -0.02                 | H5       | H8  | 0.00                  |
| H5       | H7  | -0.14          | -0.11 | -0.03                 | H5       | H10 | 0.00                  |
| H5       | H8  | -0.04          | -0.03 | 0.00                  | H6       | H7  | 0.00                  |
| H5       | H9  | -0.14          | -0.11 | -0.03                 | H6       | H9  | 0.00                  |
| H5       | H10 | -0.04          | -0.03 | 0.00                  | C1       | H6  | 0.01                  |
| H6       | H7  | -0.04          | -0.03 | 0.00                  | C2       | H5  | 0.01                  |
| H6       | H8  | -0.14          | -0.11 | -0.03                 | H7       | H10 | 0.16                  |
| H6       | H9  | -0.04          | -0.03 | 0.00                  | H8       | H9  | 0.16                  |
| H6       | H10 | -0.14          | -0.11 | -0.03                 | O3       | H7  | 1.26                  |
| H7       | H8  | -1.46          | -0.64 | -0.82                 | O3       | H9  | 1.26                  |
| H7       | H9  | -3.45          | -3.18 | -0.27                 | O4       | H8  | 1.26                  |
| H7       | H10 | -0.51          | -0.67 | 0.16                  | O4       | H10 | 1.26                  |
| H8       | H9  | -0.51          | -0.67 | 0.16                  | C1       | O3  | 3.05                  |
| H8       | H10 | -3.45          | -3.18 | -0.27                 | C2       | O4  | 3.05                  |
| H9       | H10 | -1.46          | -0.64 | -0.82                 | C1       | C2  | 5.64                  |

**Table S31.** Relative to the CCSD/BBC1 data, analysis of interaction energies obtained at the HF level for covalently bonded atom-pairs and intramolecular interaction O4...H6 in the LEC of glycol.<sup>a</sup>

|        |        | CCSD/BBC1                     |                                   | HF                                   |                                      |                                      |                                    |         |
|--------|--------|-------------------------------|-----------------------------------|--------------------------------------|--------------------------------------|--------------------------------------|------------------------------------|---------|
| Atom A | Atom B | $E_{\text{int}}^{\text{A,B}}$ | $E_{\text{int}}^{\text{A,B}} / E$ | Comput $E_{\text{int}}^{\text{A,B}}$ | Expect $E_{\text{int}}^{\text{A,B}}$ | $\Delta E_{\text{int}}^{\text{A,B}}$ | $\Delta_{\text{int}}^{\text{A,B}}$ | %-error |
| C1     | C2     | -91.2                         | 6.32638E-04                       | -64.1                                | -90.9                                | 27.1                                 | 26.8                               | -41.8   |
| C1     | O4     | -363.1                        | 2.51920E-03                       | -471.1                               | -362.0                               | -108.0                               | -109.1                             | 23.2    |
| C1     | H7     | -137.4                        | 9.53175E-04                       | -165.4                               | -137.0                               | -28.0                                | -28.5                              | 17.2    |
| C1     | H9     | -138.9                        | 9.63366E-04                       | -168.2                               | -138.4                               | -29.3                                | -29.7                              | 17.7    |
| C2     | O3     | -378.6                        | 2.62634E-03                       | -492.4                               | -377.4                               | -113.8                               | -115.0                             | 23.4    |
| C2     | H8     | -135.6                        | 9.40822E-04                       | -162.8                               | -135.2                               | -27.1                                | -27.6                              | 16.9    |
| C2     | H10    | -136.8                        | 9.49285E-04                       | -165.2                               | -136.4                               | -28.3                                | -28.8                              | 17.4    |
| O3     | H6     | -318.7                        | 2.21099E-03                       | -366.7                               | -317.7                               | -48.0                                | -49.1                              | 13.4    |
| O4     | H5     | -316.4                        | 2.19526E-03                       | -362.5                               | -315.4                               | -46.0                                | -47.0                              | 13.0    |
| O4     | H6     | -90.9                         | 6.30517E-04                       | -103.9                               | -90.6                                | -13.0                                | -13.3                              | 12.8    |

<sup>a</sup>) Interaction energies, differences  $\Delta E_{\text{int}}^{\text{A,B}} = (E_{\text{int}}^{\text{A,B}})_{\text{HF}} - (E_{\text{int}}^{\text{A,B}})_{\text{CCSD/BBC1}}$  and relative errors  $\Delta_{\text{int}}^{\text{A,B}} = \text{Comput } E_{\text{int}}^{\text{A,B}} - \text{Expect } E_{\text{int}}^{\text{A,B}}$  are in kcal mol<sup>-1</sup>.

**Table S32.** Relative to the CCSD/BBC1 data, analysis of interaction energies obtained at the B3LYP level for covalently bonded atom-pairs and intramolecular interaction O4...H6 in the LEC of glycol.<sup>a</sup>

|        |        | CCSD/BBC1                     |                                   | B3LYP                                |                                      |                                      |                                    |         |
|--------|--------|-------------------------------|-----------------------------------|--------------------------------------|--------------------------------------|--------------------------------------|------------------------------------|---------|
| Atom A | Atom B | $E_{\text{int}}^{\text{A,B}}$ | $E_{\text{int}}^{\text{A,B}} / E$ | Comput $E_{\text{int}}^{\text{A,B}}$ | Expect $E_{\text{int}}^{\text{A,B}}$ | $\Delta E_{\text{int}}^{\text{A,B}}$ | $\Delta_{\text{int}}^{\text{A,B}}$ | %-error |
| C1     | C2     | -91.2                         | 6.32638E-04                       | -117.1                               | -91.4                                | -25.9                                | -25.7                              | 22.0    |
| C1     | O4     | -363.1                        | 2.51920E-03                       | -352.8                               | -364.1                               | 10.3                                 | 11.2                               | -3.2    |
| C1     | H7     | -137.4                        | 9.53175E-04                       | -149.5                               | -137.7                               | -12.1                                | -11.8                              | 7.9     |
| C1     | H9     | -138.9                        | 9.63366E-04                       | -150.7                               | -139.2                               | -11.9                                | -11.5                              | 7.6     |
| C2     | O3     | -378.6                        | 2.62634E-03                       | -368.6                               | -379.5                               | 10.0                                 | 11.0                               | -3.0    |
| C2     | H8     | -135.6                        | 9.40822E-04                       | -147.2                               | -136.0                               | -11.6                                | -11.2                              | 7.6     |
| C2     | H10    | -136.8                        | 9.49285E-04                       | -148.4                               | -137.2                               | -11.6                                | -11.3                              | 7.6     |
| O3     | H6     | -318.7                        | 2.21099E-03                       | -322.0                               | -319.5                               | -3.2                                 | -2.4                               | 0.8     |
| O4     | H5     | -316.4                        | 2.19526E-03                       | -319.7                               | -317.2                               | -3.3                                 | -2.5                               | 0.8     |
| O4     | H6     | -90.9                         | 6.30517E-04                       | -86.1                                | -91.1                                | 4.8                                  | 5.0                                | -5.8    |

<sup>a</sup>) Interaction energies, differences  $\Delta E_{\text{int}}^{\text{A,B}} = (E_{\text{int}}^{\text{A,B}})_{\text{B3LYP}} - (E_{\text{int}}^{\text{A,B}})_{\text{CCSD/BBC1}}$  and relative errors  $\Delta_{\text{int}}^{\text{A,B}} = \text{Comput } E_{\text{int}}^{\text{A,B}} - \text{Expect } E_{\text{int}}^{\text{A,B}}$  are in kcal mol<sup>-1</sup>.

**Table S33.** Relative to the CCSD/BBC1 data, analysis of interaction energies obtained at the B3LYP-GD3 level for covalently bonded atom-pairs and intramolecular interaction O4...H6 in the LEC of glycol.<sup>a</sup>

| Atom A | Atom B | CCSD/BBC1                     |                                   | B3LYP-GD3                            |                                      |                                      |                                    |         |
|--------|--------|-------------------------------|-----------------------------------|--------------------------------------|--------------------------------------|--------------------------------------|------------------------------------|---------|
|        |        | $E_{\text{int}}^{\text{A,B}}$ | $E_{\text{int}}^{\text{A,B}} / E$ | Comput $E_{\text{int}}^{\text{A,B}}$ | Expect $E_{\text{int}}^{\text{A,B}}$ | $\Delta E_{\text{int}}^{\text{A,B}}$ | $\Delta_{\text{int}}^{\text{A,B}}$ | %-error |
| C1     | C2     | -91.2                         | 6.32638E-04                       | -117.4                               | -91.4                                | -26.2                                | -26.0                              | 22.1    |
| C1     | O4     | -363.1                        | 2.51920E-03                       | -351.9                               | -364.1                               | 11.2                                 | 12.1                               | -3.4    |
| C1     | H7     | -137.4                        | 9.53175E-04                       | -149.4                               | -137.7                               | -12.0                                | -11.7                              | 7.8     |
| C1     | H9     | -138.9                        | 9.63366E-04                       | -150.7                               | -139.2                               | -11.8                                | -11.5                              | 7.6     |
| C2     | O3     | -378.6                        | 2.62634E-03                       | -367.7                               | -379.5                               | 10.9                                 | 11.8                               | -3.2    |
| C2     | H8     | -135.6                        | 9.40822E-04                       | -147.2                               | -136.0                               | -11.6                                | -11.2                              | 7.6     |
| C2     | H10    | -136.8                        | 9.49285E-04                       | -148.3                               | -137.2                               | -11.5                                | -11.2                              | 7.5     |
| O3     | H6     | -318.7                        | 2.21099E-03                       | -321.8                               | -319.5                               | -3.1                                 | -2.3                               | 0.7     |
| O4     | H5     | -316.4                        | 2.19526E-03                       | -319.6                               | -317.2                               | -3.1                                 | -2.3                               | 0.7     |
| O4     | H6     | -90.9                         | 6.30517E-04                       | -85.8                                | -91.1                                | 5.1                                  | 5.4                                | -6.2    |

<sup>a</sup>) Interaction energies, differences  $\Delta E_{\text{int}}^{\text{A,B}} = (E_{\text{int}}^{\text{A,B}})_{\text{B3LYP-GD3}} - (E_{\text{int}}^{\text{A,B}})_{\text{CCSD/BBC1}}$  and relative errors  $\Delta_{\text{int}}^{\text{A,B}} = \text{Comput } E_{\text{int}}^{\text{A,B}} - \text{Expect } E_{\text{int}}^{\text{A,B}}$  are in kcal mol<sup>-1</sup>.

**Table S34.** Relative to the CCSD/BBC1 data, analysis of interaction energies obtained at the MP2/Müller level for covalently bonded atom-pairs and intramolecular interaction O4...H6 in the LEC of glycol.<sup>a</sup>

| Atom A | Atom B | CCSD/BBC1                     |                                   | MP2/Müller                           |                                      |                                      |                                    |         |
|--------|--------|-------------------------------|-----------------------------------|--------------------------------------|--------------------------------------|--------------------------------------|------------------------------------|---------|
|        |        | $E_{\text{int}}^{\text{A,B}}$ | $E_{\text{int}}^{\text{A,B}} / E$ | Comput $E_{\text{int}}^{\text{A,B}}$ | Expect $E_{\text{int}}^{\text{A,B}}$ | $\Delta E_{\text{int}}^{\text{A,B}}$ | $\Delta_{\text{int}}^{\text{A,B}}$ | %-error |
| C1     | C2     | -91.2                         | 6.32638E-04                       | -99.2                                | -91.2                                | -8.0                                 | -8.0                               | 8.1     |
| C1     | O4     | -363.1                        | 2.51920E-03                       | -352.4                               | -363.1                               | 10.7                                 | 10.7                               | -3.0    |
| C1     | H7     | -137.4                        | 9.53175E-04                       | -139.4                               | -137.4                               | -2.0                                 | -2.0                               | 1.4     |
| C1     | H9     | -138.9                        | 9.63366E-04                       | -140.8                               | -138.8                               | -1.9                                 | -2.0                               | 1.4     |
| C2     | O3     | -378.6                        | 2.62634E-03                       | -368.6                               | -378.5                               | 10.0                                 | 9.9                                | -2.7    |
| C2     | H8     | -135.6                        | 9.40822E-04                       | -137.2                               | -135.6                               | -1.6                                 | -1.6                               | 1.2     |
| C2     | H10    | -136.8                        | 9.49285E-04                       | -138.6                               | -136.8                               | -1.7                                 | -1.8                               | 1.3     |
| O3     | H6     | -318.7                        | 2.21099E-03                       | -324.9                               | -318.7                               | -6.2                                 | -6.2                               | 1.9     |
| O4     | H5     | -316.4                        | 2.19526E-03                       | -321.7                               | -316.4                               | -5.3                                 | -5.3                               | 1.7     |
| O4     | H6     | -90.9                         | 6.30517E-04                       | -93.0                                | -90.9                                | -2.1                                 | -2.1                               | 2.2     |

<sup>a</sup>) Interaction energies, differences  $\Delta E_{\text{int}}^{\text{A,B}} = (E_{\text{int}}^{\text{A,B}})_{\text{MP2/Müller}} - (E_{\text{int}}^{\text{A,B}})_{\text{CCSD/BBC1}}$  and relative errors  $\Delta_{\text{int}}^{\text{A,B}} = \text{Comput } E_{\text{int}}^{\text{A,B}} - \text{Expect } E_{\text{int}}^{\text{A,B}}$  are in kcal/mol.



**Table S35.** Relative to the CCSD/BBC1 data, analysis of interaction energies obtained at the HF levels for covalently bonded atom-pairs in the **Lin** conformer of glycol.<sup>a</sup>

| Atom A | Atom B | CCSD/BBC1                     |                                   | HF                                   |                                      |                                      |                                    |         |
|--------|--------|-------------------------------|-----------------------------------|--------------------------------------|--------------------------------------|--------------------------------------|------------------------------------|---------|
|        |        | $E_{\text{int}}^{\text{A,B}}$ | $E_{\text{int}}^{\text{A,B}} / E$ | Comput $E_{\text{int}}^{\text{A,B}}$ | Expect $E_{\text{int}}^{\text{A,B}}$ | $\Delta E_{\text{int}}^{\text{A,B}}$ | $\Delta_{\text{int}}^{\text{A,B}}$ | %-error |
| C1     | C2     | -89.9                         | 6.23500E-04                       | -62.7                                | -89.6                                | 27.2                                 | 26.9                               | -43.0   |
| C1     | O4     | -370.6                        | 2.57119E-03                       | -481.6                               | -369.4                               | -111.0                               | -112.2                             | 23.3    |
| C1     | H7     | -137.7                        | 9.55436E-04                       | -166.1                               | -137.3                               | -28.3                                | -28.8                              | 17.3    |
| C1     | H9     | -137.7                        | 9.55436E-04                       | -166.1                               | -137.3                               | -28.3                                | -28.8                              | 17.3    |
| C2     | O3     | -370.6                        | 2.57119E-03                       | -481.6                               | -369.4                               | -111.0                               | -112.2                             | 23.3    |
| C2     | H8     | -137.7                        | 9.55436E-04                       | -166.1                               | -137.3                               | -28.3                                | -28.8                              | 17.3    |
| C2     | H10    | -137.7                        | 9.55436E-04                       | -166.1                               | -137.3                               | -28.3                                | -28.8                              | 17.3    |
| O3     | H6     | -314.3                        | 2.18078E-03                       | -361.8                               | -313.3                               | -47.4                                | -48.4                              | 13.4    |
| O4     | H5     | -314.3                        | 2.18078E-03                       | -361.8                               | -313.3                               | -47.4                                | -48.4                              | 13.4    |

<sup>a</sup>) Interaction energies, differences  $\Delta E_{\text{int}}^{\text{A,B}} = (E_{\text{int}}^{\text{A,B}})_{\text{HF}} - (E_{\text{int}}^{\text{A,B}})_{\text{CCSD/BBC1}}$  and relative errors  $\Delta_{\text{int}}^{\text{A,B}} = \frac{\text{Comput } E_{\text{int}}^{\text{A,B}} - \text{Expect } E_{\text{int}}^{\text{A,B}}}{\text{Expect } E_{\text{int}}^{\text{A,B}}}$  are in kcal mol<sup>-1</sup>.

**Table S36.** Relative to the CCSD/BBC1 data, analysis of interaction energies obtained at the B3LYP level for covalently bonded atom-pairs in the **Lin** conformer of glycol.<sup>a</sup>

| Atom A | Atom B | CCSD/BBC1                     |                                   | B3LYP                                |                                      |                                      |                                    |         |
|--------|--------|-------------------------------|-----------------------------------|--------------------------------------|--------------------------------------|--------------------------------------|------------------------------------|---------|
|        |        | $E_{\text{int}}^{\text{A,B}}$ | $E_{\text{int}}^{\text{A,B}} / E$ | Comput $E_{\text{int}}^{\text{A,B}}$ | Expect $E_{\text{int}}^{\text{A,B}}$ | $\Delta E_{\text{int}}^{\text{A,B}}$ | $\Delta_{\text{int}}^{\text{A,B}}$ | %-error |
| C1     | C2     | -89.9                         | 6.23500E-04                       | -115.5                               | -90.1                                | -25.7                                | -25.4                              | 22.0    |
| C1     | O4     | -370.6                        | 2.57119E-03                       | -361.0                               | -371.6                               | 9.6                                  | 10.5                               | -2.9    |
| C1     | H7     | -137.7                        | 9.55436E-04                       | -149.7                               | -138.1                               | -12.0                                | -11.6                              | 7.8     |
| C1     | H9     | -137.7                        | 9.55436E-04                       | -149.7                               | -138.1                               | -12.0                                | -11.6                              | 7.8     |
| C2     | O3     | -370.6                        | 2.57119E-03                       | -361.0                               | -371.6                               | 9.6                                  | 10.5                               | -2.9    |
| C2     | H8     | -137.7                        | 9.55436E-04                       | -149.7                               | -138.1                               | -12.0                                | -11.6                              | 7.8     |
| C2     | H10    | -137.7                        | 9.55436E-04                       | -149.7                               | -138.1                               | -12.0                                | -11.6                              | 7.8     |
| O3     | H6     | -314.3                        | 2.18078E-03                       | -318.9                               | -315.1                               | -4.6                                 | -3.8                               | 1.2     |
| O4     | H5     | -314.3                        | 2.18078E-03                       | -318.9                               | -315.1                               | -4.6                                 | -3.8                               | 1.2     |

<sup>a</sup>) Interaction energies, differences  $\Delta E_{\text{int}}^{\text{A,B}} = (E_{\text{int}}^{\text{A,B}})_{\text{B3LYP}} - (E_{\text{int}}^{\text{A,B}})_{\text{CCSD/BBC1}}$  and relative errors  $\Delta_{\text{int}}^{\text{A,B}} = \frac{\text{Comput } E_{\text{int}}^{\text{A,B}} - \text{Expect } E_{\text{int}}^{\text{A,B}}}{\text{Expect } E_{\text{int}}^{\text{A,B}}}$  are in kcal mol<sup>-1</sup>.

**Table S37.** Relative to the CCSD/BBC1 data, analysis of interaction energies obtained at the B3LYP-GD3 level for covalently bonded atom-pairs in the **Lin** conformer of glycol.<sup>a</sup>

| Atom A | Atom B | CCSD/BBC1                     |                                   | B3LYP-GD3                            |                                      |                                      |                                    |         |
|--------|--------|-------------------------------|-----------------------------------|--------------------------------------|--------------------------------------|--------------------------------------|------------------------------------|---------|
|        |        | $E_{\text{int}}^{\text{A,B}}$ | $E_{\text{int}}^{\text{A,B}} / E$ | Comput $E_{\text{int}}^{\text{A,B}}$ | Expect $E_{\text{int}}^{\text{A,B}}$ | $\Delta E_{\text{int}}^{\text{A,B}}$ | $\Delta_{\text{int}}^{\text{A,B}}$ | %-error |
| C1     | C2     | -89.9                         | 6.23500E-04                       | -115.6                               | -90.1                                | -25.7                                | -25.5                              | 22.1    |
| C1     | O4     | -370.6                        | 2.57119E-03                       | -360.6                               | -371.6                               | 10.0                                 | 10.9                               | -3.0    |
| C1     | H7     | -137.7                        | 9.55436E-04                       | -149.6                               | -138.1                               | -11.9                                | -11.6                              | 7.7     |
| C1     | H9     | -137.7                        | 9.55436E-04                       | -149.6                               | -138.1                               | -11.9                                | -11.6                              | 7.7     |
| C2     | O3     | -370.6                        | 2.57119E-03                       | -360.6                               | -371.6                               | 10.0                                 | 10.9                               | -3.0    |
| C2     | H8     | -137.7                        | 9.55436E-04                       | -149.6                               | -138.1                               | -11.9                                | -11.6                              | 7.7     |
| C2     | H10    | -137.7                        | 9.55436E-04                       | -149.6                               | -138.1                               | -11.9                                | -11.6                              | 7.7     |
| O3     | H6     | -314.3                        | 2.18078E-03                       | -318.9                               | -315.2                               | -4.5                                 | -3.7                               | 1.2     |
| O4     | H5     | -314.3                        | 2.18078E-03                       | -318.9                               | -315.2                               | -4.5                                 | -3.7                               | 1.2     |

<sup>a</sup>) Interaction energies, differences  $\Delta E_{\text{int}}^{\text{A,B}} = (E_{\text{int}}^{\text{A,B}})_{\text{B3LYP-GD3}} - (E_{\text{int}}^{\text{A,B}})_{\text{CCSD/BBC1}}$  and relative errors  $\Delta_{\text{int}}^{\text{A,B}} = \text{Comput } E_{\text{int}}^{\text{A,B}} - \text{Expect } E_{\text{int}}^{\text{A,B}}$  are in kcal mol<sup>-1</sup>.

**Table S38.** Relative to the CCSD/BBC1 data, analysis of interaction energies obtained at the MP2/Müller level for covalently bonded atom-pairs in the **Lin** conformer of glycol.<sup>a</sup>

| Atom A | Atom B | CCSD/BBC1                     |                                   | MP2/Müller                           |                                      |                                      |                                    |         |
|--------|--------|-------------------------------|-----------------------------------|--------------------------------------|--------------------------------------|--------------------------------------|------------------------------------|---------|
|        |        | $E_{\text{int}}^{\text{A,B}}$ | $E_{\text{int}}^{\text{A,B}} / E$ | Comput $E_{\text{int}}^{\text{A,B}}$ | Expect $E_{\text{int}}^{\text{A,B}}$ | $\Delta E_{\text{int}}^{\text{A,B}}$ | $\Delta_{\text{int}}^{\text{A,B}}$ | %-error |
| C1     | C2     | -89.9                         | 6.23500E-04                       | -97.3                                | -89.9                                | -7.4                                 | -7.5                               | 7.7     |
| C1     | O4     | -370.6                        | 2.57119E-03                       | -361.0                               | -370.6                               | 9.6                                  | 9.6                                | -2.7    |
| C1     | H7     | -137.7                        | 9.55436E-04                       | -139.7                               | -137.7                               | -2.0                                 | -2.0                               | 1.5     |
| C1     | H9     | -137.7                        | 9.55436E-04                       | -139.7                               | -137.7                               | -2.0                                 | -2.0                               | 1.4     |
| C2     | O3     | -370.6                        | 2.57119E-03                       | -361.0                               | -370.6                               | 9.6                                  | 9.6                                | -2.7    |
| C2     | H8     | -137.7                        | 9.55436E-04                       | -139.7                               | -137.7                               | -2.0                                 | -2.0                               | 1.5     |
| C2     | H10    | -137.7                        | 9.55436E-04                       | -139.7                               | -137.7                               | -2.0                                 | -2.0                               | 1.4     |
| O3     | H6     | -314.3                        | 2.18078E-03                       | -320.7                               | -314.3                               | -6.4                                 | -6.4                               | 2.0     |
| O4     | H5     | -314.3                        | 2.18078E-03                       | -320.7                               | -314.3                               | -6.4                                 | -6.4                               | 2.0     |

<sup>a</sup>) Interaction energies, differences  $\Delta E_{\text{int}}^{\text{A,B}} = (E_{\text{int}}^{\text{A,B}})_{\text{MP2/Müller}} - (E_{\text{int}}^{\text{A,B}})_{\text{CCSD/BBC1}}$  and relative errors  $\Delta_{\text{int}}^{\text{A,B}} = \text{Comput } E_{\text{int}}^{\text{A,B}} - \text{Expect } E_{\text{int}}^{\text{A,B}}$  are in kcal mol<sup>-1</sup>.

**Table S39.** Relative to the CCSD/BBC1 data, analysis of interaction energies obtained at the HF level for covalently bonded atom-pairs and the intramolecular O3...O4 interaction in the **Ecl** conformer of glycol.<sup>a</sup>

| Atom A | Atom B | CCSD/BBC1                     |                                   | HF                                   |                                      |                                      |                                    |         |
|--------|--------|-------------------------------|-----------------------------------|--------------------------------------|--------------------------------------|--------------------------------------|------------------------------------|---------|
|        |        | $E_{\text{int}}^{\text{A,B}}$ | $E_{\text{int}}^{\text{A,B}} / E$ | Comput $E_{\text{int}}^{\text{A,B}}$ | Expect $E_{\text{int}}^{\text{A,B}}$ | $\Delta E_{\text{int}}^{\text{A,B}}$ | $\Delta_{\text{int}}^{\text{A,B}}$ | %-error |
| C1     | C2     | -81.0                         | 5.61947E-04                       | -51.2                                | -80.7                                | 29.8                                 | 29.6                               | -57.8   |
| C1     | O4     | -372.1                        | 2.58130E-03                       | -489.8                               | -370.9                               | -117.7                               | -118.9                             | 24.3    |
| C1     | H7     | -141.3                        | 9.80326E-04                       | -171.8                               | -140.8                               | -30.5                                | -30.9                              | 18.0    |
| C1     | H9     | -141.3                        | 9.80326E-04                       | -171.8                               | -140.8                               | -30.5                                | -30.9                              | 18.0    |
| C2     | O3     | -372.1                        | 2.58130E-03                       | -489.7                               | -370.9                               | -117.7                               | -118.8                             | 24.3    |
| C2     | H8     | -141.3                        | 9.80326E-04                       | -171.8                               | -140.8                               | -30.5                                | -30.9                              | 18.0    |
| C2     | H10    | -141.3                        | 9.80326E-04                       | -171.8                               | -140.8                               | -30.5                                | -30.9                              | 18.0    |
| O3     | H6     | -310.0                        | 2.15069E-03                       | -358.4                               | -309.0                               | -48.4                                | -49.4                              | 13.8    |
| O4     | H5     | -310.0                        | 2.15069E-03                       | -358.4                               | -309.0                               | -48.4                                | -49.4                              | 13.8    |
| O3     | O4     | 121.2                         | -8.40799E-04                      | 168.1                                | 120.8                                | 46.9                                 | 47.3                               | 28.1    |

<sup>a</sup>) Interaction energies, differences  $\Delta E_{\text{int}}^{\text{A,B}} = (E_{\text{int}}^{\text{A,B}})_{\text{HF}} - (E_{\text{int}}^{\text{A,B}})_{\text{CCSD/BBC1}}$  and relative errors  $\Delta_{\text{int}}^{\text{A,B}} = \frac{\text{Comput } E_{\text{int}}^{\text{A,B}} - \text{Expect } E_{\text{int}}^{\text{A,B}}}{\text{Expect } E_{\text{int}}^{\text{A,B}}}$  are in kcal mol<sup>-1</sup>.

**Table S40.** Relative to the CCSD/BBC1 data, analysis of interaction energies obtained at the B3LYP level for covalently bonded atom-pairs and the intramolecular O3...O4 interaction in the **Ecl** conformer of glycol.<sup>a</sup>

| Atom A | Atom B | CCSD/BBC1                     |                                   | B3LYP                                |                                      |                                      |                                    |         |
|--------|--------|-------------------------------|-----------------------------------|--------------------------------------|--------------------------------------|--------------------------------------|------------------------------------|---------|
|        |        | $E_{\text{int}}^{\text{A,B}}$ | $E_{\text{int}}^{\text{A,B}} / E$ | Comput $E_{\text{int}}^{\text{A,B}}$ | Expect $E_{\text{int}}^{\text{A,B}}$ | $\Delta E_{\text{int}}^{\text{A,B}}$ | $\Delta_{\text{int}}^{\text{A,B}}$ | %-error |
| C1     | C2     | -81.0                         | 5.61947E-04                       | -106.2                               | -81.2                                | -25.2                                | -25.0                              | 23.6    |
| C1     | O4     | -372.1                        | 2.58130E-03                       | -364.6                               | -373.0                               | 7.5                                  | 8.4                                | -2.3    |
| C1     | H7     | -141.3                        | 9.80326E-04                       | -153.0                               | -141.7                               | -11.7                                | -11.4                              | 7.4     |
| C1     | H9     | -141.3                        | 9.80326E-04                       | -153.0                               | -141.7                               | -11.7                                | -11.4                              | 7.4     |
| C2     | O3     | -372.1                        | 2.58130E-03                       | -364.6                               | -373.0                               | 7.5                                  | 8.4                                | -2.3    |
| C2     | H8     | -141.3                        | 9.80326E-04                       | -153.0                               | -141.7                               | -11.7                                | -11.4                              | 7.4     |
| C2     | H10    | -141.3                        | 9.80326E-04                       | -153.0                               | -141.7                               | -11.7                                | -11.4                              | 7.4     |
| O3     | H6     | -310.0                        | 2.15069E-03                       | -315.4                               | -310.8                               | -5.4                                 | -4.6                               | 1.5     |
| O4     | H5     | -310.0                        | 2.15069E-03                       | -315.4                               | -310.8                               | -5.4                                 | -4.6                               | 1.5     |
| O3     | O4     | 121.2                         | -8.40799E-04                      | 121.4                                | 121.5                                | 0.3                                  | -0.1                               | 0.0     |

<sup>a</sup>) Interaction energies, differences  $\Delta E_{\text{int}}^{\text{A,B}} = (E_{\text{int}}^{\text{A,B}})_{\text{B3LYP}} - (E_{\text{int}}^{\text{A,B}})_{\text{CCSD/BBC1}}$  and relative errors  $\Delta_{\text{int}}^{\text{A,B}} = \frac{\text{Comput } E_{\text{int}}^{\text{A,B}} - \text{Expect } E_{\text{int}}^{\text{A,B}}}{\text{Expect } E_{\text{int}}^{\text{A,B}}}$  are in kcal mol<sup>-1</sup>.

**Table S41.** Relative to the CCSD/BBC1 data, analysis of interaction energies obtained at the B3LYP-GD3 level for covalently bonded atom-pairs and the intramolecular O3...O4 interaction in the **Ecl** conformer of glycol.<sup>a</sup>

| Atom A | Atom B | CCSD/BBC1                     |                                   | B3LYP-GD3                            |                                      |                                      |                                    |         |
|--------|--------|-------------------------------|-----------------------------------|--------------------------------------|--------------------------------------|--------------------------------------|------------------------------------|---------|
|        |        | $E_{\text{int}}^{\text{A,B}}$ | $E_{\text{int}}^{\text{A,B}} / E$ | Comput $E_{\text{int}}^{\text{A,B}}$ | Expect $E_{\text{int}}^{\text{A,B}}$ | $\Delta E_{\text{int}}^{\text{A,B}}$ | $\Delta_{\text{int}}^{\text{A,B}}$ | %-error |
| C1     | C2     | -81.0                         | 5.61947E-04                       | -106.4                               | -81.2                                | -25.4                                | -25.2                              | 23.7    |
| C1     | O4     | -372.1                        | 2.58130E-03                       | -363.7                               | -373.0                               | 8.3                                  | 9.3                                | -2.6    |
| C1     | H7     | -141.3                        | 9.80326E-04                       | -153.0                               | -141.7                               | -11.7                                | -11.3                              | 7.4     |
| C1     | H9     | -141.3                        | 9.80326E-04                       | -153.0                               | -141.7                               | -11.7                                | -11.3                              | 7.4     |
| C2     | O3     | -372.1                        | 2.58130E-03                       | -363.7                               | -373.0                               | 8.3                                  | 9.3                                | -2.6    |
| C2     | H8     | -141.3                        | 9.80326E-04                       | -153.0                               | -141.7                               | -11.7                                | -11.3                              | 7.4     |
| C2     | H10    | -141.3                        | 9.80326E-04                       | -153.0                               | -141.7                               | -11.7                                | -11.3                              | 7.4     |
| O3     | H6     | -310.0                        | 2.15069E-03                       | -315.2                               | -310.8                               | -5.2                                 | -4.5                               | 1.4     |
| O4     | H5     | -310.0                        | 2.15069E-03                       | -315.2                               | -310.8                               | -5.2                                 | -4.5                               | 1.4     |
| O3     | O4     | 121.2                         | -8.40799E-04                      | 121.2                                | 121.5                                | 0.1                                  | -0.3                               | -0.2    |

<sup>a</sup>) Interaction energies, differences  $\Delta E_{\text{int}}^{\text{A,B}} = (E_{\text{int}}^{\text{A,B}})_{\text{B3LYP-GD3}} - (E_{\text{int}}^{\text{A,B}})_{\text{CCSD/BBC1}}$  and relative errors  $\Delta_{\text{int}}^{\text{A,B}} = \text{Comput } E_{\text{int}}^{\text{A,B}} - \text{Expect } E_{\text{int}}^{\text{A,B}}$  are in kcal mol<sup>-1</sup>.

**Table S42.** Relative to the CCSD/BBC1 data, analysis of interaction energies obtained at the MP2/Müller level for covalently bonded atom-pairs and the intramolecular O3...O4 interaction in the **Ecl** conformer of glycol.<sup>a</sup>

| Atom A | Atom B | CCSD/BBC1                     |                                   | MP2/Müller                           |                                      |                                      |                                    |         |
|--------|--------|-------------------------------|-----------------------------------|--------------------------------------|--------------------------------------|--------------------------------------|------------------------------------|---------|
|        |        | $E_{\text{int}}^{\text{A,B}}$ | $E_{\text{int}}^{\text{A,B}} / E$ | Comput $E_{\text{int}}^{\text{A,B}}$ | Expect $E_{\text{int}}^{\text{A,B}}$ | $\Delta E_{\text{int}}^{\text{A,B}}$ | $\Delta_{\text{int}}^{\text{A,B}}$ | %-error |
| C1     | C2     | -81.0                         | 5.61947E-04                       | -87.9                                | -81.0                                | -6.9                                 | -6.9                               | 7.8     |
| C1     | O4     | -372.1                        | 2.58130E-03                       | -362.9                               | -372.0                               | 9.1                                  | 9.1                                | -2.5    |
| C1     | H7     | -141.3                        | 9.80326E-04                       | -143.2                               | -141.3                               | -1.9                                 | -2.0                               | 1.4     |
| C1     | H9     | -141.3                        | 9.80326E-04                       | -143.2                               | -141.3                               | -1.9                                 | -2.0                               | 1.4     |
| C2     | O3     | -372.1                        | 2.58130E-03                       | -363.0                               | -372.0                               | 9.1                                  | 9.0                                | -2.5    |
| C2     | H8     | -141.3                        | 9.80326E-04                       | -143.2                               | -141.3                               | -1.9                                 | -1.9                               | 1.4     |
| C2     | H10    | -141.3                        | 9.80326E-04                       | -143.2                               | -141.3                               | -1.9                                 | -1.9                               | 1.4     |
| O3     | H6     | -310.0                        | 2.15069E-03                       | -316.3                               | -309.9                               | -6.3                                 | -6.4                               | 2.0     |
| O4     | H5     | -310.0                        | 2.15069E-03                       | -316.3                               | -309.9                               | -6.3                                 | -6.3                               | 2.0     |
| O3     | O4     | 121.2                         | -8.40799E-04                      | 126.8                                | 121.2                                | 5.6                                  | 5.6                                | 4.4     |

<sup>a</sup>) Interaction energies, differences  $\Delta E_{\text{int}}^{\text{A,B}} = (E_{\text{int}}^{\text{A,B}})_{\text{MP2/Müller}} - (E_{\text{int}}^{\text{A,B}})_{\text{CCSD/BBC1}}$  and relative errors  $\Delta_{\text{int}}^{\text{A,B}} = \text{Comput } E_{\text{int}}^{\text{A,B}} - \text{Expect } E_{\text{int}}^{\text{A,B}}$  are in kcal mol<sup>-1</sup>.

**Table S43.** Relative to the CCSD/BBC1 data, analysis of a classical component of interaction energies obtained at the HF level for covalently bonded atom-pairs and the intramolecular O4...H6 interaction in the LEC of glycol.<sup>a</sup>

| Atom A | Atom B | CCSD/BBC1      |                    | HF                    |                       |                       |                     |         |
|--------|--------|----------------|--------------------|-----------------------|-----------------------|-----------------------|---------------------|---------|
|        |        | $V_{cl}^{A,B}$ | $V_{cl}^{A,B} / E$ | Comput $V_{cl}^{A,B}$ | Expect $V_{cl}^{A,B}$ | $\Delta V_{cl}^{A,B}$ | $\Delta_{cl}^{A,B}$ | %-error |
| C1     | C2     | 78.3           | -5.43506E-04       | 118.5                 | 78.1                  | 40.1                  | 40.4                | 34.1    |
| C1     | O4     | -209.6         | 1.45392E-03        | -319.3                | -208.9                | -109.7                | -110.4              | 34.6    |
| C1     | H7     | 19.7           | -1.36560E-04       | 9.6                   | 19.6                  | -10.1                 | -10.0               | -104.3  |
| C1     | H9     | 18.4           | -1.27693E-04       | 7.0                   | 18.3                  | -11.5                 | -11.4               | -163.8  |
| C2     | O3     | -221.2         | 1.53461E-03        | -337.6                | -220.5                | -116.4                | -117.1              | 34.7    |
| C2     | H8     | 21.9           | -1.51739E-04       | 12.2                  | 21.8                  | -9.6                  | -9.6                | -78.3   |
| C2     | H10    | 19.5           | -1.35299E-04       | 9.1                   | 19.4                  | -10.4                 | -10.4               | -114.5  |
| O3     | H6     | -204.5         | 1.41879E-03        | -250.2                | -203.9                | -45.7                 | -46.3               | 18.5    |
| O4     | H5     | -198.1         | 1.37395E-03        | -242.4                | -197.4                | -44.3                 | -45.0               | 18.5    |
| O4     | H6     | -87.9          | 6.09474E-04        | -102.6                | -87.6                 | -14.8                 | -15.0               | 14.7    |

<sup>a</sup>) Classical components of interaction energies, differences  $\Delta V_{cl}^{A,B} = (V_{cl}^{A,B})_{HF} - (V_{cl}^{A,B})_{CCSD/BBC1}$  and relative errors  $\Delta_{cl}^{A,B} = \text{Comput } V_{cl}^{A,B} - \text{Expect } V_{cl}^{A,B}$  are in kcal mol<sup>-1</sup>.

**Table S44.** Relative to the CCSD/BBC1 data, analysis of a classical component of interaction energies obtained at the B3LYP level for covalently bonded atom-pairs and the intramolecular O4...H6 interaction in the LEC of glycol.<sup>a</sup>

| Atom A | Atom B | CCSD/BBC1      |                    | B3LYP                 |                       |                       |                     |         |
|--------|--------|----------------|--------------------|-----------------------|-----------------------|-----------------------|---------------------|---------|
|        |        | $V_{cl}^{A,B}$ | $V_{cl}^{A,B} / E$ | Comput $V_{cl}^{A,B}$ | Expect $V_{cl}^{A,B}$ | $\Delta V_{cl}^{A,B}$ | $\Delta_{cl}^{A,B}$ | %-error |
| C1     | C2     | 78.3           | -5.43506E-04       | 66.2                  | 78.5                  | -12.1                 | -12.3               | -18.6   |
| C1     | O4     | -209.6         | 1.45392E-03        | -188.2                | -210.1                | 21.4                  | 21.9                | -11.7   |
| C1     | H7     | 19.7           | -1.36560E-04       | 22.3                  | 19.7                  | 2.6                   | 2.6                 | 11.6    |
| C1     | H9     | 18.4           | -1.27693E-04       | 21.1                  | 18.5                  | 2.7                   | 2.7                 | 12.6    |
| C2     | O3     | -221.2         | 1.53461E-03        | -199.8                | -221.8                | 21.4                  | 21.9                | -11.0   |
| C2     | H8     | 21.9           | -1.51739E-04       | 24.7                  | 21.9                  | 2.9                   | 2.8                 | 11.3    |
| C2     | H10    | 19.5           | -1.35299E-04       | 22.3                  | 19.6                  | 2.8                   | 2.8                 | 12.4    |
| O3     | H6     | -204.5         | 1.41879E-03        | -200.1                | -205.0                | 4.4                   | 4.9                 | -2.5    |
| O4     | H5     | -198.1         | 1.37395E-03        | -194.1                | -198.6                | 3.9                   | 4.4                 | -2.3    |
| O4     | H6     | -87.9          | 6.09474E-04        | -83.8                 | -88.1                 | 4.0                   | 4.3                 | -5.1    |

<sup>a</sup>) Classical components of interaction energies, differences  $\Delta V_{cl}^{A,B} = (V_{cl}^{A,B})_{B3LYP} - (V_{cl}^{A,B})_{CCSD/BBC1}$  and relative errors  $\Delta_{cl}^{A,B} = \text{Comput } V_{cl}^{A,B} - \text{Expect } V_{cl}^{A,B}$  are in kcal mol<sup>-1</sup>.

**Table S45.** Relative to the CCSD/BBC1 data, analysis of a classical component of interaction energies obtained at the B3LYP-GD3 level for covalently bonded atom-pairs and the intramolecular O4...H6 interaction in the LEC of glycol.<sup>a</sup>

| Atom A | Atom B | CCSD/BBC1      |                    | B3LYP-GD3             |                       |                       |                     |         |
|--------|--------|----------------|--------------------|-----------------------|-----------------------|-----------------------|---------------------|---------|
|        |        | $V_{cl}^{A,B}$ | $V_{cl}^{A,B} / E$ | Comput $V_{cl}^{A,B}$ | Expect $V_{cl}^{A,B}$ | $\Delta V_{cl}^{A,B}$ | $\Delta_{cl}^{A,B}$ | %-error |
| C1     | C2     | 78.3           | -5.43506E-04       | 65.9                  | 78.5                  | -12.5                 | -12.7               | -19.3   |
| C1     | O4     | -209.6         | 1.45392E-03        | -187.3                | -210.1                | 22.2                  | 22.8                | -12.2   |
| C1     | H7     | 19.7           | -1.36560E-04       | 22.4                  | 19.7                  | 2.7                   | 2.6                 | 11.7    |
| C1     | H9     | 18.4           | -1.27693E-04       | 21.1                  | 18.5                  | 2.7                   | 2.7                 | 12.7    |
| C2     | O3     | -221.2         | 1.53461E-03        | -199.1                | -221.8                | 22.1                  | 22.7                | -11.4   |
| C2     | H8     | 21.9           | -1.51739E-04       | 24.7                  | 21.9                  | 2.8                   | 2.8                 | 11.3    |
| C2     | H10    | 19.5           | -1.35299E-04       | 22.4                  | 19.6                  | 2.9                   | 2.8                 | 12.6    |
| O3     | H6     | -204.5         | 1.41879E-03        | -199.9                | -205.0                | 4.6                   | 5.1                 | -2.6    |
| O4     | H5     | -198.1         | 1.37395E-03        | -193.9                | -198.6                | 4.1                   | 4.6                 | -2.4    |
| O4     | H6     | -87.9          | 6.09474E-04        | -83.5                 | -88.1                 | 4.3                   | 4.5                 | -5.4    |

<sup>a</sup>) Classical components of interaction energies, differences  $\Delta V_{cl}^{A,B} = (V_{cl}^{A,B})_{B3LYP-GD3} - (V_{cl}^{A,B})_{CCSD/BBC1}$  and relative errors  $\Delta_{cl}^{A,B} = \text{Comput } V_{cl}^{A,B} - \text{Expect } V_{cl}^{A,B}$  are in kcal mol<sup>-1</sup>.

**Table S46.** Relative to the CCSD/BBC1 data, analysis of a classical component of interaction energies obtained at the MP2/Müller level for covalently bonded atom-pairs and the intramolecular O4...H6 interaction in the LEC of glycol.<sup>a</sup>

| Atom A | Atom B | CCSD/BBC1      |                    | MP2/Müller            |                       |                       |                     |         |
|--------|--------|----------------|--------------------|-----------------------|-----------------------|-----------------------|---------------------|---------|
|        |        | $V_{cl}^{A,B}$ | $V_{cl}^{A,B} / E$ | Comput $V_{cl}^{A,B}$ | Expect $V_{cl}^{A,B}$ | $\Delta V_{cl}^{A,B}$ | $\Delta_{cl}^{A,B}$ | %-error |
| C1     | C2     | 78.3           | -5.43506E-04       | 71.8                  | 78.3                  | -6.5                  | -6.5                | -9.1    |
| C1     | O4     | -209.6         | 1.45392E-03        | -196.8                | -209.5                | 12.7                  | 12.7                | -6.5    |
| C1     | H7     | 19.7           | -1.36560E-04       | 22.4                  | 19.7                  | 2.7                   | 2.7                 | 12.2    |
| C1     | H9     | 18.4           | -1.27693E-04       | 21.1                  | 18.4                  | 2.7                   | 2.7                 | 12.9    |
| C2     | O3     | -221.2         | 1.53461E-03        | -209.2                | -221.2                | 12.0                  | 12.0                | -5.7    |
| C2     | H8     | 21.9           | -1.51739E-04       | 24.7                  | 21.9                  | 2.8                   | 2.8                 | 11.3    |
| C2     | H10    | 19.5           | -1.35299E-04       | 22.3                  | 19.5                  | 2.8                   | 2.8                 | 12.4    |
| O3     | H6     | -204.5         | 1.41879E-03        | -210.7                | -204.5                | -6.2                  | -6.2                | 3.0     |
| O4     | H5     | -198.1         | 1.37395E-03        | -203.9                | -198.0                | -5.9                  | -5.9                | 2.9     |
| O4     | H6     | -87.9          | 6.09474E-04        | -90.2                 | -87.8                 | -2.3                  | -2.4                | 2.6     |

<sup>a</sup>) Classical components of interaction energies, differences  $\Delta V_{cl}^{A,B} = (V_{cl}^{A,B})_{B3LYP-GD3} - (V_{cl}^{A,B})_{CCSD/BBC1}$  and relative errors  $\Delta_{cl}^{A,B} = \text{Comput } V_{cl}^{A,B} - \text{Expect } V_{cl}^{A,B}$  are in kcal mol<sup>-1</sup>.

**Table S47.** Relative to the CCSD/BBC1 data, analysis of a classical component of interaction energies obtained at the HF level for covalently bonded atom-pairs in the **Lin** conformer of glycol.<sup>a</sup>

|        |        | CCSD/BBC1      |                    | HF                    |                       |                       |                     |         |
|--------|--------|----------------|--------------------|-----------------------|-----------------------|-----------------------|---------------------|---------|
| Atom A | Atom B | $V_{cl}^{A,B}$ | $V_{cl}^{A,B} / E$ | Comput $V_{cl}^{A,B}$ | Expect $V_{cl}^{A,B}$ | $\Delta V_{cl}^{A,B}$ | $\Delta_{cl}^{A,B}$ | %-error |
| C1     | C2     | 78.4           | -5.44002E-04       | 118.5                 | 78.2                  | 40.1                  | 40.4                | 34.1    |
| C1     | O4     | -215.8         | 1.49705E-03        | -328.6                | -215.1                | -112.8                | -113.5              | 34.5    |
| C1     | H7     | 19.3           | -1.33604E-04       | 8.9                   | 19.2                  | -10.3                 | -10.3               | -115.2  |
| C1     | H9     | 19.3           | -1.33604E-04       | 8.9                   | 19.2                  | -10.3                 | -10.3               | -115.1  |
| C2     | O3     | -215.8         | 1.49705E-03        | -328.6                | -215.1                | -112.8                | -113.5              | 34.5    |
| C2     | H8     | 19.3           | -1.33604E-04       | 8.9                   | 19.2                  | -10.3                 | -10.3               | -115.2  |
| C2     | H10    | 19.3           | -1.33604E-04       | 8.9                   | 19.2                  | -10.3                 | -10.3               | -115.1  |
| O3     | H6     | -196.3         | 1.36165E-03        | -241.1                | -195.6                | -44.8                 | -45.4               | 18.8    |
| O4     | H5     | -196.3         | 1.36165E-03        | -241.1                | -195.6                | -44.8                 | -45.4               | 18.8    |

<sup>a</sup>) Classical components of interaction energies, differences  $\Delta V_{cl}^{A,B} = (V_{cl}^{A,B})_{HF} - (V_{cl}^{A,B})_{CCSD/BBC1}$  and relative errors  $\Delta_{cl}^{A,B} = \text{Comput } V_{cl}^{A,B} - \text{Expect } V_{cl}^{A,B}$  are in kcal mol<sup>-1</sup>.

**Table S48.** Relative to the CCSD/BBC1 data, analysis of a classical component of interaction energies obtained at the B3LYP level for covalently bonded atom-pairs in the **Lin** conformer of glycol.<sup>a</sup>

|        |        | CCSD/BBC1      |                    | B3LYP                 |                       |                       |                     |         |
|--------|--------|----------------|--------------------|-----------------------|-----------------------|-----------------------|---------------------|---------|
| Atom A | Atom B | $V_{cl}^{A,B}$ | $V_{cl}^{A,B} / E$ | Comput $V_{cl}^{A,B}$ | Expect $V_{cl}^{A,B}$ | $\Delta V_{cl}^{A,B}$ | $\Delta_{cl}^{A,B}$ | %-error |
| C1     | C2     | 78.4           | -5.44002E-04       | 65.9                  | 78.6                  | -12.5                 | -12.7               | -19.2   |
| C1     | O4     | -215.8         | 1.49705E-03        | -194.5                | -216.3                | 21.3                  | 21.8                | -11.2   |
| C1     | H7     | 19.3           | -1.33604E-04       | 22.1                  | 19.3                  | 2.8                   | 2.8                 | 12.5    |
| C1     | H9     | 19.3           | -1.33604E-04       | 22.1                  | 19.3                  | 2.8                   | 2.8                 | 12.5    |
| C2     | O3     | -215.8         | 1.49705E-03        | -194.5                | -216.3                | 21.3                  | 21.8                | -11.2   |
| C2     | H8     | 19.3           | -1.33604E-04       | 22.1                  | 19.3                  | 2.8                   | 2.8                 | 12.5    |
| C2     | H10    | 19.3           | -1.33604E-04       | 22.1                  | 19.3                  | 2.8                   | 2.8                 | 12.5    |
| O3     | H6     | -196.3         | 1.36165E-03        | -192.7                | -196.8                | 3.6                   | 4.1                 | -2.1    |
| O4     | H5     | -196.3         | 1.36165E-03        | -192.7                | -196.8                | 3.6                   | 4.1                 | -2.1    |

<sup>a</sup>) Classical components of interaction energies, differences  $\Delta V_{cl}^{A,B} = (V_{cl}^{A,B})_{B3LYP} - (V_{cl}^{A,B})_{CCSD/BBC1}$  and relative errors  $\Delta_{cl}^{A,B} = \text{Comput } V_{cl}^{A,B} - \text{Expect } V_{cl}^{A,B}$  are in kcal mol<sup>-1</sup>.

**Table S49.** Relative to the CCSD/BBC1 data, analysis of a classical component of interaction energies obtained at the B3LYP-GD3 level for covalently bonded atom-pairs in the **Lin** conformer of glycol.<sup>a</sup>

| Atom A | Atom B | CCSD/BBC1      |                    | B3LYP-GD3             |                       |                       |                     |         |
|--------|--------|----------------|--------------------|-----------------------|-----------------------|-----------------------|---------------------|---------|
|        |        | $V_{cl}^{A,B}$ | $V_{cl}^{A,B} / E$ | Comput $V_{cl}^{A,B}$ | Expect $V_{cl}^{A,B}$ | $\Delta V_{cl}^{A,B}$ | $\Delta_{cl}^{A,B}$ | %-error |
| C1     | C2     | 78.4           | -5.44002E-04       | 65.8                  | 78.6                  | -12.6                 | -12.8               | -19.5   |
| C1     | O4     | -215.8         | 1.49705E-03        | -194.1                | -216.3                | 21.7                  | 22.2                | -11.5   |
| C1     | H7     | 19.3           | -1.33604E-04       | 22.1                  | 19.3                  | 2.8                   | 2.7                 | 12.5    |
| C1     | H9     | 19.3           | -1.33604E-04       | 22.1                  | 19.3                  | 2.8                   | 2.7                 | 12.5    |
| C2     | O3     | -215.8         | 1.49705E-03        | -194.1                | -216.3                | 21.7                  | 22.2                | -11.5   |
| C2     | H8     | 19.3           | -1.33604E-04       | 22.1                  | 19.3                  | 2.8                   | 2.7                 | 12.5    |
| C2     | H10    | 19.3           | -1.33604E-04       | 22.1                  | 19.3                  | 2.8                   | 2.7                 | 12.5    |
| O3     | H6     | -196.3         | 1.36165E-03        | -192.6                | -196.8                | 3.7                   | 4.2                 | -2.2    |
| O4     | H5     | -196.3         | 1.36165E-03        | -192.6                | -196.8                | 3.7                   | 4.2                 | -2.2    |

<sup>a</sup>) Classical components of interaction energies, differences  $\Delta V_{cl}^{A,B} = (V_{cl}^{A,B})_{B3LYP-GD3} - (V_{cl}^{A,B})_{CCSD/BBC1}$  and relative errors  $\Delta_{cl}^{A,B} = \text{Comput } V_{cl}^{A,B} - \text{Expect } V_{cl}^{A,B}$  are in kcal mol<sup>-1</sup>.

**Table S50.** Relative to the CCSD/BBC1 data, analysis of a classical component of interaction energies obtained at the MP2/Müller level for covalently bonded atom-pairs in the **Lin** conformer of glycol.<sup>a</sup>

| Atom A | Atom B | CCSD/BBC1      |                    | MP2/Müller            |                       |                       |                     |         |
|--------|--------|----------------|--------------------|-----------------------|-----------------------|-----------------------|---------------------|---------|
|        |        | $V_{cl}^{A,B}$ | $V_{cl}^{A,B} / E$ | Comput $V_{cl}^{A,B}$ | Expect $V_{cl}^{A,B}$ | $\Delta V_{cl}^{A,B}$ | $\Delta_{cl}^{A,B}$ | %-error |
| C1     | C2     | 78.4           | -5.44002E-04       | 71.9                  | 78.4                  | -6.6                  | -6.5                | -9.1    |
| C1     | O4     | -215.8         | 1.49705E-03        | -203.6                | -215.8                | 12.2                  | 12.2                | -6.0    |
| C1     | H7     | 19.3           | -1.33604E-04       | 22.0                  | 19.3                  | 2.8                   | 2.8                 | 12.5    |
| C1     | H9     | 19.3           | -1.33604E-04       | 22.0                  | 19.3                  | 2.8                   | 2.8                 | 12.5    |
| C2     | O3     | -215.8         | 1.49705E-03        | -203.6                | -215.8                | 12.2                  | 12.2                | -6.0    |
| C2     | H8     | 19.3           | -1.33604E-04       | 22.0                  | 19.3                  | 2.8                   | 2.8                 | 12.5    |
| C2     | H10    | 19.3           | -1.33604E-04       | 22.0                  | 19.3                  | 2.8                   | 2.8                 | 12.5    |
| O3     | H6     | -196.3         | 1.36165E-03        | -202.2                | -196.2                | -6.0                  | -6.0                | 3.0     |
| O4     | H5     | -196.3         | 1.36165E-03        | -202.2                | -196.2                | -5.9                  | -6.0                | 3.0     |

<sup>a</sup>) Classical components of interaction energies, differences  $\Delta V_{cl}^{A,B} = (V_{cl}^{A,B})_{MP2/Müller} - (V_{cl}^{A,B})_{CCSD/BBC1}$  and relative errors  $\Delta_{cl}^{A,B} = \text{Comput } V_{cl}^{A,B} - \text{Expect } V_{cl}^{A,B}$  are in kcal mol<sup>-1</sup>.



**Table S51.** Relative to the CCSD/BBC1 data, analysis of a classical component of interaction energies obtained at the HF level for covalently bonded atom-pairs and the intramolecular O3...O4 interaction in the **Ecl** conformer of glycol.<sup>a</sup>

|        |        | CCSD/BBC1      |                    | HF                    |                       |                       |                     |         |
|--------|--------|----------------|--------------------|-----------------------|-----------------------|-----------------------|---------------------|---------|
| Atom A | Atom B | $V_{cl}^{A,B}$ | $V_{cl}^{A,B} / E$ | Comput $V_{cl}^{A,B}$ | Expect $V_{cl}^{A,B}$ | $\Delta V_{cl}^{A,B}$ | $\Delta_{cl}^{A,B}$ | %-error |
| C1     | C2     | 81.7           | -5.66525E-04       | 125.0                 | 81.4                  | 43.3                  | 43.6                | 34.9    |
| C1     | O4     | -214.5         | 1.48848E-03        | -333.7                | -213.9                | -119.1                | -119.8              | 35.9    |
| C1     | H7     | 16.0           | -1.11135E-04       | 3.3                   | 16.0                  | -12.7                 | -12.7               | -383.6  |
| C1     | H9     | 16.0           | -1.11135E-04       | 3.3                   | 16.0                  | -12.7                 | -12.7               | -383.9  |
| C2     | O3     | -214.5         | 1.48848E-03        | -333.5                | -213.9                | -119.0                | -119.7              | 35.9    |
| C2     | H8     | 16.0           | -1.11135E-04       | 3.3                   | 16.0                  | -12.7                 | -12.7               | -382.3  |
| C2     | H10    | 16.0           | -1.11135E-04       | 3.3                   | 16.0                  | -12.7                 | -12.7               | -382.6  |
| O3     | H6     | -191.1         | 1.32558E-03        | -236.6                | -190.5                | -45.5                 | -46.2               | 19.5    |
| O4     | H5     | -191.1         | 1.32558E-03        | -236.6                | -190.5                | -45.5                 | -46.2               | 19.5    |
| O3     | O4     | 136.4          | -9.46659E-04       | 175.4                 | 136.0                 | 39.0                  | 39.4                | 22.5    |

<sup>a</sup>) Classical components of interaction energies, differences  $\Delta V_{cl}^{A,B} = (V_{cl}^{A,B})_{HF} - (V_{cl}^{A,B})_{CCSD/BBC1}$  and relative errors  $\Delta_{cl}^{A,B} = \text{Comput } V_{cl}^{A,B} - \text{Expect } V_{cl}^{A,B}$  are in kcal mol<sup>-1</sup>.

**Table S52.** Relative to the CCSD/BBC1 data, analysis of a classical component of interaction energies obtained at the B3LYP level for covalently bonded atom-pairs and the intramolecular O3...O4 interaction in the **Ecl** conformer of glycol.<sup>a</sup>

|        |        | CCSD/BBC1      |                    | B3LYP                 |                       |                       |                     |         |
|--------|--------|----------------|--------------------|-----------------------|-----------------------|-----------------------|---------------------|---------|
| Atom A | Atom B | $V_{cl}^{A,B}$ | $V_{cl}^{A,B} / E$ | Comput $V_{cl}^{A,B}$ | Expect $V_{cl}^{A,B}$ | $\Delta V_{cl}^{A,B}$ | $\Delta_{cl}^{A,B}$ | %-error |
| C1     | C2     | 81.7           | -5.66525E-04       | 69.5                  | 81.9                  | -12.1                 | -12.3               | -17.7   |
| C1     | O4     | -214.5         | 1.48848E-03        | -194.7                | -215.1                | 19.9                  | 20.4                | -10.5   |
| C1     | H7     | 16.0           | -1.11135E-04       | 19.4                  | 16.1                  | 3.3                   | 3.3                 | 17.0    |
| C1     | H9     | 16.0           | -1.11135E-04       | 19.4                  | 16.1                  | 3.3                   | 3.3                 | 17.0    |
| C2     | O3     | -214.5         | 1.48848E-03        | -194.6                | -215.1                | 19.9                  | 20.5                | -10.5   |
| C2     | H8     | 16.0           | -1.11135E-04       | 19.3                  | 16.1                  | 3.3                   | 3.3                 | 17.0    |
| C2     | H10    | 16.0           | -1.11135E-04       | 19.3                  | 16.1                  | 3.3                   | 3.3                 | 17.0    |
| O3     | H6     | -191.1         | 1.32558E-03        | -188.2                | -191.5                | 2.9                   | 3.3                 | -1.8    |
| O4     | H5     | -191.1         | 1.32558E-03        | -188.2                | -191.5                | 2.9                   | 3.3                 | -1.8    |
| O3     | O4     | 136.4          | -9.46659E-04       | 129.9                 | 136.8                 | -6.6                  | -6.9                | -5.3    |

<sup>a</sup>) Classical components of interaction energies, differences  $\Delta V_{cl}^{A,B} = (V_{cl}^{A,B})_{B3LYP} - (V_{cl}^{A,B})_{CCSD/BBC1}$  and relative errors  $\Delta_{cl}^{A,B} = \text{Comput } V_{cl}^{A,B} - \text{Expect } V_{cl}^{A,B}$  are in kcal mol<sup>-1</sup>.

**Table S53.** Relative to the CCSD/BBC1 data, analysis of a classical component of interaction energies obtained at the B3LYP-GD3 level for covalently bonded atom-pairs and the intramolecular O3...O4 interaction in the **Ecl** conformer of glycol.<sup>a</sup>

| Atom A | Atom B | CCSD/BBC1      |                    | B3LYP-GD3             |                       |                       |                     |         |
|--------|--------|----------------|--------------------|-----------------------|-----------------------|-----------------------|---------------------|---------|
|        |        | $V_{cl}^{A,B}$ | $V_{cl}^{A,B} / E$ | Comput $V_{cl}^{A,B}$ | Expect $V_{cl}^{A,B}$ | $\Delta V_{cl}^{A,B}$ | $\Delta_{cl}^{A,B}$ | %-error |
| C1     | C2     | 81.7           | -5.66525E-04       | 69.1                  | 81.9                  | -12.5                 | -12.8               | -18.4   |
| C1     | O4     | -214.5         | 1.48848E-03        | -193.9                | -215.1                | 20.7                  | 21.2                | -10.9   |
| C1     | H7     | 16.0           | -1.11135E-04       | 19.4                  | 16.1                  | 3.3                   | 3.3                 | 17.0    |
| C1     | H9     | 16.0           | -1.11135E-04       | 19.4                  | 16.1                  | 3.3                   | 3.3                 | 17.0    |
| C2     | O3     | -214.5         | 1.48848E-03        | -193.8                | -215.1                | 20.7                  | 21.3                | -11.0   |
| C2     | H8     | 16.0           | -1.11135E-04       | 19.4                  | 16.1                  | 3.3                   | 3.3                 | 17.0    |
| C2     | H10    | 16.0           | -1.11135E-04       | 19.4                  | 16.1                  | 3.3                   | 3.3                 | 17.0    |
| O3     | H6     | -191.1         | 1.32558E-03        | -188.1                | -191.6                | 3.0                   | 3.5                 | -1.8    |
| O4     | H5     | -191.1         | 1.32558E-03        | -188.1                | -191.6                | 3.0                   | 3.5                 | -1.8    |
| O3     | O4     | 136.4          | -9.46659E-04       | 129.7                 | 136.8                 | -6.8                  | -7.1                | -5.5    |

<sup>a</sup>) Classical components of interaction energies, differences  $\Delta V_{cl}^{A,B} = (V_{cl}^{A,B})_{B3LYP-GD3} - (V_{cl}^{A,B})_{CCSD/BBC1}$  and relative errors  $\Delta_{cl}^{A,B} = \text{Comput } V_{cl}^{A,B} - \text{Expect } V_{cl}^{A,B}$  are in kcal mol<sup>-1</sup>.

**Table S54.** Relative to the CCSD/BBC1 data, analysis of a classical component of interaction energies obtained at the MP2/Müller level for covalently bonded atom-pairs and the intramolecular O3...O4 interaction in the **Ecl** conformer of glycol.<sup>a</sup>

| Atom A | Atom B | CCSD/BBC1      |                    | MP2/Müller            |                       |                       |                     |         |
|--------|--------|----------------|--------------------|-----------------------|-----------------------|-----------------------|---------------------|---------|
|        |        | $V_{cl}^{A,B}$ | $V_{cl}^{A,B} / E$ | Comput $V_{cl}^{A,B}$ | Expect $V_{cl}^{A,B}$ | $\Delta V_{cl}^{A,B}$ | $\Delta_{cl}^{A,B}$ | %-error |
| C1     | C2     | 81.7           | -5.66525E-04       | 75.4                  | 81.6                  | -6.3                  | -6.3                | -8.3    |
| C1     | O4     | -214.5         | 1.48848E-03        | -202.8                | -214.5                | 11.7                  | 11.7                | -5.8    |
| C1     | H7     | 16.0           | -1.11135E-04       | 19.0                  | 16.0                  | 3.0                   | 3.0                 | 15.9    |
| C1     | H9     | 16.0           | -1.11135E-04       | 19.0                  | 16.0                  | 3.0                   | 3.0                 | 15.9    |
| C2     | O3     | -214.5         | 1.48848E-03        | -202.8                | -214.5                | 11.7                  | 11.7                | -5.8    |
| C2     | H8     | 16.0           | -1.11135E-04       | 19.0                  | 16.0                  | 3.0                   | 3.0                 | 15.9    |
| C2     | H10    | 16.0           | -1.11135E-04       | 19.0                  | 16.0                  | 3.0                   | 3.0                 | 15.9    |
| O3     | H6     | -191.1         | 1.32558E-03        | -196.8                | -191.0                | -5.7                  | -5.8                | 2.9     |
| O4     | H5     | -191.1         | 1.32558E-03        | -196.8                | -191.0                | -5.7                  | -5.8                | 2.9     |
| O3     | O4     | 136.4          | -9.46659E-04       | 136.0                 | 136.4                 | -0.5                  | -0.5                | -0.3    |

<sup>a</sup>) Classical components of interaction energies, differences  $\Delta V_{cl}^{A,B} = (V_{cl}^{A,B})_{MP2/Müller} - (V_{cl}^{A,B})_{CCSD/BBC1}$  and relative errors  $\Delta_{cl}^{A,B} = \text{Comput } V_{cl}^{A,B} - \text{Expect } V_{cl}^{A,B}$  are in kcal mol<sup>-1</sup>.

**Table S55.** Relative to the CCSD/BBC1 data, analysis of an exchange-correlation component of interaction energies obtained at the HF level for covalently bonded atom-pairs and the intramolecular O4...H6 interaction in the LEC of glycol.<sup>a</sup>

| Atom A | Atom B | CCSD/BBC1      |                    | HF                    |                       |                       |                     |         |
|--------|--------|----------------|--------------------|-----------------------|-----------------------|-----------------------|---------------------|---------|
|        |        | $V_{XC}^{A,B}$ | $V_{XC}^{A,B} / E$ | Comput $V_{XC}^{A,B}$ | Expect $V_{XC}^{A,B}$ | $\Delta V_{XC}^{A,B}$ | $\Delta_{XC}^{A,B}$ | %-error |
| C1     | C2     | -169.5         | 1.17614E-03        | -182.6                | -169.0                | -13.1                 | -13.6               | 7.5     |
| C1     | O4     | -153.6         | 1.06528E-03        | -151.8                | -153.1                | 1.7                   | 1.3                 | -0.8    |
| C1     | H7     | -157.1         | 1.08973E-03        | -175.0                | -156.6                | -18.0                 | -18.5               | 10.5    |
| C1     | H9     | -157.3         | 1.09106E-03        | -175.1                | -156.8                | -17.8                 | -18.3               | 10.5    |
| C2     | O3     | -157.4         | 1.09173E-03        | -154.8                | -156.9                | 2.6                   | 2.0                 | -1.3    |
| C2     | H8     | -157.5         | 1.09256E-03        | -175.0                | -157.0                | -17.5                 | -18.0               | 10.3    |
| C2     | H10    | -156.3         | 1.08458E-03        | -174.2                | -155.8                | -17.9                 | -18.4               | 10.6    |
| O3     | H6     | -114.2         | 7.92198E-04        | -116.6                | -113.8                | -2.4                  | -2.8                | 2.4     |
| O4     | H5     | -118.4         | 8.21311E-04        | -120.1                | -118.0                | -1.7                  | -2.1                | 1.7     |
| O4     | H6     | -3.0           | 2.10430E-05        | -1.3                  | -3.0                  | 1.8                   | 1.8                 | -139.0  |

<sup>a</sup>) Exchange-correlation components of interaction energies, differences  $\Delta V_{XC}^{A,B} = (V_{XC}^{A,B})_{HF} - (V_{XC}^{A,B})_{CCSD/BBC1}$  and relative errors  $\Delta_{XC}^{A,B} = \text{Comput } V_{XC}^{A,B} - \text{Expect } V_{XC}^{A,B}$  are in kcal mol<sup>-1</sup>.

**Table S56.** Relative to the CCSD/BBC1 data, analysis of an exchange-correlation component of interaction energies obtained at the B3LYP level for covalently bonded atom-pairs and the intramolecular O4...H6 interaction in the LEC of glycol.<sup>a</sup>

| Atom A | Atom B | CCSD/BBC1      |                    | B3LYP                 |                       |                       |                     |         |
|--------|--------|----------------|--------------------|-----------------------|-----------------------|-----------------------|---------------------|---------|
|        |        | $V_{XC}^{A,B}$ | $V_{XC}^{A,B} / E$ | Comput $V_{XC}^{A,B}$ | Expect $V_{XC}^{A,B}$ | $\Delta V_{XC}^{A,B}$ | $\Delta_{XC}^{A,B}$ | %-error |
| C1     | C2     | -169.5         | 1.17614E-03        | -183.3                | -170.0                | -13.8                 | -13.4               | 7.3     |
| C1     | O4     | -153.6         | 1.06528E-03        | -164.7                | -153.9                | -11.1                 | -10.7               | 6.5     |
| C1     | H7     | -157.1         | 1.08973E-03        | -171.8                | -157.5                | -14.8                 | -14.4               | 8.4     |
| C1     | H9     | -157.3         | 1.09106E-03        | -171.9                | -157.7                | -14.6                 | -14.2               | 8.3     |
| C2     | O3     | -157.4         | 1.09173E-03        | -168.7                | -157.8                | -11.4                 | -11.0               | 6.5     |
| C2     | H8     | -157.5         | 1.09256E-03        | -171.9                | -157.9                | -14.4                 | -14.0               | 8.2     |
| C2     | H10    | -156.3         | 1.08458E-03        | -170.8                | -156.7                | -14.4                 | -14.0               | 8.2     |
| O3     | H6     | -114.2         | 7.92198E-04        | -121.8                | -114.5                | -7.6                  | -7.3                | 6.0     |
| O4     | H5     | -118.4         | 8.21311E-04        | -125.6                | -118.7                | -7.2                  | -6.9                | 5.5     |
| O4     | H6     | -3.0           | 2.10430E-05        | -2.3                  | -3.0                  | 0.8                   | 0.8                 | -34.3   |

<sup>a</sup>) Exchange-correlation components of interaction energies, differences  $\Delta V_{XC}^{A,B} = (V_{XC}^{A,B})_{B3LYP} - (V_{XC}^{A,B})_{CCSD/BBC1}$  and relative errors  $\Delta_{XC}^{A,B} = \text{Comput } V_{XC}^{A,B} - \text{Expect } V_{XC}^{A,B}$  are in kcal mol<sup>-1</sup>.

**Table S57.** Relative to the CCSD/BBC1 data, analysis of an exchange-correlation component of interaction energies obtained at the B3LYP-GD3 level for covalently bonded atom-pairs and the intramolecular O4...H6 interaction in the LEC of glycol.<sup>a</sup>

| Atom A | Atom B | CCSD/BBC1      |                    | B3LYP-GD3             |                       |                       |                     |         |
|--------|--------|----------------|--------------------|-----------------------|-----------------------|-----------------------|---------------------|---------|
|        |        | $V_{XC}^{A,B}$ | $V_{XC}^{A,B} / E$ | Comput $V_{XC}^{A,B}$ | Expect $V_{XC}^{A,B}$ | $\Delta V_{XC}^{A,B}$ | $\Delta_{XC}^{A,B}$ | %-error |
| C1     | C2     | -169.5         | 1.17614E-03        | -183.3                | -170.0                | -13.7                 | -13.3               | 7.2     |
| C1     | O4     | -153.6         | 1.06528E-03        | -164.6                | -153.9                | -11.0                 | -10.6               | 6.5     |
| C1     | H7     | -157.1         | 1.08973E-03        | -171.8                | -157.5                | -14.7                 | -14.3               | 8.3     |
| C1     | H9     | -157.3         | 1.09106E-03        | -171.8                | -157.7                | -14.6                 | -14.2               | 8.2     |
| C2     | O3     | -157.4         | 1.09173E-03        | -168.6                | -157.8                | -11.3                 | -10.9               | 6.4     |
| C2     | H8     | -157.5         | 1.09256E-03        | -171.9                | -157.9                | -14.4                 | -14.0               | 8.2     |
| C2     | H10    | -156.3         | 1.08458E-03        | -170.7                | -156.7                | -14.4                 | -14.0               | 8.2     |
| O3     | H6     | -114.2         | 7.92198E-04        | -121.9                | -114.5                | -7.7                  | -7.4                | 6.1     |
| O4     | H5     | -118.4         | 8.21311E-04        | -125.6                | -118.7                | -7.2                  | -6.9                | 5.5     |
| O4     | H6     | -3.0           | 2.10430E-05        | -2.2                  | -3.0                  | 0.8                   | 0.8                 | -37.2   |

<sup>a</sup>) Exchange-correlation components of interaction energies, differences  $\Delta V_{XC}^{A,B} = (V_{XC}^{A,B})_{B3LYP-GD3} - (V_{XC}^{A,B})_{CCSD/BBC1}$  and relative errors  $\Delta_{XC}^{A,B} = \text{Comput } V_{XC}^{A,B} - \text{Expect } V_{XC}^{A,B}$  are in kcal mol<sup>-1</sup>.

**Table S58.** Relative to the CCSD/BBC1 data, analysis of an exchange-correlation component of interaction energies obtained at the MP2/Müller level for covalently bonded atom-pairs and the intramolecular O4...H6 interaction in the LEC of glycol.<sup>a</sup>

| Atom A | Atom B | CCSD/BBC1      |                    | MP2/Müller            |                       |                       |                     |         |
|--------|--------|----------------|--------------------|-----------------------|-----------------------|-----------------------|---------------------|---------|
|        |        | $V_{XC}^{A,B}$ | $V_{XC}^{A,B} / E$ | Comput $V_{XC}^{A,B}$ | Expect $V_{XC}^{A,B}$ | $\Delta V_{XC}^{A,B}$ | $\Delta_{XC}^{A,B}$ | %-error |
| C1     | C2     | -169.5         | 1.17614E-03        | -171.0                | -169.5                | -1.5                  | -1.5                | 0.9     |
| C1     | O4     | -153.6         | 1.06528E-03        | -155.6                | -153.5                | -2.0                  | -2.0                | 1.3     |
| C1     | H7     | -157.1         | 1.08973E-03        | -161.8                | -157.1                | -4.7                  | -4.8                | 2.9     |
| C1     | H9     | -157.3         | 1.09106E-03        | -161.9                | -157.2                | -4.7                  | -4.7                | 2.9     |
| C2     | O3     | -157.4         | 1.09173E-03        | -159.4                | -157.3                | -2.0                  | -2.1                | 1.3     |
| C2     | H8     | -157.5         | 1.09256E-03        | -161.9                | -157.5                | -4.4                  | -4.4                | 2.7     |
| C2     | H10    | -156.3         | 1.08458E-03        | -160.8                | -156.3                | -4.5                  | -4.5                | 2.8     |
| O3     | H6     | -114.2         | 7.92198E-04        | -114.2                | -114.2                | 0.0                   | 0.0                 | 0.0     |
| O4     | H5     | -118.4         | 8.21311E-04        | -117.8                | -118.4                | 0.6                   | 0.5                 | -0.5    |
| O4     | H6     | -3.0           | 2.10430E-05        | -2.7                  | -3.0                  | 0.3                   | 0.3                 | -10.3   |

<sup>a</sup>) Exchange-correlation components of interaction energies, differences  $\Delta V_{XC}^{A,B} = (V_{XC}^{A,B})_{MP2/Müller} - (V_{XC}^{A,B})_{CCSD/BBC1}$  and relative errors  $\Delta_{XC}^{A,B} = \text{Comput } V_{XC}^{A,B} - \text{Expect } V_{XC}^{A,B}$  are in kcal mol<sup>-1</sup>.

**Table S59.** Relative to the CCSD/BBC1 data, analysis of an exchange-correlation component of interaction energies obtained at the HF level for covalently bonded atom-pairs in the **Lin** conformer of glycol.<sup>a</sup>

|        |        | CCSD/BBC1      |                    | HF                    |                       |                       |                     |         |
|--------|--------|----------------|--------------------|-----------------------|-----------------------|-----------------------|---------------------|---------|
| Atom A | Atom B | $V_{XC}^{A,B}$ | $V_{XC}^{A,B} / E$ | Comput $V_{XC}^{A,B}$ | Expect $V_{XC}^{A,B}$ | $\Delta V_{XC}^{A,B}$ | $\Delta_{XC}^{A,B}$ | %-error |
| C1     | C2     | -168.3         | 1.16750E-03        | -181.2                | -167.8                | -12.9                 | -13.5               | 7.4     |
| C1     | O4     | -154.8         | 1.07414E-03        | -153.0                | -154.3                | 1.8                   | 1.3                 | -0.9    |
| C1     | H7     | -157.0         | 1.08904E-03        | -175.0                | -156.5                | -18.0                 | -18.5               | 10.6    |
| C1     | H9     | -157.0         | 1.08904E-03        | -175.0                | -156.5                | -18.0                 | -18.5               | 10.6    |
| C2     | O3     | -154.8         | 1.07414E-03        | -153.0                | -154.3                | 1.8                   | 1.3                 | -0.9    |
| C2     | H8     | -157.0         | 1.08904E-03        | -175.0                | -156.5                | -18.0                 | -18.5               | 10.6    |
| C2     | H10    | -157.0         | 1.08904E-03        | -175.0                | -156.5                | -18.0                 | -18.5               | 10.6    |
| O3     | H6     | -118.1         | 8.19130E-04        | -120.7                | -117.7                | -2.6                  | -3.0                | 2.5     |
| O4     | H5     | -118.1         | 8.19130E-04        | -120.7                | -117.7                | -2.6                  | -3.0                | 2.5     |

<sup>a</sup>) Exchange-correlation components of interaction energies, differences  $\Delta V_{XC}^{A,B} = (V_{XC}^{A,B})_{HF} - (V_{XC}^{A,B})_{CCSD/BBC1}$  and relative errors  $\Delta_{XC}^{A,B} = \text{Comput } V_{XC}^{A,B} - \text{Expect } V_{XC}^{A,B}$  are in kcal mol<sup>-1</sup>.

**Table S60.** Relative to the CCSD/BBC1 data, analysis of an exchange-correlation component of interaction energies obtained at the B3LYP level for covalently bonded atom-pairs in the **Lin** conformer of glycol.<sup>a</sup>

|        |        | CCSD/BBC1      |                    | B3LYP                 |                       |                       |                     |         |
|--------|--------|----------------|--------------------|-----------------------|-----------------------|-----------------------|---------------------|---------|
| Atom A | Atom B | $V_{XC}^{A,B}$ | $V_{XC}^{A,B} / E$ | Comput $V_{XC}^{A,B}$ | Expect $V_{XC}^{A,B}$ | $\Delta V_{XC}^{A,B}$ | $\Delta_{XC}^{A,B}$ | %-error |
| C1     | C2     | -168.3         | 1.16750E-03        | -181.5                | -168.7                | -13.2                 | -12.8               | 7.0     |
| C1     | O4     | -154.8         | 1.07414E-03        | -166.5                | -155.2                | -11.7                 | -11.3               | 6.8     |
| C1     | H7     | -157.0         | 1.08904E-03        | -171.8                | -157.4                | -14.8                 | -14.4               | 8.4     |
| C1     | H9     | -157.0         | 1.08904E-03        | -171.7                | -157.4                | -14.8                 | -14.4               | 8.4     |
| C2     | O3     | -154.8         | 1.07414E-03        | -166.5                | -155.2                | -11.7                 | -11.3               | 6.8     |
| C2     | H8     | -157.0         | 1.08904E-03        | -171.8                | -157.4                | -14.8                 | -14.4               | 8.4     |
| C2     | H10    | -157.0         | 1.08904E-03        | -171.7                | -157.4                | -14.8                 | -14.4               | 8.4     |
| O3     | H6     | -118.1         | 8.19130E-04        | -126.3                | -118.4                | -8.2                  | -7.9                | 6.3     |
| O4     | H5     | -118.1         | 8.19130E-04        | -126.3                | -118.4                | -8.2                  | -7.9                | 6.3     |

<sup>a</sup>) Exchange-correlation components of interaction energies, differences  $\Delta V_{XC}^{A,B} = (V_{XC}^{A,B})_{B3LYP} - (V_{XC}^{A,B})_{CCSD/BBC1}$  and relative errors  $\Delta_{XC}^{A,B} = \text{Comput } V_{XC}^{A,B} - \text{Expect } V_{XC}^{A,B}$  are in kcal mol<sup>-1</sup>.

**Table S61.** Relative to the CCSD/BBC1 data, analysis of an exchange-correlation component of interaction energies obtained at the B3LYP-GD3 level for covalently bonded atom-pairs in the **Lin** conformer of glycol.<sup>a</sup>

| Atom A | Atom B | CCSD/BBC1      |                    | B3LYP-GD3             |                       |                       |                     |         |
|--------|--------|----------------|--------------------|-----------------------|-----------------------|-----------------------|---------------------|---------|
|        |        | $V_{XC}^{A,B}$ | $V_{XC}^{A,B} / E$ | Comput $V_{XC}^{A,B}$ | Expect $V_{XC}^{A,B}$ | $\Delta V_{XC}^{A,B}$ | $\Delta_{XC}^{A,B}$ | %-error |
| C1     | C2     | -168.3         | 1.16750E-03        | -181.4                | -168.7                | -13.1                 | -12.7               | 7.0     |
| C1     | O4     | -154.8         | 1.07414E-03        | -166.5                | -155.2                | -11.7                 | -11.3               | 6.8     |
| C1     | H7     | -157.0         | 1.08904E-03        | -171.7                | -157.4                | -14.7                 | -14.3               | 8.3     |
| C1     | H9     | -157.0         | 1.08904E-03        | -171.7                | -157.4                | -14.7                 | -14.3               | 8.3     |
| C2     | O3     | -154.8         | 1.07414E-03        | -166.5                | -155.2                | -11.7                 | -11.3               | 6.8     |
| C2     | H8     | -157.0         | 1.08904E-03        | -171.7                | -157.4                | -14.7                 | -14.3               | 8.3     |
| C2     | H10    | -157.0         | 1.08904E-03        | -171.7                | -157.4                | -14.7                 | -14.3               | 8.3     |
| O3     | H6     | -118.1         | 8.19130E-04        | -126.3                | -118.4                | -8.2                  | -7.9                | 6.3     |
| O4     | H5     | -118.1         | 8.19130E-04        | -126.3                | -118.4                | -8.2                  | -7.9                | 6.3     |

<sup>a</sup>) Exchange-correlation components of interaction energies, differences  $\Delta V_{XC}^{A,B} = (V_{XC}^{A,B})_{B3LYP-GD3} - (V_{XC}^{A,B})_{CCSD/BBC1}$  and relative errors  $\Delta_{XC}^{A,B} = \text{Comput } V_{XC}^{A,B} - \text{Expect } V_{XC}^{A,B}$  are in kcal mol<sup>-1</sup>.

**Table S62.** Relative to the CCSD/BBC1 data, analysis of an exchange-correlation component of interaction energies obtained at the MP2/Müller level for covalently bonded atom-pairs in the **Lin** conformer of glycol.<sup>a</sup>

| Atom A | Atom B | CCSD/BBC1      |                    | MP2/Müller            |                       |                       |                     |         |
|--------|--------|----------------|--------------------|-----------------------|-----------------------|-----------------------|---------------------|---------|
|        |        | $V_{XC}^{A,B}$ | $V_{XC}^{A,B} / E$ | Comput $V_{XC}^{A,B}$ | Expect $V_{XC}^{A,B}$ | $\Delta V_{XC}^{A,B}$ | $\Delta_{XC}^{A,B}$ | %-error |
| C1     | C2     | -168.3         | 1.16750E-03        | -168.3                | -169.2                | -168.3                | -0.9                | 0.5     |
| C1     | O4     | -154.8         | 1.07414E-03        | -154.8                | -157.4                | -154.8                | -2.6                | 1.7     |
| C1     | H7     | -157.0         | 1.08904E-03        | -157.0                | -161.7                | -157.0                | -4.8                | 3.0     |
| C1     | H9     | -157.0         | 1.08904E-03        | -157.0                | -161.7                | -157.0                | -4.7                | 3.0     |
| C2     | O3     | -154.8         | 1.07414E-03        | -154.8                | -157.4                | -154.8                | -2.6                | 1.7     |
| C2     | H8     | -157.0         | 1.08904E-03        | -157.0                | -161.7                | -157.0                | -4.8                | 3.0     |
| C2     | H10    | -157.0         | 1.08904E-03        | -157.0                | -161.7                | -157.0                | -4.7                | 3.0     |
| O3     | H6     | -118.1         | 8.19130E-04        | -118.1                | -118.5                | -118.1                | -0.4                | 0.4     |
| O4     | H5     | -118.1         | 8.19130E-04        | -118.1                | -118.5                | -118.1                | -0.4                | 0.4     |

<sup>a</sup>) Exchange-correlation components of interaction energies, differences  $\Delta V_{XC}^{A,B} = (V_{XC}^{A,B})_{MP2/Müller} - (V_{XC}^{A,B})_{CCSD/BBC1}$  and relative errors  $\Delta_{XC}^{A,B} = \text{Comput } V_{XC}^{A,B} - \text{Expect } V_{XC}^{A,B}$  are in kcal mol<sup>-1</sup>.

**Table S63.** Relative to the CCSD/BBC1 data, analysis of an exchange-correlation component of interaction energies obtained at the HF level for covalently bonded atom-pairs and the intramolecular O3...O4 interaction in the **Ecl** conformer of glycol.<sup>a</sup>

| Atom A | Atom B | CCSD/BBC1      |                    | HF                    |                       |                       |                     |         |
|--------|--------|----------------|--------------------|-----------------------|-----------------------|-----------------------|---------------------|---------|
|        |        | $V_{XC}^{A,B}$ | $V_{XC}^{A,B} / E$ | Comput $V_{XC}^{A,B}$ | Expect $V_{XC}^{A,B}$ | $\Delta V_{XC}^{A,B}$ | $\Delta_{XC}^{A,B}$ | %-error |
| C1     | C2     | -162.7         | 1.12847E-03        | -176.1                | -162.1                | -13.5                 | -14.0               | 8.0     |
| C1     | O4     | -157.5         | 1.09282E-03        | -156.1                | -157.0                | 1.4                   | 0.9                 | -0.6    |
| C1     | H7     | -157.3         | 1.09146E-03        | -175.1                | -156.8                | -17.7                 | -18.2               | 10.4    |
| C1     | H9     | -157.3         | 1.09146E-03        | -175.1                | -156.8                | -17.7                 | -18.2               | 10.4    |
| C2     | O3     | -157.5         | 1.09282E-03        | -156.2                | -157.0                | 1.3                   | 0.8                 | -0.5    |
| C2     | H8     | -157.3         | 1.09146E-03        | -175.1                | -156.8                | -17.8                 | -18.3               | 10.4    |
| C2     | H10    | -157.3         | 1.09146E-03        | -175.1                | -156.8                | -17.7                 | -18.2               | 10.4    |
| O3     | H6     | -118.9         | 8.25117E-04        | -121.8                | -118.5                | -2.9                  | -3.3                | 2.7     |
| O4     | H5     | -118.9         | 8.25117E-04        | -121.8                | -118.5                | -2.9                  | -3.3                | 2.7     |
| O3     | O4     | -15.3          | 1.05859E-04        | -7.3                  | -15.2                 | 7.9                   | 7.9                 | -107.7  |

<sup>a</sup>) Exchange-correlation components of interaction energies, differences  $\Delta V_{XC}^{A,B} = (V_{XC}^{A,B})_{HF} - (V_{XC}^{A,B})_{CCSD/BBC1}$  and relative errors  $\Delta_{XC}^{A,B} = \text{Comput } V_{XC}^{A,B} - \text{Expect } V_{XC}^{A,B}$  are in kcal mol<sup>-1</sup>.

**Table S64.** Relative to the CCSD/BBC1 data, analysis of an exchange-correlation component of interaction energies obtained at the B3LYP level for covalently bonded atom-pairs and the intramolecular O3...O4 interaction in the **Ecl** conformer of glycol.<sup>a</sup>

| Atom A | Atom B | CCSD/BBC1      |                    | B3LYP                 |                       |                       |                     |         |
|--------|--------|----------------|--------------------|-----------------------|-----------------------|-----------------------|---------------------|---------|
|        |        | $V_{XC}^{A,B}$ | $V_{XC}^{A,B} / E$ | Comput $V_{XC}^{A,B}$ | Expect $V_{XC}^{A,B}$ | $\Delta V_{XC}^{A,B}$ | $\Delta_{XC}^{A,B}$ | %-error |
| C1     | C2     | -162.7         | 1.12847E-03        | -175.8                | -163.1                | -13.1                 | -12.7               | 7.2     |
| C1     | O4     | -157.5         | 1.09282E-03        | -169.9                | -157.9                | -12.4                 | -12.0               | 7.0     |
| C1     | H7     | -157.3         | 1.09146E-03        | -172.4                | -157.7                | -15.1                 | -14.7               | 8.5     |
| C1     | H9     | -157.3         | 1.09146E-03        | -172.4                | -157.7                | -15.1                 | -14.7               | 8.5     |
| C2     | O3     | -157.5         | 1.09282E-03        | -169.9                | -157.9                | -12.4                 | -12.0               | 7.1     |
| C2     | H8     | -157.3         | 1.09146E-03        | -172.4                | -157.7                | -15.1                 | -14.7               | 8.5     |
| C2     | H10    | -157.3         | 1.09146E-03        | -172.4                | -157.7                | -15.1                 | -14.7               | 8.5     |
| O3     | H6     | -118.9         | 8.25117E-04        | -127.2                | -119.2                | -8.2                  | -7.9                | 6.2     |
| O4     | H5     | -118.9         | 8.25117E-04        | -127.2                | -119.2                | -8.2                  | -7.9                | 6.2     |
| O3     | O4     | -15.3          | 1.05859E-04        | -8.4                  | -15.3                 | 6.8                   | 6.9                 | -81.4   |

<sup>a</sup>) Exchange-correlation components of interaction energies, differences  $\Delta V_{XC}^{A,B} = (V_{XC}^{A,B})_{B3LYP} - (V_{XC}^{A,B})_{CCSD/BBC1}$  and relative errors  $\Delta_{XC}^{A,B} = \text{Comput } V_{XC}^{A,B} - \text{Expect } V_{XC}^{A,B}$  are in kcal mol<sup>-1</sup>.

**Table S65.** Relative to the CCSD/BBC1 data, analysis of an exchange-correlation component of interaction energies obtained at the B3LYP-GD3 level for covalently bonded atom-pairs and the intramolecular O3...O4 interaction in the **Ecl** conformer.<sup>a</sup>

|        |        | CCSD/BBC1      |                    | B3LYP-GD3             |                       |                       |                     |         |
|--------|--------|----------------|--------------------|-----------------------|-----------------------|-----------------------|---------------------|---------|
| Atom A | Atom B | $V_{XC}^{A,B}$ | $V_{XC}^{A,B} / E$ | Comput $V_{XC}^{A,B}$ | Expect $V_{XC}^{A,B}$ | $\Delta V_{XC}^{A,B}$ | $\Delta_{XC}^{A,B}$ | %-error |
| C1     | C2     | -162.7         | 1.12847E-03        | -175.5                | -163.1                | -12.9                 | -12.5               | 7.1     |
| C1     | O4     | -157.5         | 1.09282E-03        | -169.8                | -157.9                | -12.3                 | -11.9               | 7.0     |
| C1     | H7     | -157.3         | 1.09146E-03        | -172.3                | -157.7                | -15.0                 | -14.6               | 8.5     |
| C1     | H9     | -157.3         | 1.09146E-03        | -172.3                | -157.7                | -15.0                 | -14.6               | 8.5     |
| C2     | O3     | -157.5         | 1.09282E-03        | -169.9                | -157.9                | -12.4                 | -12.0               | 7.0     |
| C2     | H8     | -157.3         | 1.09146E-03        | -172.3                | -157.7                | -15.0                 | -14.6               | 8.5     |
| C2     | H10    | -157.3         | 1.09146E-03        | -172.3                | -157.7                | -15.0                 | -14.6               | 8.5     |
| O3     | H6     | -118.9         | 8.25117E-04        | -127.1                | -119.2                | -8.2                  | -7.9                | 6.2     |
| O4     | H5     | -118.9         | 8.25117E-04        | -127.1                | -119.2                | -8.2                  | -7.9                | 6.2     |
| O3     | O4     | -15.3          | 1.05859E-04        | -8.4                  | -15.3                 | 6.8                   | 6.9                 | -81.4   |

<sup>a</sup>) Exchange-correlation components of interaction energies, differences  $\Delta V_{XC}^{A,B} = (V_{XC}^{A,B})_{B3LYP-GD3} - (V_{XC}^{A,B})_{CCSD/BBC1}$  and relative errors  $\Delta_{XC}^{A,B} = \text{Comput } V_{XC}^{A,B} - \text{Expect } V_{XC}^{A,B}$  are in kcal mol<sup>-1</sup>.

**Table S66.** Relative to the CCSD/BBC1 data, analysis of an exchange-correlation component of interaction energies obtained at the MP2/Müller level for covalently bonded atom-pairs and the intramolecular O3...O4 interaction in the **Ecl** conformer.<sup>a</sup>

|        |        | CCSD/BBC1      |                    | MP2/Müller            |                       |                       |                     |         |
|--------|--------|----------------|--------------------|-----------------------|-----------------------|-----------------------|---------------------|---------|
| Atom A | Atom B | $V_{XC}^{A,B}$ | $V_{XC}^{A,B} / E$ | Comput $V_{XC}^{A,B}$ | Expect $V_{XC}^{A,B}$ | $\Delta V_{XC}^{A,B}$ | $\Delta_{XC}^{A,B}$ | %-error |
| C1     | C2     | -162.7         | 1.12847E-03        | -163.3                | -162.6                | -0.6                  | -0.6                | 0.4     |
| C1     | O4     | -157.5         | 1.09282E-03        | -160.1                | -157.5                | -2.6                  | -2.6                | 1.6     |
| C1     | H7     | -157.3         | 1.09146E-03        | -162.3                | -157.3                | -5.0                  | -5.0                | 3.1     |
| C1     | H9     | -157.3         | 1.09146E-03        | -162.3                | -157.3                | -5.0                  | -5.0                | 3.1     |
| C2     | O3     | -157.5         | 1.09282E-03        | -160.1                | -157.5                | -2.6                  | -2.7                | 1.7     |
| C2     | H8     | -157.3         | 1.09146E-03        | -162.3                | -157.3                | -4.9                  | -5.0                | 3.1     |
| C2     | H10    | -157.3         | 1.09146E-03        | -162.3                | -157.3                | -5.0                  | -5.0                | 3.1     |
| O3     | H6     | -118.9         | 8.25117E-04        | -119.5                | -118.9                | -0.6                  | -0.6                | 0.5     |
| O4     | H5     | -118.9         | 8.25117E-04        | -119.5                | -118.9                | -0.6                  | -0.6                | 0.5     |
| O3     | O4     | -15.3          | 1.05859E-04        | -9.2                  | -15.3                 | 6.1                   | 6.1                 | -66.1   |

<sup>a</sup>) Exchange-correlation components of interaction energies, differences  $\Delta V_{XC}^{A,B} = (V_{XC}^{A,B})_{MP2/Müller} - (V_{XC}^{A,B})_{CCSD/BBC1}$  and relative errors  $\Delta_{XC}^{A,B} = \text{Comput } V_{XC}^{A,B} - \text{Expect } V_{XC}^{A,B}$  are in kcal/mol.



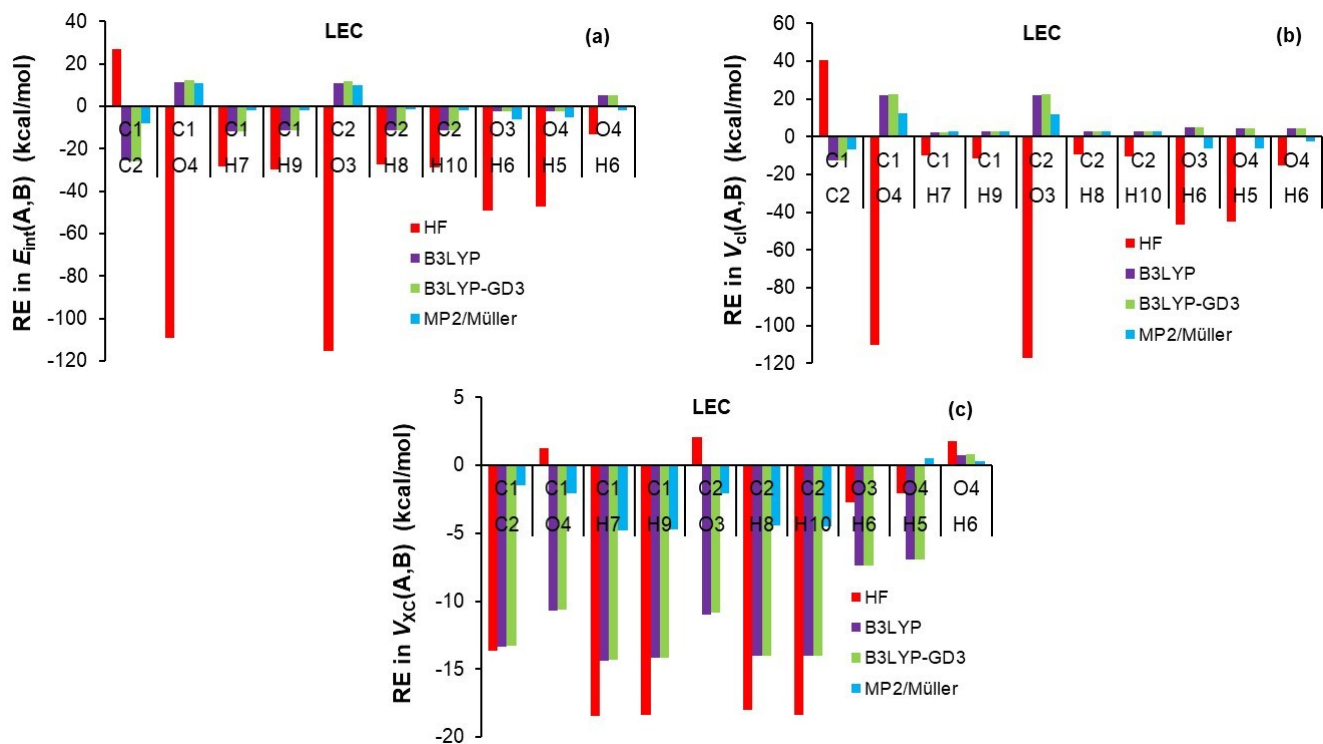

**Figure S6.** Using CCSD/BBC1 data as a reference, relative errors (RE) obtained at the indicated levels of theory in the interaction energy (Part (a)) as well as its components (classical in Part (b) and XC-term in Part (c)) computed for covalently bonded atoms and the intramolecular O4...H6 interaction in the lowest energy conformer (LEC) of glycol.

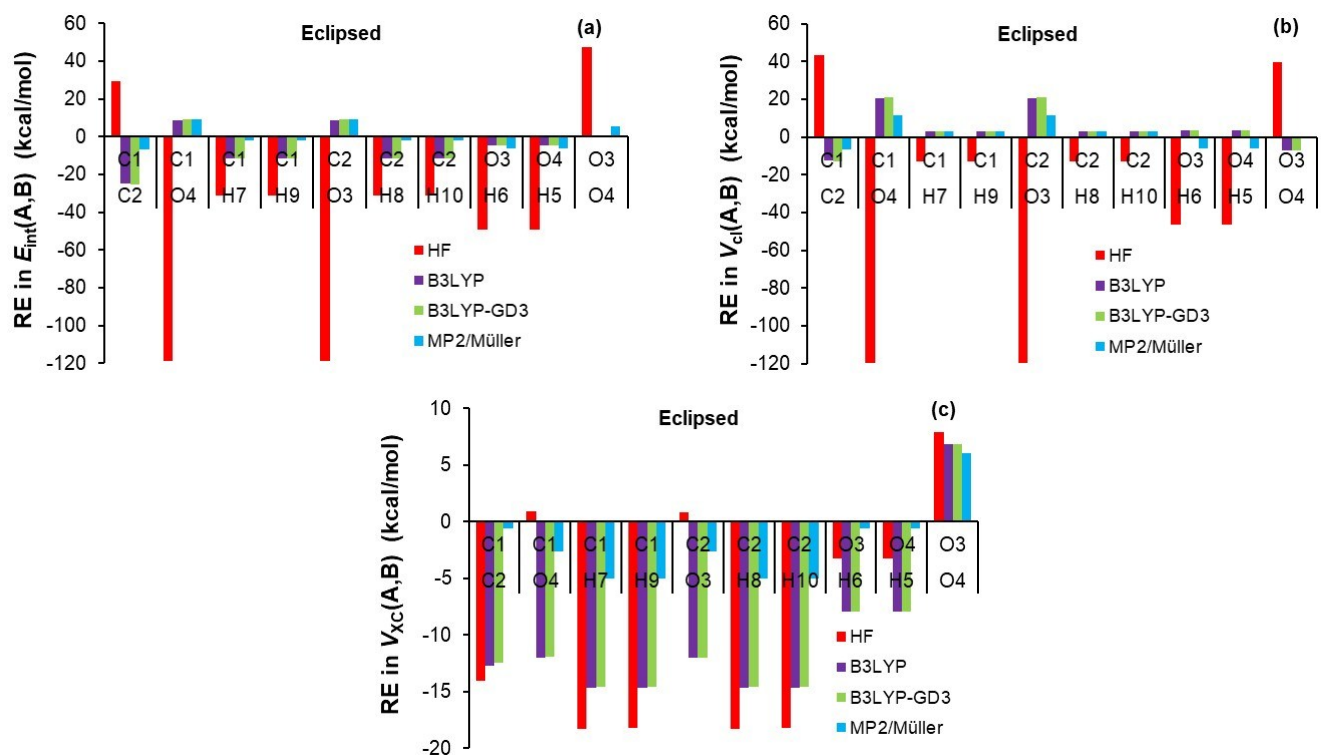

**Figure S7.** Using CCSD/BBC1 data as a reference, relative errors (RE) obtained at the indicated levels of theory in the interaction energy (Part (a)) as well as its components (classical in Part (b) and XC-term in Part (c)) computed for covalently bonded atoms and the intramolecular O3...O4 interaction in the eclipsed conformer of glycol.

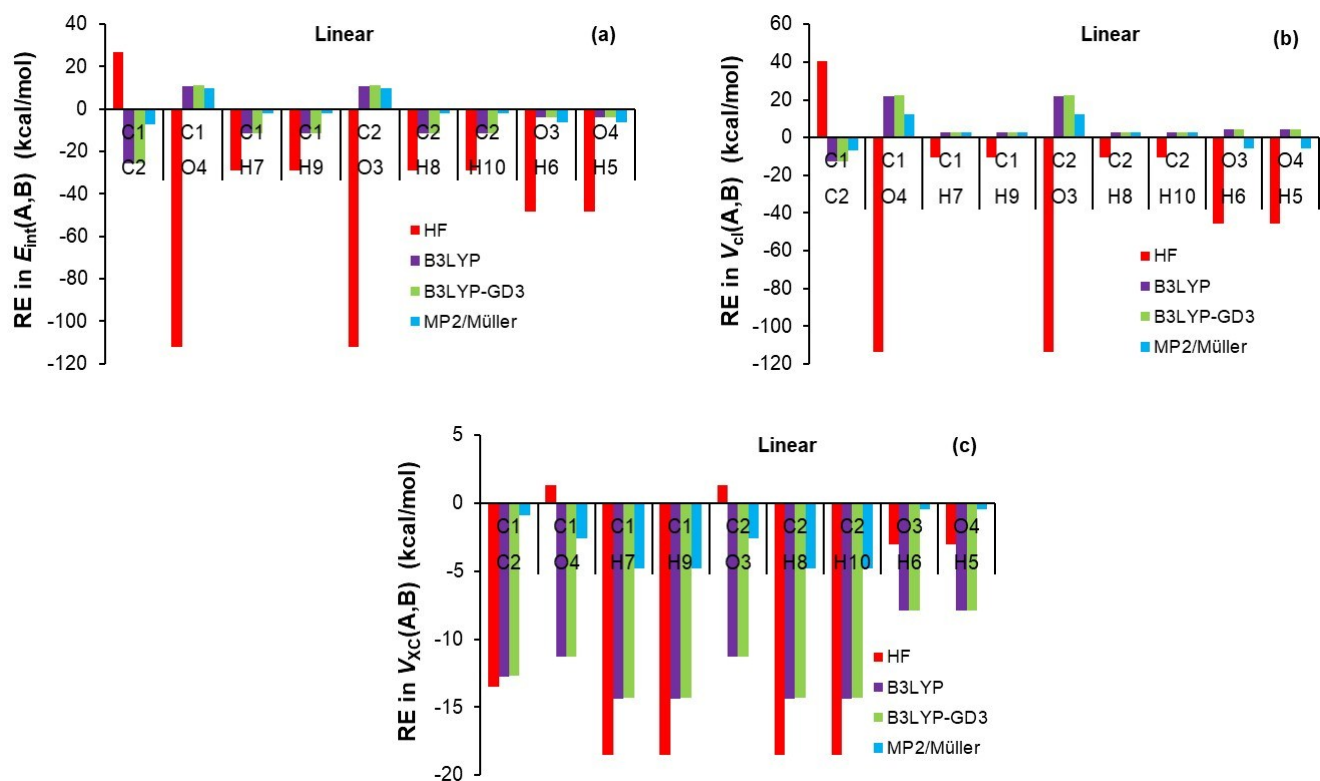

**Figure S8.** Using CCSD/BBC1 data as a reference, relative errors (RE) obtained at the indicated levels of theory in the interaction energy (Part (a)) as well as its components (classical in Part (b) and XC-term in Part (c)) computed for covalently bonded atoms in the linear conformer of glycol.

**Table S67.** Combined analysis of relative errors,  $\Delta_{\text{int}}^{\text{A,B}}$ , in the computed diatomic interaction energies,  $^{\text{Comput}} E_{\text{int}}^{\text{A,B}}$ , of covalently bonded atoms for each conformer of glycol at the indicated levels of theory. Data for C–C bonds is shown in Part A; for C–O bonds in Part B; for C–H bonds in Part C; for O–H bonds in Part D. All values are in kcal mol<sup>-1</sup>.

Part A

| Conformer           | Bond  | HF                                             |                                    |       | B3LYP                                          |                                    |       |
|---------------------|-------|------------------------------------------------|------------------------------------|-------|------------------------------------------------|------------------------------------|-------|
|                     |       | $^{\text{Comput}} E_{\text{int}}^{\text{A,B}}$ | $\Delta_{\text{int}}^{\text{A,B}}$ | %-err | $^{\text{Comput}} E_{\text{int}}^{\text{A,B}}$ | $\Delta_{\text{int}}^{\text{A,B}}$ | %-err |
| LEC                 | C1–C2 | -64.1                                          | 26.8                               | -41.8 | -117.1                                         | -25.7                              | 22.0  |
| Lin                 | C1–C2 | -62.7                                          | 26.9                               | -43.0 | -115.5                                         | -25.4                              | 22.0  |
| Ecl                 | C1–C2 | -51.2                                          | 29.6                               | -57.8 | -106.2                                         | -25.0                              | 23.6  |
| Average:            |       | -59.3                                          | 27.8                               | -47.5 | -113.0                                         | -25.4                              | 22.5  |
| Standard deviation: |       | 7.1                                            | 1.6                                | 8.9   | 5.9                                            | 0.3                                | 0.9   |

  

| Conformer           | Bond  | B3LYP-GD3                                      |                                    |       | MP2/Müller                                     |                                    |       |
|---------------------|-------|------------------------------------------------|------------------------------------|-------|------------------------------------------------|------------------------------------|-------|
|                     |       | $^{\text{Comput}} E_{\text{int}}^{\text{A,B}}$ | $\Delta_{\text{int}}^{\text{A,B}}$ | %-err | $^{\text{Comput}} E_{\text{int}}^{\text{A,B}}$ | $\Delta_{\text{int}}^{\text{A,B}}$ | %-err |
| LEC                 | C1–C2 | -117.4                                         | -26.0                              | 22.1  | -99.2                                          | -8.0                               | 8.1   |
| Lin                 | C1–C2 | -115.6                                         | -25.5                              | 22.1  | -97.3                                          | -7.5                               | 7.7   |
| Ecl                 | C1–C2 | -106.4                                         | -25.2                              | 23.7  | -87.9                                          | -6.9                               | 7.8   |
| Average:            |       | -113.1                                         | -25.6                              | 22.6  | -94.8                                          | -7.4                               | 7.9   |
| Standard deviation: |       | 5.9                                            | 0.4                                | 0.9   | 6.1                                            | 0.5                                | 0.2   |

Part B

| Conformer           | Bond  | HF                                             |                                    |       | B3LYP                                          |                                    |       |
|---------------------|-------|------------------------------------------------|------------------------------------|-------|------------------------------------------------|------------------------------------|-------|
|                     |       | $^{\text{Comput}} E_{\text{int}}^{\text{A,B}}$ | $\Delta_{\text{int}}^{\text{A,B}}$ | %-err | $^{\text{Comput}} E_{\text{int}}^{\text{A,B}}$ | $\Delta_{\text{int}}^{\text{A,B}}$ | %-err |
| LEC                 | C1–O4 | -471.1                                         | -109.1                             | 23.2  | -352.8                                         | 11.2                               | -3.2  |
|                     | C2–O3 | -492.4                                         | -115.0                             | 23.4  | -368.6                                         | 11.0                               | -3.0  |
| Lin                 | C1–O4 | -481.6                                         | -112.2                             | 23.3  | -361.0                                         | 10.5                               | -2.9  |
|                     | C2–O3 | -481.6                                         | -112.2                             | 23.3  | -361.0                                         | 10.5                               | -2.9  |
| Ecl                 | C1–O4 | -489.8                                         | -118.9                             | 24.3  | -364.6                                         | 8.4                                | -2.3  |
|                     | C2–O3 | -489.7                                         | -118.8                             | 24.3  | -364.6                                         | 8.4                                | -2.3  |
| Average:            |       | -484.4                                         | -114.4                             | 23.6  | -362.1                                         | 10.0                               | -2.8  |
| Standard deviation: |       | 7.9                                            | 4.0                                | 0.5   | 5.3                                            | 1.3                                | 0.4   |

  

| Conformer           | Bond  | B3LYP-GD3                                      |                                    |       | MP2/Müller                                     |                                    |       |
|---------------------|-------|------------------------------------------------|------------------------------------|-------|------------------------------------------------|------------------------------------|-------|
|                     |       | $^{\text{Comput}} E_{\text{int}}^{\text{A,B}}$ | $\Delta_{\text{int}}^{\text{A,B}}$ | %-err | $^{\text{Comput}} E_{\text{int}}^{\text{A,B}}$ | $\Delta_{\text{int}}^{\text{A,B}}$ | %-err |
| LEC                 | C1–O4 | -351.9                                         | 12.1                               | -3.4  | -352.4                                         | 10.7                               | -3.0  |
|                     | C2–O3 | -367.7                                         | 11.8                               | -3.2  | -368.6                                         | 9.9                                | -2.7  |
| Lin                 | C1–O4 | -360.6                                         | 10.9                               | -3.0  | -361.0                                         | 9.6                                | -2.7  |
|                     | C2–O3 | -360.6                                         | 10.9                               | -3.0  | -361.0                                         | 9.6                                | -2.7  |
| Ecl                 | C1–O4 | -363.7                                         | 9.3                                | -2.6  | -362.9                                         | 9.1                                | -2.5  |
|                     | C2–O3 | -363.7                                         | 9.3                                | -2.6  | -363.0                                         | 9.0                                | -2.5  |
| Average:            |       | -361.4                                         | 10.7                               | -3.0  | -361.5                                         | 9.6                                | -2.7  |
| Standard deviation: |       | 5.3                                            | 1.2                                | 0.4   | 5.3                                            | 0.6                                | 0.2   |

## Part C

| Conformer           | Bond   | HF                                   |                                    |       | B3LYP                                |                                    |       |
|---------------------|--------|--------------------------------------|------------------------------------|-------|--------------------------------------|------------------------------------|-------|
|                     |        | Comput $E_{\text{int}}^{\text{A,B}}$ | $\Delta_{\text{int}}^{\text{A,B}}$ | %-err | Comput $E_{\text{int}}^{\text{A,B}}$ | $\Delta_{\text{int}}^{\text{A,B}}$ | %-err |
| LEC                 | C1-H7  | -165.4                               | -28.5                              | 17.2  | -149.5                               | -11.8                              | 7.9   |
|                     | C1-H9  | -168.2                               | -29.7                              | 17.7  | -150.7                               | -11.5                              | 7.6   |
|                     | C2-H8  | -162.8                               | -27.6                              | 16.9  | -147.2                               | -11.2                              | 7.6   |
|                     | C2-H10 | -165.2                               | -28.8                              | 17.4  | -148.4                               | -11.3                              | 7.6   |
| Lin                 | C1-H7  | -166.1                               | -28.8                              | 17.3  | -149.7                               | -11.6                              | 7.8   |
|                     | C1-H9  | -166.1                               | -28.8                              | 17.3  | -149.7                               | -11.6                              | 7.8   |
|                     | C2-H8  | -166.1                               | -28.8                              | 17.3  | -149.7                               | -11.6                              | 7.8   |
|                     | C2-H10 | -166.1                               | -28.8                              | 17.3  | -149.7                               | -11.6                              | 7.8   |
| Ecl                 | C1-H7  | -171.8                               | -30.9                              | 18.0  | -153.0                               | -11.4                              | 7.4   |
|                     | C1-H9  | -171.8                               | -30.9                              | 18.0  | -153.0                               | -11.4                              | 7.4   |
|                     | C2-H8  | -171.8                               | -30.9                              | 18.0  | -153.0                               | -11.4                              | 7.4   |
|                     | C2-H10 | -171.8                               | -30.9                              | 18.0  | -153.0                               | -11.4                              | 7.4   |
| Average:            |        | -167.7                               | -29.4                              | 17.5  | -150.6                               | -11.5                              | 7.6   |
| Standard deviation: |        | 3.2                                  | 1.2                                | 0.4   | 2.0                                  | 0.2                                | 0.2   |

| Conformer           | Bond   | B3LYP-GD3                            |                                    |       | MP2/Müller                           |                                    |       |
|---------------------|--------|--------------------------------------|------------------------------------|-------|--------------------------------------|------------------------------------|-------|
|                     |        | Comput $E_{\text{int}}^{\text{A,B}}$ | $\Delta_{\text{int}}^{\text{A,B}}$ | %-err | Comput $E_{\text{int}}^{\text{A,B}}$ | $\Delta_{\text{int}}^{\text{A,B}}$ | %-err |
| LEC                 | C1-H7  | -149.4                               | -11.7                              | 7.8   | -139.4                               | -2.0                               | 1.4   |
|                     | C1-H9  | -150.7                               | -11.5                              | 7.6   | -140.8                               | -2.0                               | 1.4   |
|                     | C2-H8  | -147.2                               | -11.2                              | 7.6   | -137.2                               | -1.6                               | 1.2   |
|                     | C2-H10 | -148.3                               | -11.2                              | 7.5   | -138.6                               | -1.8                               | 1.3   |
| Lin                 | C1-H7  | -149.6                               | -11.6                              | 7.7   | -139.7                               | -2.0                               | 1.5   |
|                     | C1-H9  | -149.6                               | -11.6                              | 7.7   | -139.7                               | -2.0                               | 1.4   |
|                     | C2-H8  | -149.6                               | -11.6                              | 7.7   | -139.7                               | -2.0                               | 1.5   |
|                     | C2-H10 | -149.6                               | -11.6                              | 7.7   | -139.7                               | -2.0                               | 1.4   |
| Ecl                 | C1-H7  | -153.0                               | -11.3                              | 7.4   | -143.2                               | -2.0                               | 1.4   |
|                     | C1-H9  | -153.0                               | -11.3                              | 7.4   | -143.2                               | -2.0                               | 1.4   |
|                     | C2-H8  | -153.0                               | -11.3                              | 7.4   | -143.2                               | -1.9                               | 1.4   |
|                     | C2-H10 | -153.0                               | -11.3                              | 7.4   | -143.2                               | -1.9                               | 1.4   |
| Average:            |        | -150.5                               | -11.4                              | 7.6   | -140.7                               | -1.9                               | 1.4   |
| Standard deviation: |        | 2.0                                  | 0.2                                | 0.2   | 2.1                                  | 0.1                                | 0.1   |

## Part D

| Conformer           | Bond  | HF                                   |                                    |       | B3LYP                                |                                    |       |
|---------------------|-------|--------------------------------------|------------------------------------|-------|--------------------------------------|------------------------------------|-------|
|                     |       | Comput $E_{\text{int}}^{\text{A,B}}$ | $\Delta_{\text{int}}^{\text{A,B}}$ | %-err | Comput $E_{\text{int}}^{\text{A,B}}$ | $\Delta_{\text{int}}^{\text{A,B}}$ | %-err |
| LEC                 | O3-H6 | -366.7                               | -49.1                              | 13.4  | -322.0                               | -2.4                               | 0.8   |
|                     | O4-H5 | -362.5                               | -47.0                              | 13.0  | -319.7                               | -2.5                               | 0.8   |
| Lin                 | O3-H6 | -361.8                               | -48.4                              | 13.4  | -318.9                               | -3.8                               | 1.2   |
|                     | O4-H5 | -361.8                               | -48.4                              | 13.4  | -318.9                               | -3.8                               | 1.2   |
| Ecl                 | O3-H6 | -358.4                               | -49.4                              | 13.8  | -315.4                               | -4.6                               | 1.5   |
|                     | O4-H5 | -358.4                               | -49.4                              | 13.8  | -315.4                               | -4.6                               | 1.5   |
| Average:            |       | -361.6                               | -48.6                              | 13.5  | -318.4                               | -3.6                               | 1.1   |
| Standard deviation: |       | 3.1                                  | 0.9                                | 0.3   | 2.6                                  | 1.0                                | 0.3   |

| Conformer           | Bond  | B3LYP-GD3                            |                                    |       | MP2/Müller                           |                                    |       |
|---------------------|-------|--------------------------------------|------------------------------------|-------|--------------------------------------|------------------------------------|-------|
|                     |       | Comput $E_{\text{int}}^{\text{A,B}}$ | $\Delta_{\text{int}}^{\text{A,B}}$ | %-err | Comput $E_{\text{int}}^{\text{A,B}}$ | $\Delta_{\text{int}}^{\text{A,B}}$ | %-err |
| LEC                 | O3-H6 | -321.8                               | -2.3                               | 0.7   | -324.9                               | -6.2                               | 1.9   |
|                     | O4-H5 | -319.6                               | -2.3                               | 0.7   | -321.7                               | -5.3                               | 1.7   |
| Lin                 | O3-H6 | -318.9                               | -3.7                               | 1.2   | -320.7                               | -6.4                               | 2.0   |
|                     | O4-H5 | -318.9                               | -3.7                               | 1.2   | -320.7                               | -6.4                               | 2.0   |
| Ecl                 | O3-H6 | -315.2                               | -4.5                               | 1.4   | -316.3                               | -6.4                               | 2.0   |
|                     | O4-H5 | -315.2                               | -4.5                               | 1.4   | -316.3                               | -6.3                               | 2.0   |
| Average:            |       | -318.3                               | -3.5                               | 1.1   | -320.1                               | -6.2                               | 1.9   |
| Standard deviation: |       | 2.6                                  | 1.0                                | 0.3   | 3.3                                  | 0.4                                | 0.1   |

**Table S68.** Combined analysis of relative errors,  $\Delta_{\text{cl}}^{\text{A,B}}$ , in the computed classical term of diatomic interaction energies,  $^{\text{Comput}}V_{\text{cl}}^{\text{A,B}}$ , of covalently bonded atoms for each conformer of glycol at the indicated levels of theory. Data for C–C bonds is shown in Part A; for C–O bonds in Part B; for C–H bonds in Part C; for O–H bonds in Part D. All values are in kcal mol<sup>-1</sup>.

Part A

| Conformer           | Bond  | HF                                           |                                   |       | B3LYP                                        |                                   |       |
|---------------------|-------|----------------------------------------------|-----------------------------------|-------|----------------------------------------------|-----------------------------------|-------|
|                     |       | $^{\text{Comput}}V_{\text{cl}}^{\text{A,B}}$ | $\Delta_{\text{cl}}^{\text{A,B}}$ | %-err | $^{\text{Comput}}V_{\text{cl}}^{\text{A,B}}$ | $\Delta_{\text{cl}}^{\text{A,B}}$ | %-err |
| LEC                 | C1–C2 | 118.5                                        | 40.4                              | 34.1  | 66.2                                         | -12.3                             | -18.6 |
| Lin                 | C1–C2 | 118.5                                        | 40.4                              | 34.1  | 65.9                                         | -12.7                             | -19.2 |
| Ecl                 | C1–C2 | 125.0                                        | 43.6                              | 34.9  | 69.5                                         | -12.3                             | -17.7 |
| Average:            |       | 120.7                                        | 41.5                              | 34.3  | 67.2                                         | -12.5                             | -18.5 |
| Standard deviation: |       | 3.7                                          | 1.8                               | 0.5   | 2.0                                          | 0.2                               | 0.8   |

| Conformer           | Bond  | B3LYP-GD3                                    |                                   |       | MP2/Müller                                   |                                   |       |
|---------------------|-------|----------------------------------------------|-----------------------------------|-------|----------------------------------------------|-----------------------------------|-------|
|                     |       | $^{\text{Comput}}V_{\text{cl}}^{\text{A,B}}$ | $\Delta_{\text{cl}}^{\text{A,B}}$ | %-err | $^{\text{Comput}}V_{\text{cl}}^{\text{A,B}}$ | $\Delta_{\text{cl}}^{\text{A,B}}$ | %-err |
| LEC                 | C1–C2 | 65.9                                         | -12.7                             | -19.3 | 71.8                                         | -6.5                              | -9.1  |
| Lin                 | C1–C2 | 65.8                                         | -12.8                             | -19.5 | 71.9                                         | -6.5                              | -9.1  |
| Ecl                 | C1–C2 | 69.1                                         | -12.8                             | -18.4 | 75.4                                         | -6.3                              | -8.3  |
| Average:            |       | 66.9                                         | -12.7                             | -19.1 | 73.0                                         | -6.4                              | -8.8  |
| Standard deviation: |       | 1.9                                          | 0.1                               | 0.5   | 2.0                                          | 0.2                               | 0.4   |

Part B

| Conformer           | Bond  | HF                                           |                                   |       | B3LYP                                        |                                   |       |
|---------------------|-------|----------------------------------------------|-----------------------------------|-------|----------------------------------------------|-----------------------------------|-------|
|                     |       | $^{\text{Comput}}V_{\text{cl}}^{\text{A,B}}$ | $\Delta_{\text{cl}}^{\text{A,B}}$ | %-err | $^{\text{Comput}}V_{\text{cl}}^{\text{A,B}}$ | $\Delta_{\text{cl}}^{\text{A,B}}$ | %-err |
| LEC                 | C1–O4 | -319.3                                       | -110.4                            | 34.6  | -188.2                                       | 21.9                              | -11.7 |
|                     | C2–O3 | -337.6                                       | -117.1                            | 34.7  | -199.8                                       | 21.9                              | -11.0 |
| Lin                 | C1–O4 | -328.6                                       | -113.5                            | 34.5  | -194.5                                       | 21.8                              | -11.2 |
|                     | C2–O3 | -328.6                                       | -113.5                            | 34.5  | -194.5                                       | 21.8                              | -11.2 |
| Ecl                 | C1–O4 | -333.7                                       | -119.8                            | 35.9  | -194.7                                       | 20.4                              | -10.5 |
|                     | C2–O3 | -333.5                                       | -119.7                            | 35.9  | -194.6                                       | 20.5                              | -10.5 |
| Average:            |       | -330.2                                       | -115.7                            | 35.0  | -194.4                                       | 21.4                              | -11.0 |
| Standard deviation: |       | 6.4                                          | 3.8                               | 0.7   | 3.7                                          | 0.8                               | 0.5   |

| Conformer           | Bond  | B3LYP-GD3                                    |                                   |       | MP2/Müller                                   |                                   |       |
|---------------------|-------|----------------------------------------------|-----------------------------------|-------|----------------------------------------------|-----------------------------------|-------|
|                     |       | $^{\text{Comput}}V_{\text{cl}}^{\text{A,B}}$ | $\Delta_{\text{cl}}^{\text{A,B}}$ | %-err | $^{\text{Comput}}V_{\text{cl}}^{\text{A,B}}$ | $\Delta_{\text{cl}}^{\text{A,B}}$ | %-err |
| LEC                 | C1–O4 | -187.3                                       | 22.8                              | -12.2 | -196.8                                       | 12.7                              | -6.5  |
|                     | C2–O3 | -199.1                                       | 22.7                              | -11.4 | -209.2                                       | 12.0                              | -5.7  |
| Lin                 | C1–O4 | -194.1                                       | 22.2                              | -11.5 | -203.6                                       | 12.2                              | -6.0  |
|                     | C2–O3 | -194.1                                       | 22.2                              | -11.5 | -203.6                                       | 12.2                              | -6.0  |
| Ecl                 | C1–O4 | -193.9                                       | 21.2                              | -10.9 | -202.8                                       | 11.7                              | -5.8  |
|                     | C2–O3 | -193.8                                       | 21.3                              | -11.0 | -202.8                                       | 11.7                              | -5.8  |
| Average:            |       | -193.7                                       | 22.1                              | -11.4 | -203.1                                       | 12.1                              | -5.9  |
| Standard deviation: |       | 3.7                                          | 0.7                               | 0.4   | 3.9                                          | 0.4                               | 0.3   |

## Part C

| Conformer           | Bond   | HF                    |                     |        | B3LYP                 |                     |       |
|---------------------|--------|-----------------------|---------------------|--------|-----------------------|---------------------|-------|
|                     |        | Comput $V_{cl}^{A,B}$ | $\Delta_{cl}^{A,B}$ | %-err  | Comput $V_{cl}^{A,B}$ | $\Delta_{cl}^{A,B}$ | %-err |
| LEC                 | C1-H7  | 9.6                   | -10.0               | -104.3 | 22.3                  | 2.6                 | 11.6  |
|                     | C1-H9  | 7.0                   | -11.4               | -163.8 | 21.1                  | 2.7                 | 12.6  |
|                     | C2-H8  | 12.2                  | -9.6                | -78.3  | 24.7                  | 2.8                 | 11.3  |
|                     | C2-H10 | 9.1                   | -10.4               | -114.5 | 22.3                  | 2.8                 | 12.4  |
| Lin                 | C1-H7  | 8.9                   | -10.3               | -115.2 | 22.1                  | 2.8                 | 12.5  |
|                     | C1-H9  | 8.9                   | -10.3               | -115.1 | 22.1                  | 2.8                 | 12.5  |
|                     | C2-H8  | 8.9                   | -10.3               | -115.2 | 22.1                  | 2.8                 | 12.5  |
|                     | C2-H10 | 8.9                   | -10.3               | -115.1 | 22.1                  | 2.8                 | 12.5  |
| Ecl                 | C1-H7  | 3.3                   | -12.7               | -383.6 | 19.4                  | 3.3                 | 17.0  |
|                     | C1-H9  | 3.3                   | -12.7               | -383.9 | 19.4                  | 3.3                 | 17.0  |
|                     | C2-H8  | 3.3                   | -12.7               | -382.3 | 19.3                  | 3.3                 | 17.0  |
|                     | C2-H10 | 3.3                   | -12.7               | -382.6 | 19.3                  | 3.3                 | 17.0  |
| Average:            |        | 7.2                   | -11.1               | -204.5 | 21.3                  | 2.9                 | 13.8  |
| Standard deviation: |        | 3.1                   | 1.2                 | 133.2  | 1.7                   | 0.3                 | 2.4   |

| Conformer           | Bond   | B3LYP-GD3             |                     |       | MP2/Müller            |                     |       |
|---------------------|--------|-----------------------|---------------------|-------|-----------------------|---------------------|-------|
|                     |        | Comput $V_{cl}^{A,B}$ | $\Delta_{cl}^{A,B}$ | %-err | Comput $V_{cl}^{A,B}$ | $\Delta_{cl}^{A,B}$ | %-err |
| LEC                 | C1-H7  | 22.4                  | 2.6                 | 11.7  | 22.4                  | 2.7                 | 12.2  |
|                     | C1-H9  | 21.1                  | 2.7                 | 12.7  | 21.1                  | 2.7                 | 12.9  |
|                     | C2-H8  | 24.7                  | 2.8                 | 11.3  | 24.7                  | 2.8                 | 11.3  |
|                     | C2-H10 | 22.4                  | 2.8                 | 12.6  | 22.3                  | 2.8                 | 12.4  |
| Lin                 | C1-H7  | 22.1                  | 2.7                 | 12.5  | 22.0                  | 2.8                 | 12.5  |
|                     | C1-H9  | 22.1                  | 2.7                 | 12.5  | 22.0                  | 2.8                 | 12.5  |
|                     | C2-H8  | 22.1                  | 2.7                 | 12.5  | 22.0                  | 2.8                 | 12.5  |
|                     | C2-H10 | 22.1                  | 2.7                 | 12.5  | 22.0                  | 2.8                 | 12.5  |
| Ecl                 | C1-H7  | 19.4                  | 3.3                 | 17.0  | 19.0                  | 3.0                 | 15.9  |
|                     | C1-H9  | 19.4                  | 3.3                 | 17.0  | 19.0                  | 3.0                 | 15.9  |
|                     | C2-H8  | 19.4                  | 3.3                 | 17.0  | 19.0                  | 3.0                 | 15.9  |
|                     | C2-H10 | 19.4                  | 3.3                 | 17.0  | 19.0                  | 3.0                 | 15.9  |
| Average:            |        | 21.4                  | 2.9                 | 13.8  | 21.2                  | 2.8                 | 13.5  |
| Standard deviation: |        | 1.7                   | 0.3                 | 2.4   | 1.8                   | 0.1                 | 1.8   |

## Part D

| Conformer           | Bond  | HF                    |                     |       | B3LYP                 |                     |       |
|---------------------|-------|-----------------------|---------------------|-------|-----------------------|---------------------|-------|
|                     |       | Comput $V_{cl}^{A,B}$ | $\Delta_{cl}^{A,B}$ | %-err | Comput $V_{cl}^{A,B}$ | $\Delta_{cl}^{A,B}$ | %-err |
| LEC                 | O3-H6 | -250.2                | -46.3               | 18.5  | -200.1                | 4.9                 | -2.5  |
|                     | O4-H5 | -242.4                | -45.0               | 18.5  | -194.1                | 4.4                 | -2.3  |
| Lin                 | O3-H6 | -241.1                | -45.4               | 18.8  | -192.7                | 4.1                 | -2.1  |
|                     | O4-H5 | -241.1                | -45.4               | 18.8  | -192.7                | 4.1                 | -2.1  |
| Ecl                 | O3-H6 | -236.6                | -46.2               | 19.5  | -188.2                | 3.3                 | -1.8  |
|                     | O4-H5 | -236.6                | -46.2               | 19.5  | -188.2                | 3.3                 | -1.8  |
| Average:            |       | -241.3                | -45.7               | 19.0  | -192.7                | 4.0                 | -2.1  |
| Standard deviation: |       | 5.0                   | 0.5                 | 0.4   | 4.4                   | 0.6                 | 0.3   |

| Conformer           | Bond  | B3LYP-GD3             |                     |       | MP2/Müller            |                     |       |
|---------------------|-------|-----------------------|---------------------|-------|-----------------------|---------------------|-------|
|                     |       | Comput $V_{cl}^{A,B}$ | $\Delta_{cl}^{A,B}$ | %-err | Comput $V_{cl}^{A,B}$ | $\Delta_{cl}^{A,B}$ | %-err |
| LEC                 | O3-H6 | -199.9                | 5.1                 | -2.6  | -210.7                | -6.2                | 3.0   |
|                     | O4-H5 | -193.9                | 4.6                 | -2.4  | -203.9                | -5.9                | 2.9   |
| Lin                 | O3-H6 | -192.6                | 4.2                 | -2.2  | -202.2                | -6.0                | 3.0   |
|                     | O4-H5 | -192.6                | 4.2                 | -2.2  | -202.2                | -6.0                | 3.0   |
| Ecl                 | O3-H6 | -188.1                | 3.5                 | -1.8  | -196.8                | -5.8                | 2.9   |
|                     | O4-H5 | -188.1                | 3.5                 | -1.8  | -196.8                | -5.8                | 2.9   |
| Average:            |       | -192.5                | 4.2                 | -2.2  | -202.1                | -5.9                | 2.9   |
| Standard deviation: |       | 4.4                   | 0.6                 | 0.3   | 5.2                   | 0.2                 | 0.0   |



**Table S69.** Combined analysis of relative errors,  $\Delta_{XC}^{A,B}$ , in the computed XC-term,  $^{Comput}V_{XC}^{A,B}$ , of the diatomic interaction energies of covalently bonded atoms for each conformer of glycol at the indicated levels of theory. Data for C–C bonds is shown in Part A; for C–O bonds in Part B; for C–H bonds in Part C; and for O–H bonds in Part D. All values are in kcal mol<sup>-1</sup>.

Part A

| Conformer           | Bond  | HF                      |                     |       | B3LYP                   |                     |       |
|---------------------|-------|-------------------------|---------------------|-------|-------------------------|---------------------|-------|
|                     |       | $^{Comput}V_{XC}^{A,B}$ | $\Delta_{XC}^{A,B}$ | %-err | $^{Comput}V_{XC}^{A,B}$ | $\Delta_{XC}^{A,B}$ | %-err |
| LEC                 | C1–C2 | -182.6                  | -13.6               | 7.5   | -183.3                  | -13.4               | 7.3   |
| Lin                 | C1–C2 | -181.2                  | -13.5               | 7.4   | -181.5                  | -12.8               | 7.0   |
| Ecl                 | C1–C2 | -176.1                  | -14.0               | 8.0   | -175.8                  | -12.7               | 7.2   |
| Average:            |       | -180.0                  | -13.7               | 7.6   | -180.2                  | -12.9               | 7.2   |
| Standard deviation: |       | 3.4                     | 0.3                 | 0.3   | 3.9                     | 0.4                 | 0.1   |

| Conformer           | Bond  | B3LYP-GD3               |                     |       | MP2/Müller              |                     |       |
|---------------------|-------|-------------------------|---------------------|-------|-------------------------|---------------------|-------|
|                     |       | $^{Comput}V_{XC}^{A,B}$ | $\Delta_{XC}^{A,B}$ | %-err | $^{Comput}V_{XC}^{A,B}$ | $\Delta_{XC}^{A,B}$ | %-err |
| LEC                 | C1–C2 | -183.3                  | -13.3               | 7.2   | -171.0                  | -1.5                | 0.9   |
| Lin                 | C1–C2 | -181.4                  | -12.7               | 7.0   | -169.2                  | -0.9                | 0.5   |
| Ecl                 | C1–C2 | -175.5                  | -12.5               | 7.1   | -163.3                  | -0.6                | 0.4   |
| Average:            |       | -180.1                  | -12.8               | 7.1   | -167.8                  | -1.0                | 0.6   |
| Standard deviation: |       | 4.0                     | 0.4                 | 0.1   | 4.0                     | 0.4                 | 0.2   |

Part B

| Conformer           | Bond  | HF                      |                     |       | B3LYP                   |                     |       |
|---------------------|-------|-------------------------|---------------------|-------|-------------------------|---------------------|-------|
|                     |       | $^{Comput}V_{XC}^{A,B}$ | $\Delta_{XC}^{A,B}$ | %-err | $^{Comput}V_{XC}^{A,B}$ | $\Delta_{XC}^{A,B}$ | %-err |
| LEC                 | C1–O4 | -151.8                  | 1.3                 | -0.8  | -164.7                  | -10.7               | 6.5   |
|                     | C2–O3 | -154.8                  | 2.0                 | -1.3  | -168.7                  | -11.0               | 6.5   |
| Lin                 | C1–O4 | -153.0                  | 1.3                 | -0.9  | -166.5                  | -11.3               | 6.8   |
|                     | C2–O3 | -153.0                  | 1.3                 | -0.9  | -166.5                  | -11.3               | 6.8   |
| Ecl                 | C1–O4 | -156.1                  | 0.9                 | -0.6  | -169.9                  | -12.0               | 7.0   |
|                     | C2–O3 | -156.2                  | 0.8                 | -0.5  | -169.9                  | -12.0               | 7.1   |
| Average:            |       | -154.2                  | 1.3                 | -0.8  | -167.7                  | -11.4               | 6.8   |
| Standard deviation: |       | 1.8                     | 0.4                 | 0.3   | 2.1                     | 0.5                 | 0.2   |

| Conformer           | Bond  | B3LYP-GD3               |                     |       | MP2/Müller              |                     |       |
|---------------------|-------|-------------------------|---------------------|-------|-------------------------|---------------------|-------|
|                     |       | $^{Comput}V_{XC}^{A,B}$ | $\Delta_{XC}^{A,B}$ | %-err | $^{Comput}V_{XC}^{A,B}$ | $\Delta_{XC}^{A,B}$ | %-err |
| LEC                 | C1–O4 | -164.6                  | -10.6               | 6.5   | -155.6                  | -2.0                | 1.3   |
|                     | C2–O3 | -168.6                  | -10.9               | 6.4   | -159.4                  | -2.1                | 1.3   |
| Lin                 | C1–O4 | -166.5                  | -11.3               | 6.8   | -157.4                  | -2.6                | 1.7   |
|                     | C2–O3 | -166.5                  | -11.3               | 6.8   | -157.4                  | -2.6                | 1.7   |
| Ecl                 | C1–O4 | -169.8                  | -11.9               | 7.0   | -160.1                  | -2.6                | 1.6   |
|                     | C2–O3 | -169.9                  | -12.0               | 7.0   | -160.1                  | -2.7                | 1.7   |
| Average:            |       | -167.7                  | -11.3               | 6.8   | -158.3                  | -2.4                | 1.5   |
| Standard deviation: |       | 2.1                     | 0.5                 | 0.3   | 1.8                     | 0.3                 | 0.2   |

## Part C

| Conformer           | Bond   | HF                    |                     |       | B3LYP                 |                     |       |
|---------------------|--------|-----------------------|---------------------|-------|-----------------------|---------------------|-------|
|                     |        | Comput $V_{XC}^{A,B}$ | $\Delta_{XC}^{A,B}$ | %-err | Comput $V_{XC}^{A,B}$ | $\Delta_{XC}^{A,B}$ | %-err |
| LEC                 | C1-H7  | -175.0                | -18.5               | 10.5  | -171.8                | -14.4               | 8.4   |
|                     | C1-H9  | -175.1                | -18.3               | 10.5  | -171.9                | -14.2               | 8.3   |
|                     | C2-H8  | -175.0                | -18.0               | 10.3  | -171.9                | -14.0               | 8.2   |
|                     | C2-H10 | -174.2                | -18.4               | 10.6  | -170.8                | -14.0               | 8.2   |
| Lin                 | C1-H7  | -175.0                | -18.5               | 10.6  | -171.8                | -14.4               | 8.4   |
|                     | C1-H9  | -175.0                | -18.5               | 10.6  | -171.7                | -14.4               | 8.4   |
|                     | C2-H8  | -175.0                | -18.5               | 10.6  | -171.8                | -14.4               | 8.4   |
|                     | C2-H10 | -175.0                | -18.5               | 10.6  | -171.7                | -14.4               | 8.4   |
| Ecl                 | C1-H7  | -175.1                | -18.2               | 10.4  | -172.4                | -14.7               | 8.5   |
|                     | C1-H9  | -175.1                | -18.2               | 10.4  | -172.4                | -14.7               | 8.5   |
|                     | C2-H8  | -175.1                | -18.3               | 10.4  | -172.4                | -14.7               | 8.5   |
|                     | C2-H10 | -175.1                | -18.2               | 10.4  | -172.4                | -14.7               | 8.5   |
| Average:            |        | -175.0                | -18.4               | 10.5  | -171.9                | -14.4               | 8.4   |
| Standard deviation: |        | 0.2                   | 0.2                 | 0.1   | 0.5                   | 0.2                 | 0.1   |

| Conformer           | Bond   | B3LYP-GD3             |                     |       | MP2/Müller            |                     |       |
|---------------------|--------|-----------------------|---------------------|-------|-----------------------|---------------------|-------|
|                     |        | Comput $V_{XC}^{A,B}$ | $\Delta_{XC}^{A,B}$ | %-err | Comput $V_{XC}^{A,B}$ | $\Delta_{XC}^{A,B}$ | %-err |
| LEC                 | C1-H7  | -171.8                | -14.3               | 8.3   | -161.8                | -4.8                | 2.9   |
|                     | C1-H9  | -171.8                | -14.2               | 8.2   | -161.9                | -4.7                | 2.9   |
|                     | C2-H8  | -171.9                | -14.0               | 8.2   | -161.9                | -4.4                | 2.7   |
|                     | C2-H10 | -170.7                | -14.0               | 8.2   | -160.8                | -4.5                | 2.8   |
| Lin                 | C1-H7  | -171.7                | -14.3               | 8.3   | -161.7                | -4.8                | 3.0   |
|                     | C1-H9  | -171.7                | -14.3               | 8.3   | -161.7                | -4.8                | 3.0   |
|                     | C2-H8  | -171.7                | -14.3               | 8.3   | -161.7                | -4.8                | 3.0   |
|                     | C2-H10 | -171.7                | -14.3               | 8.3   | -161.7                | -4.8                | 3.0   |
| Ecl                 | C1-H7  | -172.3                | -14.6               | 8.5   | -162.3                | -5.0                | 3.1   |
|                     | C1-H9  | -172.3                | -14.6               | 8.5   | -162.3                | -5.0                | 3.1   |
|                     | C2-H8  | -172.3                | -14.6               | 8.5   | -162.3                | -5.0                | 3.1   |
|                     | C2-H10 | -172.3                | -14.6               | 8.5   | -162.3                | -5.0                | 3.1   |
| Average:            |        | -171.9                | -14.3               | 8.3   | -161.9                | -4.8                | 3.0   |
| Standard deviation: |        | 0.5                   | 0.2                 | 0.1   | 0.4                   | 0.2                 | 0.1   |

## Part D

| Conformer           | Bond  | HF                    |                     |       | B3LYP                 |                     |       |
|---------------------|-------|-----------------------|---------------------|-------|-----------------------|---------------------|-------|
|                     |       | Comput $V_{XC}^{A,B}$ | $\Delta_{XC}^{A,B}$ | %-err | Comput $V_{XC}^{A,B}$ | $\Delta_{XC}^{A,B}$ | %-err |
| LEC                 | O3-H6 | -116.6                | -2.8                | 2.4   | -121.8                | -7.3                | 6.0   |
|                     | O4-H5 | -120.1                | -2.1                | 1.7   | -125.6                | -6.9                | 5.5   |
| Lin                 | O3-H6 | -120.7                | -3.0                | 2.5   | -126.3                | -7.9                | 6.3   |
|                     | O4-H5 | -120.7                | -3.0                | 2.5   | -126.3                | -7.9                | 6.3   |
| Ecl                 | O3-H6 | -121.8                | -3.3                | 2.7   | -127.2                | -7.9                | 6.2   |
|                     | O4-H5 | -121.8                | -3.3                | 2.7   | -127.2                | -7.9                | 6.2   |
| Average:            |       | -120.3                | -2.9                | 2.4   | -125.7                | -7.7                | 6.1   |
| Standard deviation: |       | 1.9                   | 0.4                 | 0.3   | 2.0                   | 0.4                 | 0.3   |

| Conformer           | Bond  | B3LYP-GD3             |                     |       | MP2/Müller            |                     |       |
|---------------------|-------|-----------------------|---------------------|-------|-----------------------|---------------------|-------|
|                     |       | Comput $V_{XC}^{A,B}$ | $\Delta_{XC}^{A,B}$ | %-err | Comput $V_{XC}^{A,B}$ | $\Delta_{XC}^{A,B}$ | %-err |
| LEC                 | O3-H6 | -121.9                | -7.4                | 6.1   | -114.2                | 0.0                 | 0.0   |
|                     | O4-H5 | -125.6                | -6.9                | 5.5   | -117.8                | 0.5                 | -0.5  |
| Lin                 | O3-H6 | -126.3                | -7.9                | 6.3   | -118.5                | -0.5                | 0.4   |
|                     | O4-H5 | -126.3                | -7.9                | 6.3   | -118.5                | -0.5                | 0.4   |
| Ecl                 | O3-H6 | -127.1                | -7.9                | 6.2   | -119.5                | -0.6                | 0.5   |
|                     | O4-H5 | -127.1                | -7.9                | 6.2   | -119.5                | -0.6                | 0.5   |
| Average:            |       | -125.7                | -7.7                | 6.1   | -118.0                | -0.3                | 0.2   |
| Standard deviation: |       | 2.0                   | 0.4                 | 0.3   | 2.0                   | 0.4                 | 0.4   |

**Table S70.** Comparative analysis of computed/expected (for all conformers) interaction energy (part a) and its components (a classical term in part b and an XC-term in part c) for the O4...H6 and O3...O4 intramolecular interactions at the indicated levels of theory. Energies are in kcal mol<sup>-1</sup>.

| <b>Part a</b>    | <b>CCSD/BBC1</b> | <b>HF</b>    | <b>B3LYP</b>                                      | <b>B3LYP-GD3</b> | <b>MP2/Müller</b> |
|------------------|------------------|--------------|---------------------------------------------------|------------------|-------------------|
| <b>Conformer</b> | Computed         |              | Computed/Expected $E_{\text{int}}^{\text{O4,H6}}$ |                  |                   |
| Lin              | -50.4            | -60.6/-50.2  | -48.4/-50.5                                       | -48.4/-50.5      | -50.8/-50.4       |
| LEC              | -90.9            | -103.9/-90.6 | -86.1/-91.1                                       | -85.8/-91.1      | -93.0/-90.9       |
| Ecl              | -59.4            | -71.3/-59.2  | -57.2/-59.6                                       | -57.2/-59.6      | -60.0/-59.4       |
|                  | Averaged error   | -11.9±1.5    | 3.2±1.6                                           | 3.3±1.8          | -1.0±0.9          |
|                  | Averaged %-error | 17.8         | -4.8                                              | -4.9             | 1.5               |
| <b>Conformer</b> | Computed         |              | Computed/Expected $E_{\text{int}}^{\text{O3,O4}}$ |                  |                   |
| Lin              | 103.2            | 140.1/102.8  | 102.4/103.4                                       | 102.4/103.4      | 107.8/103.2       |
| LEC              | 137.1            | 181.0/136.6  | 133.9/137.4                                       | 133.6/137.4      | 142.3/137.1       |
| Ecl              | 121.2            | 168.1/120.8  | 121.4/121.5                                       | 121.2/121.5      | 126.8/121.2       |
|                  | Averaged error   | 43.0±5.2     | -1.5±1.8                                          | -1.7±1.9         | 5.2±0.5           |
|                  | Averaged %-error | 35.7         | -1.3                                              | -1.4             | 4.3               |
| <b>Part b</b>    | <b>CCSD/BBC1</b> | <b>HF</b>    | <b>B3LYP</b>                                      | <b>B3LYP-GD3</b> | <b>MP2/Müller</b> |
| <b>Conformer</b> | Computed         |              | Computed/Expected $V_{\text{cl}}^{\text{O4,H6}}$  |                  |                   |
| Lin              | -49.9            | -60.5/-49.7  | -48.3/-50.0                                       | -48.3/-50.0      | -50.7/-49.9       |
| LEC              | -87.9            | -102.6/-87.6 | -83.8/-88.1                                       | -83.5/-88.1      | -90.2/-87.8       |
| Ecl              | -58.8            | -71.2/-58.6  | -57.1/-58.9                                       | -57.0/-58.9      | -59.9/-58.8       |
|                  | Averaged error   | -12.8±2.1    | 2.6±1.4                                           | 2.7±1.6          | -1.4±0.8          |
|                  | Averaged %-error | 19.6         | -4.0                                              | -4.1             | 2.2               |
| <b>Conformer</b> | Computed         |              | Computed/Expected $V_{\text{cl}}^{\text{O3,O4}}$  |                  |                   |
| Lin              | 108.9            | 140.9/108.6  | 103.4/109.2                                       | 103.4/109.2      | 108.5/108.9       |
| LEC              | 146.3            | 184.9/145.8  | 138.2/146.6                                       | 137.9/146.6      | 146.8/146.2       |
| Ecl              | 136.4            | 175.4/136.0  | 129.9/136.8                                       | 129.7/136.8      | 136.0/136.4       |
|                  | Averaged error   | 37.0±4.0     | -7.0±1.3                                          | -7.2±1.5         | -0.1±0.6          |
|                  | Averaged %-error | 28.3         | -5.4                                              | -5.5             | -0.1              |
| <b>Part c</b>    | <b>CCSD/BBC1</b> | <b>HF</b>    | <b>B3LYP</b>                                      | <b>B3LYP-GD3</b> | <b>MP2/Müller</b> |
| <b>Conformer</b> | Computed         |              | Computed/Expected $V_{\text{XC}}^{\text{O4,H6}}$  |                  |                   |
| Lin              | -0.50            | -0.05/-0.50  | -0.07/-0.50                                       | -0.07/-0.50      | -0.05/-0.50       |
| LEC              | -3.03            | -1.26/-3.02  | -2.26/-3.04                                       | -2.22/-3.04      | -2.75/-3.03       |
| Ecl              | -0.67            | -0.11/-0.66  | -0.15/-0.67                                       | -0.15/-0.67      | -0.14/-0.67       |
|                  | Averaged error   | 0.92±0.72    | 0.58±0.18                                         | 0.59±0.20        | 0.42±0.13         |
|                  | Averaged %-error | -65.9        | -41.3                                             | -42.4            | -30.1             |
| <b>Conformer</b> | Computed         |              | Computed/Expected $V_{\text{XC}}^{\text{O3,O4}}$  |                  |                   |
| Lin              | -5.8             | -0.8/-5.7    | -1.0/-5.8                                         | -1.0/-5.8        | -0.7/-5.8         |
| LEC              | -9.2             | -3.8/-9.1    | -4.3/-9.2                                         | -4.3/-9.2        | -4.6/-9.2         |
| Ecl              | -15.3            | -7.3/-15.2   | -8.4/-15.3                                        | -8.4/-15.3       | -9.2/-15.3        |
|                  | Averaged error   | 6.1±1.6      | 5.5±1.2                                           | 5.5±1.2          | 5.2±0.8           |
|                  | Averaged %-error | -60.1        | -54.8                                             | -54.9            | -52.1             |

**Table S71.** Using the CCSD/BBC1 data as a reference, analysis of relative errors  $\Delta_{\text{int}}^{\text{A,B}}$  in interaction energies  $E_{\text{int}}^{\text{A,B}}$  computed at HF for distant C,H atom-pairs in all conformers of glycol (values in kcal mol<sup>-1</sup>).

| C...H in LEC                                                  |        | CCSD/BBC1                     |                                   | HF                                   |                                      |                                    |
|---------------------------------------------------------------|--------|-------------------------------|-----------------------------------|--------------------------------------|--------------------------------------|------------------------------------|
| Atom A                                                        | Atom B | $E_{\text{int}}^{\text{A,B}}$ | $E_{\text{int}}^{\text{A,B}} / E$ | Comput $E_{\text{int}}^{\text{A,B}}$ | Expect $E_{\text{int}}^{\text{A,B}}$ | $\Delta_{\text{int}}^{\text{A,B}}$ |
| C1                                                            | H5     | 78.29                         | -5.43115E-04                      | 105.18                               | 78.04                                | 27.14                              |
| C1                                                            | H6     | 47.76                         | -3.31314E-04                      | 64.01                                | 47.61                                | 16.40                              |
| C1                                                            | H8     | -3.92                         | 2.72198E-05                       | -8.73                                | -3.91                                | -4.82                              |
| C1                                                            | H10    | -5.06                         | 3.50861E-05                       | -10.64                               | -5.04                                | -5.59                              |
| C2                                                            | H5     | 38.67                         | -2.68255E-04                      | 52.84                                | 38.54                                | 14.30                              |
| C2                                                            | H6     | 85.16                         | -5.90764E-04                      | 113.38                               | 84.88                                | 28.49                              |
| C2                                                            | H7     | -4.58                         | 3.17769E-05                       | -10.39                               | -4.57                                | -5.82                              |
| C2                                                            | H9     | -5.06                         | 3.51173E-05                       | -11.38                               | -5.05                                | -6.34                              |
| Average for $ \Delta_{\text{int}}^{\text{A,B}} $ :            |        |                               |                                   |                                      |                                      | 13.6                               |
| Standard deviation for $ \Delta_{\text{int}}^{\text{A,B}} $ : |        |                               |                                   |                                      |                                      | 9.8                                |

  

| C...H in Linear                                               |        | CCSD/BBC1                     |                                   | HF                                   |                                      |                                    |
|---------------------------------------------------------------|--------|-------------------------------|-----------------------------------|--------------------------------------|--------------------------------------|------------------------------------|
| Atom A                                                        | Atom B | $E_{\text{int}}^{\text{A,B}}$ | $E_{\text{int}}^{\text{A,B}} / E$ | Comput $E_{\text{int}}^{\text{A,B}}$ | Expect $E_{\text{int}}^{\text{A,B}}$ | $\Delta_{\text{int}}^{\text{A,B}}$ |
| C1                                                            | H5     | 80.84                         | -5.60847E-04                      | 108.39                               | 80.58                                | 27.80                              |
| C1                                                            | H6     | 34.65                         | -2.40395E-04                      | 47.95                                | 34.54                                | 13.41                              |
| C1                                                            | H8     | -4.93                         | 3.41684E-05                       | -10.56                               | -4.91                                | -5.65                              |
| C1                                                            | H10    | -4.93                         | 3.41684E-05                       | -10.56                               | -4.91                                | -5.65                              |
| C2                                                            | H5     | 34.65                         | -2.40395E-04                      | 47.95                                | 34.54                                | 13.41                              |
| C2                                                            | H6     | 80.84                         | -5.60847E-04                      | 108.39                               | 80.58                                | 27.80                              |
| C2                                                            | H7     | -4.93                         | 3.41684E-05                       | -10.56                               | -4.91                                | -5.65                              |
| C2                                                            | H9     | -4.93                         | 3.41684E-05                       | -10.56                               | -4.91                                | -5.65                              |
| Average for $ \Delta_{\text{int}}^{\text{A,B}} $ :            |        |                               |                                   |                                      |                                      | 13.1                               |
| Standard deviation for $ \Delta_{\text{int}}^{\text{A,B}} $ : |        |                               |                                   |                                      |                                      | 9.7                                |

  

| C...H in Eclipsed                                             |        | CCSD/BBC1                     |                                   | HF                                   |                                      |                                    |
|---------------------------------------------------------------|--------|-------------------------------|-----------------------------------|--------------------------------------|--------------------------------------|------------------------------------|
| Atom A                                                        | Atom B | $E_{\text{int}}^{\text{A,B}}$ | $E_{\text{int}}^{\text{A,B}} / E$ | Comput $E_{\text{int}}^{\text{A,B}}$ | Expect $E_{\text{int}}^{\text{A,B}}$ | $\Delta_{\text{int}}^{\text{A,B}}$ |
| C1                                                            | H5     | 82.40                         | -5.71696E-04                      | 111.63                               | 82.14                                | 29.49                              |
| C1                                                            | H6     | 37.71                         | -2.61656E-04                      | 51.89                                | 37.59                                | 14.30                              |
| C1                                                            | H8     | -6.60                         | 4.58093E-05                       | -12.88                               | -6.58                                | -6.30                              |
| C1                                                            | H10    | -6.60                         | 4.58093E-05                       | -12.88                               | -6.58                                | -6.29                              |
| C2                                                            | H5     | 37.71                         | -2.61656E-04                      | 51.84                                | 37.59                                | 14.24                              |
| C2                                                            | H6     | 82.40                         | -5.71696E-04                      | 111.57                               | 82.14                                | 29.43                              |
| C2                                                            | H7     | -6.60                         | 4.58093E-05                       | -12.87                               | -6.58                                | -6.29                              |
| C2                                                            | H9     | -6.60                         | 4.58093E-05                       | -12.87                               | -6.58                                | -6.29                              |
| Average for $ \Delta_{\text{int}}^{\text{A,B}} $ :            |        |                               |                                   |                                      |                                      | 14.1                               |
| Standard deviation for $ \Delta_{\text{int}}^{\text{A,B}} $ : |        |                               |                                   |                                      |                                      | 10.1                               |

**Table S72.** Using the CCSD/BBC1 data as a reference, analysis of relative errors  $\Delta_{cl}^{A,B}$  in classical term  $V_{cl}^{A,B}$  of interaction energies computed at HF for distant C,H atom-pairs in all conformers of glycol (values in kcal mol<sup>-1</sup>).

| C...H in LEC                                   |        | CCSD/BBC1      |                    | HF                    |                       |                     |
|------------------------------------------------|--------|----------------|--------------------|-----------------------|-----------------------|---------------------|
| Atom A                                         | Atom B | $V_{cl}^{A,B}$ | $V_{cl}^{A,B} / E$ | Comput $V_{cl}^{A,B}$ | Expect $V_{cl}^{A,B}$ | $\Delta_{cl}^{A,B}$ |
| C1                                             | H5     | 79.50          | -5.51515E-04       | 106.02                | 79.24                 | 26.77               |
| C1                                             | H6     | 48.29          | -3.35024E-04       | 64.12                 | 48.14                 | 15.99               |
| C1                                             | H8     | 0.12           | -8.38500E-07       | -4.55                 | 0.12                  | -4.67               |
| C1                                             | H10    | -1.10          | 7.61256E-06        | -6.66                 | -1.09                 | -5.57               |
| C2                                             | H5     | 39.11          | -2.71330E-04       | 53.14                 | 38.99                 | 14.15               |
| C2                                             | H6     | 86.47          | -5.99872E-04       | 114.17                | 86.19                 | 27.98               |
| C2                                             | H7     | -0.83          | 5.78789E-06        | -6.85                 | -0.83                 | -6.02               |
| C2                                             | H9     | -1.27          | 8.79525E-06        | -7.48                 | -1.26                 | -6.21               |
| Average for $ \Delta_{cl}^{A,B} $ :            |        |                |                    |                       |                       | 13.4                |
| Standard deviation for $ \Delta_{cl}^{A,B} $ : |        |                |                    |                       |                       | 9.6                 |
| C...H in Linear                                |        | CCSD/BBC1      |                    | HF                    |                       |                     |
| Atom A                                         | Atom B | $V_{cl}^{A,B}$ | $V_{cl}^{A,B} / E$ | Comput $V_{cl}^{A,B}$ | Expect $V_{cl}^{A,B}$ | $\Delta_{cl}^{A,B}$ |
| C1                                             | H5     | 82.17          | -5.70019E-04       | 109.23                | 81.90                 | 27.33               |
| C1                                             | H6     | 35.15          | -2.43847E-04       | 48.26                 | 35.04                 | 13.22               |
| C1                                             | H8     | -1.14          | 7.88614E-06        | -6.95                 | -1.13                 | -5.81               |
| C1                                             | H10    | -1.14          | 7.88614E-06        | -6.95                 | -1.13                 | -5.82               |
| C2                                             | H5     | 35.15          | -2.43847E-04       | 48.26                 | 35.04                 | 13.22               |
| C2                                             | H6     | 82.17          | -5.70019E-04       | 109.23                | 81.90                 | 27.33               |
| C2                                             | H7     | -1.14          | 7.88614E-06        | -6.95                 | -1.13                 | -5.81               |
| C2                                             | H9     | -1.14          | 7.88614E-06        | -6.95                 | -1.13                 | -5.82               |
| Average for $ \Delta_{cl}^{A,B} $ :            |        |                |                    |                       |                       | 13.0                |
| Standard deviation for $ \Delta_{cl}^{A,B} $ : |        |                |                    |                       |                       | 9.4                 |
| C...H in Eclipsed                              |        | CCSD/BBC1      |                    | HF                    |                       |                     |
| Atom A                                         | Atom B | $V_{cl}^{A,B}$ | $V_{cl}^{A,B} / E$ | Comput $V_{cl}^{A,B}$ | Expect $V_{cl}^{A,B}$ | $\Delta_{cl}^{A,B}$ |
| C1                                             | H5     | 83.83          | -5.81584E-04       | 112.51                | 83.56                 | 28.96               |
| C1                                             | H6     | 38.20          | -2.65018E-04       | 52.18                 | 38.08                 | 14.10               |
| C1                                             | H8     | -2.54          | 1.76089E-05        | -8.93                 | -2.53                 | -6.40               |
| C1                                             | H10    | -2.54          | 1.76089E-05        | -8.94                 | -2.53                 | -6.41               |
| C2                                             | H5     | 38.20          | -2.65018E-04       | 52.12                 | 38.08                 | 14.05               |
| C2                                             | H6     | 83.83          | -5.81584E-04       | 112.46                | 83.56                 | 28.90               |
| C2                                             | H7     | -2.54          | 1.76089E-05        | -8.93                 | -2.53                 | -6.40               |
| C2                                             | H9     | -2.54          | 1.76089E-05        | -8.93                 | -2.53                 | -6.40               |
| Average for $ \Delta_{cl}^{A,B} $ :            |        |                |                    |                       |                       | 14.0                |
| Standard deviation for $ \Delta_{cl}^{A,B} $ : |        |                |                    |                       |                       | 9.8                 |

**Table S73.** Using the CCSD/BBC1 data as a reference, analysis of relative errors  $\Delta_{XC}^{A,B}$  in the XC-term  $V_{XC}^{A,B}$  of interaction energies computed at HF for distant C,H atom-pairs in all conformers of glycol (values in kcal mol<sup>-1</sup>).

| C...H in LEC                                 |        | CCSD/BBC1      |                    | HF                    |                       |                     |
|----------------------------------------------|--------|----------------|--------------------|-----------------------|-----------------------|---------------------|
| Atom A                                       | Atom B | $V_{XC}^{A,B}$ | $V_{XC}^{A,B} / E$ | Comput $V_{XC}^{A,B}$ | Expect $V_{XC}^{A,B}$ | $\Delta_{XC}^{A,B}$ |
| C1                                           | H5     | -1.21          | 8.40036E-06        | -0.84                 | -1.21                 | 0.37                |
| C1                                           | H6     | -0.53          | 3.70975E-06        | -0.12                 | -0.53                 | 0.42                |
| C1                                           | H8     | -4.04          | 2.80583E-05        | -4.18                 | -4.03                 | -0.15               |
| C1                                           | H10    | -3.96          | 2.74736E-05        | -3.97                 | -3.95                 | -0.03               |
| C2                                           | H5     | -0.44          | 3.07551E-06        | -0.30                 | -0.44                 | 0.14                |
| C2                                           | H6     | -1.31          | 9.10774E-06        | -0.80                 | -1.31                 | 0.51                |
| C2                                           | H7     | -3.75          | 2.59890E-05        | -3.54                 | -3.73                 | 0.19                |
| C2                                           | H9     | -3.79          | 2.63220E-05        | -3.91                 | -3.78                 | -0.13               |
| Average for $ \Delta_{XC}^{A,B} $            |        |                |                    |                       |                       | 0.2                 |
| Standard deviation for $ \Delta_{XC}^{A,B} $ |        |                |                    |                       |                       | 0.2                 |

  

| C...H in Linear                              |        | CCSD/BBC1      |                    | HF                    |                       |                     |
|----------------------------------------------|--------|----------------|--------------------|-----------------------|-----------------------|---------------------|
| Atom A                                       | Atom B | $V_{XC}^{A,B}$ | $V_{XC}^{A,B} / E$ | Comput $V_{XC}^{A,B}$ | Expect $V_{XC}^{A,B}$ | $\Delta_{XC}^{A,B}$ |
| C1                                           | H5     | -1.32          | 9.17191E-06        | -0.85                 | -1.32                 | 0.47                |
| C1                                           | H6     | -0.50          | 3.45234E-06        | -0.31                 | -0.50                 | 0.19                |
| C1                                           | H8     | -3.79          | 2.62822E-05        | -3.61                 | -3.78                 | 0.17                |
| C1                                           | H10    | -3.79          | 2.62822E-05        | -3.61                 | -3.78                 | 0.17                |
| C2                                           | H5     | -0.50          | 3.45234E-06        | -0.31                 | -0.50                 | 0.19                |
| C2                                           | H6     | -1.32          | 9.17191E-06        | -0.85                 | -1.32                 | 0.47                |
| C2                                           | H7     | -3.79          | 2.62822E-05        | -3.61                 | -3.78                 | 0.17                |
| C2                                           | H9     | -3.79          | 2.62822E-05        | -3.61                 | -3.78                 | 0.17                |
| Average for $ \Delta_{XC}^{A,B} $            |        |                |                    |                       |                       | 0.2                 |
| Standard deviation for $ \Delta_{XC}^{A,B} $ |        |                |                    |                       |                       | 0.1                 |

  

| C...H in Eclipsed                            |        | CCSD/BBC1      |                    | HF                    |                       |                     |
|----------------------------------------------|--------|----------------|--------------------|-----------------------|-----------------------|---------------------|
| Atom A                                       | Atom B | $V_{XC}^{A,B}$ | $V_{XC}^{A,B} / E$ | Comput $V_{XC}^{A,B}$ | Expect $V_{XC}^{A,B}$ | $\Delta_{XC}^{A,B}$ |
| C1                                           | H5     | -1.43          | 9.88825E-06        | -0.89                 | -1.42                 | 0.53                |
| C1                                           | H6     | -0.48          | 3.36254E-06        | -0.29                 | -0.48                 | 0.20                |
| C1                                           | H8     | -4.06          | 2.82004E-05        | -3.94                 | -4.05                 | 0.11                |
| C1                                           | H10    | -4.06          | 2.82004E-05        | -3.94                 | -4.05                 | 0.11                |
| C2                                           | H5     | -0.48          | 3.36254E-06        | -0.29                 | -0.48                 | 0.20                |
| C2                                           | H6     | -1.43          | 9.88825E-06        | -0.89                 | -1.42                 | 0.53                |
| C2                                           | H7     | -4.06          | 2.82004E-05        | -3.95                 | -4.05                 | 0.11                |
| C2                                           | H9     | -4.06          | 2.82004E-05        | -3.94                 | -4.05                 | 0.11                |
| Average for $ \Delta_{XC}^{A,B} $            |        |                |                    |                       |                       | 0.2                 |
| Standard deviation for $ \Delta_{XC}^{A,B} $ |        |                |                    |                       |                       | 0.2                 |

**Table S74.** Using the CCSD/BBC1 data as a reference, analysis of relative errors  $\Delta_{\text{int}}^{\text{A,B}}$  in interaction energies  $E_{\text{int}}^{\text{A,B}}$  computed at HF for distant O,H atom-pairs in all conformers of glycol (values in kcal mol<sup>-1</sup>).

| O...H in LEC                                            |        | CCSD/BBC1                     |                                   | HF                                   |                                      |                                    |
|---------------------------------------------------------|--------|-------------------------------|-----------------------------------|--------------------------------------|--------------------------------------|------------------------------------|
| Atom A                                                  | Atom B | $E_{\text{int}}^{\text{A,B}}$ | $E_{\text{int}}^{\text{A,B}} / E$ | Comput $E_{\text{int}}^{\text{A,B}}$ | Expect $E_{\text{int}}^{\text{A,B}}$ | $\Delta_{\text{int}}^{\text{A,B}}$ |
| O3                                                      | H5     | -63.47                        | 4.40340E-04                       | -75.22                               | -63.27                               | -11.95                             |
| O3                                                      | H7     | 1.53                          | -1.05919E-05                      | 9.69                                 | 1.52                                 | 8.17                               |
| O3                                                      | H8     | -6.44                         | 4.46864E-05                       | 0.42                                 | -6.42                                | 6.84                               |
| O3                                                      | H9     | 1.74                          | -1.20837E-05                      | 8.66                                 | 1.74                                 | 6.92                               |
| O3                                                      | H10    | -4.72                         | 3.27422E-05                       | 3.02                                 | -4.70                                | 7.73                               |
| O4                                                      | H6     | -90.89                        | 6.30517E-04                       | -103.88                              | -90.60                               | -13.28                             |
| O4                                                      | H7     | -4.46                         | 3.09496E-05                       | 3.38                                 | -4.45                                | 7.83                               |
| O4                                                      | H8     | 0.02                          | -1.51058E-07                      | 5.79                                 | 0.02                                 | 5.77                               |
| O4                                                      | H9     | -3.22                         | 2.23074E-05                       | 5.50                                 | -3.21                                | 8.71                               |
| O4                                                      | H10    | 1.98                          | -1.37476E-05                      | 9.77                                 | 1.98                                 | 7.80                               |
| Average for $ \Delta_{\text{int}}^{\text{A,B}} $        |        |                               |                                   |                                      |                                      | 8.5                                |
| Std. deviation for $ \Delta_{\text{int}}^{\text{A,B}} $ |        |                               |                                   |                                      |                                      | 2.3                                |

| O...H in Linear                                         |        | CCSD/BBC1                     |                                   | HF                                   |                                      |                                    |
|---------------------------------------------------------|--------|-------------------------------|-----------------------------------|--------------------------------------|--------------------------------------|------------------------------------|
| Atom A                                                  | Atom B | $E_{\text{int}}^{\text{A,B}}$ | $E_{\text{int}}^{\text{A,B}} / E$ | Comput $E_{\text{int}}^{\text{A,B}}$ | Expect $E_{\text{int}}^{\text{A,B}}$ | $\Delta_{\text{int}}^{\text{A,B}}$ |
| O3                                                      | H5     | -50.37                        | 3.49449E-04                       | -60.55                               | -50.21                               | -10.34                             |
| O3                                                      | H7     | 2.11                          | -1.46101E-05                      | 9.91                                 | 2.10                                 | 7.81                               |
| O3                                                      | H8     | -3.97                         | 2.75121E-05                       | 3.68                                 | -3.95                                | 7.63                               |
| O3                                                      | H9     | 2.11                          | -1.46101E-05                      | 9.91                                 | 2.10                                 | 7.81                               |
| O3                                                      | H10    | -3.97                         | 2.75121E-05                       | 3.68                                 | -3.95                                | 7.63                               |
| O4                                                      | H6     | -50.37                        | 3.49449E-04                       | -60.55                               | -50.21                               | -10.34                             |
| O4                                                      | H7     | -3.97                         | 2.75121E-05                       | 3.68                                 | -3.95                                | 7.63                               |
| O4                                                      | H8     | 2.11                          | -1.46101E-05                      | 9.91                                 | 2.10                                 | 7.81                               |
| O4                                                      | H9     | -3.97                         | 2.75121E-05                       | 3.68                                 | -3.95                                | 7.63                               |
| O4                                                      | H10    | 2.11                          | -1.46101E-05                      | 9.91                                 | 2.10                                 | 7.81                               |
| Average for $ \Delta_{\text{int}}^{\text{A,B}} $        |        |                               |                                   |                                      |                                      | 8.2                                |
| Std. deviation for $ \Delta_{\text{int}}^{\text{A,B}} $ |        |                               |                                   |                                      |                                      | 1.1                                |



| O...H in Eclipsed                                       |        | CCSD/BBC1                     |                                   | HF                                   |                                      |                                    |
|---------------------------------------------------------|--------|-------------------------------|-----------------------------------|--------------------------------------|--------------------------------------|------------------------------------|
| Atom A                                                  | Atom B | $E_{\text{int}}^{\text{A,B}}$ | $E_{\text{int}}^{\text{A,B}} / E$ | Comput $E_{\text{int}}^{\text{A,B}}$ | Expect $E_{\text{int}}^{\text{A,B}}$ | $\Delta_{\text{int}}^{\text{A,B}}$ |
| O3                                                      | H5     | -59.43                        | 4.12334E-04                       | -71.32                               | -59.24                               | -12.08                             |
| O3                                                      | H7     | 3.69                          | -2.56299E-05                      | 10.84                                | 3.68                                 | 7.16                               |
| O3                                                      | H8     | -1.45                         | 1.00861E-05                       | 7.17                                 | -1.45                                | 8.62                               |
| O3                                                      | H9     | 3.69                          | -2.56299E-05                      | 10.84                                | 3.68                                 | 7.16                               |
| O3                                                      | H10    | -1.45                         | 1.00861E-05                       | 7.17                                 | -1.45                                | 8.62                               |
| O4                                                      | H6     | -59.43                        | 4.12334E-04                       | -71.32                               | -59.24                               | -12.08                             |
| O4                                                      | H7     | -1.45                         | 1.00861E-05                       | 7.17                                 | -1.45                                | 8.62                               |
| O4                                                      | H8     | 3.69                          | -2.56299E-05                      | 10.84                                | 3.68                                 | 7.16                               |
| O4                                                      | H9     | -1.45                         | 1.00861E-05                       | 7.17                                 | -1.45                                | 8.62                               |
| O4                                                      | H10    | 3.69                          | -2.56299E-05                      | 10.84                                | 3.68                                 | 7.16                               |
| Average for $ \Delta_{\text{int}}^{\text{A,B}} $        |        |                               |                                   |                                      |                                      | 8.7                                |
| Std. deviation for $ \Delta_{\text{int}}^{\text{A,B}} $ |        |                               |                                   |                                      |                                      | 1.9                                |

**Table S75.** Using the CCSD/BBC1 data as a reference, analysis of relative errors  $\Delta_{\text{cl}}^{\text{A,B}}$  of classical term  $V_{\text{cl}}^{\text{A,B}}$  of interaction energies computed at HF for distant O,H atom-pairs in all conformers of glycol (values in kcal mol<sup>-1</sup>).

| O...H in LEC                                           |        | CCSD/BBC1                    |                                  | HF                                  |                                     |                                   |
|--------------------------------------------------------|--------|------------------------------|----------------------------------|-------------------------------------|-------------------------------------|-----------------------------------|
| Atom A                                                 | Atom B | $V_{\text{cl}}^{\text{A,B}}$ | $V_{\text{cl}}^{\text{A,B}} / E$ | Comput $V_{\text{cl}}^{\text{A,B}}$ | Expect $V_{\text{cl}}^{\text{A,B}}$ | $\Delta_{\text{cl}}^{\text{A,B}}$ |
| O3                                                     | H5     | 79.50                        | -5.51515E-04                     | 106.02                              | 79.24                               | 26.77                             |
| O3                                                     | H7     | 48.29                        | -3.35024E-04                     | 64.12                               | 48.14                               | 15.99                             |
| O3                                                     | H8     | 0.12                         | -8.38500E-07                     | -4.55                               | 0.12                                | -4.67                             |
| O3                                                     | H9     | -1.10                        | 7.61256E-06                      | -6.66                               | -1.09                               | -5.57                             |
| O3                                                     | H10    | 39.11                        | -2.71330E-04                     | 53.14                               | 38.99                               | 14.15                             |
| O4                                                     | H6     | 86.47                        | -5.99872E-04                     | 114.17                              | 86.19                               | 27.98                             |
| O4                                                     | H7     | -0.83                        | 5.78789E-06                      | -6.85                               | -0.83                               | -6.02                             |
| O4                                                     | H8     | -1.27                        | 8.79525E-06                      | -7.48                               | -1.26                               | -6.21                             |
| O4                                                     | H9     | 79.50                        | -5.51515E-04                     | 106.02                              | 79.24                               | 26.77                             |
| O4                                                     | H10    | 48.29                        | -3.35024E-04                     | 64.12                               | 48.14                               | 15.99                             |
| Average for $ \Delta_{\text{cl}}^{\text{A,B}} $        |        |                              |                                  |                                     |                                     | 13.4                              |
| Std. deviation for $ \Delta_{\text{cl}}^{\text{A,B}} $ |        |                              |                                  |                                     |                                     | 9.6                               |

| <b>O...H in Linear</b>                   |               | <b>CCSD/BBC1</b> |                    | <b>HF</b>             |                       |                     |
|------------------------------------------|---------------|------------------|--------------------|-----------------------|-----------------------|---------------------|
| <b>Atom A</b>                            | <b>Atom B</b> | $V_{cl}^{A,B}$   | $V_{cl}^{A,B} / E$ | Comput $V_{cl}^{A,B}$ | Expect $V_{cl}^{A,B}$ | $\Delta_{cl}^{A,B}$ |
| O3                                       | H5            | -49.87           | 3.45955E-04        | -60.51                | -49.71                | -10.80              |
| O3                                       | H7            | 4.07             | -2.82240E-05       | 11.27                 | 4.06                  | 7.21                |
| O3                                       | H8            | 2.14             | -1.48185E-05       | 11.48                 | 2.13                  | 9.35                |
| O3                                       | H9            | 4.07             | -2.82240E-05       | 11.27                 | 4.06                  | 7.21                |
| O3                                       | H10           | 2.14             | -1.48185E-05       | 11.48                 | 2.13                  | 9.35                |
| O4                                       | H6            | -49.87           | 3.45955E-04        | -60.51                | -49.71                | -10.80              |
| O4                                       | H7            | 2.14             | -1.48185E-05       | 11.48                 | 2.13                  | 9.35                |
| O4                                       | H8            | 4.07             | -2.82240E-05       | 11.27                 | 4.06                  | 7.21                |
| O4                                       | H9            | 2.14             | -1.48185E-05       | 11.48                 | 2.13                  | 9.35                |
| O4                                       | H10           | 4.07             | -2.82240E-05       | 11.27                 | 4.06                  | 7.21                |
| Average for $ \Delta_{cl}^{A,B} $        |               |                  |                    |                       |                       | 8.8                 |
| Std. deviation for $ \Delta_{cl}^{A,B} $ |               |                  |                    |                       |                       | 1.5                 |

| <b>O...H in Eclipsed</b>                 |               | <b>CCSD/BBC1</b> |                    | <b>HF</b>             |                       |                     |
|------------------------------------------|---------------|------------------|--------------------|-----------------------|-----------------------|---------------------|
| <b>Atom A</b>                            | <b>Atom B</b> | $V_{cl}^{A,B}$   | $V_{cl}^{A,B} / E$ | Comput $V_{cl}^{A,B}$ | Expect $V_{cl}^{A,B}$ | $\Delta_{cl}^{A,B}$ |
| O3                                       | H5            | 83.83            | -5.81584E-04       | 112.51                | 83.56                 | 28.96               |
| O3                                       | H7            | 38.20            | -2.65018E-04       | 52.18                 | 38.08                 | 14.10               |
| O3                                       | H8            | -2.54            | 1.76089E-05        | -8.93                 | -2.53                 | -6.40               |
| O3                                       | H9            | -2.54            | 1.76089E-05        | -8.94                 | -2.53                 | -6.41               |
| O3                                       | H10           | 38.20            | -2.65018E-04       | 52.12                 | 38.08                 | 14.05               |
| O4                                       | H6            | 83.83            | -5.81584E-04       | 112.46                | 83.56                 | 28.90               |
| O4                                       | H7            | -2.54            | 1.76089E-05        | -8.93                 | -2.53                 | -6.40               |
| O4                                       | H8            | -2.54            | 1.76089E-05        | -8.93                 | -2.53                 | -6.40               |
| O4                                       | H9            | 83.83            | -5.81584E-04       | 112.51                | 83.56                 | 28.96               |
| O4                                       | H10           | 38.20            | -2.65018E-04       | 52.18                 | 38.08                 | 14.10               |
| Average for $ \Delta_{cl}^{A,B} $        |               |                  |                    |                       |                       | 14.0                |
| Std. deviation for $ \Delta_{cl}^{A,B} $ |               |                  |                    |                       |                       | 9.8                 |

**Table S76.** Using the CCSD/BBC1 data as a reference, analysis of relative errors  $\Delta_{XC}^{A,B}$  of the XC-term  $V_{XC}^{A,B}$  of interaction energies computed at HF for distant O,H atom-pairs in all conformers of glycol (values in kcal mol<sup>-1</sup>).

| O...H in LEC                             |        | CCSD/BBC1      |                    | HF                    |                       |                     |
|------------------------------------------|--------|----------------|--------------------|-----------------------|-----------------------|---------------------|
| Atom A                                   | Atom B | $V_{XC}^{A,B}$ | $V_{XC}^{A,B} / E$ | Comput $V_{XC}^{A,B}$ | Expect $V_{XC}^{A,B}$ | $\Delta_{XC}^{A,B}$ |
| O3                                       | H5     | -0.35          | 2.44852E-06        | -0.04                 | -0.35                 | 0.31                |
| O3                                       | H7     | -2.00          | 1.38900E-05        | -1.27                 | -2.00                 | 0.72                |
| O3                                       | H8     | -6.27          | 4.34686E-05        | -7.73                 | -6.25                 | -1.48               |
| O3                                       | H9     | -1.14          | 7.90820E-06        | -0.66                 | -1.14                 | 0.48                |
| O3                                       | H10    | -6.42          | 4.45528E-05        | -7.91                 | -6.40                 | -1.51               |
| O4                                       | H6     | -3.03          | 2.10430E-05        | -1.26                 | -3.02                 | 1.76                |
| O4                                       | H7     | -6.28          | 4.35390E-05        | -7.92                 | -6.26                 | -1.66               |
| O4                                       | H8     | -0.86          | 5.98068E-06        | -0.58                 | -0.86                 | 0.28                |
| O4                                       | H9     | -6.50          | 4.51269E-05        | -7.89                 | -6.48                 | -1.40               |
| O4                                       | H10    | -1.99          | 1.38080E-05        | -1.30                 | -1.98                 | 0.69                |
| Average for $ \Delta_{XC}^{A,B} $        |        |                |                    |                       |                       | 1.0                 |
| Std. deviation for $ \Delta_{XC}^{A,B} $ |        |                |                    |                       |                       | 0.6                 |

| O...H in Linear                          |        | CCSD/BBC1      |                    | HF                    |                       |                     |
|------------------------------------------|--------|----------------|--------------------|-----------------------|-----------------------|---------------------|
| Atom A                                   | Atom B | $V_{XC}^{A,B}$ | $V_{XC}^{A,B} / E$ | Comput $V_{XC}^{A,B}$ | Expect $V_{XC}^{A,B}$ | $\Delta_{XC}^{A,B}$ |
| O3                                       | H5     | -0.50          | 3.49384E-06        | -0.05                 | -0.50                 | 0.46                |
| O3                                       | H7     | -1.96          | 1.36138E-05        | -1.36                 | -1.96                 | 0.60                |
| O3                                       | H8     | -6.10          | 4.23306E-05        | -7.80                 | -6.08                 | -1.72               |
| O3                                       | H9     | -1.96          | 1.36138E-05        | -1.36                 | -1.96                 | 0.60                |
| O3                                       | H10    | -6.10          | 4.23306E-05        | -7.80                 | -6.08                 | -1.72               |
| O4                                       | H6     | -0.50          | 3.49384E-06        | -0.05                 | -0.50                 | 0.46                |
| O4                                       | H7     | -6.10          | 4.23306E-05        | -7.80                 | -6.08                 | -1.72               |
| O4                                       | H8     | -1.96          | 1.36138E-05        | -1.36                 | -1.96                 | 0.60                |
| O4                                       | H9     | -6.10          | 4.23306E-05        | -7.80                 | -6.08                 | -1.72               |
| O4                                       | H10    | -1.96          | 1.36138E-05        | -1.36                 | -1.96                 | 0.60                |
| Average for $ \Delta_{XC}^{A,B} $        |        |                |                    |                       |                       | 1.0                 |
| Std. deviation for $ \Delta_{XC}^{A,B} $ |        |                |                    |                       |                       | 0.6                 |

| O...H in Eclipsed                        |        | CCSD/BBC1      |                    | HF                    |                       |                     |
|------------------------------------------|--------|----------------|--------------------|-----------------------|-----------------------|---------------------|
| Atom A                                   | Atom B | $V_{XC}^{A,B}$ | $V_{XC}^{A,B} / E$ | Comput $V_{XC}^{A,B}$ | Expect $V_{XC}^{A,B}$ | $\Delta_{XC}^{A,B}$ |
| O3                                       | H5     | -0.67          | 4.62679E-06        | -0.11                 | -0.66                 | 0.56                |
| O3                                       | H7     | -0.70          | 4.84171E-06        | -0.26                 | -0.70                 | 0.44                |
| O3                                       | H8     | -6.58          | 4.56687E-05        | -8.41                 | -6.56                 | -1.85               |
| O3                                       | H9     | -0.70          | 4.84171E-06        | -0.26                 | -0.70                 | 0.44                |
| O3                                       | H10    | -6.58          | 4.56687E-05        | -8.41                 | -6.56                 | -1.85               |
| O4                                       | H6     | -0.67          | 4.62679E-06        | -0.11                 | -0.66                 | 0.56                |
| O4                                       | H7     | -6.58          | 4.56687E-05        | -8.41                 | -6.56                 | -1.85               |
| O4                                       | H8     | -0.70          | 4.84171E-06        | -0.26                 | -0.70                 | 0.44                |
| O4                                       | H9     | -6.58          | 4.56687E-05        | -8.41                 | -6.56                 | -1.85               |
| O4                                       | H10    | -0.70          | 4.84171E-06        | -0.26                 | -0.70                 | 0.44                |
| Average for $ \Delta_{XC}^{A,B} $        |        |                |                    |                       |                       | 1.0                 |
| Std. deviation for $ \Delta_{XC}^{A,B} $ |        |                |                    |                       |                       | 0.7                 |

**Table S77.** Using the CCSD/BBC1 data as a reference, analysis of relative errors  $\Delta_{int}^{A,B}$  in interaction energies  $E_{int}^{A,B}$  computed at HF for distant H,H atom-pairs in all conformers of glycol (values in kcal mol<sup>-1</sup>).

| H...H in LEC                              |        | CCSD/BBC1       |                     | HF                     |                        |                      |
|-------------------------------------------|--------|-----------------|---------------------|------------------------|------------------------|----------------------|
| Atom A                                    | Atom B | $E_{int}^{A,B}$ | $E_{int}^{A,B} / E$ | Comput $E_{int}^{A,B}$ | Expect $E_{int}^{A,B}$ | $\Delta_{int}^{A,B}$ |
| H5                                        | H6     | 36.97           | -2.56444E-04        | 41.19                  | 36.85                  | 4.34                 |
| H5                                        | H7     | -1.91           | 1.32190E-05         | -6.20                  | -1.90                  | -4.30                |
| H5                                        | H8     | -0.65           | 4.54108E-06         | -2.95                  | -0.65                  | -2.29                |
| H5                                        | H9     | -2.20           | 1.52426E-05         | -6.74                  | -2.19                  | -4.54                |
| H5                                        | H10    | -1.79           | 1.23902E-05         | -4.51                  | -1.78                  | -2.73                |
| H6                                        | H7     | -1.78           | 1.23769E-05         | -5.13                  | -1.78                  | -3.36                |
| H6                                        | H8     | -0.43           | 2.95773E-06         | -3.85                  | -0.42                  | -3.42                |
| H6                                        | H9     | -1.50           | 1.03754E-05         | -4.44                  | -1.49                  | -2.94                |
| H6                                        | H10    | -1.52           | 1.05510E-05         | -5.76                  | -1.52                  | -4.24                |
| H7                                        | H8     | -0.42           | 2.91928E-06         | 0.31                   | -0.42                  | 0.73                 |
| H7                                        | H9     | -2.32           | 1.60696E-05         | -2.64                  | -2.31                  | -0.33                |
| H7                                        | H10    | -0.55           | 3.79630E-06         | -0.06                  | -0.55                  | 0.48                 |
| H8                                        | H9     | -0.32           | 2.23740E-06         | 0.41                   | -0.32                  | 0.74                 |
| H8                                        | H10    | -2.38           | 1.65337E-05         | -2.84                  | -2.38                  | -0.47                |
| H9                                        | H10    | -0.25           | 1.74888E-06         | 0.53                   | -0.25                  | 0.78                 |
| Average for $ \Delta_{int}^{A,B} $        |        |                 |                     |                        |                        | 2.4                  |
| Std. deviation for $ \Delta_{int}^{A,B} $ |        |                 |                     |                        |                        | 1.6                  |

| <b>H...H in Linear</b>                                  |               | <b>CCSD/BBC1</b>              |                                   | <b>HF</b>                            |                                      |                                    |
|---------------------------------------------------------|---------------|-------------------------------|-----------------------------------|--------------------------------------|--------------------------------------|------------------------------------|
| <b>Atom A</b>                                           | <b>Atom B</b> | $E_{\text{int}}^{\text{A,B}}$ | $E_{\text{int}}^{\text{A,B}} / E$ | Comput $E_{\text{int}}^{\text{A,B}}$ | Expect $E_{\text{int}}^{\text{A,B}}$ | $\Delta_{\text{int}}^{\text{A,B}}$ |
| H5                                                      | H6            | 22.72                         | -1.57635E-04                      | 26.23                                | 22.65                                | 3.58                               |
| H5                                                      | H7            | -1.84                         | 1.27666E-05                       | -6.09                                | -1.83                                | -4.26                              |
| H5                                                      | H8            | -1.82                         | 1.25965E-05                       | -4.59                                | -1.81                                | -2.78                              |
| H5                                                      | H9            | -1.84                         | 1.27666E-05                       | -6.09                                | -1.83                                | -4.26                              |
| H5                                                      | H10           | -1.82                         | 1.25965E-05                       | -4.59                                | -1.81                                | -2.78                              |
| H6                                                      | H7            | -1.82                         | 1.25965E-05                       | -4.59                                | -1.81                                | -2.78                              |
| H6                                                      | H8            | -1.84                         | 1.27666E-05                       | -6.09                                | -1.83                                | -4.26                              |
| H6                                                      | H9            | -1.82                         | 1.25965E-05                       | -4.59                                | -1.81                                | -2.78                              |
| H6                                                      | H10           | -1.84                         | 1.27666E-05                       | -6.09                                | -1.83                                | -4.26                              |
| H7                                                      | H8            | -0.57                         | 3.92163E-06                       | -0.03                                | -0.56                                | 0.54                               |
| H7                                                      | H9            | -2.51                         | 1.73979E-05                       | -2.75                                | -2.50                                | -0.25                              |
| H7                                                      | H10           | -0.46                         | 3.19134E-06                       | 0.38                                 | -0.46                                | 0.84                               |
| H8                                                      | H9            | -0.46                         | 3.19134E-06                       | 0.38                                 | -0.46                                | 0.84                               |
| H8                                                      | H10           | -2.51                         | 1.73979E-05                       | -2.75                                | -2.50                                | -0.25                              |
| H9                                                      | H10           | -0.57                         | 3.92163E-06                       | -0.03                                | -0.56                                | 0.54                               |
| Average for $ \Delta_{\text{int}}^{\text{A,B}} $        |               |                               |                                   |                                      |                                      | 2.3                                |
| Std. deviation for $ \Delta_{\text{int}}^{\text{A,B}} $ |               |                               |                                   |                                      |                                      | 1.6                                |

| <b>H...H in Eclipsed</b>                                |               | <b>CCSD/BBC1</b>              |                                   | <b>HF</b>                            |                                      |                                    |
|---------------------------------------------------------|---------------|-------------------------------|-----------------------------------|--------------------------------------|--------------------------------------|------------------------------------|
| <b>Atom A</b>                                           | <b>Atom B</b> | $E_{\text{int}}^{\text{A,B}}$ | $E_{\text{int}}^{\text{A,B}} / E$ | Comput $E_{\text{int}}^{\text{A,B}}$ | Expect $E_{\text{int}}^{\text{A,B}}$ | $\Delta_{\text{int}}^{\text{A,B}}$ |
| H5                                                      | H6            | 25.93                         | -1.79929E-04                      | 29.92                                | 25.85                                | 4.07                               |
| H5                                                      | H7            | -3.37                         | 2.33517E-05                       | -8.03                                | -3.36                                | -4.68                              |
| H5                                                      | H8            | -2.23                         | 1.54635E-05                       | -4.92                                | -2.22                                | -2.69                              |
| H5                                                      | H9            | -3.37                         | 2.33517E-05                       | -8.03                                | -3.36                                | -4.68                              |
| H5                                                      | H10           | -2.23                         | 1.54635E-05                       | -4.92                                | -2.22                                | -2.69                              |
| H6                                                      | H7            | -2.23                         | 1.54635E-05                       | -4.92                                | -2.22                                | -2.69                              |
| H6                                                      | H8            | -3.37                         | 2.33517E-05                       | -8.03                                | -3.36                                | -4.68                              |
| H6                                                      | H9            | -2.23                         | 1.54635E-05                       | -4.92                                | -2.22                                | -2.69                              |
| H6                                                      | H10           | -3.37                         | 2.33517E-05                       | -8.03                                | -3.36                                | -4.68                              |
| H7                                                      | H8            | -0.88                         | 6.13093E-06                       | 0.43                                 | -0.88                                | 1.31                               |
| H7                                                      | H9            | -2.65                         | 1.83821E-05                       | -2.56                                | -2.64                                | 0.08                               |
| H7                                                      | H10           | -0.25                         | 1.76286E-06                       | 0.70                                 | -0.25                                | 0.95                               |
| H8                                                      | H9            | -0.25                         | 1.76286E-06                       | 0.70                                 | -0.25                                | 0.95                               |
| H8                                                      | H10           | -2.65                         | 1.83821E-05                       | -2.56                                | -2.64                                | 0.08                               |
| H9                                                      | H10           | -0.88                         | 6.13093E-06                       | 0.43                                 | -0.88                                | 1.31                               |
| Average for $ \Delta_{\text{int}}^{\text{A,B}} $        |               |                               |                                   |                                      |                                      | 2.5                                |
| Std. deviation for $ \Delta_{\text{int}}^{\text{A,B}} $ |               |                               |                                   |                                      |                                      | 1.7                                |

**Table S78.** Using the CCSD/BBC1 data as a reference, analysis of relative errors  $\Delta_{\text{cl}}^{\text{A,B}}$  of classical term  $V_{\text{cl}}^{\text{A,B}}$  of interaction energies computed at HF for distant H,H atom-pairs in all conformers of glycol (values in kcal mol<sup>-1</sup>).

| <b>H...H in LEC</b>                                    |               | <b>CCSD/BBC1</b>             |                                  | <b>HF</b>                           |                                     |                                   |
|--------------------------------------------------------|---------------|------------------------------|----------------------------------|-------------------------------------|-------------------------------------|-----------------------------------|
| <b>Atom A</b>                                          | <b>Atom B</b> | $V_{\text{cl}}^{\text{A,B}}$ | $V_{\text{cl}}^{\text{A,B}} / E$ | Comput $V_{\text{cl}}^{\text{A,B}}$ | Expect $V_{\text{cl}}^{\text{A,B}}$ | $\Delta_{\text{cl}}^{\text{A,B}}$ |
| H5                                                     | H6            | 37.09                        | -2.57280E-04                     | 41.21                               | 36.97                               | 4.24                              |
| H5                                                     | H7            | -1.73                        | 1.19752E-05                      | -6.10                               | -1.72                               | -4.38                             |
| H5                                                     | H8            | -0.59                        | 4.11552E-06                      | -2.90                               | -0.59                               | -2.31                             |
| H5                                                     | H9            | -2.11                        | 1.46141E-05                      | -6.68                               | -2.10                               | -4.58                             |
| H5                                                     | H10           | -1.71                        | 1.18685E-05                      | -4.49                               | -1.71                               | -2.79                             |
| H6                                                     | H7            | -1.70                        | 1.17605E-05                      | -5.13                               | -1.69                               | -3.44                             |
| H6                                                     | H8            | -0.08                        | 5.40273E-07                      | -3.51                               | -0.08                               | -3.43                             |
| H6                                                     | H9            | -1.41                        | 9.76436E-06                      | -4.42                               | -1.40                               | -3.02                             |
| H6                                                     | H10           | -1.38                        | 9.58579E-06                      | -5.70                               | -1.38                               | -4.32                             |
| H7                                                     | H8            | 0.20                         | -1.38967E-06                     | 0.66                                | 0.20                                | 0.46                              |
| H7                                                     | H9            | 0.69                         | -4.78518E-06                     | 1.16                                | 0.69                                | 0.48                              |
| H7                                                     | H10           | 0.08                         | -5.50299E-07                     | 0.44                                | 0.08                                | 0.36                              |
| H8                                                     | H9            | 0.26                         | -1.82468E-06                     | 0.83                                | 0.26                                | 0.56                              |
| H8                                                     | H10           | 0.67                         | -4.65740E-06                     | 0.93                                | 0.67                                | 0.26                              |
| H9                                                     | H10           | 0.30                         | -2.06546E-06                     | 0.91                                | 0.30                                | 0.61                              |
| Average for $ \Delta_{\text{cl}}^{\text{A,B}} $        |               |                              |                                  |                                     |                                     | 2.4                               |
| Std. deviation for $ \Delta_{\text{cl}}^{\text{A,B}} $ |               |                              |                                  |                                     |                                     | 1.7                               |

  

| <b>H...H in Linear</b>                                 |               | <b>CCSD/BBC1</b>             |                                  | <b>HF</b>                           |                                     |                                   |
|--------------------------------------------------------|---------------|------------------------------|----------------------------------|-------------------------------------|-------------------------------------|-----------------------------------|
| <b>Atom A</b>                                          | <b>Atom B</b> | $V_{\text{cl}}^{\text{A,B}}$ | $V_{\text{cl}}^{\text{A,B}} / E$ | Comput $V_{\text{cl}}^{\text{A,B}}$ | Expect $V_{\text{cl}}^{\text{A,B}}$ | $\Delta_{\text{cl}}^{\text{A,B}}$ |
| H5                                                     | H6            | 22.91                        | -1.58934E-04                     | 26.24                               | 22.84                               | 3.40                              |
| H5                                                     | H7            | -1.74                        | 1.20370E-05                      | -6.02                               | -1.73                               | -4.29                             |
| H5                                                     | H8            | -1.78                        | 1.23721E-05                      | -4.57                               | -1.78                               | -2.79                             |
| H5                                                     | H9            | -1.74                        | 1.20370E-05                      | -6.02                               | -1.73                               | -4.29                             |
| H5                                                     | H10           | -1.78                        | 1.23721E-05                      | -4.57                               | -1.78                               | -2.79                             |
| H6                                                     | H7            | -1.78                        | 1.23721E-05                      | -4.57                               | -1.78                               | -2.79                             |
| H6                                                     | H8            | -1.74                        | 1.20370E-05                      | -6.02                               | -1.73                               | -4.29                             |
| H6                                                     | H9            | -1.78                        | 1.23721E-05                      | -4.57                               | -1.78                               | -2.79                             |
| H6                                                     | H10           | -1.74                        | 1.20370E-05                      | -6.02                               | -1.73                               | -4.29                             |
| H7                                                     | H8            | 0.08                         | -5.35901E-07                     | 0.45                                | 0.08                                | 0.37                              |
| H7                                                     | H9            | 0.67                         | -4.65362E-06                     | 1.06                                | 0.67                                | 0.39                              |
| H7                                                     | H10           | 0.21                         | -1.46599E-06                     | 0.74                                | 0.21                                | 0.53                              |
| H8                                                     | H9            | 0.21                         | -1.46599E-06                     | 0.74                                | 0.21                                | 0.53                              |
| H8                                                     | H10           | 0.67                         | -4.65362E-06                     | 1.06                                | 0.67                                | 0.39                              |
| H9                                                     | H10           | 0.08                         | -5.35901E-07                     | 0.45                                | 0.08                                | 0.37                              |
| Average for $ \Delta_{\text{cl}}^{\text{A,B}} $        |               |                              |                                  |                                     |                                     | 2.3                               |
| Std. deviation for $ \Delta_{\text{cl}}^{\text{A,B}} $ |               |                              |                                  |                                     |                                     | 1.7                               |

| H...H in Eclipsed                        |        | CCSD/BBC1      |                    | HF                    |                       |                     |
|------------------------------------------|--------|----------------|--------------------|-----------------------|-----------------------|---------------------|
| Atom A                                   | Atom B | $V_{cl}^{A,B}$ | $V_{cl}^{A,B} / E$ | Comput $V_{cl}^{A,B}$ | Expect $V_{cl}^{A,B}$ | $\Delta_{cl}^{A,B}$ |
| H5                                       | H6     | 26.14          | -1.81338E-04       | 29.92                 | 26.05                 | 3.87                |
| H5                                       | H7     | -3.23          | 2.23898E-05        | -7.94                 | -3.22                 | -4.73               |
| H5                                       | H8     | -2.19          | 1.52172E-05        | -4.90                 | -2.19                 | -2.71               |
| H5                                       | H9     | -3.23          | 2.23898E-05        | -7.94                 | -3.22                 | -4.73               |
| H5                                       | H10    | -2.19          | 1.52172E-05        | -4.90                 | -2.19                 | -2.71               |
| H6                                       | H7     | -2.19          | 1.52172E-05        | -4.90                 | -2.19                 | -2.71               |
| H6                                       | H8     | -3.23          | 2.23898E-05        | -7.94                 | -3.22                 | -4.73               |
| H6                                       | H9     | -2.19          | 1.52172E-05        | -4.90                 | -2.19                 | -2.71               |
| H6                                       | H10    | -3.23          | 2.23898E-05        | -7.94                 | -3.22                 | -4.72               |
| H7                                       | H8     | 0.58           | -3.99386E-06       | 1.54                  | 0.57                  | 0.97                |
| H7                                       | H9     | 0.80           | -5.52134E-06       | 1.62                  | 0.79                  | 0.82                |
| H7                                       | H10    | 0.25           | -1.76849E-06       | 0.95                  | 0.25                  | 0.70                |
| H8                                       | H9     | 0.25           | -1.76849E-06       | 0.95                  | 0.25                  | 0.70                |
| H8                                       | H10    | 0.80           | -5.52134E-06       | 1.62                  | 0.79                  | 0.82                |
| H9                                       | H10    | 0.58           | -3.99386E-06       | 1.54                  | 0.57                  | 0.97                |
| Average for $ \Delta_{cl}^{A,B} $        |        |                |                    |                       |                       | 2.6                 |
| Std. deviation for $ \Delta_{cl}^{A,B} $ |        |                |                    |                       |                       | 1.7                 |

**Table S79.** Using the CCSD/BBC1 data as a reference, analysis of relative errors  $\Delta_{XC}^{A,B}$  in the XC-term  $V_{XC}^{A,B}$  of interaction energies computed at HF for distant H,H atom-pairs in all conformers of glycol (values in kcal mol<sup>-1</sup>).

| H...H in LEC                             |        | CCSD/BBC1      |                    | HF                    |                       |                     |
|------------------------------------------|--------|----------------|--------------------|-----------------------|-----------------------|---------------------|
| Atom A                                   | Atom B | $V_{XC}^{A,B}$ | $V_{XC}^{A,B} / E$ | Comput $V_{XC}^{A,B}$ | Expect $V_{XC}^{A,B}$ | $\Delta_{XC}^{A,B}$ |
| H5                                       | H6     | -0.12          | 8.35982E-07        | -0.02                 | -0.12                 | 0.10                |
| H5                                       | H7     | -0.18          | 1.24377E-06        | -0.10                 | -0.18                 | 0.08                |
| H5                                       | H8     | -0.06          | 4.25557E-07        | -0.04                 | -0.06                 | 0.02                |
| H5                                       | H9     | -0.09          | 6.28456E-07        | -0.05                 | -0.09                 | 0.04                |
| H5                                       | H10    | -0.08          | 5.21707E-07        | -0.02                 | -0.07                 | 0.06                |
| H6                                       | H7     | -0.09          | 6.16356E-07        | -0.01                 | -0.09                 | 0.08                |
| H6                                       | H8     | -0.35          | 2.41746E-06        | -0.33                 | -0.35                 | 0.01                |
| H6                                       | H9     | -0.09          | 6.11051E-07        | -0.01                 | -0.09                 | 0.08                |
| H6                                       | H10    | -0.14          | 9.65231E-07        | -0.06                 | -0.14                 | 0.08                |
| H7                                       | H8     | -0.62          | 4.30895E-06        | -0.35                 | -0.62                 | 0.27                |
| H7                                       | H9     | -3.01          | 2.08548E-05        | -3.81                 | -3.00                 | -0.81               |
| H7                                       | H10    | -0.63          | 4.34660E-06        | -0.50                 | -0.62                 | 0.12                |
| H8                                       | H9     | -0.59          | 4.06207E-06        | -0.41                 | -0.58                 | 0.17                |
| H8                                       | H10    | -3.05          | 2.11911E-05        | -3.77                 | -3.04                 | -0.73               |
| H9                                       | H10    | -0.55          | 3.81434E-06        | -0.38                 | -0.55                 | 0.16                |
| Average for $ \Delta_{XC}^{A,B} $        |        |                |                    |                       |                       | 0.2                 |
| Std. deviation for $ \Delta_{XC}^{A,B} $ |        |                |                    |                       |                       | 0.2                 |

| H...H in Linear                          |        | CCSD/BBC1      |                    | HF                    |                       |                     |
|------------------------------------------|--------|----------------|--------------------|-----------------------|-----------------------|---------------------|
| Atom A                                   | Atom B | $V_{XC}^{A,B}$ | $V_{XC}^{A,B} / E$ | Comput $V_{XC}^{A,B}$ | Expect $V_{XC}^{A,B}$ | $\Delta_{XC}^{A,B}$ |
| H5                                       | H6     | -0.19          | 1.29892E-06        | 0.00                  | -0.19                 | 0.18                |
| H5                                       | H7     | -0.11          | 7.29610E-07        | -0.08                 | -0.10                 | 0.03                |
| H5                                       | H8     | -0.03          | 2.24489E-07        | -0.02                 | -0.03                 | 0.02                |
| H5                                       | H9     | -0.11          | 7.29610E-07        | -0.08                 | -0.10                 | 0.03                |
| H5                                       | H10    | -0.03          | 2.24489E-07        | -0.02                 | -0.03                 | 0.02                |
| H6                                       | H7     | -0.03          | 2.24489E-07        | -0.02                 | -0.03                 | 0.02                |
| H6                                       | H8     | -0.11          | 7.29610E-07        | -0.08                 | -0.10                 | 0.03                |
| H6                                       | H9     | -0.03          | 2.24489E-07        | -0.02                 | -0.03                 | 0.02                |
| H6                                       | H10    | -0.11          | 7.29610E-07        | -0.08                 | -0.10                 | 0.03                |
| H7                                       | H8     | -0.64          | 4.45753E-06        | -0.47                 | -0.64                 | 0.17                |
| H7                                       | H9     | -3.18          | 2.20515E-05        | -3.81                 | -3.17                 | -0.65               |
| H7                                       | H10    | -0.67          | 4.65732E-06        | -0.35                 | -0.67                 | 0.32                |
| H8                                       | H9     | -0.67          | 4.65732E-06        | -0.35                 | -0.67                 | 0.32                |
| H8                                       | H10    | -3.18          | 2.20515E-05        | -3.81                 | -3.17                 | -0.65               |
| H9                                       | H10    | -0.64          | 4.45753E-06        | -0.47                 | -0.64                 | 0.17                |
| Average for $ \Delta_{XC}^{A,B} $        |        |                |                    |                       |                       | 0.2                 |
| Std. deviation for $ \Delta_{XC}^{A,B} $ |        |                |                    |                       |                       | 0.2                 |

| H...H in Eclipsed                        |        | CCSD/BBC1      |                    | HF                    |                       |                     |
|------------------------------------------|--------|----------------|--------------------|-----------------------|-----------------------|---------------------|
| Atom A                                   | Atom B | $V_{XC}^{A,B}$ | $V_{XC}^{A,B} / E$ | Comput $V_{XC}^{A,B}$ | Expect $V_{XC}^{A,B}$ | $\Delta_{XC}^{A,B}$ |
| H5                                       | H6     | -0.20          | 1.40935E-06        | 0.00                  | -0.20                 | 0.20                |
| H5                                       | H7     | -0.14          | 9.61846E-07        | -0.09                 | -0.14                 | 0.05                |
| H5                                       | H8     | -0.04          | 2.46282E-07        | -0.02                 | -0.04                 | 0.02                |
| H5                                       | H9     | -0.14          | 9.61846E-07        | -0.09                 | -0.14                 | 0.05                |
| H5                                       | H10    | -0.04          | 2.46282E-07        | -0.02                 | -0.04                 | 0.02                |
| H6                                       | H7     | -0.04          | 2.46282E-07        | -0.02                 | -0.04                 | 0.02                |
| H6                                       | H8     | -0.14          | 9.61846E-07        | -0.09                 | -0.14                 | 0.05                |
| H6                                       | H9     | -0.04          | 2.46282E-07        | -0.02                 | -0.04                 | 0.02                |
| H6                                       | H10    | -0.14          | 9.61846E-07        | -0.09                 | -0.14                 | 0.05                |
| H7                                       | H8     | -1.46          | 1.01248E-05        | -1.11                 | -1.45                 | 0.34                |
| H7                                       | H9     | -3.45          | 2.39035E-05        | -4.18                 | -3.43                 | -0.74               |
| H7                                       | H10    | -0.51          | 3.53135E-06        | -0.25                 | -0.51                 | 0.25                |
| H8                                       | H9     | -0.51          | 3.53135E-06        | -0.25                 | -0.51                 | 0.25                |
| H8                                       | H10    | -3.45          | 2.39035E-05        | -4.18                 | -3.43                 | -0.74               |
| H9                                       | H10    | -1.46          | 1.01248E-05        | -1.11                 | -1.45                 | 0.34                |
| Average for $ \Delta_{XC}^{A,B} $        |        |                |                    |                       |                       | 0.2                 |
| Std. deviation for $ \Delta_{XC}^{A,B} $ |        |                |                    |                       |                       | 0.2                 |



**Table S80.** Using the CCSD/BBC1 data as a reference, analysis of relative errors  $\Delta_{\text{int}}^{\text{A,B}}$  in interaction energies  $E_{\text{int}}^{\text{A,B}}$  computed at B3LYP for distant C,H atom-pairs in all conformers of glycol (values in kcal mol<sup>-1</sup>).

| <b>C...H in LEC</b>                                           |               | <b>CCSD/BBC1</b>              |                                   | <b>B3LYP</b>                         |                                      |                                    |
|---------------------------------------------------------------|---------------|-------------------------------|-----------------------------------|--------------------------------------|--------------------------------------|------------------------------------|
| <b>Atom A</b>                                                 | <b>Atom B</b> | $E_{\text{int}}^{\text{A,B}}$ | $E_{\text{int}}^{\text{A,B}} / E$ | Comput $E_{\text{int}}^{\text{A,B}}$ | Expect $E_{\text{int}}^{\text{A,B}}$ | $\Delta_{\text{int}}^{\text{A,B}}$ |
| C1                                                            | H5            | 78.29                         | -5.43115E-04                      | 71.36                                | 78.49                                | -7.13                              |
| C1                                                            | H6            | 47.76                         | -3.31314E-04                      | 42.96                                | 47.88                                | -4.92                              |
| C1                                                            | H8            | -3.92                         | 2.72198E-05                       | -2.34                                | -3.93                                | 1.59                               |
| C1                                                            | H10           | -5.06                         | 3.50861E-05                       | -3.17                                | -5.07                                | 1.90                               |
| C2                                                            | H5            | 38.67                         | -2.68255E-04                      | 34.76                                | 38.77                                | -4.00                              |
| C2                                                            | H6            | 85.16                         | -5.90764E-04                      | 78.19                                | 85.37                                | -7.18                              |
| C2                                                            | H7            | -4.58                         | 3.17769E-05                       | -2.45                                | -4.59                                | 2.14                               |
| C2                                                            | H9            | -5.06                         | 3.51173E-05                       | -3.34                                | -5.07                                | 1.73                               |
| Average for $ \Delta_{\text{int}}^{\text{A,B}} $ :            |               |                               |                                   |                                      |                                      | 3.8                                |
| Standard deviation for $ \Delta_{\text{int}}^{\text{A,B}} $ : |               |                               |                                   |                                      |                                      | 2.4                                |

  

| <b>C...H in Linear</b>                                        |               | <b>CCSD/BBC1</b>              |                                   | <b>B3LYP</b>                         |                                      |                                    |
|---------------------------------------------------------------|---------------|-------------------------------|-----------------------------------|--------------------------------------|--------------------------------------|------------------------------------|
| <b>Atom A</b>                                                 | <b>Atom B</b> | $E_{\text{int}}^{\text{A,B}}$ | $E_{\text{int}}^{\text{A,B}} / E$ | Comput $E_{\text{int}}^{\text{A,B}}$ | Expect $E_{\text{int}}^{\text{A,B}}$ | $\Delta_{\text{int}}^{\text{A,B}}$ |
| C1                                                            | H5            | 80.84                         | -5.60847E-04                      | 74.01                                | 81.05                                | -7.04                              |
| C1                                                            | H6            | 34.65                         | -2.40395E-04                      | 31.05                                | 34.74                                | -3.69                              |
| C1                                                            | H8            | -4.93                         | 3.41684E-05                       | -2.72                                | -4.94                                | 2.22                               |
| C1                                                            | H10           | -4.93                         | 3.41684E-05                       | -2.72                                | -4.94                                | 2.22                               |
| C2                                                            | H5            | 34.65                         | -2.40395E-04                      | 31.05                                | 34.74                                | -3.69                              |
| C2                                                            | H6            | 80.84                         | -5.60847E-04                      | 74.01                                | 81.05                                | -7.04                              |
| C2                                                            | H7            | -4.93                         | 3.41684E-05                       | -2.72                                | -4.94                                | 2.22                               |
| C2                                                            | H9            | -4.93                         | 3.41684E-05                       | -2.72                                | -4.94                                | 2.22                               |
| Average for $ \Delta_{\text{int}}^{\text{A,B}} $ :            |               |                               |                                   |                                      |                                      | 3.8                                |
| Standard deviation for $ \Delta_{\text{int}}^{\text{A,B}} $ : |               |                               |                                   |                                      |                                      | 2.1                                |

  

| <b>C...H in Eclipsed</b>                                      |               | <b>CCSD/BBC1</b>              |                                   | <b>B3LYP</b>                         |                                      |                                    |
|---------------------------------------------------------------|---------------|-------------------------------|-----------------------------------|--------------------------------------|--------------------------------------|------------------------------------|
| <b>Atom A</b>                                                 | <b>Atom B</b> | $E_{\text{int}}^{\text{A,B}}$ | $E_{\text{int}}^{\text{A,B}} / E$ | Comput $E_{\text{int}}^{\text{A,B}}$ | Expect $E_{\text{int}}^{\text{A,B}}$ | $\Delta_{\text{int}}^{\text{A,B}}$ |
| C1                                                            | H5            | 82.40                         | -5.71696E-04                      | 75.84                                | 82.61                                | -6.77                              |
| C1                                                            | H6            | 37.71                         | -2.61656E-04                      | 34.34                                | 37.81                                | -3.47                              |
| C1                                                            | H8            | -6.60                         | 4.58093E-05                       | -4.41                                | -6.62                                | 2.21                               |
| C1                                                            | H10           | -6.60                         | 4.58093E-05                       | -4.41                                | -6.62                                | 2.21                               |
| C2                                                            | H5            | 37.71                         | -2.61656E-04                      | 34.31                                | 37.81                                | -3.49                              |
| C2                                                            | H6            | 82.40                         | -5.71696E-04                      | 75.84                                | 82.61                                | -6.77                              |
| C2                                                            | H7            | -6.60                         | 4.58093E-05                       | -4.41                                | -6.62                                | 2.21                               |
| C2                                                            | H9            | -6.60                         | 4.58093E-05                       | -4.41                                | -6.62                                | 2.21                               |
| Average for $ \Delta_{\text{int}}^{\text{A,B}} $ :            |               |                               |                                   |                                      |                                      | 3.7                                |
| Standard deviation for $ \Delta_{\text{int}}^{\text{A,B}} $ : |               |                               |                                   |                                      |                                      | 2.0                                |

**Table S81.** Using the CCSD/BBC1 data as a reference, analysis of relative errors  $\Delta_{cl}^{A,B}$  in the classical term  $V_{cl}^{A,B}$  of interaction energies computed at B3LYP for distant C,H atom-pairs in all conformers of glycol (values in kcal mol<sup>-1</sup>).

| <b>C...H in LEC</b>                      |               | <b>CCSD/BBC1</b> |                    | <b>B3LYP</b>          |                       |                     |
|------------------------------------------|---------------|------------------|--------------------|-----------------------|-----------------------|---------------------|
| <b>Atom A</b>                            | <b>Atom B</b> | $V_{cl}^{A,B}$   | $V_{cl}^{A,B} / E$ | Comput $V_{cl}^{A,B}$ | Expect $V_{cl}^{A,B}$ | $\Delta_{cl}^{A,B}$ |
| C1                                       | H5            | 79.50            | -5.51515E-04       | 72.50                 | 79.70                 | -7.20               |
| C1                                       | H6            | 48.29            | -3.35024E-04       | 43.15                 | 48.42                 | -5.27               |
| C1                                       | H8            | 0.12             | -8.38500E-07       | 1.72                  | 0.12                  | 1.60                |
| C1                                       | H10           | -1.10            | 7.61256E-06        | 0.70                  | -1.10                 | 1.80                |
| C2                                       | H5            | 39.11            | -2.71330E-04       | 35.15                 | 39.21                 | -4.06               |
| C2                                       | H6            | 86.47            | -5.99872E-04       | 79.29                 | 86.69                 | -7.40               |
| C2                                       | H7            | -0.83            | 5.78789E-06        | 1.07                  | -0.84                 | 1.90                |
| C2                                       | H9            | -1.27            | 8.79525E-06        | 0.50                  | -1.27                 | 1.77                |
| Average for $ \Delta_{cl}^{A,B} $        |               |                  |                    |                       |                       | 3.9                 |
| Std. deviation for $ \Delta_{cl}^{A,B} $ |               |                  |                    |                       |                       | 2.5                 |
| <hr/>                                    |               |                  |                    |                       |                       |                     |
| <b>C...H in Linear</b>                   |               | <b>CCSD/BBC1</b> |                    | <b>B3LYP</b>          |                       |                     |
| <b>Atom A</b>                            | <b>Atom B</b> | $V_{cl}^{A,B}$   | $V_{cl}^{A,B} / E$ | Comput $V_{cl}^{A,B}$ | Expect $V_{cl}^{A,B}$ | $\Delta_{cl}^{A,B}$ |
| C1                                       | H5            | 82.17            | -5.70019E-04       | 75.18                 | 82.37                 | -7.19               |
| C1                                       | H6            | 35.15            | -2.43847E-04       | 31.44                 | 35.24                 | -3.80               |
| C1                                       | H8            | -1.14            | 7.88614E-06        | 0.79                  | -1.14                 | 1.93                |
| C1                                       | H10           | -1.14            | 7.88614E-06        | 0.79                  | -1.14                 | 1.93                |
| C2                                       | H5            | 35.15            | -2.43847E-04       | 31.44                 | 35.24                 | -3.80               |
| C2                                       | H6            | 82.17            | -5.70019E-04       | 75.18                 | 82.37                 | -7.19               |
| C2                                       | H7            | -1.14            | 7.88614E-06        | 0.79                  | -1.14                 | 1.93                |
| C2                                       | H9            | -1.14            | 7.88614E-06        | 0.79                  | -1.14                 | 1.93                |
| Average for $ \Delta_{cl}^{A,B} $        |               |                  |                    |                       |                       | 3.7                 |
| Std. deviation for $ \Delta_{cl}^{A,B} $ |               |                  |                    |                       |                       | 2.3                 |
| <hr/>                                    |               |                  |                    |                       |                       |                     |
| <b>C...H in Eclipsed</b>                 |               | <b>CCSD/BBC1</b> |                    | <b>B3LYP</b>          |                       |                     |
| <b>Atom A</b>                            | <b>Atom B</b> | $V_{cl}^{A,B}$   | $V_{cl}^{A,B} / E$ | Comput $V_{cl}^{A,B}$ | Expect $V_{cl}^{A,B}$ | $\Delta_{cl}^{A,B}$ |
| C1                                       | H5            | 83.83            | -5.81584E-04       | 77.09                 | 84.04                 | -6.95               |
| C1                                       | H6            | 38.20            | -2.65018E-04       | 34.71                 | 38.30                 | -3.58               |
| C1                                       | H8            | -2.54            | 1.76089E-05        | -0.60                 | -2.54                 | 1.94                |
| C1                                       | H10           | -2.54            | 1.76089E-05        | -0.60                 | -2.54                 | 1.94                |
| C2                                       | H5            | 38.20            | -2.65018E-04       | 34.69                 | 38.30                 | -3.61               |
| C2                                       | H6            | 83.83            | -5.81584E-04       | 77.09                 | 84.04                 | -6.95               |
| C2                                       | H7            | -2.54            | 1.76089E-05        | -0.60                 | -2.54                 | 1.94                |
| C2                                       | H9            | -2.54            | 1.76089E-05        | -0.60                 | -2.54                 | 1.94                |
| Average for $ \Delta_{cl}^{A,B} $        |               |                  |                    |                       |                       | 3.6                 |
| Std. deviation for $ \Delta_{cl}^{A,B} $ |               |                  |                    |                       |                       | 2.2                 |



**Table S82.** Using the CCSD/BBC1 data as a reference, analysis of relative errors  $\Delta_{XC}^{A,B}$  in the XC-term  $V_{XC}^{A,B}$  of interaction energies computed at B3LYP for distant C,H atom-pairs in all conformers of glycol (values in kcal mol<sup>-1</sup>).

| <b>C...H in LEC</b>                      |               | <b>CCSD/BBC1</b> |                    | <b>B3LYP</b>          |                       |                     |
|------------------------------------------|---------------|------------------|--------------------|-----------------------|-----------------------|---------------------|
| <b>Atom A</b>                            | <b>Atom B</b> | $V_{XC}^{A,B}$   | $V_{XC}^{A,B} / E$ | Comput $V_{XC}^{A,B}$ | Expect $V_{XC}^{A,B}$ | $\Delta_{XC}^{A,B}$ |
| C1                                       | H5            | -1.21            | 8.40036E-06        | -1.14                 | -1.21                 | 0.07                |
| C1                                       | H6            | -0.53            | 3.70975E-06        | -0.19                 | -0.54                 | 0.35                |
| C1                                       | H8            | -4.04            | 2.80583E-05        | -4.06                 | -4.05                 | -0.01               |
| C1                                       | H10           | -3.96            | 2.74736E-05        | -3.87                 | -3.97                 | 0.10                |
| C2                                       | H5            | -0.44            | 3.07551E-06        | -0.39                 | -0.44                 | 0.06                |
| C2                                       | H6            | -1.31            | 9.10774E-06        | -1.10                 | -1.32                 | 0.22                |
| C2                                       | H7            | -3.75            | 2.59890E-05        | -3.51                 | -3.76                 | 0.24                |
| C2                                       | H9            | -3.79            | 2.63220E-05        | -3.85                 | -3.80                 | -0.04               |
| Average for $ \Delta_{XC}^{A,B} $        |               |                  |                    |                       |                       | 0.1                 |
| Std. deviation for $ \Delta_{XC}^{A,B} $ |               |                  |                    |                       |                       | 0.1                 |
| <b>C...H in Linear</b>                   |               | <b>CCSD/BBC1</b> |                    | <b>B3LYP</b>          |                       |                     |
| <b>Atom A</b>                            | <b>Atom B</b> | $V_{XC}^{A,B}$   | $V_{XC}^{A,B} / E$ | Comput $V_{XC}^{A,B}$ | Expect $V_{XC}^{A,B}$ | $\Delta_{XC}^{A,B}$ |
| C1                                       | H5            | -1.32            | 9.17191E-06        | -1.17                 | -1.33                 | 0.16                |
| C1                                       | H6            | -0.50            | 3.45234E-06        | -0.39                 | -0.50                 | 0.11                |
| C1                                       | H8            | -3.79            | 2.62822E-05        | -3.51                 | -3.80                 | 0.29                |
| C1                                       | H10           | -3.79            | 2.62822E-05        | -3.50                 | -3.80                 | 0.29                |
| C2                                       | H5            | -0.50            | 3.45234E-06        | -0.39                 | -0.50                 | 0.11                |
| C2                                       | H6            | -1.32            | 9.17191E-06        | -1.17                 | -1.33                 | 0.16                |
| C2                                       | H7            | -3.79            | 2.62822E-05        | -3.51                 | -3.80                 | 0.29                |
| C2                                       | H9            | -3.79            | 2.62822E-05        | -3.50                 | -3.80                 | 0.29                |
| Average for $ \Delta_{XC}^{A,B} $        |               |                  |                    |                       |                       | 0.2                 |
| Std. deviation for $ \Delta_{XC}^{A,B} $ |               |                  |                    |                       |                       | 0.1                 |
| <b>C...H in Eclipsed</b>                 |               | <b>CCSD/BBC1</b> |                    | <b>B3LYP</b>          |                       |                     |
| <b>Atom A</b>                            | <b>Atom B</b> | $V_{XC}^{A,B}$   | $V_{XC}^{A,B} / E$ | Comput $V_{XC}^{A,B}$ | Expect $V_{XC}^{A,B}$ | $\Delta_{XC}^{A,B}$ |
| C1                                       | H5            | -1.43            | 9.88825E-06        | -1.25                 | -1.43                 | 0.18                |
| C1                                       | H6            | -0.48            | 3.36254E-06        | -0.37                 | -0.49                 | 0.11                |
| C1                                       | H8            | -4.06            | 2.82004E-05        | -3.81                 | -4.07                 | 0.27                |
| C1                                       | H10           | -4.06            | 2.82004E-05        | -3.81                 | -4.07                 | 0.27                |
| C2                                       | H5            | -0.48            | 3.36254E-06        | -0.37                 | -0.49                 | 0.11                |
| C2                                       | H6            | -1.43            | 9.88825E-06        | -1.25                 | -1.43                 | 0.18                |
| C2                                       | H7            | -4.06            | 2.82004E-05        | -3.81                 | -4.07                 | 0.27                |
| C2                                       | H9            | -4.06            | 2.82004E-05        | -3.81                 | -4.07                 | 0.27                |
| Average for $ \Delta_{XC}^{A,B} $        |               |                  |                    |                       |                       | 0.2                 |
| Std. deviation for $ \Delta_{XC}^{A,B} $ |               |                  |                    |                       |                       | 0.1                 |

**Table S83.** Using the CCSD/BBC1 data as a reference, analysis of relative errors  $\Delta_{\text{int}}^{\text{A,B}}$  in interaction energies  $E_{\text{int}}^{\text{A,B}}$  computed at B3LYP for distant O,H atom-pairs in all conformers of glycol (values in kcal mol<sup>-1</sup>).

| O...H in LEC                                            |        | CCSD/BBC1                     |                                   | B3LYP                                |                                      |                                    |
|---------------------------------------------------------|--------|-------------------------------|-----------------------------------|--------------------------------------|--------------------------------------|------------------------------------|
| Atom A                                                  | Atom B | $E_{\text{int}}^{\text{A,B}}$ | $E_{\text{int}}^{\text{A,B}} / E$ | Comput $E_{\text{int}}^{\text{A,B}}$ | Expect $E_{\text{int}}^{\text{A,B}}$ | $\Delta_{\text{int}}^{\text{A,B}}$ |
| O3                                                      | H5     | -63.47                        | 4.40340E-04                       | -60.75                               | -63.63                               | 2.89                               |
| O3                                                      | H7     | 1.53                          | -1.05919E-05                      | -0.68                                | 1.53                                 | -2.21                              |
| O3                                                      | H8     | -6.44                         | 4.46864E-05                       | -10.36                               | -6.46                                | -3.90                              |
| O3                                                      | H9     | 1.74                          | -1.20837E-05                      | -0.24                                | 1.75                                 | -1.98                              |
| O3                                                      | H10    | -4.72                         | 3.27422E-05                       | -8.94                                | -4.73                                | -4.21                              |
| O4                                                      | H6     | -90.89                        | 6.30517E-04                       | -86.09                               | -91.12                               | 5.03                               |
| O4                                                      | H7     | -4.46                         | 3.09496E-05                       | -8.63                                | -4.47                                | -4.16                              |
| O4                                                      | H8     | 0.02                          | -1.51058E-07                      | -2.06                                | 0.02                                 | -2.08                              |
| O4                                                      | H9     | -3.22                         | 2.23074E-05                       | -7.25                                | -3.22                                | -4.02                              |
| O4                                                      | H10    | 1.98                          | -1.37476E-05                      | -0.31                                | 1.99                                 | -2.29                              |
| Average for $ \Delta_{\text{int}}^{\text{A,B}} $        |        |                               |                                   |                                      |                                      | 3.3                                |
| Std. deviation for $ \Delta_{\text{int}}^{\text{A,B}} $ |        |                               |                                   |                                      |                                      | 1.1                                |

| O...H in Linear                                         |        | CCSD/BBC1                     |                                   | B3LYP                                |                                      |                                    |
|---------------------------------------------------------|--------|-------------------------------|-----------------------------------|--------------------------------------|--------------------------------------|------------------------------------|
| Atom A                                                  | Atom B | $E_{\text{int}}^{\text{A,B}}$ | $E_{\text{int}}^{\text{A,B}} / E$ | Comput $E_{\text{int}}^{\text{A,B}}$ | Expect $E_{\text{int}}^{\text{A,B}}$ | $\Delta_{\text{int}}^{\text{A,B}}$ |
| O3                                                      | H5     | -50.37                        | 3.49449E-04                       | -48.35                               | -50.50                               | 2.15                               |
| O3                                                      | H7     | 2.11                          | -1.46101E-05                      | -0.09                                | 2.11                                 | -2.20                              |
| O3                                                      | H8     | -3.97                         | 2.75121E-05                       | -8.26                                | -3.98                                | -4.28                              |
| O3                                                      | H9     | 2.11                          | -1.46101E-05                      | -0.09                                | 2.11                                 | -2.20                              |
| O3                                                      | H10    | -3.97                         | 2.75121E-05                       | -8.26                                | -3.98                                | -4.28                              |
| O4                                                      | H6     | -50.37                        | 3.49449E-04                       | -48.35                               | -50.50                               | 2.15                               |
| O4                                                      | H7     | -3.97                         | 2.75121E-05                       | -8.26                                | -3.98                                | -4.28                              |
| O4                                                      | H8     | 2.11                          | -1.46101E-05                      | -0.09                                | 2.11                                 | -2.20                              |
| O4                                                      | H9     | -3.97                         | 2.75121E-05                       | -8.26                                | -3.98                                | -4.28                              |
| O4                                                      | H10    | 2.11                          | -1.46101E-05                      | -0.09                                | 2.11                                 | -2.20                              |
| Average for $ \Delta_{\text{int}}^{\text{A,B}} $        |        |                               |                                   |                                      |                                      | 3.0                                |
| Std. deviation for $ \Delta_{\text{int}}^{\text{A,B}} $ |        |                               |                                   |                                      |                                      | 1.1                                |

| O...H in Eclipsed                                       |        | CCSD/BBC1                     |                                   | B3LYP                                |                                      |                                    |
|---------------------------------------------------------|--------|-------------------------------|-----------------------------------|--------------------------------------|--------------------------------------|------------------------------------|
| Atom A                                                  | Atom B | $E_{\text{int}}^{\text{A,B}}$ | $E_{\text{int}}^{\text{A,B}} / E$ | Comput $E_{\text{int}}^{\text{A,B}}$ | Expect $E_{\text{int}}^{\text{A,B}}$ | $\Delta_{\text{int}}^{\text{A,B}}$ |
| O3                                                      | H5     | -59.43                        | 4.12334E-04                       | -57.22                               | -59.58                               | 2.36                               |
| O3                                                      | H7     | 3.69                          | -2.56299E-05                      | 1.90                                 | 3.70                                 | -1.81                              |
| O3                                                      | H8     | -1.45                         | 1.00861E-05                       | -5.81                                | -1.46                                | -4.35                              |
| O3                                                      | H9     | 3.69                          | -2.56299E-05                      | 1.90                                 | 3.70                                 | -1.81                              |
| O3                                                      | H10    | -1.45                         | 1.00861E-05                       | -5.81                                | -1.46                                | -4.35                              |
| O4                                                      | H6     | -59.43                        | 4.12334E-04                       | -57.22                               | -59.58                               | 2.36                               |
| O4                                                      | H7     | -1.45                         | 1.00861E-05                       | -5.81                                | -1.46                                | -4.35                              |
| O4                                                      | H8     | 3.69                          | -2.56299E-05                      | 1.90                                 | 3.70                                 | -1.81                              |
| O4                                                      | H9     | -1.45                         | 1.00861E-05                       | -5.81                                | -1.46                                | -4.35                              |
| O4                                                      | H10    | 3.69                          | -2.56299E-05                      | 1.90                                 | 3.70                                 | -1.81                              |
| Average for $ \Delta_{\text{int}}^{\text{A,B}} $        |        |                               |                                   |                                      |                                      | 2.9                                |
| Std. deviation for $ \Delta_{\text{int}}^{\text{A,B}} $ |        |                               |                                   |                                      |                                      | 1.2                                |

**Table S84.** Using the CCSD/BBC1 data as a reference, analysis of relative errors  $\Delta_{\text{cl}}^{\text{A,B}}$  in the classical term  $V_{\text{cl}}^{\text{A,B}}$  of the interaction energies computed at B3LYP for distant O,H atom-pairs in all conformers of glycol (values in kcal mol<sup>-1</sup>).

| O...H in LEC                                           |        | CCSD/BBC1                    |                                  | B3LYP                               |                                     |                                   |
|--------------------------------------------------------|--------|------------------------------|----------------------------------|-------------------------------------|-------------------------------------|-----------------------------------|
| Atom A                                                 | Atom B | $V_{\text{cl}}^{\text{A,B}}$ | $V_{\text{cl}}^{\text{A,B}} / E$ | Comput $V_{\text{cl}}^{\text{A,B}}$ | Expect $V_{\text{cl}}^{\text{A,B}}$ | $\Delta_{\text{cl}}^{\text{A,B}}$ |
| O3                                                     | H5     | 79.50                        | -5.51515E-04                     | 72.50                               | 79.70                               | -7.20                             |
| O3                                                     | H7     | 48.29                        | -3.35024E-04                     | 43.15                               | 48.42                               | -5.27                             |
| O3                                                     | H8     | 0.12                         | -8.38500E-07                     | 1.72                                | 0.12                                | 1.60                              |
| O3                                                     | H9     | -1.10                        | 7.61256E-06                      | 0.70                                | -1.10                               | 1.80                              |
| O3                                                     | H10    | 39.11                        | -2.71330E-04                     | 35.15                               | 39.21                               | -4.06                             |
| O4                                                     | H6     | 86.47                        | -5.99872E-04                     | 79.29                               | 86.69                               | -7.40                             |
| O4                                                     | H7     | -0.83                        | 5.78789E-06                      | 1.07                                | -0.84                               | 1.90                              |
| O4                                                     | H8     | -1.27                        | 8.79525E-06                      | 0.50                                | -1.27                               | 1.77                              |
| O4                                                     | H9     | 79.50                        | -5.51515E-04                     | 72.50                               | 79.70                               | -7.20                             |
| O4                                                     | H10    | 48.29                        | -3.35024E-04                     | 43.15                               | 48.42                               | -5.27                             |
| Average for $ \Delta_{\text{cl}}^{\text{A,B}} $        |        |                              |                                  |                                     |                                     | 3.9                               |
| Std. deviation for $ \Delta_{\text{cl}}^{\text{A,B}} $ |        |                              |                                  |                                     |                                     | 2.5                               |

| <b>O...H in Linear</b>                   |               | <b>CCSD/BBC1</b> |                    | <b>B3LYP</b>          |                       |                     |
|------------------------------------------|---------------|------------------|--------------------|-----------------------|-----------------------|---------------------|
| <b>Atom A</b>                            | <b>Atom B</b> | $V_{cl}^{A,B}$   | $V_{cl}^{A,B} / E$ | Comput $V_{cl}^{A,B}$ | Expect $V_{cl}^{A,B}$ | $\Delta_{cl}^{A,B}$ |
| O3                                       | H5            | -49.87           | 3.45955E-04        | -48.28                | -49.99                | 1.71                |
| O3                                       | H7            | 4.07             | -2.82240E-05       | 1.36                  | 4.08                  | -2.72               |
| O3                                       | H8            | 2.14             | -1.48185E-05       | -1.41                 | 2.14                  | -3.56               |
| O3                                       | H9            | 4.07             | -2.82240E-05       | 1.36                  | 4.08                  | -2.72               |
| O3                                       | H10           | 2.14             | -1.48185E-05       | -1.41                 | 2.14                  | -3.56               |
| O4                                       | H6            | -49.87           | 3.45955E-04        | -48.28                | -49.99                | 1.71                |
| O4                                       | H7            | 2.14             | -1.48185E-05       | -1.41                 | 2.14                  | -3.56               |
| O4                                       | H8            | 4.07             | -2.82240E-05       | 1.36                  | 4.08                  | -2.72               |
| O4                                       | H9            | 2.14             | -1.48185E-05       | -1.41                 | 2.14                  | -3.56               |
| O4                                       | H10           | 4.07             | -2.82240E-05       | 1.36                  | 4.08                  | -2.72               |
| Average for $ \Delta_{cl}^{A,B} $        |               |                  |                    |                       |                       | 2.9                 |
| Std. deviation for $ \Delta_{cl}^{A,B} $ |               |                  |                    |                       |                       | 0.7                 |

| <b>O...H in Eclipsed</b>                 |               | <b>CCSD/BBC1</b> |                    | <b>B3LYP</b>          |                       |                     |
|------------------------------------------|---------------|------------------|--------------------|-----------------------|-----------------------|---------------------|
| <b>Atom A</b>                            | <b>Atom B</b> | $V_{cl}^{A,B}$   | $V_{cl}^{A,B} / E$ | Comput $V_{cl}^{A,B}$ | Expect $V_{cl}^{A,B}$ | $\Delta_{cl}^{A,B}$ |
| O3                                       | H5            | 83.83            | -5.81584E-04       | 77.09                 | 84.04                 | -6.95               |
| O3                                       | H7            | 38.20            | -2.65018E-04       | 34.71                 | 38.30                 | -3.58               |
| O3                                       | H8            | -2.54            | 1.76089E-05        | -0.60                 | -2.54                 | 1.94                |
| O3                                       | H9            | -2.54            | 1.76089E-05        | -0.60                 | -2.54                 | 1.94                |
| O3                                       | H10           | 38.20            | -2.65018E-04       | 34.69                 | 38.30                 | -3.61               |
| O4                                       | H6            | 83.83            | -5.81584E-04       | 77.09                 | 84.04                 | -6.95               |
| O4                                       | H7            | -2.54            | 1.76089E-05        | -0.60                 | -2.54                 | 1.94                |
| O4                                       | H8            | -2.54            | 1.76089E-05        | -0.60                 | -2.54                 | 1.94                |
| O4                                       | H9            | 83.83            | -5.81584E-04       | 77.09                 | 84.04                 | -6.95               |
| O4                                       | H10           | 38.20            | -2.65018E-04       | 34.71                 | 38.30                 | -3.58               |
| Average for $ \Delta_{cl}^{A,B} $        |               |                  |                    |                       |                       | 3.6                 |
| Std. deviation for $ \Delta_{cl}^{A,B} $ |               |                  |                    |                       |                       | 2.2                 |

**Table S85.** Using the CCSD/BBC1 data as a reference, analysis of relative errors  $\Delta_{XC}^{A,B}$  in the XC-term  $V_{XC}^{A,B}$  of the interaction energies computed at B3LYP for distant O...H atom-pairs in all conformers of glycol (values in kcal mol<sup>-1</sup>).

| O...H in LEC                             |        | CCSD/BBC1      |                    | B3LYP                 |                       |                     |
|------------------------------------------|--------|----------------|--------------------|-----------------------|-----------------------|---------------------|
| Atom A                                   | Atom B | $V_{XC}^{A,B}$ | $V_{XC}^{A,B} / E$ | Comput $V_{XC}^{A,B}$ | Expect $V_{XC}^{A,B}$ | $\Delta_{XC}^{A,B}$ |
| O3                                       | H5     | -0.35          | 2.44852E-06        | -0.06                 | -0.35                 | 0.30                |
| O3                                       | H7     | -2.00          | 1.38900E-05        | -1.44                 | -2.01                 | 0.57                |
| O3                                       | H8     | -6.27          | 4.34686E-05        | -6.63                 | -6.28                 | -0.34               |
| O3                                       | H9     | -1.14          | 7.90820E-06        | -0.83                 | -1.14                 | 0.31                |
| O3                                       | H10    | -6.42          | 4.45528E-05        | -7.01                 | -6.44                 | -0.57               |
| O4                                       | H6     | -3.03          | 2.10430E-05        | -2.26                 | -3.04                 | 0.78                |
| O4                                       | H7     | -6.28          | 4.35390E-05        | -6.93                 | -6.29                 | -0.64               |
| O4                                       | H8     | -0.86          | 5.98068E-06        | -0.69                 | -0.86                 | 0.18                |
| O4                                       | H9     | -6.50          | 4.51269E-05        | -6.91                 | -6.52                 | -0.39               |
| O4                                       | H10    | -1.99          | 1.38080E-05        | -1.44                 | -2.00                 | 0.56                |
| Average for $ \Delta_{XC}^{A,B} $        |        |                |                    |                       |                       | 0.5                 |
| Std. deviation for $ \Delta_{XC}^{A,B} $ |        |                |                    |                       |                       | 0.2                 |

| O...H in Linear                          |        | CCSD/BBC1      |                    | B3LYP                 |                       |                     |
|------------------------------------------|--------|----------------|--------------------|-----------------------|-----------------------|---------------------|
| Atom A                                   | Atom B | $V_{XC}^{A,B}$ | $V_{XC}^{A,B} / E$ | Comput $V_{XC}^{A,B}$ | Expect $V_{XC}^{A,B}$ | $\Delta_{XC}^{A,B}$ |
| O3                                       | H5     | -0.50          | 3.49384E-06        | -0.07                 | -0.50                 | 0.44                |
| O3                                       | H7     | -1.96          | 1.36138E-05        | -1.45                 | -1.97                 | 0.52                |
| O3                                       | H8     | -6.10          | 4.23306E-05        | -6.84                 | -6.12                 | -0.72               |
| O3                                       | H9     | -1.96          | 1.36138E-05        | -1.45                 | -1.97                 | 0.52                |
| O3                                       | H10    | -6.10          | 4.23306E-05        | -6.84                 | -6.12                 | -0.72               |
| O4                                       | H6     | -0.50          | 3.49384E-06        | -0.07                 | -0.50                 | 0.44                |
| O4                                       | H7     | -6.10          | 4.23306E-05        | -6.84                 | -6.12                 | -0.72               |
| O4                                       | H8     | -1.96          | 1.36138E-05        | -1.45                 | -1.97                 | 0.52                |
| O4                                       | H9     | -6.10          | 4.23306E-05        | -6.84                 | -6.12                 | -0.72               |
| O4                                       | H10    | -1.96          | 1.36138E-05        | -1.45                 | -1.97                 | 0.52                |
| Average for $ \Delta_{XC}^{A,B} $        |        |                |                    |                       |                       | 0.6                 |
| Std. deviation for $ \Delta_{XC}^{A,B} $ |        |                |                    |                       |                       | 0.1                 |



| O...H in Eclipsed                        |        | CCSD/BBC1      |                    | B3LYP                 |                       |                     |
|------------------------------------------|--------|----------------|--------------------|-----------------------|-----------------------|---------------------|
| Atom A                                   | Atom B | $V_{XC}^{A,B}$ | $V_{XC}^{A,B} / E$ | Comput $V_{XC}^{A,B}$ | Expect $V_{XC}^{A,B}$ | $\Delta_{XC}^{A,B}$ |
| O3                                       | H5     | -0.67          | 4.62679E-06        | -0.15                 | -0.67                 | 0.52                |
| O3                                       | H7     | -0.70          | 4.84171E-06        | -0.28                 | -0.70                 | 0.42                |
| O3                                       | H8     | -6.58          | 4.56687E-05        | -7.39                 | -6.60                 | -0.79               |
| O3                                       | H9     | -0.70          | 4.84171E-06        | -0.28                 | -0.70                 | 0.42                |
| O3                                       | H10    | -6.58          | 4.56687E-05        | -7.39                 | -6.60                 | -0.80               |
| O4                                       | H6     | -0.67          | 4.62679E-06        | -0.15                 | -0.67                 | 0.52                |
| O4                                       | H7     | -6.58          | 4.56687E-05        | -7.39                 | -6.60                 | -0.80               |
| O4                                       | H8     | -0.70          | 4.84171E-06        | -0.28                 | -0.70                 | 0.42                |
| O4                                       | H9     | -6.58          | 4.56687E-05        | -7.39                 | -6.60                 | -0.80               |
| O4                                       | H10    | -0.70          | 4.84171E-06        | -0.28                 | -0.70                 | 0.42                |
| Average for $ \Delta_{XC}^{A,B} $        |        |                |                    |                       |                       | 0.6                 |
| Std. deviation for $ \Delta_{XC}^{A,B} $ |        |                |                    |                       |                       | 0.2                 |

**Table S86.** Using the CCSD/BBC1 data as a reference, analysis of relative errors  $\Delta_{int}^{A,B}$  in interaction energies  $E_{int}^{A,B}$  computed at B3LYP for distant H,H atom-pairs in all conformers of glycol (values in kcal mol<sup>-1</sup>).

| H...H in LEC                              |        | CCSD/BBC1       |                     | B3LYP                  |                        |                      |
|-------------------------------------------|--------|-----------------|---------------------|------------------------|------------------------|----------------------|
| Atom A                                    | Atom B | $E_{int}^{A,B}$ | $E_{int}^{A,B} / E$ | Comput $E_{int}^{A,B}$ | Expect $E_{int}^{A,B}$ | $\Delta_{int}^{A,B}$ |
| H5                                        | H6     | 36.97           | -2.56444E-04        | 35.99                  | 37.06                  | -1.06                |
| H5                                        | H7     | -1.91           | 1.32190E-05         | -0.07                  | -1.91                  | 1.84                 |
| H5                                        | H8     | -0.65           | 4.54108E-06         | 0.37                   | -0.66                  | 1.02                 |
| H5                                        | H9     | -2.20           | 1.52426E-05         | -0.48                  | -2.20                  | 1.72                 |
| H5                                        | H10    | -1.79           | 1.23902E-05         | -0.58                  | -1.79                  | 1.21                 |
| H6                                        | H7     | -1.78           | 1.23769E-05         | -0.30                  | -1.79                  | 1.49                 |
| H6                                        | H8     | -0.43           | 2.95773E-06         | 1.06                   | -0.43                  | 1.49                 |
| H6                                        | H9     | -1.50           | 1.03754E-05         | -0.29                  | -1.50                  | 1.21                 |
| H6                                        | H10    | -1.52           | 1.05510E-05         | 0.34                   | -1.52                  | 1.86                 |
| H7                                        | H8     | -0.42           | 2.91928E-06         | -0.17                  | -0.42                  | 0.25                 |
| H7                                        | H9     | -2.32           | 1.60696E-05         | -2.49                  | -2.32                  | -0.17                |
| H7                                        | H10    | -0.55           | 3.79630E-06         | -0.51                  | -0.55                  | 0.04                 |
| H8                                        | H9     | -0.32           | 2.23740E-06         | -0.20                  | -0.32                  | 0.13                 |
| H8                                        | H10    | -2.38           | 1.65337E-05         | -2.42                  | -2.39                  | -0.03                |
| H9                                        | H10    | -0.25           | 1.74888E-06         | -0.18                  | -0.25                  | 0.07                 |
| Average for $ \Delta_{int}^{A,B} $        |        |                 |                     |                        |                        | 0.9                  |
| Std. deviation for $ \Delta_{int}^{A,B} $ |        |                 |                     |                        |                        | 0.7                  |

| <b>H...H in Linear</b>                                  |               | <b>CCSD/BBC1</b>              |                                   | <b>B3LYP</b>                         |                                      |                                    |
|---------------------------------------------------------|---------------|-------------------------------|-----------------------------------|--------------------------------------|--------------------------------------|------------------------------------|
| <b>Atom A</b>                                           | <b>Atom B</b> | $E_{\text{int}}^{\text{A,B}}$ | $E_{\text{int}}^{\text{A,B}} / E$ | Comput $E_{\text{int}}^{\text{A,B}}$ | Expect $E_{\text{int}}^{\text{A,B}}$ | $\Delta_{\text{int}}^{\text{A,B}}$ |
| H5                                                      | H6            | 22.72                         | -1.57635E-04                      | 22.58                                | 22.78                                | -0.20                              |
| H5                                                      | H7            | -1.84                         | 1.27666E-05                       | -0.08                                | -1.84                                | 1.76                               |
| H5                                                      | H8            | -1.82                         | 1.25965E-05                       | -0.65                                | -1.82                                | 1.17                               |
| H5                                                      | H9            | -1.84                         | 1.27666E-05                       | -0.08                                | -1.84                                | 1.76                               |
| H5                                                      | H10           | -1.82                         | 1.25965E-05                       | -0.65                                | -1.82                                | 1.17                               |
| H6                                                      | H7            | -1.82                         | 1.25965E-05                       | -0.65                                | -1.82                                | 1.17                               |
| H6                                                      | H8            | -1.84                         | 1.27666E-05                       | -0.08                                | -1.84                                | 1.76                               |
| H6                                                      | H9            | -1.82                         | 1.25965E-05                       | -0.65                                | -1.82                                | 1.17                               |
| H6                                                      | H10           | -1.84                         | 1.27666E-05                       | -0.08                                | -1.84                                | 1.76                               |
| H7                                                      | H8            | -0.57                         | 3.92163E-06                       | -0.48                                | -0.57                                | 0.09                               |
| H7                                                      | H9            | -2.51                         | 1.73979E-05                       | -2.53                                | -2.51                                | -0.02                              |
| H7                                                      | H10           | -0.46                         | 3.19134E-06                       | -0.20                                | -0.46                                | 0.26                               |
| H8                                                      | H9            | -0.46                         | 3.19134E-06                       | -0.20                                | -0.46                                | 0.26                               |
| H8                                                      | H10           | -2.51                         | 1.73979E-05                       | -2.53                                | -2.51                                | -0.02                              |
| H9                                                      | H10           | -0.57                         | 3.92163E-06                       | -0.48                                | -0.57                                | 0.09                               |
| Average for $ \Delta_{\text{int}}^{\text{A,B}} $        |               |                               |                                   |                                      |                                      | 0.8                                |
| Std. deviation for $ \Delta_{\text{int}}^{\text{A,B}} $ |               |                               |                                   |                                      |                                      | 0.7                                |

| <b>H...H in Eclipsed</b>                                |               | <b>CCSD/BBC1</b>              |                                   | <b>B3LYP</b>                         |                                      |                                    |
|---------------------------------------------------------|---------------|-------------------------------|-----------------------------------|--------------------------------------|--------------------------------------|------------------------------------|
| <b>Atom A</b>                                           | <b>Atom B</b> | $E_{\text{int}}^{\text{A,B}}$ | $E_{\text{int}}^{\text{A,B}} / E$ | Comput $E_{\text{int}}^{\text{A,B}}$ | Expect $E_{\text{int}}^{\text{A,B}}$ | $\Delta_{\text{int}}^{\text{A,B}}$ |
| H5                                                      | H6            | 25.93                         | -1.79929E-04                      | 25.84                                | 26.00                                | -0.16                              |
| H5                                                      | H7            | -3.37                         | 2.33517E-05                       | -1.59                                | -3.37                                | 1.79                               |
| H5                                                      | H8            | -2.23                         | 1.54635E-05                       | -1.21                                | -2.23                                | 1.02                               |
| H5                                                      | H9            | -3.37                         | 2.33517E-05                       | -1.59                                | -3.37                                | 1.79                               |
| H5                                                      | H10           | -2.23                         | 1.54635E-05                       | -1.21                                | -2.23                                | 1.02                               |
| H6                                                      | H7            | -2.23                         | 1.54635E-05                       | -1.21                                | -2.23                                | 1.02                               |
| H6                                                      | H8            | -3.37                         | 2.33517E-05                       | -1.59                                | -3.37                                | 1.79                               |
| H6                                                      | H9            | -2.23                         | 1.54635E-05                       | -1.21                                | -2.23                                | 1.02                               |
| H6                                                      | H10           | -3.37                         | 2.33517E-05                       | -1.59                                | -3.37                                | 1.79                               |
| H7                                                      | H8            | -0.88                         | 6.13093E-06                       | -0.70                                | -0.89                                | 0.18                               |
| H7                                                      | H9            | -2.65                         | 1.83821E-05                       | -2.84                                | -2.66                                | -0.18                              |
| H7                                                      | H10           | -0.25                         | 1.76286E-06                       | -0.14                                | -0.25                                | 0.12                               |
| H8                                                      | H9            | -0.25                         | 1.76286E-06                       | -0.14                                | -0.25                                | 0.12                               |
| H8                                                      | H10           | -2.65                         | 1.83821E-05                       | -2.84                                | -2.66                                | -0.18                              |
| H9                                                      | H10           | -0.88                         | 6.13093E-06                       | -0.70                                | -0.89                                | 0.18                               |
| Average for $ \Delta_{\text{int}}^{\text{A,B}} $        |               |                               |                                   |                                      |                                      | 0.8                                |
| Std. deviation for $ \Delta_{\text{int}}^{\text{A,B}} $ |               |                               |                                   |                                      |                                      | 0.7                                |

**Table S87.** Using the CCSD/BBC1 data as a reference, analysis of relative errors  $\Delta_{cl}^{A,B}$  in the classical term  $V_{cl}^{A,B}$  of interaction energies computed at B3LYP for distant H,H atom-pairs in all conformers of glycol (values in kcal mol<sup>-1</sup>).

| <b>H...H in LEC</b>                      |               | <b>CCSD/BBC1</b> |                    | <b>B3LYP</b>          |                       |                     |
|------------------------------------------|---------------|------------------|--------------------|-----------------------|-----------------------|---------------------|
| <b>Atom A</b>                            | <b>Atom B</b> | $V_{cl}^{A,B}$   | $V_{cl}^{A,B} / E$ | Comput $V_{cl}^{A,B}$ | Expect $V_{cl}^{A,B}$ | $\Delta_{cl}^{A,B}$ |
| H5                                       | H6            | 37.09            | -2.57280E-04       | 36.03                 | 37.18                 | -1.15               |
| H5                                       | H7            | -1.73            | 1.19752E-05        | 0.06                  | -1.73                 | 1.79                |
| H5                                       | H8            | -0.59            | 4.11552E-06        | 0.44                  | -0.59                 | 1.03                |
| H5                                       | H9            | -2.11            | 1.46141E-05        | -0.42                 | -2.11                 | 1.69                |
| H5                                       | H10           | -1.71            | 1.18685E-05        | -0.55                 | -1.72                 | 1.16                |
| H6                                       | H7            | -1.70            | 1.17605E-05        | -0.29                 | -1.70                 | 1.41                |
| H6                                       | H8            | -0.08            | 5.40273E-07        | 1.46                  | -0.08                 | 1.54                |
| H6                                       | H9            | -1.41            | 9.76436E-06        | -0.27                 | -1.41                 | 1.14                |
| H6                                       | H10           | -1.38            | 9.58579E-06        | 0.41                  | -1.39                 | 1.79                |
| H7                                       | H8            | 0.20             | -1.38967E-06       | 0.16                  | 0.20                  | -0.04               |
| H7                                       | H9            | 0.69             | -4.78518E-06       | 0.73                  | 0.69                  | 0.04                |
| H7                                       | H10           | 0.08             | -5.50299E-07       | 0.06                  | 0.08                  | -0.02               |
| H8                                       | H9            | 0.26             | -1.82468E-06       | 0.18                  | 0.26                  | -0.09               |
| H8                                       | H10           | 0.67             | -4.65740E-06       | 0.79                  | 0.67                  | 0.11                |
| H9                                       | H10           | 0.30             | -2.06546E-06       | 0.18                  | 0.30                  | -0.11               |
| Average for $ \Delta_{cl}^{A,B} $        |               |                  |                    |                       |                       | 0.9                 |
| Std. deviation for $ \Delta_{cl}^{A,B} $ |               |                  |                    |                       |                       | 0.7                 |

  

| <b>H...H in Linear</b>                   |               | <b>CCSD/BBC1</b> |                    | <b>B3LYP</b>          |                       |                     |
|------------------------------------------|---------------|------------------|--------------------|-----------------------|-----------------------|---------------------|
| <b>Atom A</b>                            | <b>Atom B</b> | $V_{cl}^{A,B}$   | $V_{cl}^{A,B} / E$ | Comput $V_{cl}^{A,B}$ | Expect $V_{cl}^{A,B}$ | $\Delta_{cl}^{A,B}$ |
| H5                                       | H6            | 22.91            | -1.58934E-04       | 22.59                 | 22.97                 | -0.38               |
| H5                                       | H7            | -1.74            | 1.20370E-05        | 0.01                  | -1.74                 | 1.75                |
| H5                                       | H8            | -1.78            | 1.23721E-05        | -0.63                 | -1.79                 | 1.16                |
| H5                                       | H9            | -1.74            | 1.20370E-05        | 0.01                  | -1.74                 | 1.75                |
| H5                                       | H10           | -1.78            | 1.23721E-05        | -0.63                 | -1.79                 | 1.16                |
| H6                                       | H7            | -1.78            | 1.23721E-05        | -0.63                 | -1.79                 | 1.16                |
| H6                                       | H8            | -1.74            | 1.20370E-05        | 0.01                  | -1.74                 | 1.75                |
| H6                                       | H9            | -1.78            | 1.23721E-05        | -0.63                 | -1.79                 | 1.16                |
| H6                                       | H10           | -1.74            | 1.20370E-05        | 0.01                  | -1.74                 | 1.75                |
| H7                                       | H8            | 0.08             | -5.35901E-07       | 0.06                  | 0.08                  | -0.02               |
| H7                                       | H9            | 0.67             | -4.65362E-06       | 0.75                  | 0.67                  | 0.07                |
| H7                                       | H10           | 0.21             | -1.46599E-06       | 0.15                  | 0.21                  | -0.06               |
| H8                                       | H9            | 0.21             | -1.46599E-06       | 0.15                  | 0.21                  | -0.06               |
| H8                                       | H10           | 0.67             | -4.65362E-06       | 0.75                  | 0.67                  | 0.07                |
| H9                                       | H10           | 0.08             | -5.35901E-07       | 0.06                  | 0.08                  | -0.02               |
| Average for $ \Delta_{cl}^{A,B} $        |               |                  |                    |                       |                       | 0.8                 |
| Std. deviation for $ \Delta_{cl}^{A,B} $ |               |                  |                    |                       |                       | 0.7                 |



| H...H in Eclipsed                        |        | CCSD/BBC1      |                    | B3LYP                 |                       |                     |
|------------------------------------------|--------|----------------|--------------------|-----------------------|-----------------------|---------------------|
| Atom A                                   | Atom B | $V_{cl}^{A,B}$ | $V_{cl}^{A,B} / E$ | Comput $V_{cl}^{A,B}$ | Expect $V_{cl}^{A,B}$ | $\Delta_{cl}^{A,B}$ |
| H5                                       | H6     | 26.14          | -1.81338E-04       | 25.84                 | 26.20                 | -0.36               |
| H5                                       | H7     | -3.23          | 2.23898E-05        | -1.47                 | -3.24                 | 1.76                |
| H5                                       | H8     | -2.19          | 1.52172E-05        | -1.19                 | -2.20                 | 1.01                |
| H5                                       | H9     | -3.23          | 2.23898E-05        | -1.47                 | -3.24                 | 1.76                |
| H5                                       | H10    | -2.19          | 1.52172E-05        | -1.19                 | -2.20                 | 1.01                |
| H6                                       | H7     | -2.19          | 1.52172E-05        | -1.19                 | -2.20                 | 1.01                |
| H6                                       | H8     | -3.23          | 2.23898E-05        | -1.47                 | -3.24                 | 1.76                |
| H6                                       | H9     | -2.19          | 1.52172E-05        | -1.19                 | -2.20                 | 1.01                |
| H6                                       | H10    | -3.23          | 2.23898E-05        | -1.47                 | -3.24                 | 1.76                |
| H7                                       | H8     | 0.58           | -3.99386E-06       | 0.37                  | 0.58                  | -0.21               |
| H7                                       | H9     | 0.80           | -5.52134E-06       | 0.72                  | 0.80                  | -0.08               |
| H7                                       | H10    | 0.25           | -1.76849E-06       | 0.13                  | 0.26                  | -0.13               |
| H8                                       | H9     | 0.25           | -1.76849E-06       | 0.13                  | 0.26                  | -0.13               |
| H8                                       | H10    | 0.80           | -5.52134E-06       | 0.72                  | 0.80                  | -0.08               |
| H9                                       | H10    | 0.58           | -3.99386E-06       | 0.37                  | 0.58                  | -0.21               |
| Average for $ \Delta_{cl}^{A,B} $        |        |                |                    |                       |                       | 0.8                 |
| Std. deviation for $ \Delta_{cl}^{A,B} $ |        |                |                    |                       |                       | 0.7                 |

**Table S88.** Using the CCSD/BBC1 data as a reference, analysis of relative errors  $\Delta_{XC}^{A,B}$  in the XC-term  $V_{XC}^{A,B}$  of interaction energies, computed at B3LYP for distant H,H atom-pairs in all conformers of glycol (values in kcal mol<sup>-1</sup>).

| H...H in LEC                             |        | CCSD/BBC1      |                    | B3LYP                 |                       |                     |
|------------------------------------------|--------|----------------|--------------------|-----------------------|-----------------------|---------------------|
| Atom A                                   | Atom B | $V_{XC}^{A,B}$ | $V_{XC}^{A,B} / E$ | Comput $V_{XC}^{A,B}$ | Expect $V_{XC}^{A,B}$ | $\Delta_{XC}^{A,B}$ |
| H5                                       | H6     | -0.12          | 8.35982E-07        | -0.03                 | -0.12                 | 0.09                |
| H5                                       | H7     | -0.18          | 1.24377E-06        | -0.13                 | -0.18                 | 0.05                |
| H5                                       | H8     | -0.06          | 4.25557E-07        | -0.07                 | -0.06                 | -0.01               |
| H5                                       | H9     | -0.09          | 6.28456E-07        | -0.06                 | -0.09                 | 0.03                |
| H5                                       | H10    | -0.08          | 5.21707E-07        | -0.03                 | -0.08                 | 0.05                |
| H6                                       | H7     | -0.09          | 6.16356E-07        | -0.01                 | -0.09                 | 0.08                |
| H6                                       | H8     | -0.35          | 2.41746E-06        | -0.40                 | -0.35                 | -0.05               |
| H6                                       | H9     | -0.09          | 6.11051E-07        | -0.02                 | -0.09                 | 0.07                |
| H6                                       | H10    | -0.14          | 9.65231E-07        | -0.07                 | -0.14                 | 0.07                |
| H7                                       | H8     | -0.62          | 4.30895E-06        | -0.33                 | -0.62                 | 0.29                |
| H7                                       | H9     | -3.01          | 2.08548E-05        | -3.23                 | -3.01                 | -0.21               |
| H7                                       | H10    | -0.63          | 4.34660E-06        | -0.57                 | -0.63                 | 0.05                |
| H8                                       | H9     | -0.59          | 4.06207E-06        | -0.37                 | -0.59                 | 0.21                |
| H8                                       | H10    | -3.05          | 2.11911E-05        | -3.21                 | -3.06                 | -0.14               |
| H9                                       | H10    | -0.55          | 3.81434E-06        | -0.37                 | -0.55                 | 0.19                |
| Average for $ \Delta_{XC}^{A,B} $        |        |                |                    |                       |                       | 0.1                 |
| Std. deviation for $ \Delta_{XC}^{A,B} $ |        |                |                    |                       |                       | 0.1                 |

| H...H in Linear                          |        | CCSD/BBC1      |                    | B3LYP                 |                       |                     |
|------------------------------------------|--------|----------------|--------------------|-----------------------|-----------------------|---------------------|
| Atom A                                   | Atom B | $V_{XC}^{A,B}$ | $V_{XC}^{A,B} / E$ | Comput $V_{XC}^{A,B}$ | Expect $V_{XC}^{A,B}$ | $\Delta_{XC}^{A,B}$ |
| H5                                       | H6     | -0.19          | 1.29892E-06        | -0.01                 | -0.19                 | 0.18                |
| H5                                       | H7     | -0.11          | 7.29610E-07        | -0.10                 | -0.11                 | 0.01                |
| H5                                       | H8     | -0.03          | 2.24489E-07        | -0.02                 | -0.03                 | 0.01                |
| H5                                       | H9     | -0.11          | 7.29610E-07        | -0.10                 | -0.11                 | 0.01                |
| H5                                       | H10    | -0.03          | 2.24489E-07        | -0.02                 | -0.03                 | 0.01                |
| H6                                       | H7     | -0.03          | 2.24489E-07        | -0.02                 | -0.03                 | 0.01                |
| H6                                       | H8     | -0.11          | 7.29610E-07        | -0.10                 | -0.11                 | 0.01                |
| H6                                       | H9     | -0.03          | 2.24489E-07        | -0.02                 | -0.03                 | 0.01                |
| H6                                       | H10    | -0.11          | 7.29610E-07        | -0.10                 | -0.11                 | 0.01                |
| H7                                       | H8     | -0.64          | 4.45753E-06        | -0.54                 | -0.64                 | 0.10                |
| H7                                       | H9     | -3.18          | 2.20515E-05        | -3.28                 | -3.19                 | -0.09               |
| H7                                       | H10    | -0.67          | 4.65732E-06        | -0.35                 | -0.67                 | 0.32                |
| H8                                       | H9     | -0.67          | 4.65732E-06        | -0.35                 | -0.67                 | 0.32                |
| H8                                       | H10    | -3.18          | 2.20515E-05        | -3.28                 | -3.19                 | -0.09               |
| H9                                       | H10    | -0.64          | 4.45753E-06        | -0.54                 | -0.64                 | 0.10                |
| Average for $ \Delta_{XC}^{A,B} $        |        |                |                    |                       |                       | 0.1                 |
| Std. deviation for $ \Delta_{XC}^{A,B} $ |        |                |                    |                       |                       | 0.1                 |

| H...H in Eclipsed                        |        | CCSD/BBC1      |                    | B3LYP                 |                       |                     |
|------------------------------------------|--------|----------------|--------------------|-----------------------|-----------------------|---------------------|
| Atom A                                   | Atom B | $V_{XC}^{A,B}$ | $V_{XC}^{A,B} / E$ | Comput $V_{XC}^{A,B}$ | Expect $V_{XC}^{A,B}$ | $\Delta_{XC}^{A,B}$ |
| H5                                       | H6     | -0.20          | 1.40935E-06        | -0.01                 | -0.20                 | 0.20                |
| H5                                       | H7     | -0.14          | 9.61846E-07        | -0.11                 | -0.14                 | 0.02                |
| H5                                       | H8     | -0.04          | 2.46282E-07        | -0.02                 | -0.04                 | 0.01                |
| H5                                       | H9     | -0.14          | 9.61846E-07        | -0.11                 | -0.14                 | 0.02                |
| H5                                       | H10    | -0.04          | 2.46282E-07        | -0.02                 | -0.04                 | 0.01                |
| H6                                       | H7     | -0.04          | 2.46282E-07        | -0.02                 | -0.04                 | 0.01                |
| H6                                       | H8     | -0.14          | 9.61846E-07        | -0.11                 | -0.14                 | 0.02                |
| H6                                       | H9     | -0.04          | 2.46282E-07        | -0.02                 | -0.04                 | 0.01                |
| H6                                       | H10    | -0.14          | 9.61846E-07        | -0.11                 | -0.14                 | 0.02                |
| H7                                       | H8     | -1.46          | 1.01248E-05        | -1.07                 | -1.46                 | 0.39                |
| H7                                       | H9     | -3.45          | 2.39035E-05        | -3.56                 | -3.45                 | -0.11               |
| H7                                       | H10    | -0.51          | 3.53135E-06        | -0.27                 | -0.51                 | 0.24                |
| H8                                       | H9     | -0.51          | 3.53135E-06        | -0.27                 | -0.51                 | 0.24                |
| H8                                       | H10    | -3.45          | 2.39035E-05        | -3.56                 | -3.45                 | -0.11               |
| H9                                       | H10    | -1.46          | 1.01248E-05        | -1.07                 | -1.46                 | 0.39                |
| Average for $ \Delta_{XC}^{A,B} $        |        |                |                    |                       |                       | 0.1                 |
| Std. deviation for $ \Delta_{XC}^{A,B} $ |        |                |                    |                       |                       | 0.1                 |

**Table S89.** Using the CCSD/BBC1 data as a reference, analysis of relative errors  $\Delta_{\text{int}}^{\text{A,B}}$  of interaction energies  $E_{\text{int}}^{\text{A,B}}$  computed at B3LYP-GD3 for distant C,H atom-pairs in all conformers of glycol (values in kcal mol<sup>-1</sup>).

| C...H in LEC                                            |        | CCSD/BBC1                     |                                   | B3LYP-GD3                            |                                      |                                    |
|---------------------------------------------------------|--------|-------------------------------|-----------------------------------|--------------------------------------|--------------------------------------|------------------------------------|
| Atom A                                                  | Atom B | $E_{\text{int}}^{\text{A,B}}$ | $E_{\text{int}}^{\text{A,B}} / E$ | Comput $E_{\text{int}}^{\text{A,B}}$ | Expect $E_{\text{int}}^{\text{A,B}}$ | $\Delta_{\text{int}}^{\text{A,B}}$ |
| C1                                                      | H5     | 78.29                         | -5.43115E-04                      | 71.11                                | 78.49                                | -7.38                              |
| C1                                                      | H6     | 47.76                         | -3.31314E-04                      | 42.74                                | 47.88                                | -5.14                              |
| C1                                                      | H8     | -3.92                         | 2.72198E-05                       | -2.33                                | -3.93                                | 1.61                               |
| C1                                                      | H10    | -5.06                         | 3.50861E-05                       | -3.12                                | -5.07                                | 1.96                               |
| C2                                                      | H5     | 38.67                         | -2.68255E-04                      | 34.68                                | 38.77                                | -4.09                              |
| C2                                                      | H6     | 85.16                         | -5.90764E-04                      | 77.93                                | 85.37                                | -7.44                              |
| C2                                                      | H7     | -4.58                         | 3.17769E-05                       | -2.40                                | -4.59                                | 2.19                               |
| C2                                                      | H9     | -5.06                         | 3.51173E-05                       | -3.30                                | -5.07                                | 1.77                               |
| Average for $ \Delta_{\text{int}}^{\text{A,B}} $        |        |                               |                                   |                                      |                                      | 3.9                                |
| Std. deviation for $ \Delta_{\text{int}}^{\text{A,B}} $ |        |                               |                                   |                                      |                                      | 2.5                                |

  

| C...H in Linear                                         |        | CCSD/BBC1                     |                                   | B3LYP-GD3                            |                                      |                                    |
|---------------------------------------------------------|--------|-------------------------------|-----------------------------------|--------------------------------------|--------------------------------------|------------------------------------|
| Atom A                                                  | Atom B | $E_{\text{int}}^{\text{A,B}}$ | $E_{\text{int}}^{\text{A,B}} / E$ | Comput $E_{\text{int}}^{\text{A,B}}$ | Expect $E_{\text{int}}^{\text{A,B}}$ | $\Delta_{\text{int}}^{\text{A,B}}$ |
| C1                                                      | H5     | 80.84                         | -5.60847E-04                      | 73.87                                | 81.05                                | -7.18                              |
| C1                                                      | H6     | 34.65                         | -2.40395E-04                      | 31.02                                | 34.74                                | -3.72                              |
| C1                                                      | H8     | -4.93                         | 3.41684E-05                       | -2.69                                | -4.94                                | 2.25                               |
| C1                                                      | H10    | -4.93                         | 3.41684E-05                       | -2.69                                | -4.94                                | 2.25                               |
| C2                                                      | H5     | 34.65                         | -2.40395E-04                      | 31.02                                | 34.74                                | -3.72                              |
| C2                                                      | H6     | 80.84                         | -5.60847E-04                      | 73.86                                | 81.05                                | -7.19                              |
| C2                                                      | H7     | -4.93                         | 3.41684E-05                       | -2.69                                | -4.94                                | 2.25                               |
| C2                                                      | H9     | -4.93                         | 3.41684E-05                       | -2.69                                | -4.94                                | 2.25                               |
| Average for $ \Delta_{\text{int}}^{\text{A,B}} $        |        |                               |                                   |                                      |                                      | 3.8                                |
| Std. deviation for $ \Delta_{\text{int}}^{\text{A,B}} $ |        |                               |                                   |                                      |                                      | 2.2                                |

  

| C...H in Eclipsed                                       |        | CCSD/BBC1                     |                                   | B3LYP-GD3                            |                                      |                                    |
|---------------------------------------------------------|--------|-------------------------------|-----------------------------------|--------------------------------------|--------------------------------------|------------------------------------|
| Atom A                                                  | Atom B | $E_{\text{int}}^{\text{A,B}}$ | $E_{\text{int}}^{\text{A,B}} / E$ | Comput $E_{\text{int}}^{\text{A,B}}$ | Expect $E_{\text{int}}^{\text{A,B}}$ | $\Delta_{\text{int}}^{\text{A,B}}$ |
| C1                                                      | H5     | 82.40                         | -5.71696E-04                      | 75.63                                | 82.61                                | -6.98                              |
| C1                                                      | H6     | 37.71                         | -2.61656E-04                      | 34.24                                | 37.81                                | -3.57                              |
| C1                                                      | H8     | -6.60                         | 4.58093E-05                       | -4.38                                | -6.62                                | 2.24                               |
| C1                                                      | H10    | -6.60                         | 4.58093E-05                       | -4.38                                | -6.62                                | 2.23                               |
| C2                                                      | H5     | 37.71                         | -2.61656E-04                      | 34.22                                | 37.81                                | -3.60                              |
| C2                                                      | H6     | 82.40                         | -5.71696E-04                      | 75.62                                | 82.61                                | -6.99                              |
| C2                                                      | H7     | -6.60                         | 4.58093E-05                       | -4.38                                | -6.62                                | 2.24                               |
| C2                                                      | H9     | -6.60                         | 4.58093E-05                       | -4.38                                | -6.62                                | 2.24                               |
| Average for $ \Delta_{\text{int}}^{\text{A,B}} $        |        |                               |                                   |                                      |                                      | 3.8                                |
| Std. deviation for $ \Delta_{\text{int}}^{\text{A,B}} $ |        |                               |                                   |                                      |                                      | 2.1                                |

**Table S90.** Using the CCSD/BBC1 data as a reference, analysis of relative errors  $\Delta_{cl}^{A,B}$  in the classical term  $V_{cl}^{A,B}$  of interaction energies computed at B3LYP-GD3 for distant C,H atom-pairs in all conformers of glycol (values in kcal mol<sup>-1</sup>).

| <b>C...H in LEC</b>                      |               | <b>CCSD/BBC1</b> |                    | <b>B3LYP-GD3</b>      |                       |                     |
|------------------------------------------|---------------|------------------|--------------------|-----------------------|-----------------------|---------------------|
| <b>Atom A</b>                            | <b>Atom B</b> | $V_{cl}^{A,B}$   | $V_{cl}^{A,B} / E$ | Comput $V_{cl}^{A,B}$ | Expect $V_{cl}^{A,B}$ | $\Delta_{cl}^{A,B}$ |
| C1                                       | H5            | 79.50            | -5.51515E-04       | 72.25                 | 79.70                 | -7.45               |
| C1                                       | H6            | 48.29            | -3.35024E-04       | 42.93                 | 48.42                 | -5.49               |
| C1                                       | H8            | 0.12             | -8.38500E-07       | 1.73                  | 0.12                  | 1.61                |
| C1                                       | H10           | -1.10            | 7.61256E-06        | 0.76                  | -1.10                 | 1.86                |
| C2                                       | H5            | 39.11            | -2.71330E-04       | 35.06                 | 39.21                 | -4.15               |
| C2                                       | H6            | 86.47            | -5.99872E-04       | 79.03                 | 86.69                 | -7.66               |
| C2                                       | H7            | -0.83            | 5.78789E-06        | 1.13                  | -0.84                 | 1.96                |
| C2                                       | H9            | -1.27            | 8.79525E-06        | 0.53                  | -1.27                 | 1.80                |
| Average for $ \Delta_{cl}^{A,B} $        |               |                  |                    |                       |                       | 4.0                 |
| Std. deviation for $ \Delta_{cl}^{A,B} $ |               |                  |                    |                       |                       | 2.6                 |
| <hr/>                                    |               |                  |                    |                       |                       |                     |
| <b>C...H in Linear</b>                   |               | <b>CCSD/BBC1</b> |                    | <b>B3LYP-GD3</b>      |                       |                     |
| <b>Atom A</b>                            | <b>Atom B</b> | $V_{cl}^{A,B}$   | $V_{cl}^{A,B} / E$ | Comput $V_{cl}^{A,B}$ | Expect $V_{cl}^{A,B}$ | $\Delta_{cl}^{A,B}$ |
| C1                                       | H5            | 82.17            | -5.70019E-04       | 75.03                 | 82.38                 | -7.34               |
| C1                                       | H6            | 35.15            | -2.43847E-04       | 31.41                 | 35.24                 | -3.83               |
| C1                                       | H8            | -1.14            | 7.88614E-06        | 0.82                  | -1.14                 | 1.96                |
| C1                                       | H10           | -1.14            | 7.88614E-06        | 0.82                  | -1.14                 | 1.96                |
| C2                                       | H5            | 35.15            | -2.43847E-04       | 31.41                 | 35.24                 | -3.83               |
| C2                                       | H6            | 82.17            | -5.70019E-04       | 75.03                 | 82.38                 | -7.34               |
| C2                                       | H7            | -1.14            | 7.88614E-06        | 0.82                  | -1.14                 | 1.96                |
| C2                                       | H9            | -1.14            | 7.88614E-06        | 0.82                  | -1.14                 | 1.96                |
| Average for $ \Delta_{cl}^{A,B} $        |               |                  |                    |                       |                       | 3.8                 |
| Std. deviation for $ \Delta_{cl}^{A,B} $ |               |                  |                    |                       |                       | 2.4                 |
| <hr/>                                    |               |                  |                    |                       |                       |                     |
| <b>C...H in Eclipsed</b>                 |               | <b>CCSD/BBC1</b> |                    | <b>B3LYP-GD3</b>      |                       |                     |
| <b>Atom A</b>                            | <b>Atom B</b> | $V_{cl}^{A,B}$   | $V_{cl}^{A,B} / E$ | Comput $V_{cl}^{A,B}$ | Expect $V_{cl}^{A,B}$ | $\Delta_{cl}^{A,B}$ |
| C1                                       | H5            | 83.83            | -5.81584E-04       | 76.88                 | 84.04                 | -7.16               |
| C1                                       | H6            | 38.20            | -2.65018E-04       | 34.61                 | 38.30                 | -3.68               |
| C1                                       | H8            | -2.54            | 1.76089E-05        | -0.58                 | -2.54                 | 1.97                |
| C1                                       | H10           | -2.54            | 1.76089E-05        | -0.58                 | -2.54                 | 1.97                |
| C2                                       | H5            | 38.20            | -2.65018E-04       | 34.59                 | 38.30                 | -3.71               |
| C2                                       | H6            | 83.83            | -5.81584E-04       | 76.87                 | 84.04                 | -7.17               |
| C2                                       | H7            | -2.54            | 1.76089E-05        | -0.58                 | -2.54                 | 1.97                |
| C2                                       | H9            | -2.54            | 1.76089E-05        | -0.58                 | -2.54                 | 1.97                |
| Average for $ \Delta_{cl}^{A,B} $        |               |                  |                    |                       |                       | 3.7                 |
| Std. deviation for $ \Delta_{cl}^{A,B} $ |               |                  |                    |                       |                       | 2.3                 |



**Table S91.** Using the CCSD/BBC1 data as a reference, analysis of relative errors  $\Delta_{XC}^{A,B}$  in the XC-term  $V_{XC}^{A,B}$  of interaction energies computed at B3LYP-GD3 for distant C,H atom-pairs in all conformers of glycol (values in kcal mol<sup>-1</sup>).

| <b>C...H in LEC</b>                      |               | <b>CCSD/BBC1</b> |                    | <b>B3LYP-GD3</b>      |                       |                     |
|------------------------------------------|---------------|------------------|--------------------|-----------------------|-----------------------|---------------------|
| <b>Atom A</b>                            | <b>Atom B</b> | $V_{XC}^{A,B}$   | $V_{XC}^{A,B} / E$ | Comput $V_{XC}^{A,B}$ | Expect $V_{XC}^{A,B}$ | $\Delta_{XC}^{A,B}$ |
| C1                                       | H5            | -1.21            | 8.40036E-06        | -1.14                 | -1.21                 | 0.07                |
| C1                                       | H6            | -0.53            | 3.70975E-06        | -0.19                 | -0.54                 | 0.35                |
| C1                                       | H8            | -4.04            | 2.80583E-05        | -4.06                 | -4.05                 | 0.00                |
| C1                                       | H10           | -3.96            | 2.74736E-05        | -3.87                 | -3.97                 | 0.10                |
| C2                                       | H5            | -0.44            | 3.07551E-06        | -0.39                 | -0.44                 | 0.06                |
| C2                                       | H6            | -1.31            | 9.10774E-06        | -1.10                 | -1.32                 | 0.22                |
| C2                                       | H7            | -3.75            | 2.59890E-05        | -3.53                 | -3.76                 | 0.23                |
| C2                                       | H9            | -3.79            | 2.63220E-05        | -3.84                 | -3.80                 | -0.03               |
| Average for $ \Delta_{XC}^{A,B} $        |               |                  |                    |                       |                       | 0.1                 |
| Std. deviation for $ \Delta_{XC}^{A,B} $ |               |                  |                    |                       |                       | 0.1                 |
| <b>C...H in Linear</b>                   |               | <b>CCSD/BBC1</b> |                    | <b>B3LYP-GD3</b>      |                       |                     |
| <b>Atom A</b>                            | <b>Atom B</b> | $V_{XC}^{A,B}$   | $V_{XC}^{A,B} / E$ | Comput $V_{XC}^{A,B}$ | Expect $V_{XC}^{A,B}$ | $\Delta_{XC}^{A,B}$ |
| C1                                       | H5            | -1.32            | 9.17191E-06        | -1.17                 | -1.33                 | 0.16                |
| C1                                       | H6            | -0.50            | 3.45234E-06        | -0.39                 | -0.50                 | 0.11                |
| C1                                       | H8            | -3.79            | 2.62822E-05        | -3.51                 | -3.80                 | 0.29                |
| C1                                       | H10           | -3.79            | 2.62822E-05        | -3.51                 | -3.80                 | 0.28                |
| C2                                       | H5            | -0.50            | 3.45234E-06        | -0.39                 | -0.50                 | 0.11                |
| C2                                       | H6            | -1.32            | 9.17191E-06        | -1.17                 | -1.33                 | 0.16                |
| C2                                       | H7            | -3.79            | 2.62822E-05        | -3.51                 | -3.80                 | 0.29                |
| C2                                       | H9            | -3.79            | 2.62822E-05        | -3.51                 | -3.80                 | 0.28                |
| Average for $ \Delta_{XC}^{A,B} $        |               |                  |                    |                       |                       | 0.2                 |
| Std. deviation for $ \Delta_{XC}^{A,B} $ |               |                  |                    |                       |                       | 0.1                 |
| <b>C...H in Eclipsed</b>                 |               | <b>CCSD/BBC1</b> |                    | <b>B3LYP-GD3</b>      |                       |                     |
| <b>Atom A</b>                            | <b>Atom B</b> | $V_{XC}^{A,B}$   | $V_{XC}^{A,B} / E$ | Comput $V_{XC}^{A,B}$ | Expect $V_{XC}^{A,B}$ | $\Delta_{XC}^{A,B}$ |
| C1                                       | H5            | -1.43            | 9.88825E-06        | -1.25                 | -1.43                 | 0.18                |
| C1                                       | H6            | -0.48            | 3.36254E-06        | -0.37                 | -0.49                 | 0.11                |
| C1                                       | H8            | -4.06            | 2.82004E-05        | -3.81                 | -4.08                 | 0.27                |
| C1                                       | H10           | -4.06            | 2.82004E-05        | -3.81                 | -4.08                 | 0.27                |
| C2                                       | H5            | -0.48            | 3.36254E-06        | -0.37                 | -0.49                 | 0.11                |
| C2                                       | H6            | -1.43            | 9.88825E-06        | -1.25                 | -1.43                 | 0.18                |
| C2                                       | H7            | -4.06            | 2.82004E-05        | -3.81                 | -4.08                 | 0.27                |
| C2                                       | H9            | -4.06            | 2.82004E-05        | -3.81                 | -4.08                 | 0.27                |
| Average for $ \Delta_{XC}^{A,B} $        |               |                  |                    |                       |                       | 0.2                 |
| Std. deviation for $ \Delta_{XC}^{A,B} $ |               |                  |                    |                       |                       | 0.1                 |

**Table S92.** Using the CCSD/BBC1 data as a reference, analysis of relative errors  $\Delta_{\text{int}}^{\text{A,B}}$  in interaction energies  $E_{\text{int}}^{\text{A,B}}$  computed at B3LYP-GD3 for distant O,H atom-pairs in all conformers of glycol (values in kcal mol<sup>-1</sup>).

| O...H in LEC                                            |        | CCSD/BBC1                     |                                   | B3LYP-GD3                            |                                      |                                    |
|---------------------------------------------------------|--------|-------------------------------|-----------------------------------|--------------------------------------|--------------------------------------|------------------------------------|
| Atom A                                                  | Atom B | $E_{\text{int}}^{\text{A,B}}$ | $E_{\text{int}}^{\text{A,B}} / E$ | Comput $E_{\text{int}}^{\text{A,B}}$ | Expect $E_{\text{int}}^{\text{A,B}}$ | $\Delta_{\text{int}}^{\text{A,B}}$ |
| O3                                                      | H5     | -63.47                        | 4.40340E-04                       | -60.69                               | -63.64                               | 2.95                               |
| O3                                                      | H7     | 1.53                          | -1.05919E-05                      | -0.80                                | 1.53                                 | -2.34                              |
| O3                                                      | H8     | -6.44                         | 4.46864E-05                       | -10.35                               | -6.46                                | -3.89                              |
| O3                                                      | H9     | 1.74                          | -1.20837E-05                      | -0.28                                | 1.75                                 | -2.02                              |
| O3                                                      | H10    | -4.72                         | 3.27422E-05                       | -8.98                                | -4.73                                | -4.25                              |
| O4                                                      | H6     | -90.89                        | 6.30517E-04                       | -85.76                               | -91.12                               | 5.36                               |
| O4                                                      | H7     | -4.46                         | 3.09496E-05                       | -8.67                                | -4.47                                | -4.20                              |
| O4                                                      | H8     | 0.02                          | -1.51058E-07                      | -2.08                                | 0.02                                 | -2.10                              |
| O4                                                      | H9     | -3.22                         | 2.23074E-05                       | -7.27                                | -3.22                                | -4.05                              |
| O4                                                      | H10    | 1.98                          | -1.37476E-05                      | -0.43                                | 1.99                                 | -2.42                              |
| Average for $ \Delta_{\text{int}}^{\text{A,B}} $        |        |                               |                                   |                                      |                                      | 3.4                                |
| Std. deviation for $ \Delta_{\text{int}}^{\text{A,B}} $ |        |                               |                                   |                                      |                                      | 1.1                                |

| O...H in Linear                                         |        | CCSD/BBC1                     |                                   | B3LYP-GD3                            |                                      |                                    |
|---------------------------------------------------------|--------|-------------------------------|-----------------------------------|--------------------------------------|--------------------------------------|------------------------------------|
| Atom A                                                  | Atom B | $E_{\text{int}}^{\text{A,B}}$ | $E_{\text{int}}^{\text{A,B}} / E$ | Comput $E_{\text{int}}^{\text{A,B}}$ | Expect $E_{\text{int}}^{\text{A,B}}$ | $\Delta_{\text{int}}^{\text{A,B}}$ |
| O3                                                      | H5     | -50.37                        | 3.49449E-04                       | -48.35                               | -50.50                               | 2.15                               |
| O3                                                      | H7     | 2.11                          | -1.46101E-05                      | -0.16                                | 2.11                                 | -2.27                              |
| O3                                                      | H8     | -3.97                         | 2.75121E-05                       | -8.24                                | -3.98                                | -4.26                              |
| O3                                                      | H9     | 2.11                          | -1.46101E-05                      | -0.16                                | 2.11                                 | -2.27                              |
| O3                                                      | H10    | -3.97                         | 2.75121E-05                       | -8.24                                | -3.98                                | -4.26                              |
| O4                                                      | H6     | -50.37                        | 3.49449E-04                       | -48.35                               | -50.50                               | 2.15                               |
| O4                                                      | H7     | -3.97                         | 2.75121E-05                       | -8.24                                | -3.98                                | -4.26                              |
| O4                                                      | H8     | 2.11                          | -1.46101E-05                      | -0.16                                | 2.11                                 | -2.27                              |
| O4                                                      | H9     | -3.97                         | 2.75121E-05                       | -8.24                                | -3.98                                | -4.26                              |
| O4                                                      | H10    | 2.11                          | -1.46101E-05                      | -0.16                                | 2.11                                 | -2.27                              |
| Average for $ \Delta_{\text{int}}^{\text{A,B}} $        |        |                               |                                   |                                      |                                      | 3.0                                |
| Std. deviation for $ \Delta_{\text{int}}^{\text{A,B}} $ |        |                               |                                   |                                      |                                      | 1.1                                |

| O...H in Eclipsed                                       |        | CCSD/BBC1                     |                                   | B3LYP-GD3                            |                                      |                                    |
|---------------------------------------------------------|--------|-------------------------------|-----------------------------------|--------------------------------------|--------------------------------------|------------------------------------|
| Atom A                                                  | Atom B | $E_{\text{int}}^{\text{A,B}}$ | $E_{\text{int}}^{\text{A,B}} / E$ | Comput $E_{\text{int}}^{\text{A,B}}$ | Expect $E_{\text{int}}^{\text{A,B}}$ | $\Delta_{\text{int}}^{\text{A,B}}$ |
| O3                                                      | H5     | -59.43                        | 4.12334E-04                       | -57.18                               | -59.58                               | 2.40                               |
| O3                                                      | H7     | 3.69                          | -2.56299E-05                      | 1.86                                 | 3.70                                 | -1.84                              |
| O3                                                      | H8     | -1.45                         | 1.00861E-05                       | -5.82                                | -1.46                                | -4.36                              |
| O3                                                      | H9     | 3.69                          | -2.56299E-05                      | 1.86                                 | 3.70                                 | -1.84                              |
| O3                                                      | H10    | -1.45                         | 1.00861E-05                       | -5.82                                | -1.46                                | -4.36                              |
| O4                                                      | H6     | -59.43                        | 4.12334E-04                       | -57.18                               | -59.58                               | 2.40                               |
| O4                                                      | H7     | -1.45                         | 1.00861E-05                       | -5.82                                | -1.46                                | -4.36                              |
| O4                                                      | H8     | 3.69                          | -2.56299E-05                      | 1.86                                 | 3.70                                 | -1.84                              |
| O4                                                      | H9     | -1.45                         | 1.00861E-05                       | -5.82                                | -1.46                                | -4.36                              |
| O4                                                      | H10    | 3.69                          | -2.56299E-05                      | 1.86                                 | 3.70                                 | -1.84                              |
| Average for $ \Delta_{\text{int}}^{\text{A,B}} $        |        |                               |                                   |                                      |                                      | 3.0                                |
| Std. deviation for $ \Delta_{\text{int}}^{\text{A,B}} $ |        |                               |                                   |                                      |                                      | 1.2                                |

**Table S93.** Using the CCSD/BBC1 data as a reference, analysis of relative errors  $\Delta_{\text{cl}}^{\text{A,B}}$  in the classical term  $V_{\text{cl}}^{\text{A,B}}$  of interaction energies computed at B3LYP-GD3 for distant O,H atom-pairs in all conformers of glycol (values in kcal mol<sup>-1</sup>).

| O...H in LEC                                           |        | CCSD/BBC1                    |                                  | B3LYP-GD3                           |                                     |                                   |
|--------------------------------------------------------|--------|------------------------------|----------------------------------|-------------------------------------|-------------------------------------|-----------------------------------|
| Atom A                                                 | Atom B | $V_{\text{cl}}^{\text{A,B}}$ | $V_{\text{cl}}^{\text{A,B}} / E$ | Comput $V_{\text{cl}}^{\text{A,B}}$ | Expect $V_{\text{cl}}^{\text{A,B}}$ | $\Delta_{\text{cl}}^{\text{A,B}}$ |
| O3                                                     | H5     | 79.50                        | -5.51515E-04                     | 72.25                               | 79.70                               | -7.45                             |
| O3                                                     | H7     | 48.29                        | -3.35024E-04                     | 42.93                               | 48.42                               | -5.49                             |
| O3                                                     | H8     | 0.12                         | -8.38500E-07                     | 1.73                                | 0.12                                | 1.61                              |
| O3                                                     | H9     | -1.10                        | 7.61256E-06                      | 0.76                                | -1.10                               | 1.86                              |
| O3                                                     | H10    | 39.11                        | -2.71330E-04                     | 35.06                               | 39.21                               | -4.15                             |
| O4                                                     | H6     | 86.47                        | -5.99872E-04                     | 79.03                               | 86.69                               | -7.66                             |
| O4                                                     | H7     | -0.83                        | 5.78789E-06                      | 1.13                                | -0.84                               | 1.96                              |
| O4                                                     | H8     | -1.27                        | 8.79525E-06                      | 0.53                                | -1.27                               | 1.80                              |
| O4                                                     | H9     | 79.50                        | -5.51515E-04                     | 72.25                               | 79.70                               | -7.45                             |
| O4                                                     | H10    | 48.29                        | -3.35024E-04                     | 42.93                               | 48.42                               | -5.49                             |
| Average for $ \Delta_{\text{cl}}^{\text{A,B}} $        |        |                              |                                  |                                     |                                     | 4.0                               |
| Std. deviation for $ \Delta_{\text{cl}}^{\text{A,B}} $ |        |                              |                                  |                                     |                                     | 2.6                               |

| <b>O...H in Linear</b>                   |               | <b>CCSD/BBC1</b> |                    | <b>B3LYP-GD3</b>      |                       |                     |
|------------------------------------------|---------------|------------------|--------------------|-----------------------|-----------------------|---------------------|
| <b>Atom A</b>                            | <b>Atom B</b> | $V_{cl}^{A,B}$   | $V_{cl}^{A,B} / E$ | Comput $V_{cl}^{A,B}$ | Expect $V_{cl}^{A,B}$ | $\Delta_{cl}^{A,B}$ |
| O3                                       | H5            | -49.87           | 3.45955E-04        | -48.28                | -50.00                | 1.71                |
| O3                                       | H7            | 4.07             | -2.82240E-05       | 1.31                  | 4.08                  | -2.77               |
| O3                                       | H8            | 2.14             | -1.48185E-05       | -1.44                 | 2.14                  | -3.59               |
| O3                                       | H9            | 4.07             | -2.82240E-05       | 1.31                  | 4.08                  | -2.77               |
| O3                                       | H10           | 2.14             | -1.48185E-05       | -1.44                 | 2.14                  | -3.59               |
| O4                                       | H6            | -49.87           | 3.45955E-04        | -48.28                | -50.00                | 1.71                |
| O4                                       | H7            | 2.14             | -1.48185E-05       | -1.44                 | 2.14                  | -3.59               |
| O4                                       | H8            | 4.07             | -2.82240E-05       | 1.31                  | 4.08                  | -2.77               |
| O4                                       | H9            | 2.14             | -1.48185E-05       | -1.44                 | 2.14                  | -3.59               |
| O4                                       | H10           | 4.07             | -2.82240E-05       | 1.31                  | 4.08                  | -2.77               |
| Average for $ \Delta_{cl}^{A,B} $        |               |                  |                    |                       |                       | 2.9                 |
| Std. deviation for $ \Delta_{cl}^{A,B} $ |               |                  |                    |                       |                       | 0.7                 |

| <b>O...H in Eclipsed</b>                 |               | <b>CCSD/BBC1</b> |                    | <b>B3LYP-GD3</b>      |                       |                     |
|------------------------------------------|---------------|------------------|--------------------|-----------------------|-----------------------|---------------------|
| <b>Atom A</b>                            | <b>Atom B</b> | $V_{cl}^{A,B}$   | $V_{cl}^{A,B} / E$ | Comput $V_{cl}^{A,B}$ | Expect $V_{cl}^{A,B}$ | $\Delta_{cl}^{A,B}$ |
| O3                                       | H5            | 83.83            | -5.81584E-04       | 76.88                 | 84.04                 | -7.16               |
| O3                                       | H7            | 38.20            | -2.65018E-04       | 34.61                 | 38.30                 | -3.68               |
| O3                                       | H8            | -2.54            | 1.76089E-05        | -0.58                 | -2.54                 | 1.97                |
| O3                                       | H9            | -2.54            | 1.76089E-05        | -0.58                 | -2.54                 | 1.97                |
| O3                                       | H10           | 38.20            | -2.65018E-04       | 34.59                 | 38.30                 | -3.71               |
| O4                                       | H6            | 83.83            | -5.81584E-04       | 76.87                 | 84.04                 | -7.17               |
| O4                                       | H7            | -2.54            | 1.76089E-05        | -0.58                 | -2.54                 | 1.97                |
| O4                                       | H8            | -2.54            | 1.76089E-05        | -0.58                 | -2.54                 | 1.97                |
| O4                                       | H9            | 83.83            | -5.81584E-04       | 76.88                 | 84.04                 | -7.16               |
| O4                                       | H10           | 38.20            | -2.65018E-04       | 34.61                 | 38.30                 | -3.68               |
| Average for $ \Delta_{cl}^{A,B} $        |               |                  |                    |                       |                       | 3.7                 |
| Std. deviation for $ \Delta_{cl}^{A,B} $ |               |                  |                    |                       |                       | 2.3                 |

**Table S94.** Using the CCSD/BBC1 data as a reference, analysis of relative errors  $\Delta_{XC}^{A,B}$  in the XC\_term of interaction energies computed at B3LYP-GD3 for distant O,H atom-pairs in all conformers of glycol (values in kcal mol<sup>-1</sup>).

| O...H in LEC                             |        | CCSD/BBC1      |                    | B3LYP-GD3             |                       |                     |
|------------------------------------------|--------|----------------|--------------------|-----------------------|-----------------------|---------------------|
| Atom A                                   | Atom B | $V_{XC}^{A,B}$ | $V_{XC}^{A,B} / E$ | Comput $V_{XC}^{A,B}$ | Expect $V_{XC}^{A,B}$ | $\Delta_{XC}^{A,B}$ |
| O3                                       | H5     | -0.35          | 2.44852E-06        | -0.06                 | -0.35                 | 0.30                |
| O3                                       | H7     | -2.00          | 1.38900E-05        | -1.49                 | -2.01                 | 0.52                |
| O3                                       | H8     | -6.27          | 4.34686E-05        | -6.60                 | -6.28                 | -0.32               |
| O3                                       | H9     | -1.14          | 7.90820E-06        | -0.83                 | -1.14                 | 0.31                |
| O3                                       | H10    | -6.42          | 4.45528E-05        | -6.97                 | -6.44                 | -0.53               |
| O4                                       | H6     | -3.03          | 2.10430E-05        | -2.22                 | -3.04                 | 0.82                |
| O4                                       | H7     | -6.28          | 4.35390E-05        | -6.88                 | -6.29                 | -0.59               |
| O4                                       | H8     | -0.86          | 5.98068E-06        | -0.69                 | -0.86                 | 0.18                |
| O4                                       | H9     | -6.50          | 4.51269E-05        | -6.88                 | -6.52                 | -0.35               |
| O4                                       | H10    | -1.99          | 1.38080E-05        | -1.49                 | -2.00                 | 0.51                |
| Average for $ \Delta_{XC}^{A,B} $        |        |                |                    |                       |                       | 0.4                 |
| Std. deviation for $ \Delta_{XC}^{A,B} $ |        |                |                    |                       |                       | 0.2                 |

| O...H in Linear                          |        | CCSD/BBC1      |                    | B3LYP-GD3             |                       |                     |
|------------------------------------------|--------|----------------|--------------------|-----------------------|-----------------------|---------------------|
| Atom A                                   | Atom B | $V_{XC}^{A,B}$ | $V_{XC}^{A,B} / E$ | Comput $V_{XC}^{A,B}$ | Expect $V_{XC}^{A,B}$ | $\Delta_{XC}^{A,B}$ |
| O3                                       | H5     | -0.50          | 3.49384E-06        | -0.07                 | -0.50                 | 0.43                |
| O3                                       | H7     | -1.96          | 1.36138E-05        | -1.47                 | -1.97                 | 0.50                |
| O3                                       | H8     | -6.10          | 4.23306E-05        | -6.80                 | -6.12                 | -0.68               |
| O3                                       | H9     | -1.96          | 1.36138E-05        | -1.47                 | -1.97                 | 0.50                |
| O3                                       | H10    | -6.10          | 4.23306E-05        | -6.79                 | -6.12                 | -0.68               |
| O4                                       | H6     | -0.50          | 3.49384E-06        | -0.07                 | -0.50                 | 0.43                |
| O4                                       | H7     | -6.10          | 4.23306E-05        | -6.80                 | -6.12                 | -0.68               |
| O4                                       | H8     | -1.96          | 1.36138E-05        | -1.47                 | -1.97                 | 0.50                |
| O4                                       | H9     | -6.10          | 4.23306E-05        | -6.80                 | -6.12                 | -0.68               |
| O4                                       | H10    | -1.96          | 1.36138E-05        | -1.47                 | -1.97                 | 0.50                |
| Average for $ \Delta_{XC}^{A,B} $        |        |                |                    |                       |                       | 0.6                 |
| Std. deviation for $ \Delta_{XC}^{A,B} $ |        |                |                    |                       |                       | 0.1                 |

| O...H in Eclipsed                        |        | CCSD/BBC1      |                    | B3LYP-GD3             |                       |                     |
|------------------------------------------|--------|----------------|--------------------|-----------------------|-----------------------|---------------------|
| Atom A                                   | Atom B | $V_{XC}^{A,B}$ | $V_{XC}^{A,B} / E$ | Comput $V_{XC}^{A,B}$ | Expect $V_{XC}^{A,B}$ | $\Delta_{XC}^{A,B}$ |
| O3                                       | H5     | -0.67          | 4.62679E-06        | -0.15                 | -0.67                 | 0.52                |
| O3                                       | H7     | -0.70          | 4.84171E-06        | -0.28                 | -0.70                 | 0.42                |
| O3                                       | H8     | -6.58          | 4.56687E-05        | -7.36                 | -6.60                 | -0.76               |
| O3                                       | H9     | -0.70          | 4.84171E-06        | -0.28                 | -0.70                 | 0.42                |
| O3                                       | H10    | -6.58          | 4.56687E-05        | -7.36                 | -6.60                 | -0.76               |
| O4                                       | H6     | -0.67          | 4.62679E-06        | -0.15                 | -0.67                 | 0.52                |
| O4                                       | H7     | -6.58          | 4.56687E-05        | -7.36                 | -6.60                 | -0.76               |
| O4                                       | H8     | -0.70          | 4.84171E-06        | -0.28                 | -0.70                 | 0.42                |
| O4                                       | H9     | -6.58          | 4.56687E-05        | -7.36                 | -6.60                 | -0.76               |
| O4                                       | H10    | -0.70          | 4.84171E-06        | -0.28                 | -0.70                 | 0.42                |
| Average for $ \Delta_{XC}^{A,B} $        |        |                |                    |                       |                       | 0.6                 |
| Std. deviation for $ \Delta_{XC}^{A,B} $ |        |                |                    |                       |                       | 0.2                 |

**Table S95.** Using the CCSD/BBC1 data as a reference, analysis of relative errors  $\Delta_{int}^{A,B}$  in interaction energies  $E_{int}^{A,B}$  computed at B3LYP-GD3 for distant H,H atom-pairs in all conformers of glycol (values in kcal mol<sup>-1</sup>).

| H...H in LEC                              |        | CCSD/BBC1       |                     | B3LYP-GD3              |                        |                      |
|-------------------------------------------|--------|-----------------|---------------------|------------------------|------------------------|----------------------|
| Atom A                                    | Atom B | $E_{int}^{A,B}$ | $E_{int}^{A,B} / E$ | Comput $E_{int}^{A,B}$ | Expect $E_{int}^{A,B}$ | $\Delta_{int}^{A,B}$ |
| H5                                        | H6     | 36.97           | -2.56444E-04        | 35.95                  | 37.06                  | -1.11                |
| H5                                        | H7     | -1.91           | 1.32190E-05         | -0.02                  | -1.91                  | 1.89                 |
| H5                                        | H8     | -0.65           | 4.54108E-06         | 0.38                   | -0.66                  | 1.03                 |
| H5                                        | H9     | -2.20           | 1.52426E-05         | -0.45                  | -2.20                  | 1.75                 |
| H5                                        | H10    | -1.79           | 1.23902E-05         | -0.54                  | -1.79                  | 1.25                 |
| H6                                        | H7     | -1.78           | 1.23769E-05         | -0.26                  | -1.79                  | 1.53                 |
| H6                                        | H8     | -0.43           | 2.95773E-06         | 1.07                   | -0.43                  | 1.49                 |
| H6                                        | H9     | -1.50           | 1.03754E-05         | -0.27                  | -1.50                  | 1.23                 |
| H6                                        | H10    | -1.52           | 1.05510E-05         | 0.38                   | -1.52                  | 1.91                 |
| H7                                        | H8     | -0.42           | 2.91928E-06         | -0.16                  | -0.42                  | 0.26                 |
| H7                                        | H9     | -2.32           | 1.60696E-05         | -2.48                  | -2.32                  | -0.16                |
| H7                                        | H10    | -0.55           | 3.79630E-06         | -0.51                  | -0.55                  | 0.04                 |
| H8                                        | H9     | -0.32           | 2.23740E-06         | -0.20                  | -0.32                  | 0.12                 |
| H8                                        | H10    | -2.38           | 1.65337E-05         | -2.41                  | -2.39                  | -0.02                |
| H9                                        | H10    | -0.25           | 1.74888E-06         | -0.18                  | -0.25                  | 0.08                 |
| Average for $ \Delta_{int}^{A,B} $        |        |                 |                     |                        |                        | 0.9                  |
| Std. deviation for $ \Delta_{int}^{A,B} $ |        |                 |                     |                        |                        | 0.7                  |

| H...H in Linear                                         |        | CCSD/BBC1                     |                                   | B3LYP-GD3                            |                                      |                                    |
|---------------------------------------------------------|--------|-------------------------------|-----------------------------------|--------------------------------------|--------------------------------------|------------------------------------|
| Atom A                                                  | Atom B | $E_{\text{int}}^{\text{A,B}}$ | $E_{\text{int}}^{\text{A,B}} / E$ | Comput $E_{\text{int}}^{\text{A,B}}$ | Expect $E_{\text{int}}^{\text{A,B}}$ | $\Delta_{\text{int}}^{\text{A,B}}$ |
| H5                                                      | H6     | 22.72                         | -1.57635E-04                      | 22.59                                | 22.78                                | -0.19                              |
| H5                                                      | H7     | -1.84                         | 1.27666E-05                       | -0.07                                | -1.84                                | 1.78                               |
| H5                                                      | H8     | -1.82                         | 1.25965E-05                       | -0.63                                | -1.82                                | 1.19                               |
| H5                                                      | H9     | -1.84                         | 1.27666E-05                       | -0.07                                | -1.84                                | 1.78                               |
| H5                                                      | H10    | -1.82                         | 1.25965E-05                       | -0.63                                | -1.82                                | 1.19                               |
| H6                                                      | H7     | -1.82                         | 1.25965E-05                       | -0.63                                | -1.82                                | 1.19                               |
| H6                                                      | H8     | -1.84                         | 1.27666E-05                       | -0.07                                | -1.84                                | 1.78                               |
| H6                                                      | H9     | -1.82                         | 1.25965E-05                       | -0.63                                | -1.82                                | 1.19                               |
| H6                                                      | H10    | -1.84                         | 1.27666E-05                       | -0.07                                | -1.84                                | 1.78                               |
| H7                                                      | H8     | -0.57                         | 3.92163E-06                       | -0.48                                | -0.57                                | 0.09                               |
| H7                                                      | H9     | -2.51                         | 1.73979E-05                       | -2.53                                | -2.51                                | -0.02                              |
| H7                                                      | H10    | -0.46                         | 3.19134E-06                       | -0.20                                | -0.46                                | 0.26                               |
| H8                                                      | H9     | -0.46                         | 3.19134E-06                       | -0.20                                | -0.46                                | 0.26                               |
| H8                                                      | H10    | -2.51                         | 1.73979E-05                       | -2.53                                | -2.51                                | -0.02                              |
| H9                                                      | H10    | -0.57                         | 3.92163E-06                       | -0.48                                | -0.57                                | 0.09                               |
| Average for $ \Delta_{\text{int}}^{\text{A,B}} $        |        |                               |                                   |                                      |                                      | 0.9                                |
| Std. deviation for $ \Delta_{\text{int}}^{\text{A,B}} $ |        |                               |                                   |                                      |                                      | 0.7                                |

| H...H in Eclipsed                                       |        | CCSD/BBC1                     |                                   | B3LYP-GD3                            |                                      |                                    |
|---------------------------------------------------------|--------|-------------------------------|-----------------------------------|--------------------------------------|--------------------------------------|------------------------------------|
| Atom A                                                  | Atom B | $E_{\text{int}}^{\text{A,B}}$ | $E_{\text{int}}^{\text{A,B}} / E$ | Comput $E_{\text{int}}^{\text{A,B}}$ | Expect $E_{\text{int}}^{\text{A,B}}$ | $\Delta_{\text{int}}^{\text{A,B}}$ |
| H5                                                      | H6     | 25.93                         | -1.79929E-04                      | 25.85                                | 26.00                                | -0.16                              |
| H5                                                      | H7     | -3.37                         | 2.33517E-05                       | -1.56                                | -3.37                                | 1.82                               |
| H5                                                      | H8     | -2.23                         | 1.54635E-05                       | -1.20                                | -2.23                                | 1.04                               |
| H5                                                      | H9     | -3.37                         | 2.33517E-05                       | -1.56                                | -3.37                                | 1.82                               |
| H5                                                      | H10    | -2.23                         | 1.54635E-05                       | -1.20                                | -2.23                                | 1.04                               |
| H6                                                      | H7     | -2.23                         | 1.54635E-05                       | -1.20                                | -2.23                                | 1.04                               |
| H6                                                      | H8     | -3.37                         | 2.33517E-05                       | -1.56                                | -3.37                                | 1.82                               |
| H6                                                      | H9     | -2.23                         | 1.54635E-05                       | -1.20                                | -2.23                                | 1.04                               |
| H6                                                      | H10    | -3.37                         | 2.33517E-05                       | -1.56                                | -3.37                                | 1.82                               |
| H7                                                      | H8     | -0.88                         | 6.13093E-06                       | -0.70                                | -0.89                                | 0.18                               |
| H7                                                      | H9     | -2.65                         | 1.83821E-05                       | -2.84                                | -2.66                                | -0.18                              |
| H7                                                      | H10    | -0.25                         | 1.76286E-06                       | -0.14                                | -0.25                                | 0.12                               |
| H8                                                      | H9     | -0.25                         | 1.76286E-06                       | -0.14                                | -0.25                                | 0.12                               |
| H8                                                      | H10    | -2.65                         | 1.83821E-05                       | -2.84                                | -2.66                                | -0.18                              |
| H9                                                      | H10    | -0.88                         | 6.13093E-06                       | -0.70                                | -0.89                                | 0.18                               |
| Average for $ \Delta_{\text{int}}^{\text{A,B}} $        |        |                               |                                   |                                      |                                      | 0.8                                |
| Std. deviation for $ \Delta_{\text{int}}^{\text{A,B}} $ |        |                               |                                   |                                      |                                      | 0.7                                |

**Table S96.** Using the CCSD/BBC1 data as a reference, analysis of relative errors  $\Delta_{cl}^{A,B}$  in the classical term  $V_{cl}^{A,B}$  of interaction energies computed at B3LYP-GD3 for distant H,H atom-pairs in all conformers of glycol (values in kcal mol<sup>-1</sup>).

| <b>H...H in LEC</b>                      |               | <b>CCSD/BBC1</b> |                    | <b>B3LYP-GD3</b>      |                       |                     |
|------------------------------------------|---------------|------------------|--------------------|-----------------------|-----------------------|---------------------|
| <b>Atom A</b>                            | <b>Atom B</b> | $V_{cl}^{A,B}$   | $V_{cl}^{A,B} / E$ | Comput $V_{cl}^{A,B}$ | Expect $V_{cl}^{A,B}$ | $\Delta_{cl}^{A,B}$ |
| H5                                       | H6            | 37.09            | -2.57280E-04       | 35.98                 | 37.18                 | -1.20               |
| H5                                       | H7            | -1.73            | 1.19752E-05        | 0.11                  | -1.73                 | 1.84                |
| H5                                       | H8            | -0.59            | 4.11552E-06        | 0.44                  | -0.59                 | 1.04                |
| H5                                       | H9            | -2.11            | 1.46141E-05        | -0.39                 | -2.11                 | 1.72                |
| H5                                       | H10           | -1.71            | 1.18685E-05        | -0.52                 | -1.72                 | 1.20                |
| H6                                       | H7            | -1.70            | 1.17605E-05        | -0.25                 | -1.70                 | 1.45                |
| H6                                       | H8            | -0.08            | 5.40273E-07        | 1.47                  | -0.08                 | 1.55                |
| H6                                       | H9            | -1.41            | 9.76436E-06        | -0.25                 | -1.41                 | 1.16                |
| H6                                       | H10           | -1.38            | 9.58579E-06        | 0.45                  | -1.39                 | 1.84                |
| H7                                       | H8            | 0.20             | -1.38967E-06       | 0.16                  | 0.20                  | -0.04               |
| H7                                       | H9            | 0.69             | -4.78518E-06       | 0.73                  | 0.69                  | 0.04                |
| H7                                       | H10           | 0.08             | -5.50299E-07       | 0.06                  | 0.08                  | -0.02               |
| H8                                       | H9            | 0.26             | -1.82468E-06       | 0.18                  | 0.26                  | -0.09               |
| H8                                       | H10           | 0.67             | -4.65740E-06       | 0.79                  | 0.67                  | 0.11                |
| H9                                       | H10           | 0.30             | -2.06546E-06       | 0.18                  | 0.30                  | -0.12               |
| Average for $ \Delta_{cl}^{A,B} $        |               |                  |                    |                       |                       | 0.9                 |
| Std. deviation for $ \Delta_{cl}^{A,B} $ |               |                  |                    |                       |                       | 0.7                 |

  

| <b>H...H in Linear</b>                   |               | <b>CCSD/BBC1</b> |                    | <b>B3LYP-GD3</b>      |                       |                     |
|------------------------------------------|---------------|------------------|--------------------|-----------------------|-----------------------|---------------------|
| <b>Atom A</b>                            | <b>Atom B</b> | $V_{cl}^{A,B}$   | $V_{cl}^{A,B} / E$ | Comput $V_{cl}^{A,B}$ | Expect $V_{cl}^{A,B}$ | $\Delta_{cl}^{A,B}$ |
| H5                                       | H6            | 22.91            | -1.58934E-04       | 22.59                 | 22.97                 | -0.37               |
| H5                                       | H7            | -1.74            | 1.20370E-05        | 0.03                  | -1.74                 | 1.77                |
| H5                                       | H8            | -1.78            | 1.23721E-05        | -0.61                 | -1.79                 | 1.18                |
| H5                                       | H9            | -1.74            | 1.20370E-05        | 0.03                  | -1.74                 | 1.77                |
| H5                                       | H10           | -1.78            | 1.23721E-05        | -0.61                 | -1.79                 | 1.18                |
| H6                                       | H7            | -1.78            | 1.23721E-05        | -0.61                 | -1.79                 | 1.18                |
| H6                                       | H8            | -1.74            | 1.20370E-05        | 0.03                  | -1.74                 | 1.77                |
| H6                                       | H9            | -1.78            | 1.23721E-05        | -0.61                 | -1.79                 | 1.18                |
| H6                                       | H10           | -1.74            | 1.20370E-05        | 0.03                  | -1.74                 | 1.77                |
| H7                                       | H8            | 0.08             | -5.35901E-07       | 0.06                  | 0.08                  | -0.02               |
| H7                                       | H9            | 0.67             | -4.65362E-06       | 0.75                  | 0.67                  | 0.08                |
| H7                                       | H10           | 0.21             | -1.46599E-06       | 0.15                  | 0.21                  | -0.06               |
| H8                                       | H9            | 0.21             | -1.46599E-06       | 0.15                  | 0.21                  | -0.06               |
| H8                                       | H10           | 0.67             | -4.65362E-06       | 0.75                  | 0.67                  | 0.08                |
| H9                                       | H10           | 0.08             | -5.35901E-07       | 0.06                  | 0.08                  | -0.02               |
| Average for $ \Delta_{cl}^{A,B} $        |               |                  |                    |                       |                       | 0.8                 |
| Std. deviation for $ \Delta_{cl}^{A,B} $ |               |                  |                    |                       |                       | 0.7                 |



| H...H in Eclipsed                        |        | CCSD/BBC1      |                    | B3LYP-GD3             |                       |                     |
|------------------------------------------|--------|----------------|--------------------|-----------------------|-----------------------|---------------------|
| Atom A                                   | Atom B | $V_{cl}^{A,B}$ | $V_{cl}^{A,B} / E$ | Comput $V_{cl}^{A,B}$ | Expect $V_{cl}^{A,B}$ | $\Delta_{cl}^{A,B}$ |
| H5                                       | H6     | 26.14          | -1.81338E-04       | 25.85                 | 26.20                 | -0.35               |
| H5                                       | H7     | -3.23          | 2.23898E-05        | -1.45                 | -3.24                 | 1.79                |
| H5                                       | H8     | -2.19          | 1.52172E-05        | -1.17                 | -2.20                 | 1.03                |
| H5                                       | H9     | -3.23          | 2.23898E-05        | -1.45                 | -3.24                 | 1.79                |
| H5                                       | H10    | -2.19          | 1.52172E-05        | -1.17                 | -2.20                 | 1.03                |
| H6                                       | H7     | -2.19          | 1.52172E-05        | -1.17                 | -2.20                 | 1.03                |
| H6                                       | H8     | -3.23          | 2.23898E-05        | -1.45                 | -3.24                 | 1.79                |
| H6                                       | H9     | -2.19          | 1.52172E-05        | -1.17                 | -2.20                 | 1.03                |
| H6                                       | H10    | -3.23          | 2.23898E-05        | -1.45                 | -3.24                 | 1.79                |
| H7                                       | H8     | 0.58           | -3.99386E-06       | 0.36                  | 0.58                  | -0.21               |
| H7                                       | H9     | 0.80           | -5.52134E-06       | 0.72                  | 0.80                  | -0.08               |
| H7                                       | H10    | 0.25           | -1.76849E-06       | 0.13                  | 0.26                  | -0.13               |
| H8                                       | H9     | 0.25           | -1.76849E-06       | 0.13                  | 0.26                  | -0.13               |
| H8                                       | H10    | 0.80           | -5.52134E-06       | 0.72                  | 0.80                  | -0.08               |
| H9                                       | H10    | 0.58           | -3.99386E-06       | 0.36                  | 0.58                  | -0.21               |
| Average for $ \Delta_{cl}^{A,B} $        |        |                |                    |                       |                       | 0.8                 |
| Std. deviation for $ \Delta_{cl}^{A,B} $ |        |                |                    |                       |                       | 0.7                 |

**Table S97.** Using the CCSD/BBC1 data as a reference, analysis of relative errors  $\Delta_{XC}^{A,B}$  in the XC-term  $V_{XC}^{A,B}$  of interaction energies computed at B3LYP-GD3 for distant H,H atom-pairs in all conformers of glycol (values in kcal mol<sup>-1</sup>).

| H...H in LEC                             |        | CCSD/BBC1      |                    | B3LYP-GD3             |                       |                     |
|------------------------------------------|--------|----------------|--------------------|-----------------------|-----------------------|---------------------|
| Atom A                                   | Atom B | $V_{XC}^{A,B}$ | $V_{XC}^{A,B} / E$ | Comput $V_{XC}^{A,B}$ | Expect $V_{XC}^{A,B}$ | $\Delta_{XC}^{A,B}$ |
| H5                                       | H6     | -0.12          | 8.35982E-07        | -0.03                 | -0.12                 | 0.09                |
| H5                                       | H7     | -0.18          | 1.24377E-06        | -0.13                 | -0.18                 | 0.05                |
| H5                                       | H8     | -0.06          | 4.25557E-07        | -0.07                 | -0.06                 | -0.01               |
| H5                                       | H9     | -0.09          | 6.28456E-07        | -0.06                 | -0.09                 | 0.03                |
| H5                                       | H10    | -0.08          | 5.21707E-07        | -0.03                 | -0.08                 | 0.05                |
| H6                                       | H7     | -0.09          | 6.16356E-07        | -0.01                 | -0.09                 | 0.08                |
| H6                                       | H8     | -0.35          | 2.41746E-06        | -0.40                 | -0.35                 | -0.05               |
| H6                                       | H9     | -0.09          | 6.11051E-07        | -0.02                 | -0.09                 | 0.07                |
| H6                                       | H10    | -0.14          | 9.65231E-07        | -0.07                 | -0.14                 | 0.07                |
| H7                                       | H8     | -0.62          | 4.30895E-06        | -0.32                 | -0.62                 | 0.30                |
| H7                                       | H9     | -3.01          | 2.08548E-05        | -3.22                 | -3.01                 | -0.20               |
| H7                                       | H10    | -0.63          | 4.34660E-06        | -0.57                 | -0.63                 | 0.06                |
| H8                                       | H9     | -0.59          | 4.06207E-06        | -0.38                 | -0.59                 | 0.21                |
| H8                                       | H10    | -3.05          | 2.11911E-05        | -3.20                 | -3.06                 | -0.14               |
| H9                                       | H10    | -0.55          | 3.81434E-06        | -0.36                 | -0.55                 | 0.20                |
| Average for $ \Delta_{XC}^{A,B} $        |        |                |                    |                       |                       | 0.1                 |
| Std. deviation for $ \Delta_{XC}^{A,B} $ |        |                |                    |                       |                       | 0.1                 |

| H...H in Linear                          |        | CCSD/BBC1      |                    | B3LYP-GD3             |                       |                     |
|------------------------------------------|--------|----------------|--------------------|-----------------------|-----------------------|---------------------|
| Atom A                                   | Atom B | $V_{XC}^{A,B}$ | $V_{XC}^{A,B} / E$ | Comput $V_{XC}^{A,B}$ | Expect $V_{XC}^{A,B}$ | $\Delta_{XC}^{A,B}$ |
| H5                                       | H6     | -0.19          | 1.29892E-06        | -0.01                 | -0.19                 | 0.18                |
| H5                                       | H7     | -0.11          | 7.29610E-07        | -0.10                 | -0.11                 | 0.01                |
| H5                                       | H8     | -0.03          | 2.24489E-07        | -0.02                 | -0.03                 | 0.01                |
| H5                                       | H9     | -0.11          | 7.29610E-07        | -0.10                 | -0.11                 | 0.01                |
| H5                                       | H10    | -0.03          | 2.24489E-07        | -0.02                 | -0.03                 | 0.01                |
| H6                                       | H7     | -0.03          | 2.24489E-07        | -0.02                 | -0.03                 | 0.01                |
| H6                                       | H8     | -0.11          | 7.29610E-07        | -0.10                 | -0.11                 | 0.01                |
| H6                                       | H9     | -0.03          | 2.24489E-07        | -0.02                 | -0.03                 | 0.01                |
| H6                                       | H10    | -0.11          | 7.29610E-07        | -0.10                 | -0.11                 | 0.01                |
| H7                                       | H8     | -0.64          | 4.45753E-06        | -0.54                 | -0.64                 | 0.10                |
| H7                                       | H9     | -3.18          | 2.20515E-05        | -3.28                 | -3.19                 | -0.09               |
| H7                                       | H10    | -0.67          | 4.65732E-06        | -0.35                 | -0.67                 | 0.32                |
| H8                                       | H9     | -0.67          | 4.65732E-06        | -0.35                 | -0.67                 | 0.32                |
| H8                                       | H10    | -3.18          | 2.20515E-05        | -3.28                 | -3.19                 | -0.09               |
| H9                                       | H10    | -0.64          | 4.45753E-06        | -0.54                 | -0.64                 | 0.10                |
| Average for $ \Delta_{XC}^{A,B} $        |        |                |                    |                       |                       | 0.1                 |
| Std. deviation for $ \Delta_{XC}^{A,B} $ |        |                |                    |                       |                       | 0.1                 |

| H...H in Eclipsed                        |        | CCSD/BBC1      |                    | B3LYP-GD3             |                       |                     |
|------------------------------------------|--------|----------------|--------------------|-----------------------|-----------------------|---------------------|
| Atom A                                   | Atom B | $V_{XC}^{A,B}$ | $V_{XC}^{A,B} / E$ | Comput $V_{XC}^{A,B}$ | Expect $V_{XC}^{A,B}$ | $\Delta_{XC}^{A,B}$ |
| H5                                       | H6     | -0.20          | 1.40935E-06        | -0.01                 | -0.20                 | 0.20                |
| H5                                       | H7     | -0.14          | 9.61846E-07        | -0.11                 | -0.14                 | 0.03                |
| H5                                       | H8     | -0.04          | 2.46282E-07        | -0.02                 | -0.04                 | 0.01                |
| H5                                       | H9     | -0.14          | 9.61846E-07        | -0.11                 | -0.14                 | 0.03                |
| H5                                       | H10    | -0.04          | 2.46282E-07        | -0.02                 | -0.04                 | 0.01                |
| H6                                       | H7     | -0.04          | 2.46282E-07        | -0.02                 | -0.04                 | 0.01                |
| H6                                       | H8     | -0.14          | 9.61846E-07        | -0.11                 | -0.14                 | 0.03                |
| H6                                       | H9     | -0.04          | 2.46282E-07        | -0.02                 | -0.04                 | 0.01                |
| H6                                       | H10    | -0.14          | 9.61846E-07        | -0.11                 | -0.14                 | 0.03                |
| H7                                       | H8     | -1.46          | 1.01248E-05        | -1.07                 | -1.46                 | 0.40                |
| H7                                       | H9     | -3.45          | 2.39035E-05        | -3.56                 | -3.45                 | -0.11               |
| H7                                       | H10    | -0.51          | 3.53135E-06        | -0.27                 | -0.51                 | 0.24                |
| H8                                       | H9     | -0.51          | 3.53135E-06        | -0.27                 | -0.51                 | 0.24                |
| H8                                       | H10    | -3.45          | 2.39035E-05        | -3.56                 | -3.45                 | -0.11               |
| H9                                       | H10    | -1.46          | 1.01248E-05        | -1.07                 | -1.46                 | 0.40                |
| Average for $ \Delta_{XC}^{A,B} $        |        |                |                    |                       |                       | 0.1                 |
| Std. deviation for $ \Delta_{XC}^{A,B} $ |        |                |                    |                       |                       | 0.1                 |

**Table S98.** Using the CCSD/BBC1 data as a reference, analysis of relative errors  $\Delta_{\text{int}}^{\text{A,B}}$  of interaction energies  $E_{\text{int}}^{\text{A,B}}$  computed at MP2/Müller for distant C,H atom-pairs in all conformers of glycol (values in kcal mol<sup>-1</sup>).

| <b>C...H in LEC</b>                                     |               | <b>CCSD/BBC1</b>              |                                   | <b>MP2/Müller</b>                    |                                      |                                    |
|---------------------------------------------------------|---------------|-------------------------------|-----------------------------------|--------------------------------------|--------------------------------------|------------------------------------|
| <b>Atom A</b>                                           | <b>Atom B</b> | $E_{\text{int}}^{\text{A,B}}$ | $E_{\text{int}}^{\text{A,B}} / E$ | Comput $E_{\text{int}}^{\text{A,B}}$ | Expect $E_{\text{int}}^{\text{A,B}}$ | $\Delta_{\text{int}}^{\text{A,B}}$ |
| C1                                                      | H5            | 80.84                         | -5.60847E-04                      | 78.56                                | 80.83                                | -2.28                              |
| C1                                                      | H6            | 34.65                         | -2.40395E-04                      | 33.43                                | 34.65                                | -1.21                              |
| C1                                                      | H8            | -4.93                         | 3.41684E-05                       | -2.72                                | -4.92                                | 2.20                               |
| C1                                                      | H10           | -4.93                         | 3.41684E-05                       | -2.73                                | -4.92                                | 2.20                               |
| C2                                                      | H5            | 34.65                         | -2.40395E-04                      | 33.43                                | 34.65                                | -1.21                              |
| C2                                                      | H6            | 80.84                         | -5.60847E-04                      | 78.56                                | 80.83                                | -2.28                              |
| C2                                                      | H7            | -4.93                         | 3.41684E-05                       | -2.72                                | -4.92                                | 2.20                               |
| C2                                                      | H9            | -4.93                         | 3.41684E-05                       | -2.73                                | -4.92                                | 2.20                               |
| Average for $ \Delta_{\text{int}}^{\text{A,B}} $        |               |                               |                                   |                                      |                                      | 2.0                                |
| Std. deviation for $ \Delta_{\text{int}}^{\text{A,B}} $ |               |                               |                                   |                                      |                                      | 0.5                                |

  

| <b>C...H in Linear</b>                                  |               | <b>CCSD/BBC1</b>              |                                   | <b>MP2/Müller</b>                    |                                      |                                    |
|---------------------------------------------------------|---------------|-------------------------------|-----------------------------------|--------------------------------------|--------------------------------------|------------------------------------|
| <b>Atom A</b>                                           | <b>Atom B</b> | $E_{\text{int}}^{\text{A,B}}$ | $E_{\text{int}}^{\text{A,B}} / E$ | Comput $E_{\text{int}}^{\text{A,B}}$ | Expect $E_{\text{int}}^{\text{A,B}}$ | $\Delta_{\text{int}}^{\text{A,B}}$ |
| C1                                                      | H5            | 78.29                         | -5.43115E-04                      | 75.67                                | 78.28                                | -2.61                              |
| C1                                                      | H6            | 47.76                         | -3.31314E-04                      | 46.59                                | 47.75                                | -1.16                              |
| C1                                                      | H8            | -3.92                         | 2.72198E-05                       | -2.16                                | -3.92                                | 1.76                               |
| C1                                                      | H10           | -5.06                         | 3.50861E-05                       | -3.10                                | -5.06                                | 1.96                               |
| C2                                                      | H5            | 38.67                         | -2.68255E-04                      | 37.44                                | 38.66                                | -1.22                              |
| C2                                                      | H6            | 85.16                         | -5.90764E-04                      | 83.19                                | 85.14                                | -1.96                              |
| C2                                                      | H7            | -4.58                         | 3.17769E-05                       | -2.34                                | -4.58                                | 2.24                               |
| C2                                                      | H9            | -5.06                         | 3.51173E-05                       | -3.20                                | -5.06                                | 1.86                               |
| Average for $ \Delta_{\text{int}}^{\text{A,B}} $        |               |                               |                                   |                                      |                                      | 1.8                                |
| Std. deviation for $ \Delta_{\text{int}}^{\text{A,B}} $ |               |                               |                                   |                                      |                                      | 0.5                                |

  

| <b>C...H in Eclipsed</b>                                |               | <b>CCSD/BBC1</b>              |                                   | <b>MP2/Müller</b>                    |                                      |                                    |
|---------------------------------------------------------|---------------|-------------------------------|-----------------------------------|--------------------------------------|--------------------------------------|------------------------------------|
| <b>Atom A</b>                                           | <b>Atom B</b> | $E_{\text{int}}^{\text{A,B}}$ | $E_{\text{int}}^{\text{A,B}} / E$ | Comput $E_{\text{int}}^{\text{A,B}}$ | Expect $E_{\text{int}}^{\text{A,B}}$ | $\Delta_{\text{int}}^{\text{A,B}}$ |
| C1                                                      | H5            | 82.40                         | -5.71696E-04                      | 80.28                                | 82.39                                | -2.11                              |
| C1                                                      | H6            | 37.71                         | -2.61656E-04                      | 36.74                                | 37.71                                | -0.97                              |
| C1                                                      | H8            | -6.60                         | 4.58093E-05                       | -4.44                                | -6.60                                | 2.16                               |
| C1                                                      | H10           | -6.60                         | 4.58093E-05                       | -4.44                                | -6.60                                | 2.16                               |
| C2                                                      | H5            | 37.71                         | -2.61656E-04                      | 36.73                                | 37.71                                | -0.98                              |
| C2                                                      | H6            | 82.40                         | -5.71696E-04                      | 80.29                                | 82.39                                | -2.10                              |
| C2                                                      | H7            | -6.60                         | 4.58093E-05                       | -4.44                                | -6.60                                | 2.16                               |
| C2                                                      | H9            | -6.60                         | 4.58093E-05                       | -4.44                                | -6.60                                | 2.16                               |
| Average for $ \Delta_{\text{int}}^{\text{A,B}} $        |               |                               |                                   |                                      |                                      | 1.8                                |
| Std. deviation for $ \Delta_{\text{int}}^{\text{A,B}} $ |               |                               |                                   |                                      |                                      | 0.5                                |

**Table S99.** Using the CCSD/BBC1 data as a reference, analysis of relative errors  $\Delta_{cl}^{A,B}$  in the classical component  $V_{cl}^{A,B}$  of interaction energies computed at MP2/Müller for distant C,H atom-pairs in all conformers of glycol (values in kcal mol<sup>-1</sup>).

| <b>C...H in LEC</b>                      |               | <b>CCSD/BBC1</b> |                    | <b>MP2/Müller</b>     |                       |                     |
|------------------------------------------|---------------|------------------|--------------------|-----------------------|-----------------------|---------------------|
| <b>Atom A</b>                            | <b>Atom B</b> | $V_{cl}^{A,B}$   | $V_{cl}^{A,B} / E$ | Comput $V_{cl}^{A,B}$ | Expect $V_{cl}^{A,B}$ | $\Delta_{cl}^{A,B}$ |
| C1                                       | H5            | 79.50            | -5.51515E-04       | 76.67                 | 79.49                 | -2.82               |
| C1                                       | H6            | 48.29            | -3.35024E-04       | 46.77                 | 48.29                 | -1.51               |
| C1                                       | H8            | 0.12             | -8.38500E-07       | 1.38                  | 0.12                  | 1.26                |
| C1                                       | H10           | -1.10            | 7.61256E-06        | 0.27                  | -1.10                 | 1.37                |
| C2                                       | H5            | 39.11            | -2.71330E-04       | 37.72                 | 39.11                 | -1.39               |
| C2                                       | H6            | 86.47            | -5.99872E-04       | 84.14                 | 86.46                 | -2.32               |
| C2                                       | H7            | -0.83            | 5.78789E-06        | 0.72                  | -0.83                 | 1.55                |
| C2                                       | H9            | -1.27            | 8.79525E-06        | 0.12                  | -1.27                 | 1.39                |
| Average for $ \Delta_{cl}^{A,B} $        |               |                  |                    |                       |                       | 1.7                 |
| Std. deviation for $ \Delta_{cl}^{A,B} $ |               |                  |                    |                       |                       | 0.6                 |

  

| <b>C...H in Linear</b>                   |               | <b>CCSD/BBC1</b> |                    | <b>MP2/Müller</b>     |                       |                     |
|------------------------------------------|---------------|------------------|--------------------|-----------------------|-----------------------|---------------------|
| <b>Atom A</b>                            | <b>Atom B</b> | $V_{cl}^{A,B}$   | $V_{cl}^{A,B} / E$ | Comput $V_{cl}^{A,B}$ | Expect $V_{cl}^{A,B}$ | $\Delta_{cl}^{A,B}$ |
| C1                                       | H5            | 82.17            | -5.70019E-04       | 79.58                 | 82.15                 | -2.57               |
| C1                                       | H6            | 35.15            | -2.43847E-04       | 33.72                 | 35.14                 | -1.42               |
| C1                                       | H8            | -1.14            | 7.88614E-06        | 0.33                  | -1.14                 | 1.47                |
| C1                                       | H10           | -1.14            | 7.88614E-06        | 0.33                  | -1.14                 | 1.47                |
| C2                                       | H5            | 35.15            | -2.43847E-04       | 33.72                 | 35.14                 | -1.42               |
| C2                                       | H6            | 82.17            | -5.70019E-04       | 79.58                 | 82.15                 | -2.57               |
| C2                                       | H7            | -1.14            | 7.88614E-06        | 0.33                  | -1.14                 | 1.47                |
| C2                                       | H9            | -1.14            | 7.88614E-06        | 0.33                  | -1.14                 | 1.47                |
| Average for $ \Delta_{cl}^{A,B} $        |               |                  |                    |                       |                       | 1.7                 |
| Std. deviation for $ \Delta_{cl}^{A,B} $ |               |                  |                    |                       |                       | 0.5                 |

  

| <b>C...H in Eclipsed</b>                 |               | <b>CCSD/BBC1</b> |                    | <b>MP2/Müller</b>     |                       |                     |
|------------------------------------------|---------------|------------------|--------------------|-----------------------|-----------------------|---------------------|
| <b>Atom A</b>                            | <b>Atom B</b> | $V_{cl}^{A,B}$   | $V_{cl}^{A,B} / E$ | Comput $V_{cl}^{A,B}$ | Expect $V_{cl}^{A,B}$ | $\Delta_{cl}^{A,B}$ |
| C1                                       | H5            | 83.83            | -5.81584E-04       | 81.40                 | 83.81                 | -2.41               |
| C1                                       | H6            | 38.20            | -2.65018E-04       | 37.01                 | 38.19                 | -1.19               |
| C1                                       | H8            | -2.54            | 1.76089E-05        | -1.10                 | -2.54                 | 1.43                |
| C1                                       | H10           | -2.54            | 1.76089E-05        | -1.10                 | -2.54                 | 1.43                |
| C2                                       | H5            | 38.20            | -2.65018E-04       | 36.99                 | 38.19                 | -1.20               |
| C2                                       | H6            | 83.83            | -5.81584E-04       | 81.41                 | 83.81                 | -2.40               |
| C2                                       | H7            | -2.54            | 1.76089E-05        | -1.11                 | -2.54                 | 1.43                |
| C2                                       | H9            | -2.54            | 1.76089E-05        | -1.10                 | -2.54                 | 1.43                |
| Average for $ \Delta_{cl}^{A,B} $        |               |                  |                    |                       |                       | 1.6                 |
| Std. deviation for $ \Delta_{cl}^{A,B} $ |               |                  |                    |                       |                       | 0.5                 |

**Table S100.** Using the CCSD/BBC1 data as a reference, analysis of relative errors  $\Delta_{XC}^{A,B}$  in the XC-term  $V_{XC}^{A,B}$  of interaction energies computed at MP2/Müller for distant C,H atom-pairs in all conformers of glycol (values in kcal mol<sup>-1</sup>).

| <b>C...H in LEC</b>                      |               | <b>CCSD/BBC1</b> |                    | <b>MP2/Müller</b>     |                       |                     |
|------------------------------------------|---------------|------------------|--------------------|-----------------------|-----------------------|---------------------|
| <b>Atom A</b>                            | <b>Atom B</b> | $V_{XC}^{A,B}$   | $V_{XC}^{A,B} / E$ | Comput $V_{XC}^{A,B}$ | Expect $V_{XC}^{A,B}$ | $\Delta_{XC}^{A,B}$ |
| C1                                       | H5            | -1.21            | 8.40036E-06        | -1.00                 | -1.21                 | 0.21                |
| C1                                       | H6            | -0.53            | 3.70975E-06        | -0.18                 | -0.53                 | 0.36                |
| C1                                       | H8            | -4.04            | 2.80583E-05        | -3.54                 | -4.04                 | 0.50                |
| C1                                       | H10           | -3.96            | 2.74736E-05        | -3.38                 | -3.96                 | 0.58                |
| C2                                       | H5            | -0.44            | 3.07551E-06        | -0.28                 | -0.44                 | 0.16                |
| C2                                       | H6            | -1.31            | 9.10774E-06        | -0.95                 | -1.31                 | 0.37                |
| C2                                       | H7            | -3.75            | 2.59890E-05        | -3.06                 | -3.75                 | 0.69                |
| C2                                       | H9            | -3.79            | 2.63220E-05        | -3.32                 | -3.79                 | 0.47                |
| Average for $ \Delta_{XC}^{A,B} $        |               |                  |                    |                       |                       | 0.42                |
| Std. deviation for $ \Delta_{XC}^{A,B} $ |               |                  |                    |                       |                       | 0.18                |

  

| <b>C...H in Linear</b>                   |               | <b>CCSD/BBC1</b> |                    | <b>MP2/Müller</b>     |                       |                     |
|------------------------------------------|---------------|------------------|--------------------|-----------------------|-----------------------|---------------------|
| <b>Atom A</b>                            | <b>Atom B</b> | $V_{XC}^{A,B}$   | $V_{XC}^{A,B} / E$ | Comput $V_{XC}^{A,B}$ | Expect $V_{XC}^{A,B}$ | $\Delta_{XC}^{A,B}$ |
| C1                                       | H5            | -1.32            | 9.17191E-06        | -1.02                 | -1.32                 | 0.30                |
| C1                                       | H6            | -0.50            | 3.45234E-06        | -0.29                 | -0.50                 | 0.21                |
| C1                                       | H8            | -3.79            | 2.62822E-05        | -3.06                 | -3.79                 | 0.73                |
| C1                                       | H10           | -3.79            | 2.62822E-05        | -3.06                 | -3.79                 | 0.73                |
| C2                                       | H5            | -0.50            | 3.45234E-06        | -0.29                 | -0.50                 | 0.21                |
| C2                                       | H6            | -1.32            | 9.17191E-06        | -1.02                 | -1.32                 | 0.30                |
| C2                                       | H7            | -3.79            | 2.62822E-05        | -3.06                 | -3.79                 | 0.73                |
| C2                                       | H9            | -3.79            | 2.62822E-05        | -3.06                 | -3.79                 | 0.73                |
| Average for $ \Delta_{XC}^{A,B} $        |               |                  |                    |                       |                       | 0.5                 |
| Std. deviation for $ \Delta_{XC}^{A,B} $ |               |                  |                    |                       |                       | 0.3                 |

  

| <b>C...H in Eclipsed</b>                 |               | <b>CCSD/BBC1</b> |                    | <b>MP2/Müller</b>     |                       |                     |
|------------------------------------------|---------------|------------------|--------------------|-----------------------|-----------------------|---------------------|
| <b>Atom A</b>                            | <b>Atom B</b> | $V_{XC}^{A,B}$   | $V_{XC}^{A,B} / E$ | Comput $V_{XC}^{A,B}$ | Expect $V_{XC}^{A,B}$ | $\Delta_{XC}^{A,B}$ |
| C1                                       | H5            | -1.43            | 9.88825E-06        | -1.12                 | -1.43                 | 0.30                |
| C1                                       | H6            | -0.48            | 3.36254E-06        | -0.26                 | -0.48                 | 0.22                |
| C1                                       | H8            | -4.06            | 2.82004E-05        | -3.34                 | -4.06                 | 0.73                |
| C1                                       | H10           | -4.06            | 2.82004E-05        | -3.34                 | -4.06                 | 0.73                |
| C2                                       | H5            | -0.48            | 3.36254E-06        | -0.26                 | -0.48                 | 0.22                |
| C2                                       | H6            | -1.43            | 9.88825E-06        | -1.12                 | -1.43                 | 0.31                |
| C2                                       | H7            | -4.06            | 2.82004E-05        | -3.33                 | -4.06                 | 0.73                |
| C2                                       | H9            | -4.06            | 2.82004E-05        | -3.34                 | -4.06                 | 0.73                |
| Average for $ \Delta_{XC}^{A,B} $        |               |                  |                    |                       |                       | 0.5                 |
| Std. deviation for $ \Delta_{XC}^{A,B} $ |               |                  |                    |                       |                       | 0.3                 |

**Table S101.** Using the CCSD/BBC1 data as a reference, analysis of relative errors  $\Delta_{\text{int}}^{\text{A,B}}$  in interaction energies  $E_{\text{int}}^{\text{A,B}}$  computed at MP2/Müller for distant O,H atom-pairs in all conformers of glycol (values in kcal mol<sup>-1</sup>).

| O...H in LEC                                            |        | CCSD/BBC1                     |                                   | MP2/Müller                           |                                      |                                    |
|---------------------------------------------------------|--------|-------------------------------|-----------------------------------|--------------------------------------|--------------------------------------|------------------------------------|
| Atom A                                                  | Atom B | $E_{\text{int}}^{\text{A,B}}$ | $E_{\text{int}}^{\text{A,B}} / E$ | Comput $E_{\text{int}}^{\text{A,B}}$ | Expect $E_{\text{int}}^{\text{A,B}}$ | $\Delta_{\text{int}}^{\text{A,B}}$ |
| O3                                                      | H5     | -63.47                        | 4.40340E-04                       | -64.64                               | -63.46                               | -1.17                              |
| O3                                                      | H7     | 1.53                          | -1.05919E-05                      | -0.07                                | 1.53                                 | -1.60                              |
| O3                                                      | H8     | -6.44                         | 4.46864E-05                       | -8.69                                | -6.44                                | -2.25                              |
| O3                                                      | H9     | 1.74                          | -1.20837E-05                      | 0.56                                 | 1.74                                 | -1.18                              |
| O3                                                      | H10    | -4.72                         | 3.27422E-05                       | -6.95                                | -4.72                                | -2.23                              |
| O4                                                      | H6     | -90.89                        | 6.30517E-04                       | -92.95                               | -90.87                               | -2.08                              |
| O4                                                      | H7     | -4.46                         | 3.09496E-05                       | -6.83                                | -4.46                                | -2.37                              |
| O4                                                      | H8     | 0.02                          | -1.51058E-07                      | -1.28                                | 0.02                                 | -1.30                              |
| O4                                                      | H9     | -3.22                         | 2.23074E-05                       | -5.36                                | -3.22                                | -2.15                              |
| O4                                                      | H10    | 1.98                          | -1.37476E-05                      | 0.44                                 | 1.98                                 | -1.54                              |
| Average for $ \Delta_{\text{int}}^{\text{A,B}} $        |        |                               |                                   |                                      |                                      | 1.8                                |
| Std. deviation for $ \Delta_{\text{int}}^{\text{A,B}} $ |        |                               |                                   |                                      |                                      | 0.5                                |

| O...H in Linear                                         |        | CCSD/BBC1                     |                                   | MP2/Müller                           |                                      |                                    |
|---------------------------------------------------------|--------|-------------------------------|-----------------------------------|--------------------------------------|--------------------------------------|------------------------------------|
| Atom A                                                  | Atom B | $E_{\text{int}}^{\text{A,B}}$ | $E_{\text{int}}^{\text{A,B}} / E$ | Comput $E_{\text{int}}^{\text{A,B}}$ | Expect $E_{\text{int}}^{\text{A,B}}$ | $\Delta_{\text{int}}^{\text{A,B}}$ |
| O3                                                      | H5     | -50.37                        | 3.49449E-04                       | -50.77                               | -50.36                               | -0.40                              |
| O3                                                      | H7     | 2.11                          | -1.46101E-05                      | 0.65                                 | 2.11                                 | -1.46                              |
| O3                                                      | H8     | -3.97                         | 2.75121E-05                       | -6.28                                | -3.97                                | -2.32                              |
| O3                                                      | H9     | 2.11                          | -1.46101E-05                      | 0.65                                 | 2.11                                 | -1.46                              |
| O3                                                      | H10    | -3.97                         | 2.75121E-05                       | -6.29                                | -3.97                                | -2.32                              |
| O4                                                      | H6     | -50.37                        | 3.49449E-04                       | -50.77                               | -50.36                               | -0.40                              |
| O4                                                      | H7     | -3.97                         | 2.75121E-05                       | -6.28                                | -3.97                                | -2.32                              |
| O4                                                      | H8     | 2.11                          | -1.46101E-05                      | 0.65                                 | 2.11                                 | -1.46                              |
| O4                                                      | H9     | -3.97                         | 2.75121E-05                       | -6.29                                | -3.97                                | -2.32                              |
| O4                                                      | H10    | 2.11                          | -1.46101E-05                      | 0.65                                 | 2.11                                 | -1.46                              |
| Average for $ \Delta_{\text{int}}^{\text{A,B}} $        |        |                               |                                   |                                      |                                      | 1.6                                |
| Std. deviation for $ \Delta_{\text{int}}^{\text{A,B}} $ |        |                               |                                   |                                      |                                      | 0.7                                |

| O...H in Eclipsed                                       |        | CCSD/BBC1                     |                                   | MP2/Müller                           |                                      |                                    |
|---------------------------------------------------------|--------|-------------------------------|-----------------------------------|--------------------------------------|--------------------------------------|------------------------------------|
| Atom A                                                  | Atom B | $E_{\text{int}}^{\text{A,B}}$ | $E_{\text{int}}^{\text{A,B}} / E$ | Comput $E_{\text{int}}^{\text{A,B}}$ | Expect $E_{\text{int}}^{\text{A,B}}$ | $\Delta_{\text{int}}^{\text{A,B}}$ |
| O3                                                      | H5     | -59.43                        | 4.12334E-04                       | -60.00                               | -59.42                               | -0.58                              |
| O3                                                      | H7     | 3.69                          | -2.56299E-05                      | 2.67                                 | 3.69                                 | -1.02                              |
| O3                                                      | H8     | -1.45                         | 1.00861E-05                       | -3.64                                | -1.45                                | -2.19                              |
| O3                                                      | H9     | 3.69                          | -2.56299E-05                      | 2.67                                 | 3.69                                 | -1.02                              |
| O3                                                      | H10    | -1.45                         | 1.00861E-05                       | -3.64                                | -1.45                                | -2.18                              |
| O4                                                      | H6     | -59.43                        | 4.12334E-04                       | -60.00                               | -59.42                               | -0.57                              |
| O4                                                      | H7     | -1.45                         | 1.00861E-05                       | -3.64                                | -1.45                                | -2.18                              |
| O4                                                      | H8     | 3.69                          | -2.56299E-05                      | 2.67                                 | 3.69                                 | -1.02                              |
| O4                                                      | H9     | -1.45                         | 1.00861E-05                       | -3.64                                | -1.45                                | -2.18                              |
| O4                                                      | H10    | 3.69                          | -2.56299E-05                      | 2.67                                 | 3.69                                 | -1.02                              |
| Average for $ \Delta_{\text{int}}^{\text{A,B}} $        |        |                               |                                   |                                      |                                      | 1.4                                |
| Std. deviation for $ \Delta_{\text{int}}^{\text{A,B}} $ |        |                               |                                   |                                      |                                      | 0.7                                |

**Table S102.** Using the CCSD/BBC1 data as a reference, analysis of relative errors  $\Delta_{\text{cl}}^{\text{A,B}}$  in the classical term  $V_{\text{cl}}^{\text{A,B}}$  of interaction energies computed at MP2/Müller for distant O,H atom-pairs in all conformers of glycol (values in kcal mol<sup>-1</sup>).

| O...H in LEC                                           |        | CCSD/BBC1                    |                                  | MP2/Müller                          |                                     |                                   |
|--------------------------------------------------------|--------|------------------------------|----------------------------------|-------------------------------------|-------------------------------------|-----------------------------------|
| Atom A                                                 | Atom B | $V_{\text{cl}}^{\text{A,B}}$ | $V_{\text{cl}}^{\text{A,B}} / E$ | Comput $V_{\text{cl}}^{\text{A,B}}$ | Expect $V_{\text{cl}}^{\text{A,B}}$ | $\Delta_{\text{cl}}^{\text{A,B}}$ |
| O3                                                     | H5     | 79.50                        | -5.51515E-04                     | 76.67                               | 79.49                               | -2.82                             |
| O3                                                     | H7     | 48.29                        | -3.35024E-04                     | 46.77                               | 48.29                               | -1.51                             |
| O3                                                     | H8     | 0.12                         | -8.38500E-07                     | 1.38                                | 0.12                                | 1.26                              |
| O3                                                     | H9     | -1.10                        | 7.61256E-06                      | 0.27                                | -1.10                               | 1.37                              |
| O3                                                     | H10    | 39.11                        | -2.71330E-04                     | 37.72                               | 39.11                               | -1.39                             |
| O4                                                     | H6     | 86.47                        | -5.99872E-04                     | 84.14                               | 86.46                               | -2.32                             |
| O4                                                     | H7     | -0.83                        | 5.78789E-06                      | 0.72                                | -0.83                               | 1.55                              |
| O4                                                     | H8     | -1.27                        | 8.79525E-06                      | 0.12                                | -1.27                               | 1.39                              |
| O4                                                     | H9     | 79.50                        | -5.51515E-04                     | 76.67                               | 79.49                               | -2.82                             |
| O4                                                     | H10    | 48.29                        | -3.35024E-04                     | 46.77                               | 48.29                               | -1.51                             |
| Average for $ \Delta_{\text{cl}}^{\text{A,B}} $        |        |                              |                                  |                                     |                                     | 1.7                               |
| Std. deviation for $ \Delta_{\text{cl}}^{\text{A,B}} $ |        |                              |                                  |                                     |                                     | 0.6                               |

| O...H in Linear                          |        | CCSD/BBC1      |                    | MP2/Müller            |                       |                     |
|------------------------------------------|--------|----------------|--------------------|-----------------------|-----------------------|---------------------|
| Atom A                                   | Atom B | $V_{cl}^{A,B}$ | $V_{cl}^{A,B} / E$ | Comput $V_{cl}^{A,B}$ | Expect $V_{cl}^{A,B}$ | $\Delta_{cl}^{A,B}$ |
| O3                                       | H5     | -49.87         | 3.45955E-04        | -50.71                | -49.86                | -0.86               |
| O3                                       | H7     | 4.07           | -2.82240E-05       | 2.18                  | 4.07                  | -1.88               |
| O3                                       | H8     | 2.14           | -1.48185E-05       | -0.42                 | 2.14                  | -2.55               |
| O3                                       | H9     | 4.07           | -2.82240E-05       | 2.18                  | 4.07                  | -1.89               |
| O3                                       | H10    | 2.14           | -1.48185E-05       | -0.42                 | 2.14                  | -2.56               |
| O4                                       | H6     | -49.87         | 3.45955E-04        | -50.71                | -49.86                | -0.86               |
| O4                                       | H7     | 2.14           | -1.48185E-05       | -0.42                 | 2.14                  | -2.55               |
| O4                                       | H8     | 4.07           | -2.82240E-05       | 2.18                  | 4.07                  | -1.88               |
| O4                                       | H9     | 2.14           | -1.48185E-05       | -0.42                 | 2.14                  | -2.56               |
| O4                                       | H10    | 4.07           | -2.82240E-05       | 2.18                  | 4.07                  | -1.89               |
| Average for $ \Delta_{cl}^{A,B} $        |        |                |                    |                       |                       | 1.9                 |
| Std. deviation for $ \Delta_{cl}^{A,B} $ |        |                |                    |                       |                       | 0.7                 |

| O...H in Eclipsed                        |        | CCSD/BBC1      |                    | MP2/Müller            |                       |                     |
|------------------------------------------|--------|----------------|--------------------|-----------------------|-----------------------|---------------------|
| Atom A                                   | Atom B | $V_{cl}^{A,B}$ | $V_{cl}^{A,B} / E$ | Comput $V_{cl}^{A,B}$ | Expect $V_{cl}^{A,B}$ | $\Delta_{cl}^{A,B}$ |
| O3                                       | H5     | 83.83          | -5.81584E-04       | 81.40                 | 83.81                 | -2.41               |
| O3                                       | H7     | 38.20          | -2.65018E-04       | 37.01                 | 38.19                 | -1.19               |
| O3                                       | H8     | -2.54          | 1.76089E-05        | -1.10                 | -2.54                 | 1.43                |
| O3                                       | H9     | -2.54          | 1.76089E-05        | -1.10                 | -2.54                 | 1.43                |
| O3                                       | H10    | 38.20          | -2.65018E-04       | 36.99                 | 38.19                 | -1.20               |
| O4                                       | H6     | 83.83          | -5.81584E-04       | 81.41                 | 83.81                 | -2.40               |
| O4                                       | H7     | -2.54          | 1.76089E-05        | -1.11                 | -2.54                 | 1.43                |
| O4                                       | H8     | -2.54          | 1.76089E-05        | -1.10                 | -2.54                 | 1.43                |
| O4                                       | H9     | 83.83          | -5.81584E-04       | 81.40                 | 83.81                 | -2.41               |
| O4                                       | H10    | 38.20          | -2.65018E-04       | 37.01                 | 38.19                 | -1.19               |
| Average for $ \Delta_{cl}^{A,B} $        |        |                |                    |                       |                       | 1.6                 |
| Std. deviation for $ \Delta_{cl}^{A,B} $ |        |                |                    |                       |                       | 0.5                 |



**Table S103.** Using the CCSD/BBC1 data as a reference, analysis of relative errors  $\Delta_{XC}^{A,B}$  in the XC-term  $V_{XC}^{A,B}$  of interaction energies computed at MP2/Müller for distant O,H atom-pairs in all conformers of glycol (values in kcal mol<sup>-1</sup>).

| O...H in LEC                             |        | CCSD/BBC1      |                    | MP2/Müller            |                       |                     |
|------------------------------------------|--------|----------------|--------------------|-----------------------|-----------------------|---------------------|
| Atom A                                   | Atom B | $V_{XC}^{A,B}$ | $V_{XC}^{A,B} / E$ | Comput $V_{XC}^{A,B}$ | Expect $V_{XC}^{A,B}$ | $\Delta_{XC}^{A,B}$ |
| O3                                       | H5     | -0.35          | 2.44852E-06        | -0.05                 | -0.35                 | 0.30                |
| O3                                       | H7     | -2.00          | 1.38900E-05        | -1.49                 | -2.00                 | 0.51                |
| O3                                       | H8     | -6.27          | 4.34686E-05        | -5.88                 | -6.26                 | 0.38                |
| O3                                       | H9     | -1.14          | 7.90820E-06        | -0.59                 | -1.14                 | 0.55                |
| O3                                       | H10    | -6.42          | 4.45528E-05        | -5.99                 | -6.42                 | 0.43                |
| O4                                       | H6     | -3.03          | 2.10430E-05        | -2.75                 | -3.03                 | 0.28                |
| O4                                       | H7     | -6.28          | 4.35390E-05        | -5.97                 | -6.28                 | 0.30                |
| O4                                       | H8     | -0.86          | 5.98068E-06        | -0.50                 | -0.86                 | 0.37                |
| O4                                       | H9     | -6.50          | 4.51269E-05        | -5.92                 | -6.50                 | 0.58                |
| O4                                       | H10    | -1.99          | 1.38080E-05        | -1.49                 | -1.99                 | 0.50                |
| Average for $ \Delta_{XC}^{A,B} $        |        |                |                    |                       |                       | 0.4                 |
| Std. deviation for $ \Delta_{XC}^{A,B} $ |        |                |                    |                       |                       | 0.1                 |

| O...H in Linear                          |        | CCSD/BBC1      |                    | MP2/Müller            |                       |                     |
|------------------------------------------|--------|----------------|--------------------|-----------------------|-----------------------|---------------------|
| Atom A                                   | Atom B | $V_{XC}^{A,B}$ | $V_{XC}^{A,B} / E$ | Comput $V_{XC}^{A,B}$ | Expect $V_{XC}^{A,B}$ | $\Delta_{XC}^{A,B}$ |
| O3                                       | H5     | -0.50          | 3.49384E-06        | -0.05                 | -0.50                 | 0.45                |
| O3                                       | H7     | -1.96          | 1.36138E-05        | -1.53                 | -1.96                 | 0.43                |
| O3                                       | H8     | -6.10          | 4.23306E-05        | -5.86                 | -6.10                 | 0.24                |
| O3                                       | H9     | -1.96          | 1.36138E-05        | -1.53                 | -1.96                 | 0.43                |
| O3                                       | H10    | -6.10          | 4.23306E-05        | -5.86                 | -6.10                 | 0.24                |
| O4                                       | H6     | -0.50          | 3.49384E-06        | -0.05                 | -0.50                 | 0.45                |
| O4                                       | H7     | -6.10          | 4.23306E-05        | -5.86                 | -6.10                 | 0.24                |
| O4                                       | H8     | -1.96          | 1.36138E-05        | -1.53                 | -1.96                 | 0.43                |
| O4                                       | H9     | -6.10          | 4.23306E-05        | -5.86                 | -6.10                 | 0.24                |
| O4                                       | H10    | -1.96          | 1.36138E-05        | -1.53                 | -1.96                 | 0.43                |
| Average for $ \Delta_{XC}^{A,B} $        |        |                |                    |                       |                       | 0.4                 |
| Std. deviation for $ \Delta_{XC}^{A,B} $ |        |                |                    |                       |                       | 0.1                 |

| O...H in Eclipsed                        |        | CCSD/BBC1      |                    | MP2/Müller            |                       |                     |
|------------------------------------------|--------|----------------|--------------------|-----------------------|-----------------------|---------------------|
| Atom A                                   | Atom B | $V_{XC}^{A,B}$ | $V_{XC}^{A,B} / E$ | Comput $V_{XC}^{A,B}$ | Expect $V_{XC}^{A,B}$ | $\Delta_{XC}^{A,B}$ |
| O3                                       | H5     | -0.67          | 4.62679E-06        | -0.14                 | -0.67                 | 0.53                |
| O3                                       | H7     | -0.70          | 4.84171E-06        | -0.21                 | -0.70                 | 0.49                |
| O3                                       | H8     | -6.58          | 4.56687E-05        | -6.36                 | -6.58                 | 0.22                |
| O3                                       | H9     | -0.70          | 4.84171E-06        | -0.21                 | -0.70                 | 0.49                |
| O3                                       | H10    | -6.58          | 4.56687E-05        | -6.36                 | -6.58                 | 0.22                |
| O4                                       | H6     | -0.67          | 4.62679E-06        | -0.14                 | -0.67                 | 0.53                |
| O4                                       | H7     | -6.58          | 4.56687E-05        | -6.36                 | -6.58                 | 0.22                |
| O4                                       | H8     | -0.70          | 4.84171E-06        | -0.21                 | -0.70                 | 0.49                |
| O4                                       | H9     | -6.58          | 4.56687E-05        | -6.36                 | -6.58                 | 0.22                |
| O4                                       | H10    | -0.70          | 4.84171E-06        | -0.21                 | -0.70                 | 0.49                |
| Average for $ \Delta_{XC}^{A,B} $        |        |                |                    |                       |                       | 0.4                 |
| Std. deviation for $ \Delta_{XC}^{A,B} $ |        |                |                    |                       |                       | 0.1                 |

**Table S104.** Using the CCSD/BBC1 data as a reference, analysis of relative errors  $\Delta_{int}^{A,B}$  of interaction energies  $E_{int}^{A,B}$  computed at MP2/Müller for distant H,H atom-pairs in all conformers of glycol (values in kcal mol<sup>-1</sup>).

| H...H in LEC                              |        | CCSD/BBC1       |                     | MP2/Müller             |                        |                      |
|-------------------------------------------|--------|-----------------|---------------------|------------------------|------------------------|----------------------|
| Atom A                                    | Atom B | $E_{int}^{A,B}$ | $E_{int}^{A,B} / E$ | Comput $E_{int}^{A,B}$ | Expect $E_{int}^{A,B}$ | $\Delta_{int}^{A,B}$ |
| H5                                        | H6     | 36.97           | -2.56444E-04        | 38.74                  | 36.96                  | 1.78                 |
| H5                                        | H7     | -1.91           | 1.32190E-05         | -0.52                  | -1.91                  | 1.38                 |
| H5                                        | H8     | -0.65           | 4.54108E-06         | 0.11                   | -0.65                  | 0.76                 |
| H5                                        | H9     | -2.20           | 1.52426E-05         | -0.92                  | -2.20                  | 1.28                 |
| H5                                        | H10    | -1.79           | 1.23902E-05         | -0.91                  | -1.79                  | 0.87                 |
| H6                                        | H7     | -1.78           | 1.23769E-05         | -0.63                  | -1.78                  | 1.16                 |
| H6                                        | H8     | -0.43           | 2.95773E-06         | 0.77                   | -0.43                  | 1.19                 |
| H6                                        | H9     | -1.50           | 1.03754E-05         | -0.57                  | -1.50                  | 0.93                 |
| H6                                        | H10    | -1.52           | 1.05510E-05         | -0.13                  | -1.52                  | 1.39                 |
| H7                                        | H8     | -0.42           | 2.91928E-06         | -0.16                  | -0.42                  | 0.26                 |
| H7                                        | H9     | -2.32           | 1.60696E-05         | -2.17                  | -2.32                  | 0.15                 |
| H7                                        | H10    | -0.55           | 3.79630E-06         | -0.38                  | -0.55                  | 0.17                 |
| H8                                        | H9     | -0.32           | 2.23740E-06         | -0.17                  | -0.32                  | 0.15                 |
| H8                                        | H10    | -2.38           | 1.65337E-05         | -2.14                  | -2.38                  | 0.25                 |
| H9                                        | H10    | -0.25           | 1.74888E-06         | -0.16                  | -0.25                  | 0.09                 |
| Average for $ \Delta_{int}^{A,B} $        |        |                 |                     |                        |                        | 0.8                  |
| Std. deviation for $ \Delta_{int}^{A,B} $ |        |                 |                     |                        |                        | 0.6                  |

| H...H in Linear                                         |        | CCSD/BBC1                     |                                   | MP2/Müller                           |                                      |                                    |
|---------------------------------------------------------|--------|-------------------------------|-----------------------------------|--------------------------------------|--------------------------------------|------------------------------------|
| Atom A                                                  | Atom B | $E_{\text{int}}^{\text{A,B}}$ | $E_{\text{int}}^{\text{A,B}} / E$ | Comput $E_{\text{int}}^{\text{A,B}}$ | Expect $E_{\text{int}}^{\text{A,B}}$ | $\Delta_{\text{int}}^{\text{A,B}}$ |
| H5                                                      | H6     | 22.72                         | -1.57635E-04                      | 23.75                                | 22.72                                | 1.03                               |
| H5                                                      | H7     | -1.84                         | 1.27666E-05                       | -0.58                                | -1.84                                | 1.26                               |
| H5                                                      | H8     | -1.82                         | 1.25965E-05                       | -1.00                                | -1.82                                | 0.81                               |
| H5                                                      | H9     | -1.84                         | 1.27666E-05                       | -0.58                                | -1.84                                | 1.26                               |
| H5                                                      | H10    | -1.82                         | 1.25965E-05                       | -1.00                                | -1.82                                | 0.81                               |
| H6                                                      | H7     | -1.82                         | 1.25965E-05                       | -1.00                                | -1.82                                | 0.81                               |
| H6                                                      | H8     | -1.84                         | 1.27666E-05                       | -0.58                                | -1.84                                | 1.26                               |
| H6                                                      | H9     | -1.82                         | 1.25965E-05                       | -1.00                                | -1.82                                | 0.81                               |
| H6                                                      | H10    | -1.84                         | 1.27666E-05                       | -0.58                                | -1.84                                | 1.26                               |
| H7                                                      | H8     | -0.57                         | 3.92163E-06                       | -0.35                                | -0.57                                | 0.22                               |
| H7                                                      | H9     | -2.51                         | 1.73979E-05                       | -2.21                                | -2.51                                | 0.30                               |
| H7                                                      | H10    | -0.46                         | 3.19134E-06                       | -0.17                                | -0.46                                | 0.29                               |
| H8                                                      | H9     | -0.46                         | 3.19134E-06                       | -0.17                                | -0.46                                | 0.29                               |
| H8                                                      | H10    | -2.51                         | 1.73979E-05                       | -2.21                                | -2.51                                | 0.30                               |
| H9                                                      | H10    | -0.57                         | 3.92163E-06                       | -0.35                                | -0.57                                | 0.22                               |
| Average for $ \Delta_{\text{int}}^{\text{A,B}} $        |        |                               |                                   |                                      |                                      | 0.7                                |
| Std. deviation for $ \Delta_{\text{int}}^{\text{A,B}} $ |        |                               |                                   |                                      |                                      | 0.4                                |

| H...H in Eclipsed                                       |        | CCSD/BBC1                     |                                   | MP2/Müller                           |                                      |                                    |
|---------------------------------------------------------|--------|-------------------------------|-----------------------------------|--------------------------------------|--------------------------------------|------------------------------------|
| Atom A                                                  | Atom B | $E_{\text{int}}^{\text{A,B}}$ | $E_{\text{int}}^{\text{A,B}} / E$ | Comput $E_{\text{int}}^{\text{A,B}}$ | Expect $E_{\text{int}}^{\text{A,B}}$ | $\Delta_{\text{int}}^{\text{A,B}}$ |
| H5                                                      | H6     | 25.93                         | -1.79929E-04                      | 27.13                                | 25.93                                | 1.20                               |
| H5                                                      | H7     | -3.37                         | 2.33517E-05                       | -2.16                                | -3.37                                | 1.20                               |
| H5                                                      | H8     | -2.23                         | 1.54635E-05                       | -1.54                                | -2.23                                | 0.69                               |
| H5                                                      | H9     | -3.37                         | 2.33517E-05                       | -2.16                                | -3.37                                | 1.20                               |
| H5                                                      | H10    | -2.23                         | 1.54635E-05                       | -1.54                                | -2.23                                | 0.69                               |
| H6                                                      | H7     | -2.23                         | 1.54635E-05                       | -1.54                                | -2.23                                | 0.69                               |
| H6                                                      | H8     | -3.37                         | 2.33517E-05                       | -2.16                                | -3.37                                | 1.20                               |
| H6                                                      | H9     | -2.23                         | 1.54635E-05                       | -1.54                                | -2.23                                | 0.69                               |
| H6                                                      | H10    | -3.37                         | 2.33517E-05                       | -2.16                                | -3.37                                | 1.20                               |
| H7                                                      | H8     | -0.88                         | 6.13093E-06                       | -0.67                                | -0.88                                | 0.22                               |
| H7                                                      | H9     | -2.65                         | 1.83821E-05                       | -2.48                                | -2.65                                | 0.17                               |
| H7                                                      | H10    | -0.25                         | 1.76286E-06                       | -0.06                                | -0.25                                | 0.20                               |
| H8                                                      | H9     | -0.25                         | 1.76286E-06                       | -0.06                                | -0.25                                | 0.20                               |
| H8                                                      | H10    | -2.65                         | 1.83821E-05                       | -2.48                                | -2.65                                | 0.17                               |
| H9                                                      | H10    | -0.88                         | 6.13093E-06                       | -0.67                                | -0.88                                | 0.22                               |
| Average for $ \Delta_{\text{int}}^{\text{A,B}} $        |        |                               |                                   |                                      |                                      | 0.7                                |
| Std. deviation for $ \Delta_{\text{int}}^{\text{A,B}} $ |        |                               |                                   |                                      |                                      | 0.4                                |

**Table S105.** Using the CCSD/BBC1 data as a reference, analysis of relative errors  $\Delta_{cl}^{A,B}$  in the classical term  $V_{cl}^{A,B}$  of interaction energies computed at MP2/Müller for distant H,H atom-pairs in all conformers of glycol (values in kcal mol<sup>-1</sup>).

| <b>H...H in LEC</b>                      |               | <b>CCSD/BBC1</b> |                    | <b>MP2/Müller</b>     |                       |                     |
|------------------------------------------|---------------|------------------|--------------------|-----------------------|-----------------------|---------------------|
| <b>Atom A</b>                            | <b>Atom B</b> | $V_{cl}^{A,B}$   | $V_{cl}^{A,B} / E$ | Comput $V_{cl}^{A,B}$ | Expect $V_{cl}^{A,B}$ | $\Delta_{cl}^{A,B}$ |
| H5                                       | H6            | 37.09            | -2.57280E-04       | 38.77                 | 37.08                 | 1.69                |
| H5                                       | H7            | -1.73            | 1.19752E-05        | -0.38                 | -1.73                 | 1.34                |
| H5                                       | H8            | -0.59            | 4.11552E-06        | 0.16                  | -0.59                 | 0.75                |
| H5                                       | H9            | -2.11            | 1.46141E-05        | -0.86                 | -2.11                 | 1.25                |
| H5                                       | H10           | -1.71            | 1.18685E-05        | -0.89                 | -1.71                 | 0.82                |
| H6                                       | H7            | -1.70            | 1.17605E-05        | -0.62                 | -1.69                 | 1.08                |
| H6                                       | H8            | -0.08            | 5.40273E-07        | 1.08                  | -0.08                 | 1.16                |
| H6                                       | H9            | -1.41            | 9.76436E-06        | -0.55                 | -1.41                 | 0.86                |
| H6                                       | H10           | -1.38            | 9.58579E-06        | -0.07                 | -1.38                 | 1.31                |
| H7                                       | H8            | 0.20             | -1.38967E-06       | 0.16                  | 0.20                  | -0.04               |
| H7                                       | H9            | 0.69             | -4.78518E-06       | 0.73                  | 0.69                  | 0.04                |
| H7                                       | H10           | 0.08             | -5.50299E-07       | 0.06                  | 0.08                  | -0.02               |
| H8                                       | H9            | 0.26             | -1.82468E-06       | 0.19                  | 0.26                  | -0.07               |
| H8                                       | H10           | 0.67             | -4.65740E-06       | 0.76                  | 0.67                  | 0.09                |
| H9                                       | H10           | 0.30             | -2.06546E-06       | 0.20                  | 0.30                  | -0.09               |
| Average for $ \Delta_{cl}^{A,B} $        |               |                  |                    |                       |                       | 0.7                 |
| Std. deviation for $ \Delta_{cl}^{A,B} $ |               |                  |                    |                       |                       | 0.6                 |

  

| <b>H...H in Linear</b>                   |               | <b>CCSD/BBC1</b> |                    | <b>MP2/Müller</b>     |                       |                     |
|------------------------------------------|---------------|------------------|--------------------|-----------------------|-----------------------|---------------------|
| <b>Atom A</b>                            | <b>Atom B</b> | $V_{cl}^{A,B}$   | $V_{cl}^{A,B} / E$ | Comput $V_{cl}^{A,B}$ | Expect $V_{cl}^{A,B}$ | $\Delta_{cl}^{A,B}$ |
| H5                                       | H6            | 22.91            | -1.58934E-04       | 23.75                 | 22.91                 | 0.85                |
| H5                                       | H7            | -1.74            | 1.20370E-05        | -0.49                 | -1.73                 | 1.25                |
| H5                                       | H8            | -1.78            | 1.23721E-05        | -0.98                 | -1.78                 | 0.80                |
| H5                                       | H9            | -1.74            | 1.20370E-05        | -0.49                 | -1.73                 | 1.25                |
| H5                                       | H10           | -1.78            | 1.23721E-05        | -0.98                 | -1.78                 | 0.80                |
| H6                                       | H7            | -1.78            | 1.23721E-05        | -0.98                 | -1.78                 | 0.80                |
| H6                                       | H8            | -1.74            | 1.20370E-05        | -0.49                 | -1.73                 | 1.25                |
| H6                                       | H9            | -1.78            | 1.23721E-05        | -0.98                 | -1.78                 | 0.80                |
| H6                                       | H10           | -1.74            | 1.20370E-05        | -0.49                 | -1.73                 | 1.25                |
| H7                                       | H8            | 0.08             | -5.35901E-07       | 0.06                  | 0.08                  | -0.02               |
| H7                                       | H9            | 0.67             | -4.65362E-06       | 0.73                  | 0.67                  | 0.06                |
| H7                                       | H10           | 0.21             | -1.46599E-06       | 0.16                  | 0.21                  | -0.05               |
| H8                                       | H9            | 0.21             | -1.46599E-06       | 0.16                  | 0.21                  | -0.05               |
| H8                                       | H10           | 0.67             | -4.65362E-06       | 0.73                  | 0.67                  | 0.06                |
| H9                                       | H10           | 0.08             | -5.35901E-07       | 0.06                  | 0.08                  | -0.02               |
| Average for $ \Delta_{cl}^{A,B} $        |               |                  |                    |                       |                       | 0.6                 |
| Std. deviation for $ \Delta_{cl}^{A,B} $ |               |                  |                    |                       |                       | 0.5                 |



| H...H in Eclipsed                        |        | CCSD/BBC1      |                    | MP2/Müller            |                       |                     |
|------------------------------------------|--------|----------------|--------------------|-----------------------|-----------------------|---------------------|
| Atom A                                   | Atom B | $V_{cl}^{A,B}$ | $V_{cl}^{A,B} / E$ | Comput $V_{cl}^{A,B}$ | Expect $V_{cl}^{A,B}$ | $\Delta_{cl}^{A,B}$ |
| H5                                       | H6     | 26.14          | -1.81338E-04       | 27.14                 | 26.13                 | 1.01                |
| H5                                       | H7     | -3.23          | 2.23898E-05        | -2.05                 | -3.23                 | 1.18                |
| H5                                       | H8     | -2.19          | 1.52172E-05        | -1.52                 | -2.19                 | 0.67                |
| H5                                       | H9     | -3.23          | 2.23898E-05        | -2.05                 | -3.23                 | 1.18                |
| H5                                       | H10    | -2.19          | 1.52172E-05        | -1.52                 | -2.19                 | 0.67                |
| H6                                       | H7     | -2.19          | 1.52172E-05        | -1.52                 | -2.19                 | 0.67                |
| H6                                       | H8     | -3.23          | 2.23898E-05        | -2.05                 | -3.23                 | 1.18                |
| H6                                       | H9     | -2.19          | 1.52172E-05        | -1.52                 | -2.19                 | 0.67                |
| H6                                       | H10    | -3.23          | 2.23898E-05        | -2.05                 | -3.23                 | 1.18                |
| H7                                       | H8     | 0.58           | -3.99386E-06       | 0.42                  | 0.58                  | -0.15               |
| H7                                       | H9     | 0.80           | -5.52134E-06       | 0.76                  | 0.80                  | -0.04               |
| H7                                       | H10    | 0.25           | -1.76849E-06       | 0.16                  | 0.25                  | -0.09               |
| H8                                       | H9     | 0.25           | -1.76849E-06       | 0.16                  | 0.25                  | -0.09               |
| H8                                       | H10    | 0.80           | -5.52134E-06       | 0.76                  | 0.80                  | -0.04               |
| H9                                       | H10    | 0.58           | -3.99386E-06       | 0.42                  | 0.58                  | -0.15               |
| Average for $ \Delta_{cl}^{A,B} $        |        |                |                    |                       |                       | 0.6                 |
| Std. deviation for $ \Delta_{cl}^{A,B} $ |        |                |                    |                       |                       | 0.5                 |

**Table S106.** Using the CCSD/BBC1 data as a reference, analysis of relative errors  $\Delta_{XC}^{A,B}$  in the XC-term  $V_{XC}^{A,B}$  of interaction energies computed at MP2/Müller for distant H,H atom-pairs in all conformers of glycol (values in kcal mol<sup>-1</sup>).

| H...H in LEC                             |        | CCSD/BBC1      |                    | MP2/Müller            |                       |                     |
|------------------------------------------|--------|----------------|--------------------|-----------------------|-----------------------|---------------------|
| Atom A                                   | Atom B | $V_{XC}^{A,B}$ | $V_{XC}^{A,B} / E$ | Comput $V_{XC}^{A,B}$ | Expect $V_{XC}^{A,B}$ | $\Delta_{XC}^{A,B}$ |
| H5                                       | H6     | -0.12          | 8.35982E-07        | -0.03                 | -0.12                 | 0.09                |
| H5                                       | H7     | -0.18          | 1.24377E-06        | -0.14                 | -0.18                 | 0.04                |
| H5                                       | H8     | -0.06          | 4.25557E-07        | -0.05                 | -0.06                 | 0.01                |
| H5                                       | H9     | -0.09          | 6.28456E-07        | -0.06                 | -0.09                 | 0.03                |
| H5                                       | H10    | -0.08          | 5.21707E-07        | -0.03                 | -0.08                 | 0.05                |
| H6                                       | H7     | -0.09          | 6.16356E-07        | -0.01                 | -0.09                 | 0.08                |
| H6                                       | H8     | -0.35          | 2.41746E-06        | -0.31                 | -0.35                 | 0.04                |
| H6                                       | H9     | -0.09          | 6.11051E-07        | -0.02                 | -0.09                 | 0.07                |
| H6                                       | H10    | -0.14          | 9.65231E-07        | -0.07                 | -0.14                 | 0.07                |
| H7                                       | H8     | -0.62          | 4.30895E-06        | -0.33                 | -0.62                 | 0.30                |
| H7                                       | H9     | -3.01          | 2.08548E-05        | -2.89                 | -3.01                 | 0.11                |
| H7                                       | H10    | -0.63          | 4.34660E-06        | -0.44                 | -0.63                 | 0.19                |
| H8                                       | H9     | -0.59          | 4.06207E-06        | -0.36                 | -0.59                 | 0.22                |
| H8                                       | H10    | -3.05          | 2.11911E-05        | -2.90                 | -3.05                 | 0.16                |
| H9                                       | H10    | -0.55          | 3.81434E-06        | -0.37                 | -0.55                 | 0.18                |
| Average for $ \Delta_{XC}^{A,B} $        |        |                |                    |                       |                       | 0.1                 |
| Std. deviation for $ \Delta_{XC}^{A,B} $ |        |                |                    |                       |                       | 0.1                 |

| <b>H...H in Linear</b>                   |               | <b>CCSD/BBC1</b> |                    | <b>MP2/Müller</b>     |                       |                     |
|------------------------------------------|---------------|------------------|--------------------|-----------------------|-----------------------|---------------------|
| <b>Atom A</b>                            | <b>Atom B</b> | $V_{XC}^{A,B}$   | $V_{XC}^{A,B} / E$ | Comput $V_{XC}^{A,B}$ | Expect $V_{XC}^{A,B}$ | $\Delta_{XC}^{A,B}$ |
| H5                                       | H6            | -0.19            | 1.29892E-06        | -0.01                 | -0.19                 | 0.18                |
| H5                                       | H7            | -0.11            | 7.29610E-07        | -0.09                 | -0.11                 | 0.01                |
| H5                                       | H8            | -0.03            | 2.24489E-07        | -0.02                 | -0.03                 | 0.01                |
| H5                                       | H9            | -0.11            | 7.29610E-07        | -0.09                 | -0.11                 | 0.01                |
| H5                                       | H10           | -0.03            | 2.24489E-07        | -0.02                 | -0.03                 | 0.01                |
| H6                                       | H7            | -0.03            | 2.24489E-07        | -0.02                 | -0.03                 | 0.01                |
| H6                                       | H8            | -0.11            | 7.29610E-07        | -0.09                 | -0.11                 | 0.01                |
| H6                                       | H9            | -0.03            | 2.24489E-07        | -0.02                 | -0.03                 | 0.01                |
| H6                                       | H10           | -0.11            | 7.29610E-07        | -0.09                 | -0.11                 | 0.01                |
| H7                                       | H8            | -0.64            | 4.45753E-06        | -0.41                 | -0.64                 | 0.23                |
| H7                                       | H9            | -3.18            | 2.20515E-05        | -2.94                 | -3.18                 | 0.23                |
| H7                                       | H10           | -0.67            | 4.65732E-06        | -0.33                 | -0.67                 | 0.34                |
| H8                                       | H9            | -0.67            | 4.65732E-06        | -0.33                 | -0.67                 | 0.34                |
| H8                                       | H10           | -3.18            | 2.20515E-05        | -2.94                 | -3.18                 | 0.23                |
| H9                                       | H10           | -0.64            | 4.45753E-06        | -0.41                 | -0.64                 | 0.23                |
| Average for $ \Delta_{XC}^{A,B} $        |               |                  |                    |                       |                       | 0.1                 |
| Std. deviation for $ \Delta_{XC}^{A,B} $ |               |                  |                    |                       |                       | 0.1                 |

| <b>H...H in Eclipsed</b>                 |               | <b>CCSD/BBC1</b> |                    | <b>MP2/Müller</b>     |                       |                     |
|------------------------------------------|---------------|------------------|--------------------|-----------------------|-----------------------|---------------------|
| <b>Atom A</b>                            | <b>Atom B</b> | $V_{XC}^{A,B}$   | $V_{XC}^{A,B} / E$ | Comput $V_{XC}^{A,B}$ | Expect $V_{XC}^{A,B}$ | $\Delta_{XC}^{A,B}$ |
| H5                                       | H6            | -0.20            | 1.40935E-06        | -0.01                 | -0.20                 | 0.20                |
| H5                                       | H7            | -0.14            | 9.61846E-07        | -0.12                 | -0.14                 | 0.02                |
| H5                                       | H8            | -0.04            | 2.46282E-07        | -0.02                 | -0.04                 | 0.02                |
| H5                                       | H9            | -0.14            | 9.61846E-07        | -0.12                 | -0.14                 | 0.02                |
| H5                                       | H10           | -0.04            | 2.46282E-07        | -0.02                 | -0.04                 | 0.02                |
| H6                                       | H7            | -0.04            | 2.46282E-07        | -0.02                 | -0.04                 | 0.02                |
| H6                                       | H8            | -0.14            | 9.61846E-07        | -0.12                 | -0.14                 | 0.02                |
| H6                                       | H9            | -0.04            | 2.46282E-07        | -0.02                 | -0.04                 | 0.02                |
| H6                                       | H10           | -0.14            | 9.61846E-07        | -0.12                 | -0.14                 | 0.02                |
| H7                                       | H8            | -1.46            | 1.01248E-05        | -1.09                 | -1.46                 | 0.37                |
| H7                                       | H9            | -3.45            | 2.39035E-05        | -3.23                 | -3.44                 | 0.21                |
| H7                                       | H10           | -0.51            | 3.53135E-06        | -0.22                 | -0.51                 | 0.29                |
| H8                                       | H9            | -0.51            | 3.53135E-06        | -0.22                 | -0.51                 | 0.29                |
| H8                                       | H10           | -3.45            | 2.39035E-05        | -3.23                 | -3.44                 | 0.21                |
| H9                                       | H10           | -1.46            | 1.01248E-05        | -1.09                 | -1.46                 | 0.37                |
| Average for $ \Delta_{XC}^{A,B} $        |               |                  |                    |                       |                       | 0.1                 |
| Std. deviation for $ \Delta_{XC}^{A,B} $ |               |                  |                    |                       |                       | 0.1                 |

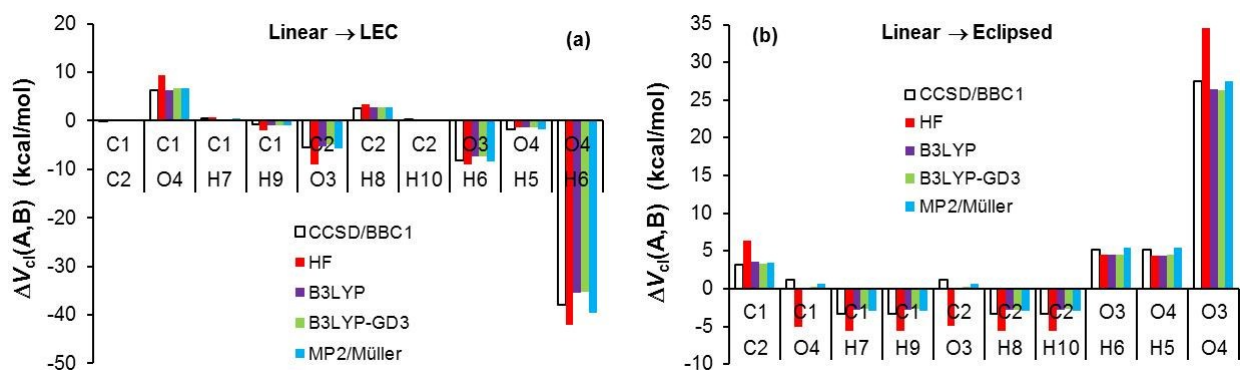

**Figure S9.** Changes in the classical term of diatomic interaction energies for the indicated atom-pairs on **Lin** → **LEC** (part a) and **Lin** → **Ecl** (part b) structural transformations of glycol at specified levels of theory.

Changes in the classical term of interactions are shown in Figure S9. Trends in  $\Delta V_{\text{cl}}^{\text{A,B}}$  and their values observed for **Lin** → **LEC** mimic those for  $\Delta E_{\text{int}}^{\text{A,B}}$  seen in Figure 10a in the main body of the text. From that follows that main contributions to  $\Delta E_{\text{int}}^{\text{A,B}}$  come from the classical term. For instance,  $\Delta V_{\text{cl}}^{\text{O4,H6}} = -38.0 \text{ kcal mol}^{-1}$  is smaller than  $\Delta E_{\text{int}}^{\text{O4,H6}}$  by just  $2.5 \text{ kcal mol}^{-1}$ ; this is in full agreement with common knowledge when intramolecular H-bonds are considered. Dominance of classical contributions is also observed for C1–O4 and C2–O3 atom-pairs as they are smaller, relative to their interaction energies, by  $1.3$  and  $2.6 \text{ kcal mol}^{-1}$ , respectively). Quite a different picture emerged from the **Lin** → **Ecl** structural change where  $\Delta V_{\text{cl}}^{\text{O3,O4}}$  term is  $9.5 \text{ kcal mol}^{-1}$  larger than  $\Delta E_{\text{int}}^{\text{O3,O4}}$  and this exemplifies a large increase in repulsive forces acting on these two clashing O-atoms in **Ecl**. Interestingly, the change in the interaction energy between C-atoms of the linker ( $\Delta E_{\text{int}}^{\text{C1,C2}} = +8.9 \text{ kcal mol}^{-1}$ ) is not dominated by the classical term as it became more positive only by  $+3.2 \text{ kcal mol}^{-1}$ , from  $V_{\text{cl}}^{\text{C1,C2}}$  of  $+78.4$  (in **Lin**) to  $+81.6$  (in **Ecl**)  $\text{kcal mol}^{-1}$ .



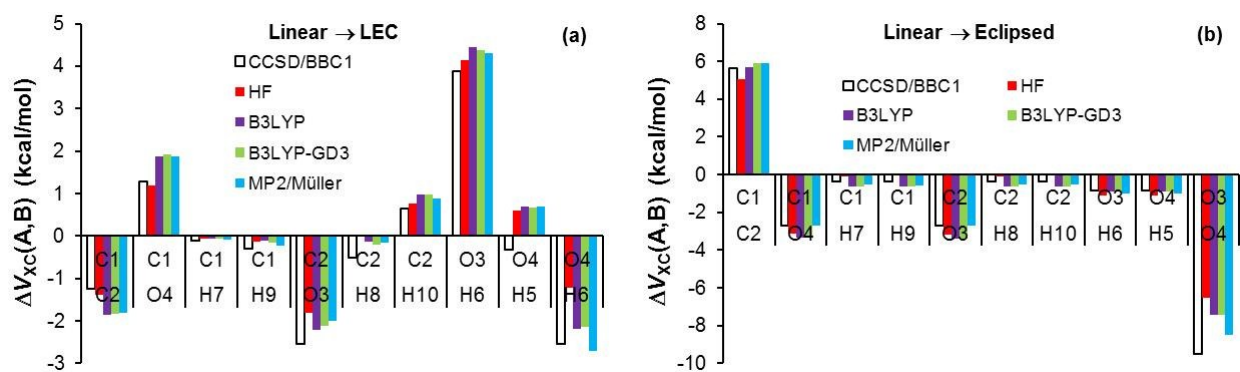

**Figure S10.** Changes in the XC-term of diatomic interaction energies for the indicated atom-pairs on **Lin**  $\rightarrow$  **LEC** (part a) and **Lin**  $\rightarrow$  **Ecl** (part b) structural transformations of glycol at specified levels of theory.

Figure S10 uncovers many atom-pairs for which significant change in covalent component of an interaction took place, the  $\Delta V_{XC}^{A,B}$  term. There are 3 ( $\{O3,H6\}$ ,  $\{O4,H6\}$  and  $\{C2,O3\}$ ) and 2 ( $\{C1,C2\}$  and  $\{C1,O4\}$ ) atom-pairs in **LEC** for which the XC-term changed at CCSD/BBC1 by more than 2 and 1 kcal mol<sup>-1</sup>, respectively. Among them, the C1–C2, C2–O3 and O4...H6 atom-pairs experienced an increase in the covalent component of an interaction. On **Lin**  $\rightarrow$  **LEC** (Figure S10a), the largest change among all possible atom pairs in glycol took place for the O3–H6 atom-pair for which a significant decrease in the XC-term is observed, by +3.9 kcal mol<sup>-1</sup>. Four significant changes in the XC-term are seen for the **Ecl** conformer in Figure S10b. Note that atoms involved in a steric clash (O3--O4) in the **Ecl** conformer experienced a significant increase in the XC-term as also found for the H-bonding (O4...H6) in **LEC**. Moreover,  $\Delta V_{XC}^{C1,C2}$  of -9.5 kcal mol<sup>-1</sup> at CCSD/BBC1 is most significant on **Lin**  $\rightarrow$  **Ecl**. Recalling that  $V_{XC}^{A,B} < 0$  always holds (hence, it is always of a stabilizing nature) one could argue that this energy component strengthens the H-bonding (O4...H6) in **LEC** whereas partly counteracts, or compensates for, the increased repulsive classical term in the case of a steric clash (O3--O4) in **Ecl**. Lastly, let us focus on the link for which we observe opposite trends in the two conformers. A significant decrease in the XC-term, by 5.6 kcal mol<sup>-1</sup>, took place in **Ecl** but a small increase by -1.3 kcal mol<sup>-1</sup> is observed in **LEC** and in both cases  $\Delta V_{XC}^{C1,C2}$  is more significant than  $\Delta V_{cl}^{C1,C2}$ . As a consequence, the link became significantly weaker in **Ecl** and somewhat stronger in **LEC**.

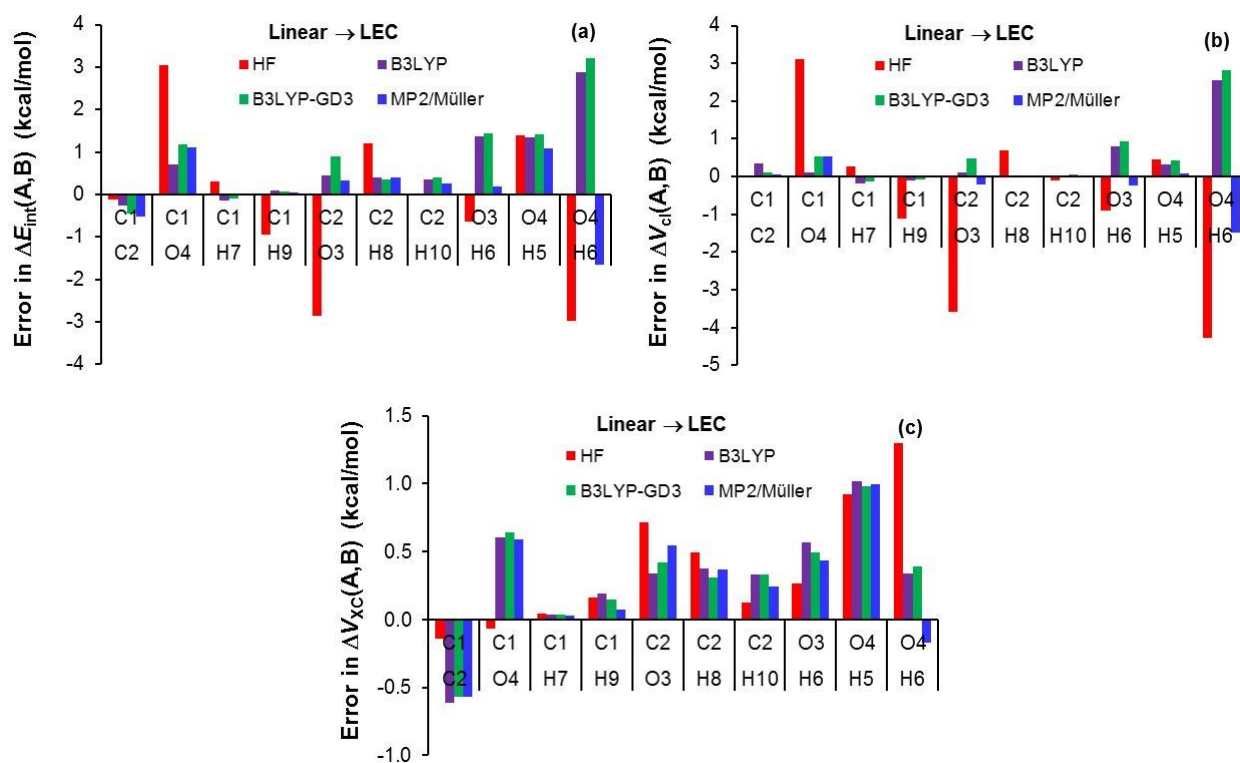

**Figure S11.** Relative to CCSD/BBC1, errors in  $\Delta E_{\text{int}}^{\text{A,B}}$  (part a),  $\Delta V_{\text{cl}}^{\text{A,B}}$  (part b) and  $\Delta V_{\text{XC}}^{\text{A,B}}$  (part c) obtained for covalently bonded atoms and the intra-molecular O4...H6 interaction on the **Lin** → **LEC** structural change.

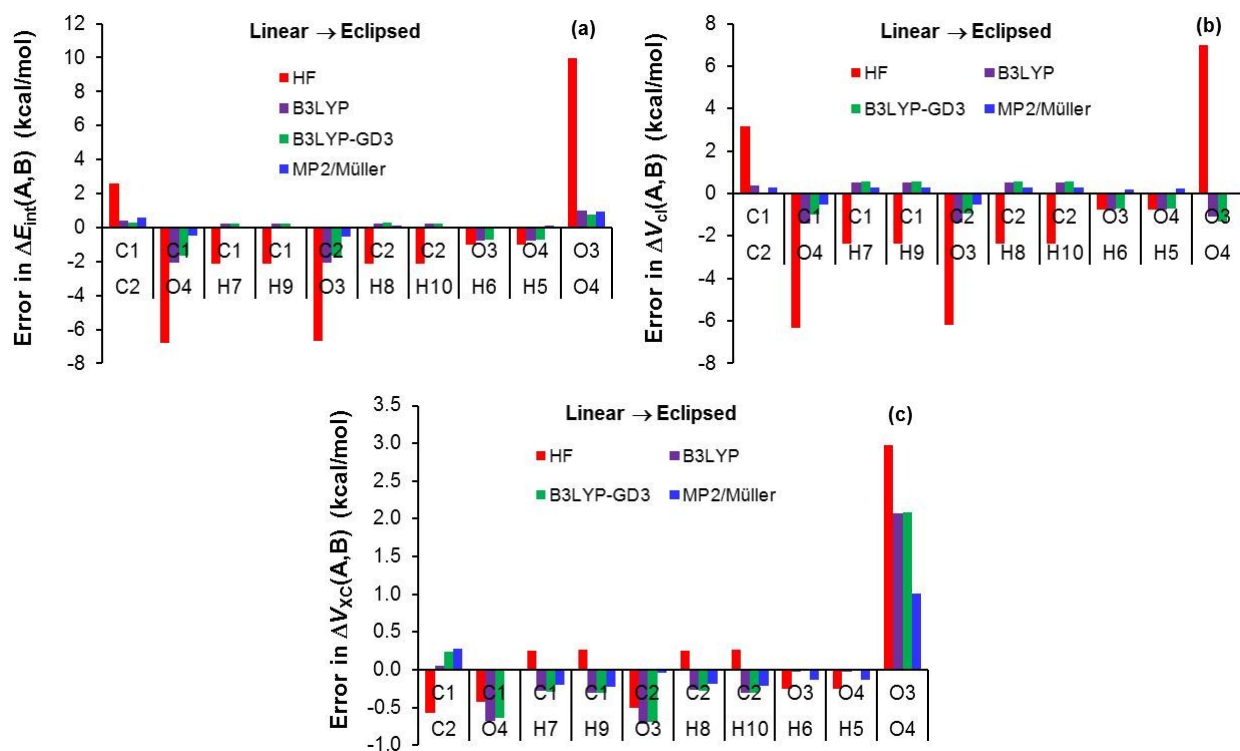

**Figure S12.** Relative to CCSD/BBC1, errors in  $\Delta E_{\text{int}}^{\text{A,B}}$  (part a),  $\Delta V_{\text{cl}}^{\text{A,B}}$  (part b) and  $\Delta V_{\text{XC}}^{\text{A,B}}$  (part c) obtained for covalently bonded atoms and an intra-molecular interaction O3...O4 on the **Lin** → **Ecl** structural change.

**Table S107.** Relative to the CCSD/BBC1 data, errors (part a) and averaged absolute errors (part b) in  $\Delta E_{\text{int}}^{\text{A,B}}$  (kcal mol<sup>-1</sup>) obtained for the **Lin** → **LEC** structural change at the indicated levels of theory.

| <b>Part a</b>     |               | <b>HF</b>                                     | <b>B3LYP</b> | <b>B3LYP-GD3</b> | <b>MP2/Müller</b> |
|-------------------|---------------|-----------------------------------------------|--------------|------------------|-------------------|
| <b>Atom A</b>     | <b>Atom B</b> | Error in $\Delta E_{\text{int}}^{\text{A,B}}$ |              |                  |                   |
| C2                | C1            | -0.13                                         | -0.27        | -0.46            | -0.53             |
| O4                | C1            | 3.04                                          | 0.71         | 1.19             | 1.12              |
| H7                | C1            | 0.30                                          | -0.14        | -0.09            | 0.02              |
| H9                | C1            | -0.96                                         | 0.09         | 0.08             | 0.05              |
| O3                | C2            | -2.87                                         | 0.44         | 0.90             | 0.33              |
| H8                | C2            | 1.20                                          | 0.41         | 0.35             | 0.41              |
| H10               | C2            | 0.02                                          | 0.34         | 0.40             | 0.25              |
| H6                | O3            | -0.63                                         | 1.37         | 1.44             | 0.19              |
| H5                | O4            | 1.39                                          | 1.34         | 1.42             | 1.09              |
| H6                | O4            | -2.97                                         | 2.88         | 3.21             | -1.66             |
| <i>Average:</i>   |               | <i>-0.16</i>                                  | <i>0.72</i>  | <i>0.84</i>      | <i>0.13</i>       |
| <i>Std. dev.:</i> |               | <i>1.85</i>                                   | <i>0.94</i>  | <i>1.05</i>      | <i>0.80</i>       |

  

| <b>Part b</b>     |  | Averaged absolute error in $\Delta E_{\text{int}}^{\text{A,B}}$ |             |             |             |
|-------------------|--|-----------------------------------------------------------------|-------------|-------------|-------------|
| <i>Average:</i>   |  | <i>1.35</i>                                                     | <i>0.80</i> | <i>0.95</i> | <i>0.56</i> |
| <i>Std. dev.:</i> |  | <i>1.19</i>                                                     | <i>0.86</i> | <i>0.95</i> | <i>0.55</i> |

**Table S108.** Relative to the CCSD/BBC1 data, errors (part a) and averaged absolute errors (part b) in  $\Delta V_{\text{cl}}^{\text{A,B}}$  (kcal mol<sup>-1</sup>) obtained for the **Lin** → **LEC** structural change at the indicated levels of theory.

| <b>Part a</b>     |               | <b>HF</b>                                    | <b>B3LYP</b> | <b>B3LYP-GD3</b> | <b>MP2/Müller</b> |
|-------------------|---------------|----------------------------------------------|--------------|------------------|-------------------|
| <b>Atom A</b>     | <b>Atom B</b> | Error in $\Delta V_{\text{cl}}^{\text{A,B}}$ |              |                  |                   |
| C2                | C1            | 0.01                                         | 0.34         | 0.12             | 0.04              |
| O4                | C1            | 3.11                                         | 0.10         | 0.55             | 0.53              |
| H7                | C1            | 0.26                                         | -0.18        | -0.13            | -0.01             |
| H9                | C1            | -1.12                                        | -0.10        | -0.07            | -0.03             |
| O3                | C2            | -3.59                                        | 0.11         | 0.48             | -0.22             |
| H8                | C2            | 0.70                                         | 0.04         | 0.04             | 0.04              |
| H10               | C2            | -0.10                                        | 0.01         | 0.07             | 0.00              |
| H6                | O3            | -0.89                                        | 0.80         | 0.95             | -0.24             |
| H5                | O4            | 0.47                                         | 0.33         | 0.44             | 0.09              |
| H6                | O4            | -4.27                                        | 2.54         | 2.82             | -1.50             |
| <i>Average:</i>   |               | <i>-0.54</i>                                 | <i>0.40</i>  | <i>0.53</i>      | <i>-0.13</i>      |
| <i>Std. dev.:</i> |               | <i>2.13</i>                                  | <i>0.80</i>  | <i>0.87</i>      | <i>0.52</i>       |

  

| <b>Part b</b>     |  | Averaged absolute error in $\Delta V_{\text{cl}}^{\text{A,B}}$ |             |             |             |
|-------------------|--|----------------------------------------------------------------|-------------|-------------|-------------|
| <i>Average:</i>   |  | <i>1.45</i>                                                    | <i>0.45</i> | <i>0.57</i> | <i>0.27</i> |
| <i>Std. dev.:</i> |  | <i>1.58</i>                                                    | <i>0.77</i> | <i>0.85</i> | <i>0.46</i> |

**Table S109.** Relative to the CCSD/BBC1 data, errors (part a) and averaged absolute errors (part b) in  $\Delta V_{XC}^{A,B}$  (kcal mol<sup>-1</sup>) obtained for the **Lin** → **LEC** structural change at the indicated levels of theory.

| <b>Part a</b>     |               | <b>HF</b>                      | <b>B3LYP</b> | <b>B3LYP-GD3</b> | <b>MP2/Müller</b> |
|-------------------|---------------|--------------------------------|--------------|------------------|-------------------|
| <b>Atom A</b>     | <b>Atom B</b> | Error in $\Delta V_{XC}^{A,B}$ |              |                  |                   |
| C2                | C1            | -0.14                          | -0.61        | -0.57            | -0.57             |
| O4                | C1            | -0.07                          | 0.61         | 0.64             | 0.59              |
| H7                | C1            | 0.04                           | 0.04         | 0.03             | 0.03              |
| H9                | C1            | 0.16                           | 0.19         | 0.15             | 0.08              |
| O3                | C2            | 0.72                           | 0.33         | 0.42             | 0.55              |
| H8                | C2            | 0.49                           | 0.37         | 0.31             | 0.36              |
| H10               | C2            | 0.12                           | 0.33         | 0.33             | 0.25              |
| H6                | O3            | 0.26                           | 0.56         | 0.49             | 0.43              |
| H5                | O4            | 0.92                           | 1.01         | 0.98             | 1.00              |
| H6                | O4            | 1.30                           | 0.34         | 0.39             | -0.17             |
| <i>Average:</i>   |               | <i>0.38</i>                    | <i>0.32</i>  | <i>0.32</i>      | <i>0.25</i>       |
| <i>Std. dev.:</i> |               | <i>0.47</i>                    | <i>0.42</i>  | <i>0.41</i>      | <i>0.44</i>       |

  

| <b>Part b</b>     | Averaged absolute error in $\Delta V_{XC}^{A,B}$ |             |             |             |
|-------------------|--------------------------------------------------|-------------|-------------|-------------|
| <i>Average:</i>   | <i>0.42</i>                                      | <i>0.44</i> | <i>0.43</i> | <i>0.40</i> |
| <i>Std. dev.:</i> | <i>0.43</i>                                      | <i>0.27</i> | <i>0.27</i> | <i>0.29</i> |

**Table S110.** Relative to the CCSD/BBC1 data, errors (part a) and averaged absolute errors (part b) in  $\Delta E_{int}^{A,B}$  (kcal mol<sup>-1</sup>) obtained for the **Lin** → **Ecl** structural change at the indicated levels of theory.

| <b>Part a</b>     |               | <b>HF</b>                       | <b>B3LYP</b> | <b>B3LYP-GD3</b> | <b>MP2/Müller</b> |
|-------------------|---------------|---------------------------------|--------------|------------------|-------------------|
| <b>Atom A</b>     | <b>Atom B</b> | Error in $\Delta E_{int}^{A,B}$ |              |                  |                   |
| C2                | C1            | 2.61                            | 0.43         | 0.29             | 0.56              |
| O4                | C1            | -6.77                           | -2.10        | -1.66            | -0.51             |
| H7                | C1            | -2.12                           | 0.24         | 0.25             | 0.07              |
| H9                | C1            | -2.11                           | 0.22         | 0.24             | 0.06              |
| O3                | C2            | -6.67                           | -2.08        | -1.65            | -0.54             |
| H8                | C2            | -2.12                           | 0.25         | 0.26             | 0.09              |
| H10               | C2            | -2.11                           | 0.22         | 0.25             | 0.07              |
| H6                | O3            | -1.00                           | -0.78        | -0.73            | 0.07              |
| H5                | O4            | -1.00                           | -0.79        | -0.73            | 0.08              |
| O4                | O3            | 9.97                            | 0.98         | 0.76             | 0.96              |
| <i>Average:</i>   |               | <i>-1.13</i>                    | <i>-0.34</i> | <i>-0.27</i>     | <i>0.09</i>       |
| <i>Std. dev.:</i> |               | <i>4.76</i>                     | <i>1.06</i>  | <i>0.86</i>      | <i>0.44</i>       |

  

| <b>Part b</b>     | Averaged absolute error in $\Delta E_{int}^{A,B}$ |             |             |             |
|-------------------|---------------------------------------------------|-------------|-------------|-------------|
| <i>Average:</i>   | <i>3.65</i>                                       | <i>0.81</i> | <i>0.68</i> | <i>0.30</i> |
| <i>Std. dev.:</i> | <i>3.04</i>                                       | <i>0.73</i> | <i>0.56</i> | <i>0.32</i> |

**Table S111.** Relative to the CCSD/BBC1 data, errors (part a) and averaged absolute errors (part b) in  $\Delta V_{\text{cl}}^{\text{A,B}}$  (kcal mol<sup>-1</sup>) obtained for the **Lin** → **Ecl** structural change at the indicated levels of theory.

| <b>Part a</b>     |               | <b>HF</b>                                    | <b>B3LYP</b> | <b>B3LYP-GD3</b> | <b>MP2/Müller</b> |
|-------------------|---------------|----------------------------------------------|--------------|------------------|-------------------|
| <b>Atom A</b>     | <b>Atom B</b> | Error in $\Delta V_{\text{cl}}^{\text{A,B}}$ |              |                  |                   |
| C2                | C1            | 3.18                                         | 0.37         | 0.05             | 0.29              |
| O4                | C1            | -6.34                                        | -1.43        | -1.02            | -0.51             |
| H7                | C1            | -2.38                                        | 0.52         | 0.55             | 0.28              |
| H9                | C1            | -2.38                                        | 0.52         | 0.55             | 0.28              |
| O3                | C2            | -6.17                                        | -1.37        | -0.96            | -0.51             |
| H8                | C2            | -2.37                                        | 0.52         | 0.54             | 0.27              |
| H10               | C2            | -2.37                                        | 0.52         | 0.55             | 0.28              |
| H6                | O3            | -0.75                                        | -0.75        | -0.71            | 0.20              |
| H5                | O4            | -0.75                                        | -0.76        | -0.72            | 0.21              |
| H6                | O4            | 6.99                                         | -1.09        | -1.32            | -0.05             |
| <i>Average:</i>   |               | <i>-1.34</i>                                 | <i>-0.29</i> | <i>-0.25</i>     | <i>0.07</i>       |
| <i>Std. dev.:</i> |               | <i>3.99</i>                                  | <i>0.86</i>  | <i>0.77</i>      | <i>0.32</i>       |

  

| <b>Part b</b>     |  | Averaged absolute error in $\Delta V_{\text{cl}}^{\text{A,B}}$ |             |             |             |
|-------------------|--|----------------------------------------------------------------|-------------|-------------|-------------|
| <i>Average:</i>   |  | <i>3.37</i>                                                    | <i>0.78</i> | <i>0.70</i> | <i>0.29</i> |
| <i>Std. dev.:</i> |  | <i>2.30</i>                                                    | <i>0.38</i> | <i>0.35</i> | <i>0.14</i> |

**Table S112.** Relative to the CCSD/BBC1 data, errors (part a) and averaged absolute errors (part b) in  $\Delta V_{\text{XC}}^{\text{A,B}}$  (kcal mol<sup>-1</sup>) obtained for the **Lin** → **Ecl** structural change at the indicated levels of theory.

| <b>Part a</b>     |               | <b>HF</b>                                    | <b>B3LYP</b> | <b>B3LYP-GD3</b> | <b>MP2/Müller</b> |
|-------------------|---------------|----------------------------------------------|--------------|------------------|-------------------|
| <b>Atom A</b>     | <b>Atom B</b> | Error in $\Delta V_{\text{XC}}^{\text{A,B}}$ |              |                  |                   |
| C2                | C1            | -0.57                                        | 0.06         | 0.24             | 0.28              |
| O4                | C1            | -0.43                                        | -0.67        | -0.64            | 0.00              |
| H7                | C1            | 0.26                                         | -0.28        | -0.30            | -0.20             |
| H9                | C1            | 0.27                                         | -0.30        | -0.30            | -0.22             |
| O3                | C2            | -0.50                                        | -0.71        | -0.68            | -0.04             |
| H8                | C2            | 0.25                                         | -0.27        | -0.28            | -0.19             |
| H10               | C2            | 0.27                                         | -0.30        | -0.30            | -0.21             |
| H6                | O3            | -0.25                                        | -0.03        | -0.01            | -0.13             |
| H5                | O4            | -0.25                                        | -0.03        | -0.02            | -0.13             |
| H6                | O4            | 2.98                                         | 2.07         | 2.08             | 1.01              |
| <i>Average:</i>   |               | <i>0.20</i>                                  | <i>-0.05</i> | <i>-0.02</i>     | <i>0.02</i>       |
| <i>Std. dev.:</i> |               | <i>1.03</i>                                  | <i>0.78</i>  | <i>0.79</i>      | <i>0.38</i>       |

  

| <b>Part b</b>     |  | Averaged absolute error in $\Delta V_{\text{XC}}^{\text{A,B}}$ |             |             |             |
|-------------------|--|----------------------------------------------------------------|-------------|-------------|-------------|
| <i>Average:</i>   |  | <i>0.60</i>                                                    | <i>0.47</i> | <i>0.49</i> | <i>0.24</i> |
| <i>Std. dev.:</i> |  | <i>0.84</i>                                                    | <i>0.61</i> | <i>0.60</i> | <i>0.28</i> |

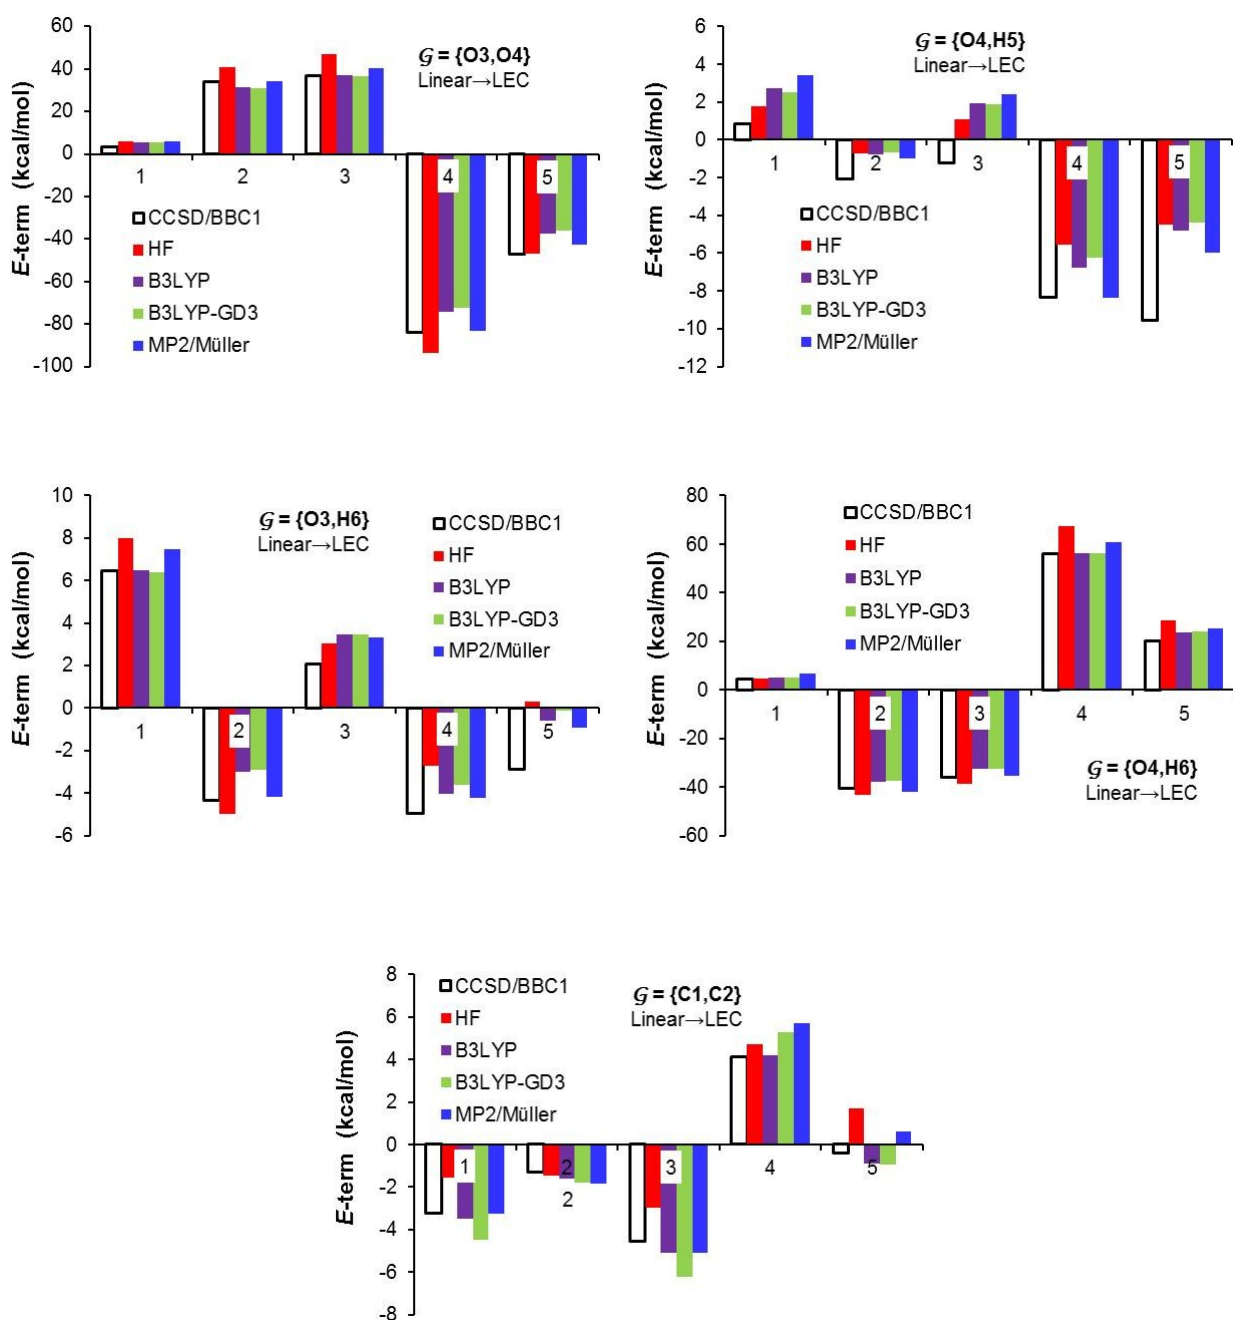

**Figure S13.** FAMSEC energy terms  $\Delta E_{\text{self}}^G$  (1),  $\Delta E_{\text{int}}^G$  (2),  $E_{\text{attr-loc}}^G$  (3),  $\Delta E_{\text{int}}^{G,H}$  (4) and  $E_{\text{attr-mol}}^G$  (5) computed for the specified molecular 2-atom fragments  $G$  on the **Lin**  $\rightarrow$  **LEC** structural change of glycol at the indicated levels of theory. Data obtained at the CCSD/BBC1 level is shown as a reference (for comparison).

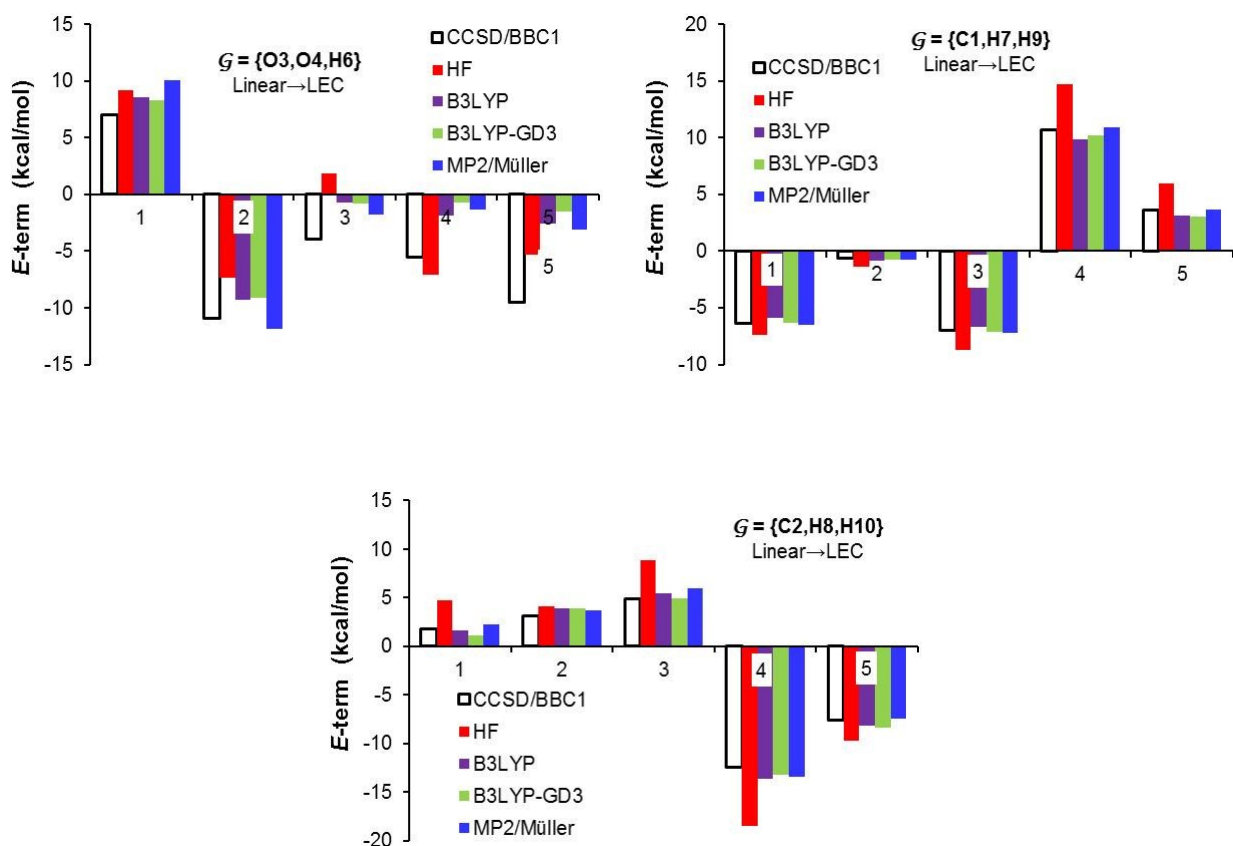

**Figure S14.** FAMSEC energy terms  $\Delta E_{\text{self}}^G$  (1),  $\Delta E_{\text{int}}^G$  (2),  $E_{\text{attr-loc}}^G$  (3),  $\Delta E_{\text{int}}^{G,H}$  (4) and  $E_{\text{attr-mol}}^G$  (5) computed for the specified molecular 3-atom fragments  $G$  on the **Lin**  $\rightarrow$  **LEC** structural change of glycol at the indicated levels of theory. Data obtained at the CCSD/BBC1 level is shown as a reference (for comparison).

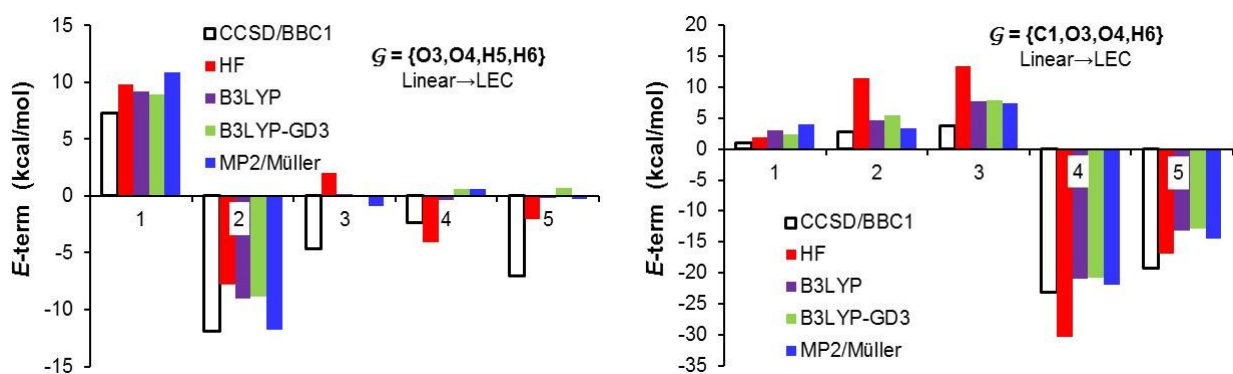

**Figure S15.** FAMSEC energy terms  $\Delta E_{\text{self}}^G$  (1),  $\Delta E_{\text{int}}^G$  (2),  $E_{\text{attr-loc}}^G$  (3),  $\Delta E_{\text{int}}^{G,H}$  (4) and  $E_{\text{attr-mol}}^G$  (5) computed for the specified molecular 4-atom fragments  $G$  on the **Lin**  $\rightarrow$  **LEC** structural change of glycol at the indicated levels of theory. Data obtained at the CCSD/BBC1 level is shown as a reference (for comparison).

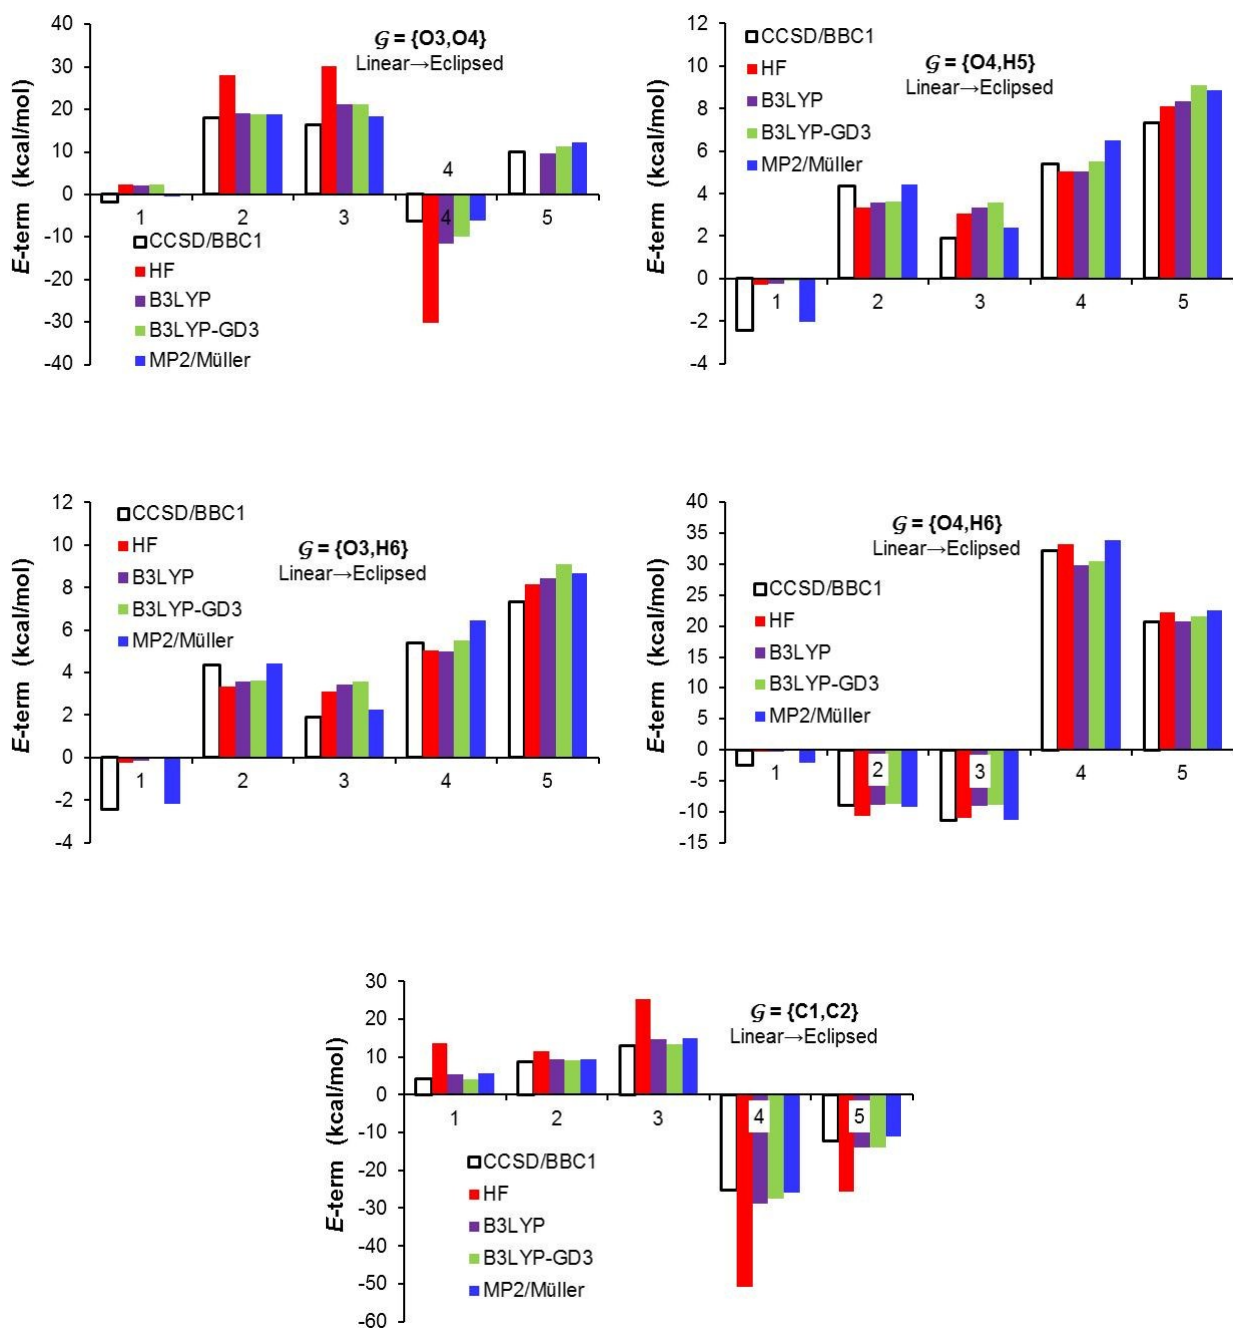

**Figure S16.** Energy terms  $\Delta E_{\text{self}}^G$  (1),  $\Delta E_{\text{int}}^G$  (2),  $E_{\text{attr-loc}}^G$  (3),  $\Delta E_{\text{int}}^{G,H}$  (4) and  $E_{\text{attr-mol}}^G$  (5) computed for the specified molecular 2-atom fragments  $G$  on the **Lin**  $\rightarrow$  **Ecl** structural change of glycol at the indicated levels of theory. Data obtained at the CCSD/BBC1 level is shown as a reference (for comparison).



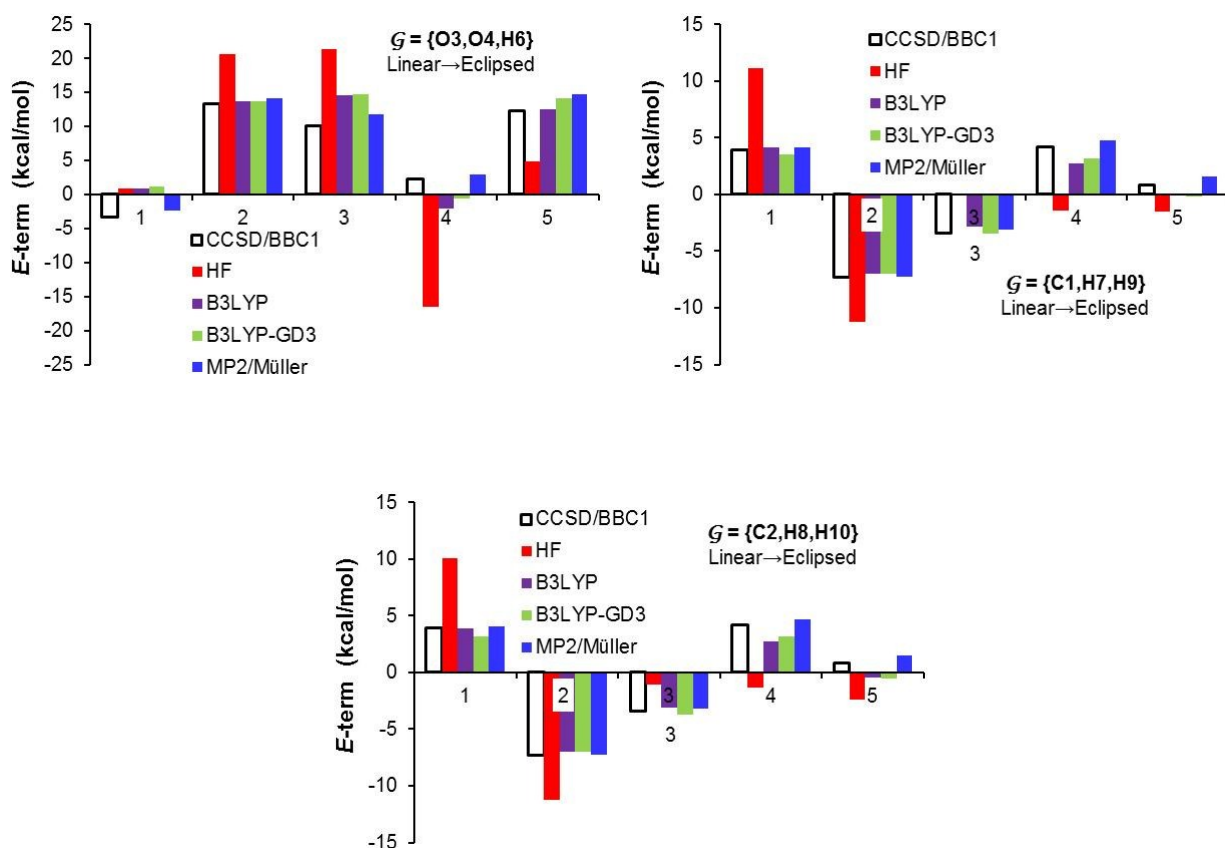

**Figure S17.** FAMSEC energy terms  $\Delta E_{\text{self}}^G$  (1),  $\Delta E_{\text{int}}^G$  (2),  $E_{\text{attr-loc}}^G$  (3),  $\Delta E_{\text{int}}^{G,H}$  (4) and  $E_{\text{attr-mol}}^G$  (5) computed for the specified molecular 3-atom fragments  $G$  on the **Lin**  $\rightarrow$  **Ecl** structural change of glycol at the indicated levels of theory. Data obtained at the CCSD/BBC1 level is shown as a reference (for comparison).

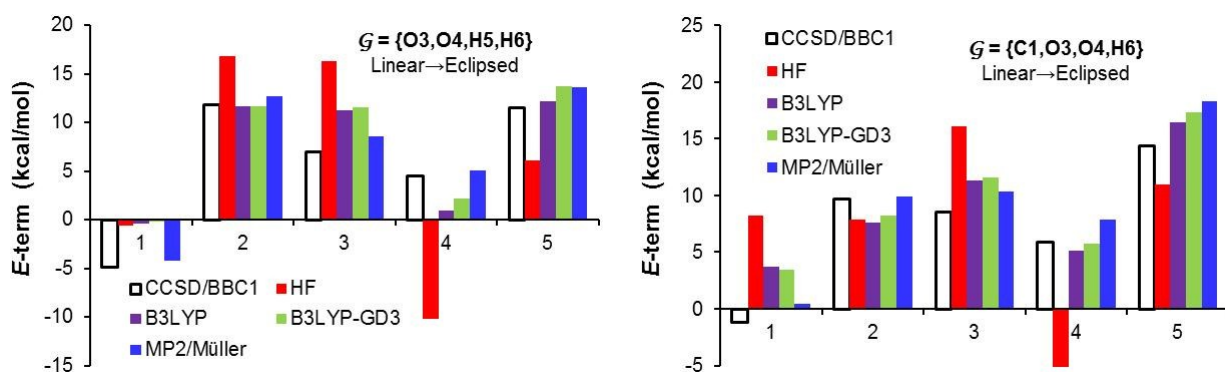

**Figure S18.** FAMSEC energy terms  $\Delta E_{\text{self}}^G$  (1),  $\Delta E_{\text{int}}^G$  (2),  $E_{\text{attr-loc}}^G$  (3),  $\Delta E_{\text{int}}^{G,H}$  (4) and  $E_{\text{attr-mol}}^G$  (5) computed for the specified molecular 4-atom fragments  $G$  on the **Lin**  $\rightarrow$  **Ecl** structural change of glycol at the indicated levels of theory. Data obtained at the CCSD/BBC1 level is shown as a reference (for comparison).

**Table S113.** FAMSEC descriptors (values in kcal mol<sup>-1</sup>) computed at the indicated levels of theory for specified and meaningful 2-atom fragments G of glycol (PART 1–5) on the **Lin** → **LEC** structural change.

| PART 1                                       |                                     | <b>G = {O3,O4}</b>                 |                                  |                                      |                                  |
|----------------------------------------------|-------------------------------------|------------------------------------|----------------------------------|--------------------------------------|----------------------------------|
| <b>LoT</b>                                   | $\Delta E_{\text{self}}^{\text{G}}$ | $\Delta E_{\text{int}}^{\text{G}}$ | $E_{\text{attr-loc}}^{\text{G}}$ | $\Delta E_{\text{int}}^{\text{G,H}}$ | $E_{\text{attr-mol}}^{\text{G}}$ |
| CCSD/BBC1                                    | 3.13                                | 33.90                              | 37.03                            | -84.18                               | -47.14                           |
| HF                                           | 5.86                                | 40.91                              | 46.77                            | -93.59                               | -46.82                           |
| B3LYP                                        | 5.57                                | 31.46                              | 37.03                            | -74.35                               | -37.31                           |
| B3LYP-GD3                                    | 5.40                                | 31.18                              | 36.59                            | -72.55                               | -35.96                           |
| MP2/Müller                                   | 6.14                                | 34.46                              | 40.60                            | -83.06                               | -42.47                           |
| <i>Average:</i>                              | <i>5.2</i>                          | <i>34.4</i>                        | <i>39.6</i>                      | <i>-81.5</i>                         | <i>-41.9</i>                     |
| <i>Std. dev.:</i>                            | <i>1.2</i>                          | <i>3.9</i>                         | <i>4.3</i>                       | <i>8.5</i>                           | <i>5.2</i>                       |
| Excluding HF data                            |                                     |                                    |                                  |                                      |                                  |
| <i>Average:</i>                              | <i>5.1</i>                          | <i>32.8</i>                        | <i>37.8</i>                      | <i>-78.5</i>                         | <i>-40.7</i>                     |
| <i>Std. dev.:</i>                            | <i>1.3</i>                          | <i>1.7</i>                         | <i>1.9</i>                       | <i>5.9</i>                           | <i>5.1</i>                       |
| Combined CCSD/BBC1, B3LYP and B3LYP-GD3 data |                                     |                                    |                                  |                                      |                                  |
| <i>Average:</i>                              | <i>4.7</i>                          | <i>32.2</i>                        | <i>36.9</i>                      | <i>-77.0</i>                         | <i>-40.1</i>                     |
| <i>Std. dev.:</i>                            | <i>1.4</i>                          | <i>1.5</i>                         | <i>0.3</i>                       | <i>6.3</i>                           | <i>6.1</i>                       |

  

| PART 2                                       |                                     | <b>G = {O4,H5}</b>                 |                                  |                                      |                                  |
|----------------------------------------------|-------------------------------------|------------------------------------|----------------------------------|--------------------------------------|----------------------------------|
| <b>LoT</b>                                   | $\Delta E_{\text{self}}^{\text{G}}$ | $\Delta E_{\text{int}}^{\text{G}}$ | $E_{\text{attr-loc}}^{\text{G}}$ | $\Delta E_{\text{int}}^{\text{G,H}}$ | $E_{\text{attr-mol}}^{\text{G}}$ |
| CCSD/BBC1                                    | 0.85                                | -2.09                              | -1.24                            | -8.33                                | -9.58                            |
| HF                                           | 1.77                                | -0.70                              | 1.08                             | -5.57                                | -4.49                            |
| B3LYP                                        | 2.72                                | -0.75                              | 1.96                             | -6.76                                | -4.80                            |
| B3LYP-GD3                                    | 2.54                                | -0.68                              | 1.87                             | -6.22                                | -4.36                            |
| MP2/Müller                                   | 3.40                                | -1.01                              | 2.39                             | -8.37                                | -5.98                            |
| <i>Average:</i>                              | <i>2.3</i>                          | <i>-1.0</i>                        | <i>1.2</i>                       | <i>-7.1</i>                          | <i>-5.8</i>                      |
| <i>Std. dev.:</i>                            | <i>1.0</i>                          | <i>0.6</i>                         | <i>1.5</i>                       | <i>1.3</i>                           | <i>2.2</i>                       |
| Excluding HF data                            |                                     |                                    |                                  |                                      |                                  |
| <i>Average:</i>                              | <i>2.4</i>                          | <i>-1.1</i>                        | <i>1.2</i>                       | <i>-7.4</i>                          | <i>-6.2</i>                      |
| <i>Std. dev.:</i>                            | <i>1.1</i>                          | <i>0.7</i>                         | <i>1.7</i>                       | <i>1.1</i>                           | <i>2.4</i>                       |
| Combined CCSD/BBC1, B3LYP and B3LYP-GD3 data |                                     |                                    |                                  |                                      |                                  |
| <i>Average:</i>                              | <i>2.0</i>                          | <i>-1.2</i>                        | <i>0.9</i>                       | <i>-7.1</i>                          | <i>-6.2</i>                      |
| <i>Std. dev.:</i>                            | <i>1.0</i>                          | <i>0.8</i>                         | <i>1.8</i>                       | <i>1.1</i>                           | <i>2.9</i>                       |

## PART 3

**G = {O3,H6}**

| <b>LoT</b>                                   | $\Delta E_{\text{self}}^{\text{G}}$ | $\Delta E_{\text{int}}^{\text{G}}$ | $E_{\text{attr-loc}}^{\text{G}}$ | $\Delta E_{\text{int}}^{\text{G,H}}$ | $E_{\text{attr-mol}}^{\text{G}}$ |
|----------------------------------------------|-------------------------------------|------------------------------------|----------------------------------|--------------------------------------|----------------------------------|
| CCSD/BBC1                                    | 6.44                                | -4.36                              | 2.08                             | -4.98                                | -2.89                            |
| HF                                           | 8.00                                | -4.97                              | 3.03                             | -2.73                                | 0.31                             |
| B3LYP                                        | 6.47                                | -3.00                              | 3.47                             | -4.06                                | -0.59                            |
| B3LYP-GD3                                    | 6.39                                | -2.93                              | 3.46                             | -3.59                                | -0.14                            |
| MP2/Müller                                   | 7.47                                | -4.17                              | 3.30                             | -4.23                                | -0.92                            |
| <i>Average:</i>                              | <i>7.0</i>                          | <i>-3.9</i>                        | <i>3.1</i>                       | <i>-3.9</i>                          | <i>-0.8</i>                      |
| <i>Std. dev.:</i>                            | <i>0.7</i>                          | <i>0.9</i>                         | <i>0.6</i>                       | <i>0.8</i>                           | <i>1.2</i>                       |
| Excluding HF data                            |                                     |                                    |                                  |                                      |                                  |
| <i>Average:</i>                              | <i>6.7</i>                          | <i>-3.6</i>                        | <i>3.1</i>                       | <i>-4.2</i>                          | <i>-1.1</i>                      |
| <i>Std. dev.:</i>                            | <i>0.5</i>                          | <i>0.8</i>                         | <i>0.7</i>                       | <i>0.6</i>                           | <i>1.2</i>                       |
| Combined CCSD/BBC1, B3LYP and B3LYP-GD3 data |                                     |                                    |                                  |                                      |                                  |
| <i>Average:</i>                              | <b><i>6.4</i></b>                   | <b><i>-3.4</i></b>                 | <b><i>3.0</i></b>                | <b><i>-4.2</i></b>                   | <b><i>-1.2</i></b>               |
| <i>Std. dev.:</i>                            | <b><i>0.0</i></b>                   | <b><i>0.8</i></b>                  | <b><i>0.8</i></b>                | <b><i>0.7</i></b>                    | <b><i>1.5</i></b>                |

## PART 4

**G = {O4,H6}**

| <b>LoT</b>                                   | $\Delta E_{\text{self}}^{\text{G}}$ | $\Delta E_{\text{int}}^{\text{G}}$ | $E_{\text{attr-loc}}^{\text{G}}$ | $\Delta E_{\text{int}}^{\text{G,H}}$ | $E_{\text{attr-mol}}^{\text{G}}$ |
|----------------------------------------------|-------------------------------------|------------------------------------|----------------------------------|--------------------------------------|----------------------------------|
| CCSD/BBC1                                    | 4.47                                | -40.52                             | -36.05                           | 56.11                                | 20.06                            |
| HF                                           | 4.56                                | -43.32                             | -38.76                           | 67.33                                | 28.57                            |
| B3LYP                                        | 5.10                                | -37.73                             | -32.64                           | 56.22                                | 23.58                            |
| B3LYP-GD3                                    | 4.91                                | -37.41                             | -32.50                           | 56.36                                | 23.87                            |
| MP2/Müller                                   | 6.56                                | -42.19                             | -35.63                           | 60.87                                | 25.24                            |
| <i>Average:</i>                              | <i>5.1</i>                          | <i>-40.2</i>                       | <i>-35.1</i>                     | <i>59.4</i>                          | <i>24.3</i>                      |
| <i>Std. dev.:</i>                            | <i>0.8</i>                          | <i>2.6</i>                         | <i>2.6</i>                       | <i>4.9</i>                           | <i>3.1</i>                       |
| Excluding HF data                            |                                     |                                    |                                  |                                      |                                  |
| <i>Average:</i>                              | <i>5.3</i>                          | <i>-39.5</i>                       | <i>-34.2</i>                     | <i>57.4</i>                          | <i>23.2</i>                      |
| <i>Std. dev.:</i>                            | <i>0.9</i>                          | <i>2.3</i>                         | <i>1.9</i>                       | <i>2.3</i>                           | <i>2.2</i>                       |
| Combined CCSD/BBC1, B3LYP and B3LYP-GD3 data |                                     |                                    |                                  |                                      |                                  |
| <i>Average:</i>                              | <b><i>4.8</i></b>                   | <b><i>-38.6</i></b>                | <b><i>-33.7</i></b>              | <b><i>56.2</i></b>                   | <b><i>22.5</i></b>               |
| <i>Std. dev.:</i>                            | <b><i>0.3</i></b>                   | <b><i>1.7</i></b>                  | <b><i>2.0</i></b>                | <b><i>0.1</i></b>                    | <b><i>2.1</i></b>                |

## PART 5

 $G = \{C1, C2\}$ 

| LoT                                          | $\Delta E_{\text{self}}^G$ | $\Delta E_{\text{int}}^G$ | $E_{\text{attr-loc}}^G$ | $\Delta E_{\text{int}}^{G,H}$ | $E_{\text{attr-mol}}^G$ |
|----------------------------------------------|----------------------------|---------------------------|-------------------------|-------------------------------|-------------------------|
| CCSD/BBC1                                    | -3.24                      | -1.32                     | -4.56                   | 4.15                          | -0.41                   |
| HF                                           | -1.55                      | -1.44                     | -3.00                   | 4.70                          | 1.71                    |
| B3LYP                                        | -3.50                      | -1.59                     | -5.09                   | 4.21                          | -0.88                   |
| B3LYP-GD3                                    | -4.47                      | -1.78                     | -6.25                   | 5.30                          | -0.94                   |
| MP2/Müller                                   | -3.27                      | -1.84                     | -5.11                   | 5.71                          | 0.60                    |
| <i>Average:</i>                              | <i>-3.2</i>                | <i>-1.6</i>               | <i>-4.8</i>             | <i>4.8</i>                    | <i>0.0</i>              |
| <i>Std. dev.:</i>                            | <i>1.1</i>                 | <i>0.2</i>                | <i>1.2</i>              | <i>0.7</i>                    | <i>1.1</i>              |
| Excluding HF data                            |                            |                           |                         |                               |                         |
| <i>Average:</i>                              | <i>-3.6</i>                | <i>-1.6</i>               | <i>-5.3</i>             | <i>4.8</i>                    | <i>-0.4</i>             |
| <i>Std. dev.:</i>                            | <i>0.6</i>                 | <i>0.2</i>                | <i>0.7</i>              | <i>0.8</i>                    | <i>0.7</i>              |
| Combined CCSD/BBC1, B3LYP and B3LYP-GD3 data |                            |                           |                         |                               |                         |
| <i>Average:</i>                              | <i>-3.7</i>                | <i>-1.6</i>               | <i>-5.3</i>             | <i>4.6</i>                    | <i>-0.7</i>             |
| <i>Std. dev.:</i>                            | <i>0.6</i>                 | <i>0.2</i>                | <i>0.9</i>              | <i>0.6</i>                    | <i>0.3</i>              |

**Table S114.** FAMSEC descriptors (values in kcal mol<sup>-1</sup>) computed at the indicated levels of theory for specified and meaningful 3-atom fragments G of glycol (PART 1–3) on the **Lin** → **LEC** structural change.

## PART 1

 $G = \{O3, O4, H6\}$ 

| LoT                                          | $\Delta E_{\text{self}}^G$ | $\Delta E_{\text{int}}^G$ | $E_{\text{attr-loc}}^G$ | $\Delta E_{\text{int}}^{G,H}$ | $E_{\text{attr-mol}}^G$ |
|----------------------------------------------|----------------------------|---------------------------|-------------------------|-------------------------------|-------------------------|
| CCSD/BBC1                                    | 7.02                       | -10.97                    | -3.95                   | -5.55                         | -9.50                   |
| HF                                           | 9.21                       | -7.38                     | 1.83                    | -7.11                         | -5.28                   |
| B3LYP                                        | 8.57                       | -9.28                     | -0.71                   | -1.82                         | -2.53                   |
| B3LYP-GD3                                    | 8.35                       | -9.16                     | -0.80                   | -0.73                         | -1.53                   |
| MP2/Müller                                   | 10.08                      | -11.89                    | -1.81                   | -1.32                         | -3.13                   |
| <i>Average:</i>                              | <i>8.6</i>                 | <i>-9.7</i>               | <i>-1.1</i>             | <i>-3.3</i>                   | <i>-4.4</i>             |
| <i>Std. dev.:</i>                            | <i>1.1</i>                 | <i>1.8</i>                | <i>2.1</i>              | <i>2.8</i>                    | <i>3.2</i>              |
| Excluding HF data                            |                            |                           |                         |                               |                         |
| <i>Average:</i>                              | <i>8.5</i>                 | <i>-10.3</i>              | <i>-1.8</i>             | <i>-2.4</i>                   | <i>-4.2</i>             |
| <i>Std. dev.:</i>                            | <i>1.3</i>                 | <i>1.3</i>                | <i>1.5</i>              | <i>2.2</i>                    | <i>3.6</i>              |
| Combined CCSD/BBC1, B3LYP and B3LYP-GD3 data |                            |                           |                         |                               |                         |
| <i>Average:</i>                              | <i>8.0</i>                 | <i>-9.8</i>               | <i>-1.8</i>             | <i>-2.7</i>                   | <i>-4.5</i>             |
| <i>Std. dev.:</i>                            | <i>0.8</i>                 | <i>1.0</i>                | <i>1.8</i>              | <i>2.5</i>                    | <i>4.3</i>              |

## PART 2

**G = {C1,H7,H9}**

| <b>LoT</b>                                   | $\Delta E_{\text{self}}^{\text{G}}$ | $\Delta E_{\text{int}}^{\text{G}}$ | $E_{\text{attr-loc}}^{\text{G}}$ | $\Delta E_{\text{int}}^{\text{G,H}}$ | $E_{\text{attr-mol}}^{\text{G}}$ |
|----------------------------------------------|-------------------------------------|------------------------------------|----------------------------------|--------------------------------------|----------------------------------|
| CCSD/BBC1                                    | -6.37                               | -0.63                              | -7.00                            | 10.67                                | 3.66                             |
| HF                                           | -7.38                               | -1.36                              | -8.73                            | 14.71                                | 5.98                             |
| B3LYP                                        | -5.87                               | -0.83                              | -6.71                            | 9.87                                 | 3.16                             |
| B3LYP-GD3                                    | -6.34                               | -0.79                              | -7.13                            | 10.17                                | 3.05                             |
| MP2/Müller                                   | -6.47                               | -0.71                              | -7.19                            | 10.89                                | 3.70                             |
| <i>Average:</i>                              | <i>-6.5</i>                         | <i>-0.9</i>                        | <i>-7.4</i>                      | <i>11.3</i>                          | <i>3.9</i>                       |
| <i>Std. dev.:</i>                            | <i>0.5</i>                          | <i>0.3</i>                         | <i>0.8</i>                       | <i>2.0</i>                           | <i>1.2</i>                       |
| Excluding HF data                            |                                     |                                    |                                  |                                      |                                  |
| <i>Average:</i>                              | <i>-6.3</i>                         | <i>-0.7</i>                        | <i>-7.0</i>                      | <i>10.4</i>                          | <i>3.4</i>                       |
| <i>Std. dev.:</i>                            | <i>0.3</i>                          | <i>0.1</i>                         | <i>0.2</i>                       | <i>0.5</i>                           | <i>0.3</i>                       |
| Combined CCSD/BBC1, B3LYP and B3LYP-GD3 data |                                     |                                    |                                  |                                      |                                  |
| <i>Average:</i>                              | <i>-6.2</i>                         | <i>-0.8</i>                        | <i>-6.9</i>                      | <i>10.2</i>                          | <i>3.3</i>                       |
| <i>Std. dev.:</i>                            | <i>0.3</i>                          | <i>0.1</i>                         | <i>0.2</i>                       | <i>0.4</i>                           | <i>0.3</i>                       |

## PART 3

**G = {C2,H8,H10}**

| <b>LoT</b>                                   | $\Delta E_{\text{self}}^{\text{G}}$ | $\Delta E_{\text{int}}^{\text{G}}$ | $E_{\text{attr-loc}}^{\text{G}}$ | $\Delta E_{\text{int}}^{\text{G,H}}$ | $E_{\text{attr-mol}}^{\text{G}}$ |
|----------------------------------------------|-------------------------------------|------------------------------------|----------------------------------|--------------------------------------|----------------------------------|
| CCSD/BBC1                                    | 1.74                                | 3.11                               | 4.85                             | -12.50                               | -7.65                            |
| HF                                           | 4.73                                | 4.10                               | 8.84                             | -18.55                               | -9.71                            |
| B3LYP                                        | 1.61                                | 3.86                               | 5.47                             | -13.61                               | -8.14                            |
| B3LYP-GD3                                    | 1.07                                | 3.87                               | 4.93                             | -13.27                               | -8.34                            |
| MP2/Müller                                   | 2.26                                | 3.72                               | 5.97                             | -13.43                               | -7.46                            |
| <i>Average:</i>                              | <i>2.3</i>                          | <i>3.7</i>                         | <i>6.0</i>                       | <i>-14.3</i>                         | <i>-8.3</i>                      |
| <i>Std. dev.:</i>                            | <i>1.4</i>                          | <i>0.4</i>                         | <i>1.6</i>                       | <i>2.4</i>                           | <i>0.9</i>                       |
| Excluding HF data                            |                                     |                                    |                                  |                                      |                                  |
| <i>Average:</i>                              | <i>1.7</i>                          | <i>3.6</i>                         | <i>5.3</i>                       | <i>-13.2</i>                         | <i>-7.9</i>                      |
| <i>Std. dev.:</i>                            | <i>0.5</i>                          | <i>0.4</i>                         | <i>0.5</i>                       | <i>0.5</i>                           | <i>0.4</i>                       |
| Combined CCSD/BBC1, B3LYP and B3LYP-GD3 data |                                     |                                    |                                  |                                      |                                  |
| <i>Average:</i>                              | <i>1.5</i>                          | <i>3.6</i>                         | <i>5.1</i>                       | <i>-13.1</i>                         | <i>-8.0</i>                      |
| <i>Std. dev.:</i>                            | <i>0.4</i>                          | <i>0.4</i>                         | <i>0.3</i>                       | <i>0.6</i>                           | <i>0.4</i>                       |

**Table S115.** FAMSEC descriptors (values in kcal mol<sup>-1</sup>) computed at the indicated levels of theory for specified and meaningful 4-atom fragments G of glycol (PART 1–2) on the **Lin** → **LEC** structural change.

| PART 1                                       |                                     | <b>G = {O3,O4,H5,H6}</b>           |                                  |                                      |                                  |
|----------------------------------------------|-------------------------------------|------------------------------------|----------------------------------|--------------------------------------|----------------------------------|
| <b>LoT</b>                                   | $\Delta E_{\text{self}}^{\text{G}}$ | $\Delta E_{\text{int}}^{\text{G}}$ | $E_{\text{attr-loc}}^{\text{G}}$ | $\Delta E_{\text{int}}^{\text{G,H}}$ | $E_{\text{attr-mol}}^{\text{G}}$ |
| CCSD/BBC1                                    | 7.29                                | -11.92                             | -4.63                            | -2.37                                | -7.00                            |
| HF                                           | 9.78                                | -7.78                              | 1.99                             | -4.06                                | -2.07                            |
| B3LYP                                        | 9.19                                | -9.01                              | 0.17                             | -0.31                                | -0.14                            |
| B3LYP-GD3                                    | 8.93                                | -8.81                              | 0.12                             | 0.58                                 | 0.71                             |
| MP2/Müller                                   | 10.87                               | -11.78                             | -0.91                            | 0.62                                 | -0.29                            |
| <i>Average:</i>                              | <i>9.2</i>                          | <i>-9.9</i>                        | <i>-0.6</i>                      | <i>-1.1</i>                          | <i>-1.8</i>                      |
| <i>Std. dev.:</i>                            | <i>1.3</i>                          | <i>1.9</i>                         | <i>2.5</i>                       | <i>2.0</i>                           | <i>3.1</i>                       |
| Excluding HF data                            |                                     |                                    |                                  |                                      |                                  |
| <i>Average:</i>                              | <i>9.1</i>                          | <i>-10.4</i>                       | <i>-1.3</i>                      | <i>-0.4</i>                          | <i>-1.7</i>                      |
| <i>Std. dev.:</i>                            | <i>1.5</i>                          | <i>1.7</i>                         | <i>2.3</i>                       | <i>1.4</i>                           | <i>3.6</i>                       |
| Combined CCSD/BBC1, B3LYP and B3LYP-GD3 data |                                     |                                    |                                  |                                      |                                  |
| <i>Average:</i>                              | <b><i>8.5</i></b>                   | <b><i>-9.9</i></b>                 | <b><i>-1.4</i></b>               | <b><i>-0.7</i></b>                   | <b><i>-2.1</i></b>               |
| <i>Std. dev.:</i>                            | <b><i>1.0</i></b>                   | <b><i>1.7</i></b>                  | <b><i>2.8</i></b>                | <b><i>1.5</i></b>                    | <b><i>4.2</i></b>                |

| PART 2                                       |                                     | <b>G = {C1,O3,O4,H6}</b>           |                                  |                                      |                                  |
|----------------------------------------------|-------------------------------------|------------------------------------|----------------------------------|--------------------------------------|----------------------------------|
| <b>LoT</b>                                   | $\Delta E_{\text{self}}^{\text{G}}$ | $\Delta E_{\text{int}}^{\text{G}}$ | $E_{\text{attr-loc}}^{\text{G}}$ | $\Delta E_{\text{int}}^{\text{G,H}}$ | $E_{\text{attr-mol}}^{\text{G}}$ |
| CCSD/BBC1                                    | 1.1                                 | 2.7                                | 3.8                              | -23.1                                | -19.3                            |
| HF                                           | 2.0                                 | 11.5                               | 13.5                             | -30.4                                | -16.9                            |
| B3LYP                                        | 3.1                                 | 4.7                                | 7.8                              | -21.0                                | -13.2                            |
| B3LYP-GD3                                    | 2.4                                 | 5.4                                | 7.9                              | -20.8                                | -12.9                            |
| MP2/Müller                                   | 4.1                                 | 3.4                                | 7.4                              | -21.9                                | -14.4                            |
| <i>Average:</i>                              | <i>2.5</i>                          | <i>5.6</i>                         | <i>8.1</i>                       | <i>-23.4</i>                         | <i>-15.3</i>                     |
| <i>Std. dev.:</i>                            | <i>1.1</i>                          | <i>3.5</i>                         | <i>3.5</i>                       | <i>4.0</i>                           | <i>2.7</i>                       |
| Excluding HF data                            |                                     |                                    |                                  |                                      |                                  |
| <i>Average:</i>                              | <i>2.7</i>                          | <i>4.1</i>                         | <i>6.7</i>                       | <i>-21.7</i>                         | <i>-14.9</i>                     |
| <i>Std. dev.:</i>                            | <i>1.3</i>                          | <i>1.2</i>                         | <i>2.0</i>                       | <i>1.1</i>                           | <i>3.0</i>                       |
| Combined CCSD/BBC1, B3LYP and B3LYP-GD3 data |                                     |                                    |                                  |                                      |                                  |
| <i>Average:</i>                              | <b><i>2.2</i></b>                   | <b><i>4.3</i></b>                  | <b><i>6.5</i></b>                | <b><i>-21.6</i></b>                  | <b><i>-15.1</i></b>              |
| <i>Std. dev.:</i>                            | <b><i>1.0</i></b>                   | <b><i>1.4</i></b>                  | <b><i>2.3</i></b>                | <b><i>1.3</i></b>                    | <b><i>3.6</i></b>                |

**Table S116.** FAMSEC descriptors (values in kcal mol<sup>-1</sup>) computed at the indicated levels of theory for specified and meaningful 2-atom fragments G of glycol (PART 1–5) on the **Lin** → **Ecl** structural change.

| PART 1                                       |                                     | <b>G = {O3,O4}</b>                 |                                  |                                      |                                  |
|----------------------------------------------|-------------------------------------|------------------------------------|----------------------------------|--------------------------------------|----------------------------------|
| <b>LoT</b>                                   | $\Delta E_{\text{self}}^{\text{G}}$ | $\Delta E_{\text{int}}^{\text{G}}$ | $E_{\text{attr-loc}}^{\text{G}}$ | $\Delta E_{\text{int}}^{\text{G,H}}$ | $E_{\text{attr-mol}}^{\text{G}}$ |
| CCSD/BBC1                                    | -1.68                               | 18.02                              | 16.33                            | -6.34                                | 10.00                            |
| HF                                           | 2.25                                | 27.99                              | 30.24                            | -30.21                               | 0.03                             |
| B3LYP                                        | 2.20                                | 19.02                              | 21.23                            | -11.61                               | 9.62                             |
| B3LYP-GD3                                    | 2.42                                | 18.83                              | 21.24                            | -9.91                                | 11.34                            |
| MP2/Müller                                   | -0.59                               | 18.98                              | 18.39                            | -6.08                                | 12.31                            |
| <i>Average:</i>                              | <i>0.9</i>                          | <i>20.6</i>                        | <i>21.5</i>                      | <i>-12.8</i>                         | <i>8.7</i>                       |
| <i>Std. dev.:</i>                            | <i>1.9</i>                          | <i>4.2</i>                         | <i>5.3</i>                       | <i>10.0</i>                          | <i>4.9</i>                       |
| Excluding HF data                            |                                     |                                    |                                  |                                      |                                  |
| <i>Average:</i>                              | <i>0.6</i>                          | <i>18.7</i>                        | <i>19.3</i>                      | <i>-8.5</i>                          | <i>10.8</i>                      |
| <i>Std. dev.:</i>                            | <i>2.0</i>                          | <i>0.5</i>                         | <i>2.4</i>                       | <i>2.7</i>                           | <i>1.2</i>                       |
| Combined CCSD/BBC1, B3LYP and B3LYP-GD3 data |                                     |                                    |                                  |                                      |                                  |
| <i>Average:</i>                              | <i>1.0</i>                          | <i>18.6</i>                        | <i>19.6</i>                      | <i>-9.3</i>                          | <i>10.3</i>                      |
| <i>Std. dev.:</i>                            | <i>2.3</i>                          | <i>0.5</i>                         | <i>2.8</i>                       | <i>2.7</i>                           | <i>0.9</i>                       |

| PART 2                                       |                                     | <b>G = {O4,H5}</b>                 |                                  |                                      |                                  |
|----------------------------------------------|-------------------------------------|------------------------------------|----------------------------------|--------------------------------------|----------------------------------|
| <b>LoT</b>                                   | $\Delta E_{\text{self}}^{\text{G}}$ | $\Delta E_{\text{int}}^{\text{G}}$ | $E_{\text{attr-loc}}^{\text{G}}$ | $\Delta E_{\text{int}}^{\text{G,H}}$ | $E_{\text{attr-mol}}^{\text{G}}$ |
| CCSD/BBC1                                    | -2.44                               | 4.36                               | 1.92                             | 5.39                                 | 7.30                             |
| HF                                           | -0.32                               | 3.35                               | 3.04                             | 5.05                                 | 8.09                             |
| B3LYP                                        | -0.24                               | 3.58                               | 3.34                             | 5.02                                 | 8.35                             |
| B3LYP-GD3                                    | -0.09                               | 3.64                               | 3.55                             | 5.53                                 | 9.08                             |
| MP2/Müller                                   | -2.04                               | 4.44                               | 2.40                             | 6.48                                 | 8.88                             |
| <i>Average:</i>                              | <i>-1.0</i>                         | <i>3.9</i>                         | <i>2.8</i>                       | <i>5.5</i>                           | <i>8.3</i>                       |
| <i>Std. dev.:</i>                            | <i>1.1</i>                          | <i>0.5</i>                         | <i>0.7</i>                       | <i>0.6</i>                           | <i>0.7</i>                       |
| Excluding HF data                            |                                     |                                    |                                  |                                      |                                  |
| <i>Average:</i>                              | <i>-1.2</i>                         | <i>4.0</i>                         | <i>2.8</i>                       | <i>5.6</i>                           | <i>8.4</i>                       |
| <i>Std. dev.:</i>                            | <i>1.2</i>                          | <i>0.5</i>                         | <i>0.8</i>                       | <i>0.6</i>                           | <i>0.8</i>                       |
| Combined CCSD/BBC1, B3LYP and B3LYP-GD3 data |                                     |                                    |                                  |                                      |                                  |
| <i>Average:</i>                              | <i>-0.9</i>                         | <i>3.9</i>                         | <i>2.9</i>                       | <i>5.3</i>                           | <i>8.2</i>                       |
| <i>Std. dev.:</i>                            | <i>1.3</i>                          | <i>0.4</i>                         | <i>0.9</i>                       | <i>0.3</i>                           | <i>0.9</i>                       |

## PART 3

**G = {O3,H6}**

| <b>LoT</b>                                   | $\Delta E_{\text{self}}^{\text{G}}$ | $\Delta E_{\text{int}}^{\text{G}}$ | $E_{\text{attr-loc}}^{\text{G}}$ | $\Delta E_{\text{int}}^{\text{G,H}}$ | $E_{\text{attr-mol}}^{\text{G}}$ |
|----------------------------------------------|-------------------------------------|------------------------------------|----------------------------------|--------------------------------------|----------------------------------|
| CCSD/BBC1                                    | -2.44                               | 4.36                               | 1.92                             | 5.39                                 | 7.30                             |
| HF                                           | -0.24                               | 3.36                               | 3.12                             | 5.02                                 | 8.15                             |
| B3LYP                                        | -0.17                               | 3.59                               | 3.42                             | 5.01                                 | 8.43                             |
| B3LYP-GD3                                    | -0.07                               | 3.64                               | 3.57                             | 5.52                                 | 9.09                             |
| MP2/Müller                                   | -2.18                               | 4.42                               | 2.24                             | 6.45                                 | 8.69                             |
| <i>Average:</i>                              | <i>-1.0</i>                         | <i>3.9</i>                         | <i>2.9</i>                       | <i>5.5</i>                           | <i>8.3</i>                       |
| <i>Std. dev.:</i>                            | <i>1.2</i>                          | <i>0.5</i>                         | <i>0.7</i>                       | <i>0.6</i>                           | <i>0.7</i>                       |
| Excluding HF data                            |                                     |                                    |                                  |                                      |                                  |
| <i>Average:</i>                              | <i>-1.2</i>                         | <i>4.0</i>                         | <i>2.8</i>                       | <i>5.6</i>                           | <i>8.4</i>                       |
| <i>Std. dev.:</i>                            | <i>1.3</i>                          | <i>0.4</i>                         | <i>0.8</i>                       | <i>0.6</i>                           | <i>0.8</i>                       |
| Combined CCSD/BBC1, B3LYP and B3LYP-GD3 data |                                     |                                    |                                  |                                      |                                  |
| <i>Average:</i>                              | <i><b>-0.9</b></i>                  | <i><b>3.9</b></i>                  | <i><b>3.0</b></i>                | <i><b>5.3</b></i>                    | <i><b>8.3</b></i>                |
| <i>Std. dev.:</i>                            | <i><b>1.3</b></i>                   | <i><b>0.4</b></i>                  | <i><b>0.9</b></i>                | <i><b>0.3</b></i>                    | <i><b>0.9</b></i>                |

## PART 4

**G = {O4,H6}**

| <b>LoT</b>                                   | $\Delta E_{\text{self}}^{\text{G}}$ | $\Delta E_{\text{int}}^{\text{G}}$ | $E_{\text{attr-loc}}^{\text{G}}$ | $\Delta E_{\text{int}}^{\text{G,H}}$ | $E_{\text{attr-mol}}^{\text{G}}$ |
|----------------------------------------------|-------------------------------------|------------------------------------|----------------------------------|--------------------------------------|----------------------------------|
| CCSD/BBC1                                    | -2.44                               | -9.06                              | -11.50                           | 32.22                                | 20.72                            |
| HF                                           | -0.32                               | -10.77                             | -11.09                           | 33.30                                | 22.21                            |
| B3LYP                                        | -0.24                               | -8.87                              | -9.11                            | 29.93                                | 20.82                            |
| B3LYP-GD3                                    | -0.09                               | -8.83                              | -8.92                            | 30.49                                | 21.57                            |
| MP2/Müller                                   | -2.04                               | -9.23                              | -11.27                           | 33.84                                | 22.56                            |
| <i>Average:</i>                              | <i>-1.0</i>                         | <i>-9.4</i>                        | <i>-10.4</i>                     | <i>32.0</i>                          | <i>21.6</i>                      |
| <i>Std. dev.:</i>                            | <i>1.1</i>                          | <i>0.8</i>                         | <i>1.3</i>                       | <i>1.7</i>                           | <i>0.8</i>                       |
| Excluding HF data                            |                                     |                                    |                                  |                                      |                                  |
| <i>Average:</i>                              | <i>-1.2</i>                         | <i>-9.0</i>                        | <i>-10.2</i>                     | <i>31.6</i>                          | <i>21.4</i>                      |
| <i>Std. dev.:</i>                            | <i>1.2</i>                          | <i>0.2</i>                         | <i>1.4</i>                       | <i>1.8</i>                           | <i>0.9</i>                       |
| Combined CCSD/BBC1, B3LYP and B3LYP-GD3 data |                                     |                                    |                                  |                                      |                                  |
| <i>Average:</i>                              | <i><b>-0.9</b></i>                  | <i><b>-8.9</b></i>                 | <i><b>-9.8</b></i>               | <i><b>30.9</b></i>                   | <i><b>21.0</b></i>               |
| <i>Std. dev.:</i>                            | <i><b>1.3</b></i>                   | <i><b>0.1</b></i>                  | <i><b>1.4</b></i>                | <i><b>1.2</b></i>                    | <i><b>0.5</b></i>                |



| PART 5                                       |                                     | <b>G = {C1,C2}</b>                 |                                  |                                      |                                  |
|----------------------------------------------|-------------------------------------|------------------------------------|----------------------------------|--------------------------------------|----------------------------------|
| <b>LoT</b>                                   | $\Delta E_{\text{self}}^{\text{G}}$ | $\Delta E_{\text{int}}^{\text{G}}$ | $E_{\text{attr-loc}}^{\text{G}}$ | $\Delta E_{\text{int}}^{\text{G,H}}$ | $E_{\text{attr-mol}}^{\text{G}}$ |
| CCSD/BBC1                                    | 4.13                                | 8.88                               | 13.01                            | -25.11                               | -12.10                           |
| HF                                           | 13.76                               | 11.49                              | 25.25                            | -50.92                               | -25.67                           |
| B3LYP                                        | 5.37                                | 9.32                               | 14.69                            | -28.73                               | -14.04                           |
| B3LYP-GD3                                    | 4.21                                | 9.20                               | 13.41                            | -27.48                               | -14.08                           |
| MP2/Müller                                   | 5.62                                | 9.44                               | 15.07                            | -25.97                               | -10.90                           |
| <i>Average:</i>                              | <i>6.6</i>                          | <i>9.7</i>                         | <i>16.3</i>                      | <i>-31.6</i>                         | <i>-15.4</i>                     |
| <i>Std. dev.:</i>                            | <i>4.0</i>                          | <i>1.0</i>                         | <i>5.1</i>                       | <i>10.9</i>                          | <i>5.9</i>                       |
| Excluding HF data                            |                                     |                                    |                                  |                                      |                                  |
| <i>Average:</i>                              | <i>4.8</i>                          | <i>9.2</i>                         | <i>14.0</i>                      | <i>-26.8</i>                         | <i>-12.8</i>                     |
| <i>Std. dev.:</i>                            | <i>0.8</i>                          | <i>0.2</i>                         | <i>1.0</i>                       | <i>1.6</i>                           | <i>1.6</i>                       |
| Combined CCSD/BBC1, B3LYP and B3LYP-GD3 data |                                     |                                    |                                  |                                      |                                  |
| <i>Average:</i>                              | <b><i>4.6</i></b>                   | <b><i>9.1</i></b>                  | <b><i>13.7</i></b>               | <b><i>-27.1</i></b>                  | <b><i>-13.4</i></b>              |
| <i>Std. dev.:</i>                            | <b><i>0.7</i></b>                   | <b><i>0.2</i></b>                  | <b><i>0.9</i></b>                | <b><i>1.8</i></b>                    | <b><i>1.1</i></b>                |

**Table S117.** FAMSEC descriptors (values in kcal mol<sup>-1</sup>) computed at the indicated levels of theory for specified and meaningful 3-atom fragments G of glycol (PART 1–3) on the **Lin** → **Ecl** structural change.

| PART 1                                       |                                     | <b>G = {O3,O4,H6}</b>              |                                  |                                      |                                  |
|----------------------------------------------|-------------------------------------|------------------------------------|----------------------------------|--------------------------------------|----------------------------------|
| <b>LoT</b>                                   | $\Delta E_{\text{self}}^{\text{G}}$ | $\Delta E_{\text{int}}^{\text{G}}$ | $E_{\text{attr-loc}}^{\text{G}}$ | $\Delta E_{\text{int}}^{\text{G,H}}$ | $E_{\text{attr-mol}}^{\text{G}}$ |
| CCSD/BBC1                                    | -3.28                               | 13.31                              | 10.03                            | 2.32                                 | 12.36                            |
| HF                                           | 0.85                                | 20.59                              | 21.43                            | -16.53                               | 4.90                             |
| B3LYP                                        | 0.90                                | 13.74                              | 14.64                            | -2.07                                | 12.57                            |
| B3LYP-GD3                                    | 1.13                                | 13.64                              | 14.77                            | -0.59                                | 14.18                            |
| MP2/Müller                                   | -2.41                               | 14.17                              | 11.76                            | 2.93                                 | 14.69                            |
| <i>Average:</i>                              | <i>-0.6</i>                         | <i>15.1</i>                        | <i>14.5</i>                      | <i>-2.8</i>                          | <i>11.7</i>                      |
| <i>Std. dev.:</i>                            | <i>2.1</i>                          | <i>3.1</i>                         | <i>4.3</i>                       | <i>8.0</i>                           | <i>4.0</i>                       |
| Excluding HF data                            |                                     |                                    |                                  |                                      |                                  |
| <i>Average:</i>                              | <i>-0.9</i>                         | <i>13.7</i>                        | <i>12.8</i>                      | <i>0.6</i>                           | <i>13.4</i>                      |
| <i>Std. dev.:</i>                            | <i>2.3</i>                          | <i>0.4</i>                         | <i>2.3</i>                       | <i>2.4</i>                           | <i>1.2</i>                       |
| Combined CCSD/BBC1, B3LYP and B3LYP-GD3 data |                                     |                                    |                                  |                                      |                                  |
| <i>Average:</i>                              | <b><i>-0.4</i></b>                  | <b><i>13.6</i></b>                 | <b><i>13.1</i></b>               | <b><i>-0.1</i></b>                   | <b><i>13.0</i></b>               |
| <i>Std. dev.:</i>                            | <b><i>2.5</i></b>                   | <b><i>0.2</i></b>                  | <b><i>2.7</i></b>                | <b><i>2.2</i></b>                    | <b><i>1.0</i></b>                |

## PART 2

 $G = \{C1, H7, H9\}$ 

| <b>LoT</b>                                   | $\Delta E_{\text{self}}^G$ | $\Delta E_{\text{int}}^G$ | $E_{\text{attr-loc}}^G$ | $\Delta E_{\text{int}}^{G,H}$ | $E_{\text{attr-mol}}^G$ |
|----------------------------------------------|----------------------------|---------------------------|-------------------------|-------------------------------|-------------------------|
| CCSD/BBC1                                    | 3.89                       | -7.30                     | -3.41                   | 4.22                          | 0.82                    |
| HF                                           | 11.13                      | -11.20                    | -0.07                   | -1.40                         | -1.46                   |
| B3LYP                                        | 4.20                       | -7.01                     | -2.81                   | 2.70                          | -0.12                   |
| B3LYP-GD3                                    | 3.58                       | -6.99                     | -3.42                   | 3.20                          | -0.21                   |
| MP2/Müller                                   | 4.16                       | -7.29                     | -3.14                   | 4.74                          | 1.60                    |
| <i>Average:</i>                              | <i>5.4</i>                 | <i>-8.0</i>               | <i>-2.6</i>             | <i>2.7</i>                    | <i>0.1</i>              |
| <i>Std. dev.:</i>                            | <i>3.2</i>                 | <i>1.8</i>                | <i>1.4</i>              | <i>2.4</i>                    | <i>1.2</i>              |
| Excluding HF data                            |                            |                           |                         |                               |                         |
| <i>Average:</i>                              | <i>4.0</i>                 | <i>-7.1</i>               | <i>-3.2</i>             | <i>3.7</i>                    | <i>0.5</i>              |
| <i>Std. dev.:</i>                            | <i>0.3</i>                 | <i>0.2</i>                | <i>0.3</i>              | <i>0.9</i>                    | <i>0.9</i>              |
| Combined CCSD/BBC1, B3LYP and B3LYP-GD3 data |                            |                           |                         |                               |                         |
| <i>Average:</i>                              | <b><i>3.9</i></b>          | <b><i>-7.1</i></b>        | <b><i>-3.2</i></b>      | <b><i>3.4</i></b>             | <b><i>0.2</i></b>       |
| <i>Std. dev.:</i>                            | <b><i>0.3</i></b>          | <b><i>0.2</i></b>         | <b><i>0.3</i></b>       | <b><i>0.8</i></b>             | <b><i>0.6</i></b>       |

## PART 3

 $G = \{C2, H8, H10\}$ 

| <b>LoT</b>                                   | $\Delta E_{\text{self}}^G$ | $\Delta E_{\text{int}}^G$ | $E_{\text{attr-loc}}^G$ | $\Delta E_{\text{int}}^{G,H}$ | $E_{\text{attr-mol}}^G$ |
|----------------------------------------------|----------------------------|---------------------------|-------------------------|-------------------------------|-------------------------|
| CCSD/BBC1                                    | 3.89                       | -7.30                     | -3.41                   | 4.22                          | 0.82                    |
| HF                                           | 10.12                      | -11.20                    | -1.08                   | -1.30                         | -2.38                   |
| B3LYP                                        | 3.87                       | -7.00                     | -3.12                   | 2.71                          | -0.41                   |
| B3LYP-GD3                                    | 3.22                       | -6.98                     | -3.76                   | 3.22                          | -0.54                   |
| MP2/Müller                                   | 4.05                       | -7.27                     | -3.22                   | 4.73                          | 1.51                    |
| <i>Average:</i>                              | <i>5.0</i>                 | <i>-7.9</i>               | <i>-2.9</i>             | <i>2.7</i>                    | <i>-0.2</i>             |
| <i>Std. dev.:</i>                            | <i>2.9</i>                 | <i>1.8</i>                | <i>1.1</i>              | <i>2.4</i>                    | <i>1.5</i>              |
| Excluding HF data                            |                            |                           |                         |                               |                         |
| <i>Average:</i>                              | <i>3.8</i>                 | <i>-7.1</i>               | <i>-3.4</i>             | <i>3.7</i>                    | <i>0.3</i>              |
| <i>Std. dev.:</i>                            | <i>0.4</i>                 | <i>0.2</i>                | <i>0.3</i>              | <i>0.9</i>                    | <i>1.0</i>              |
| Combined CCSD/BBC1, B3LYP and B3LYP-GD3 data |                            |                           |                         |                               |                         |
| <i>Average:</i>                              | <b><i>3.7</i></b>          | <b><i>-7.1</i></b>        | <b><i>-3.4</i></b>      | <b><i>3.4</i></b>             | <b><i>0.0</i></b>       |
| <i>Std. dev.:</i>                            | <b><i>0.4</i></b>          | <b><i>0.2</i></b>         | <b><i>0.3</i></b>       | <b><i>0.8</i></b>             | <b><i>0.8</i></b>       |

**Table S118.** FAMSEC descriptors (values in kcal mol<sup>-1</sup>) computed at the indicated levels of theory for specified and meaningful 4-atom fragments G of glycol (PART 1–2) on the **Lin** → **Ecl** structural change.

| PART 1                                       |                                     | <b>G = {O3,O4,H5,H6}</b>           |                                  |                                      |                                  |
|----------------------------------------------|-------------------------------------|------------------------------------|----------------------------------|--------------------------------------|----------------------------------|
| <b>LoT</b>                                   | $\Delta E_{\text{self}}^{\text{G}}$ | $\Delta E_{\text{int}}^{\text{G}}$ | $E_{\text{attr-loc}}^{\text{G}}$ | $\Delta E_{\text{int}}^{\text{G,H}}$ | $E_{\text{attr-mol}}^{\text{G}}$ |
| CCSD/BBC1                                    | -4.9                                | 11.8                               | 6.9                              | 4.6                                  | 11.5                             |
| HF                                           | -0.6                                | 16.9                               | 16.3                             | -10.2                                | 6.1                              |
| B3LYP                                        | -0.4                                | 11.7                               | 11.3                             | 0.9                                  | 12.2                             |
| B3LYP-GD3                                    | -0.2                                | 11.7                               | 11.5                             | 2.2                                  | 13.7                             |
| MP2/Müller                                   | -4.2                                | 12.8                               | 8.5                              | 5.1                                  | 13.7                             |
| <i>Average:</i>                              | <i>-2.0</i>                         | <i>13.0</i>                        | <i>10.9</i>                      | <i>0.5</i>                           | <i>11.4</i>                      |
| <i>Std. dev.:</i>                            | <i>2.3</i>                          | <i>2.2</i>                         | <i>3.6</i>                       | <i>6.2</i>                           | <i>3.1</i>                       |
| Excluding HF data                            |                                     |                                    |                                  |                                      |                                  |
| <i>Average:</i>                              | <i>-2.4</i>                         | <i>12.0</i>                        | <i>9.6</i>                       | <i>3.2</i>                           | <i>12.8</i>                      |
| <i>Std. dev.:</i>                            | <i>2.5</i>                          | <i>0.5</i>                         | <i>2.2</i>                       | <i>2.0</i>                           | <i>1.1</i>                       |
| Combined CCSD/BBC1, B3LYP and B3LYP-GD3 data |                                     |                                    |                                  |                                      |                                  |
| <i>Average:</i>                              | <i>-1.8</i>                         | <i>11.7</i>                        | <i>9.9</i>                       | <i>2.6</i>                           | <i>12.5</i>                      |
| <i>Std. dev.:</i>                            | <i>2.7</i>                          | <i>0.1</i>                         | <i>2.6</i>                       | <i>1.8</i>                           | <i>1.1</i>                       |

| PART 2                                       |                                     | <b>G = {C1,O3,O4,H6}</b>           |                                  |                                      |                                  |
|----------------------------------------------|-------------------------------------|------------------------------------|----------------------------------|--------------------------------------|----------------------------------|
| <b>LoT</b>                                   | $\Delta E_{\text{self}}^{\text{G}}$ | $\Delta E_{\text{int}}^{\text{G}}$ | $E_{\text{attr-loc}}^{\text{G}}$ | $\Delta E_{\text{int}}^{\text{G,H}}$ | $E_{\text{attr-mol}}^{\text{G}}$ |
| CCSD/BBC1                                    | -1.22                               | 9.71                               | 8.49                             | 5.85                                 | 14.34                            |
| HF                                           | 8.23                                | 7.87                               | 16.10                            | -5.12                                | 10.98                            |
| B3LYP                                        | 3.75                                | 7.62                               | 11.37                            | 5.11                                 | 16.47                            |
| B3LYP-GD3                                    | 3.41                                | 8.19                               | 11.60                            | 5.75                                 | 17.36                            |
| MP2/Müller                                   | 0.45                                | 9.91                               | 10.37                            | 7.90                                 | 18.27                            |
| <i>Average:</i>                              | <i>2.9</i>                          | <i>8.7</i>                         | <i>11.6</i>                      | <i>3.9</i>                           | <i>15.5</i>                      |
| <i>Std. dev.:</i>                            | <i>3.6</i>                          | <i>1.1</i>                         | <i>2.8</i>                       | <i>5.2</i>                           | <i>2.9</i>                       |
| Excluding HF data                            |                                     |                                    |                                  |                                      |                                  |
| <i>Average:</i>                              | <i>1.6</i>                          | <i>8.9</i>                         | <i>10.5</i>                      | <i>6.2</i>                           | <i>16.6</i>                      |
| <i>Std. dev.:</i>                            | <i>2.4</i>                          | <i>1.1</i>                         | <i>1.4</i>                       | <i>1.2</i>                           | <i>1.7</i>                       |
| Combined CCSD/BBC1, B3LYP and B3LYP-GD3 data |                                     |                                    |                                  |                                      |                                  |
| <i>Average:</i>                              | <i>2.0</i>                          | <i>8.5</i>                         | <i>10.5</i>                      | <i>5.6</i>                           | <i>16.1</i>                      |
| <i>Std. dev.:</i>                            | <i>2.8</i>                          | <i>1.1</i>                         | <i>1.7</i>                       | <i>0.4</i>                           | <i>1.5</i>                       |

Data obtained for the steric clash between O3 and O4 atoms in the **Ecl** conformer is shown in Figures S16-S18 and Tables S116-S118. The data reveals that, except HF, trends and general description obtained at CCSD/BBC1 were reproduced very well. To illustrate this, we combined data obtained at the CCSD/BBC1, B3LYP, B3LYP-GD3 and MP2/Müller levels for 2-atom fragment ( $G = \{O3,O4\}$ )

and two 4-atom fragments,  $G = \{C1-O3\cdots O4-H6\}$  and  $G = \{H5-O3\cdots O4-H6\}$ . Former 4-atom fragment resembles the IUPAC recommendation for H-bonds. The steric  $O3\cdots O4$  clash in the **Ecl** conformer consistently resulted in (i) unfavourable change in the inter-fragment interaction energy term,  $\Delta E_{\text{int}}^{\text{G}}$ , by  $+18.7\pm 0.5$ ,  $+8.7\pm 1.1$  and  $+12\pm 0.5$  kcal mol<sup>-1</sup> for 2- and 4-atom fragments, respectively, (ii) locally destabilized fragments with  $E_{\text{attr-loc}}^{\text{G}}$  of  $+19.3\pm 2.4$ ,  $+10.5\pm 1.4$  and  $+9.6\pm 2.2$  kcal mol<sup>-1</sup> for 2- and 4-atom fragments, respectively, (iii) more favourable environment in the case of 2-atom fragment ( $\Delta E_{\text{int}}^{\text{G,H}} = -8.5\pm 2.7$  kcal mol<sup>-1</sup>) but less favourable environment in the case of 4-atom fragments with  $\Delta E_{\text{int}}^{\text{G,H}}$  of  $6.2\pm 1.2$  and  $3.2\pm 2.0$  kcal mol<sup>-1</sup>, respectively, and (iv) fragments destabilizing the **Ecl** conformer with  $E_{\text{attr-mol}}^{\text{G}}$  of  $+10.8\pm 1.2$ ,  $16.6\pm 1.7$  and  $+12.8\pm 1.1$  kcal mol<sup>-1</sup> for 2- and 4-atom fragments, respectively.

**Table S119.** Relative to the CCSD/BBC1 data, absolute errors in the FAMSEC-defined energy terms  $\Delta E_{\text{self}}^{\text{G}}$ ,  $\Delta E_{\text{int}}^{\text{G}}$ ,  $E_{\text{attr-loc}}^{\text{G}}$ ,  $\Delta E_{\text{int}}^{\text{G,H}}$ , and  $E_{\text{attr-mol}}^{\text{G}}$  computed for the indicated and meaningful molecular fragments at the HF (part a), B3LYP (part b), B3LYP-GD3 (part c), and MP2/Müller (part d) levels on the **Lin**  $\rightarrow$  **LEC** and **Lin**  $\rightarrow$  **Ecl** structural changes of glycol. All values in kcal mol<sup>-1</sup>.

**Part a.** Data obtained at the HF level.

| Molecular fragment G                               | $\Delta E_{\text{self}}^{\text{G}}$     | $\Delta E_{\text{int}}^{\text{G}}$ | $E_{\text{attr-loc}}^{\text{G}}$ | $\Delta E_{\text{int}}^{\text{G,H}}$ | $E_{\text{attr-mol}}^{\text{G}}$ |
|----------------------------------------------------|-----------------------------------------|------------------------------------|----------------------------------|--------------------------------------|----------------------------------|
|                                                    | <b>Lin <math>\rightarrow</math> LEC</b> |                                    |                                  |                                      |                                  |
| {O3,O4}                                            | 2.73                                    | 7.00                               | 9.74                             | 9.41                                 | 0.33                             |
| {O4,H5}                                            | 0.92                                    | 1.40                               | 2.32                             | 2.77                                 | 5.09                             |
| {O3,H6}                                            | 1.56                                    | 0.61                               | 0.95                             | 2.25                                 | 3.20                             |
| {O4,H6}                                            | 0.09                                    | 2.81                               | 2.72                             | 11.22                                | 8.51                             |
| {C1,C2}                                            | 1.68                                    | 0.12                               | 1.56                             | 0.56                                 | 2.12                             |
| {O3,O4,H6}                                         | 2.19                                    | 3.59                               | 5.78                             | 1.55                                 | 4.22                             |
| {C1,H7,H9}                                         | 1.00                                    | 0.73                               | 1.73                             | 4.05                                 | 2.32                             |
| {C2,H8,H10}                                        | 2.99                                    | 0.99                               | 3.98                             | 6.04                                 | 2.06                             |
| {O3,O4,H5,H6}                                      | 2.48                                    | 4.14                               | 6.62                             | 1.69                                 | 4.93                             |
| {C1,O3,O4,H6}                                      | 0.90                                    | 8.77                               | 9.67                             | 7.29                                 | 2.38                             |
| -----                                              |                                         |                                    |                                  |                                      |                                  |
| <i>Avr.:</i>                                       | <i>1.7</i>                              | <i>3.0</i>                         | <i>4.5</i>                       | <i>4.7</i>                           | <i>3.5</i>                       |
| <i>Std. dev.:</i>                                  | <i>0.9</i>                              | <i>2.9</i>                         | <i>3.3</i>                       | <i>3.6</i>                           | <i>2.3</i>                       |
| -----                                              |                                         |                                    |                                  |                                      |                                  |
|                                                    | <b>Lin <math>\rightarrow</math> Ecl</b> |                                    |                                  |                                      |                                  |
| {O3,O4}                                            | 3.93                                    | 9.98                               | 13.91                            | 23.87                                | 9.97                             |
| {O4,H5}                                            | 2.12                                    | 1.00                               | 1.12                             | 0.34                                 | 0.78                             |
| {O3,H6}                                            | 2.20                                    | 0.99                               | 1.20                             | 0.36                                 | 0.84                             |
| {O4,H6}                                            | 2.12                                    | 1.71                               | 0.41                             | 1.08                                 | 1.49                             |
| {C1,C2}                                            | 9.63                                    | 2.61                               | 12.24                            | 25.81                                | 13.57                            |
| {O3,O4,H6}                                         | 4.13                                    | 7.27                               | 11.40                            | 18.85                                | 7.45                             |
| {C1,H7,H9}                                         | 7.24                                    | 3.90                               | 3.34                             | 5.62                                 | 2.28                             |
| {C2,H8,H10}                                        | 6.23                                    | 3.90                               | 2.33                             | 5.53                                 | 3.20                             |
| {O3,O4,H5,H6}                                      | 4.32                                    | 5.04                               | 9.36                             | 14.77                                | 5.41                             |
| {C1,O3,O4,H6}                                      | 9.45                                    | 1.84                               | 7.61                             | 10.97                                | 3.36                             |
| -----                                              |                                         |                                    |                                  |                                      |                                  |
| <i>Avr.:</i>                                       | <i>5.1</i>                              | <i>3.8</i>                         | <i>6.3</i>                       | <i>10.7</i>                          | <i>4.8</i>                       |
| <i>Std. dev.:</i>                                  | <i>2.9</i>                              | <i>2.9</i>                         | <i>5.2</i>                       | <i>9.7</i>                           | <i>4.3</i>                       |
| -----                                              |                                         |                                    |                                  |                                      |                                  |
| <b>Overall Avr.:</b>                               | <b>3.4</b>                              | <b>3.4</b>                         | <b>5.4</b>                       | <b>7.7</b>                           | <b>4.2</b>                       |
| <b>Overall Std. dev.:</b>                          | <b>2.7</b>                              | <b>2.9</b>                         | <b>4.3</b>                       | <b>7.8</b>                           | <b>3.4</b>                       |
| -----                                              |                                         |                                    |                                  |                                      |                                  |
| <b>Grand total Avr. for all energy terms:</b>      |                                         |                                    | <b>4.8</b>                       |                                      |                                  |
| <b>Grand total Std. dev. for all energy terms:</b> |                                         |                                    | <b>4.8</b>                       |                                      |                                  |

**Part b.** Data obtained at the B3LYP level.

| Molecular<br>fragment <b>G</b>                     | $\Delta E_{\text{self}}^{\text{G}}$ | $\Delta E_{\text{int}}^{\text{G}}$ | $E_{\text{attr-loc}}^{\text{G}}$ | $\Delta E_{\text{int}}^{\text{G,H}}$ | $E_{\text{attr-mol}}^{\text{G}}$ |
|----------------------------------------------------|-------------------------------------|------------------------------------|----------------------------------|--------------------------------------|----------------------------------|
|                                                    | <b>Lin → LEC</b>                    |                                    |                                  |                                      |                                  |
| {O3,O4}                                            | 2.45                                | 2.45                               | 0.00                             | 9.83                                 | 9.83                             |
| {O4,H5}                                            | 1.86                                | 1.34                               | 3.20                             | 1.58                                 | 4.78                             |
| {O3,H6}                                            | 0.03                                | 1.36                               | 1.38                             | 0.91                                 | 2.30                             |
| {O4,H6}                                            | 0.63                                | 2.78                               | 3.41                             | 0.11                                 | 3.52                             |
| {C1,C2}                                            | 0.26                                | 0.27                               | 0.54                             | 0.07                                 | 0.47                             |
| {O3,O4,H6}                                         | 1.55                                | 1.70                               | 3.25                             | 3.73                                 | 6.98                             |
| {C1,H7,H9}                                         | 0.50                                | 0.20                               | 0.30                             | 0.80                                 | 0.50                             |
| {C2,H8,H10}                                        | 0.13                                | 0.75                               | 0.62                             | 1.11                                 | 0.49                             |
| {O3,O4,H5,H6}                                      | 1.89                                | 2.91                               | 4.80                             | 2.06                                 | 6.86                             |
| {C1,O3,O4,H6}                                      | 2.02                                | 1.98                               | 4.01                             | 2.08                                 | 6.08                             |
| -----                                              |                                     |                                    |                                  |                                      |                                  |
| <i>Avr.:</i>                                       | <i>1.1</i>                          | <i>1.6</i>                         | <i>2.2</i>                       | <i>2.2</i>                           | <i>4.2</i>                       |
| <i>Std. dev.:</i>                                  | <i>0.9</i>                          | <i>1.0</i>                         | <i>1.8</i>                       | <i>2.9</i>                           | <i>3.3</i>                       |
| -----                                              |                                     |                                    |                                  |                                      |                                  |
|                                                    | <b>Lin → Ecl</b>                    |                                    |                                  |                                      |                                  |
| {O3,O4}                                            | 3.89                                | 1.00                               | 4.89                             | 5.27                                 | 0.38                             |
| {O4,H5}                                            | 2.20                                | 0.78                               | 1.42                             | 0.37                                 | 1.05                             |
| {O3,H6}                                            | 2.27                                | 0.77                               | 1.50                             | 0.38                                 | 1.13                             |
| {O4,H6}                                            | 2.20                                | 0.19                               | 2.39                             | 2.29                                 | 0.10                             |
| {C1,C2}                                            | 1.24                                | 0.44                               | 1.68                             | 3.61                                 | 1.93                             |
| {O3,O4,H6}                                         | 4.18                                | 0.43                               | 4.61                             | 4.39                                 | 0.21                             |
| {C1,H7,H9}                                         | 0.30                                | 0.29                               | 0.59                             | 1.52                                 | 0.93                             |
| {C2,H8,H10}                                        | 0.02                                | 0.30                               | 0.28                             | 1.51                                 | 1.23                             |
| {O3,O4,H5,H6}                                      | 4.47                                | 0.12                               | 4.36                             | 3.62                                 | 0.74                             |
| {C1,O3,O4,H6}                                      | 4.96                                | 2.09                               | 2.87                             | 0.74                                 | 2.13                             |
| -----                                              |                                     |                                    |                                  |                                      |                                  |
| <i>Avr.:</i>                                       | <i>2.6</i>                          | <i>0.6</i>                         | <i>2.5</i>                       | <i>2.4</i>                           | <i>1.0</i>                       |
| <i>Std. dev.:</i>                                  | <i>1.7</i>                          | <i>0.6</i>                         | <i>1.7</i>                       | <i>1.8</i>                           | <i>0.7</i>                       |
| -----                                              |                                     |                                    |                                  |                                      |                                  |
| <b>Overall Avr.:</b>                               | <b>1.9</b>                          | <b>1.1</b>                         | <b>2.3</b>                       | <b>2.3</b>                           | <b>2.6</b>                       |
| <b>Overall Std. dev.:</b>                          | <b>1.5</b>                          | <b>0.9</b>                         | <b>1.7</b>                       | <b>2.3</b>                           | <b>2.8</b>                       |
| -----                                              |                                     |                                    |                                  |                                      |                                  |
| <b>Grand total Avr. for all energy terms:</b>      |                                     |                                    | <b>2.0</b>                       |                                      |                                  |
| <b>Grand total Std. dev. for all energy terms:</b> |                                     |                                    | <b>2.0</b>                       |                                      |                                  |

Part c. Data obtained at the B3LYP-GD3 level.

| Molecular<br>fragment <b>G</b>                     | $\Delta E_{\text{self}}^{\text{G}}$ | $\Delta E_{\text{int}}^{\text{G}}$ | $E_{\text{attr-loc}}^{\text{G}}$ | $\Delta E_{\text{int}}^{\text{G,H}}$ | $E_{\text{attr-mol}}^{\text{G}}$ |
|----------------------------------------------------|-------------------------------------|------------------------------------|----------------------------------|--------------------------------------|----------------------------------|
|                                                    | <b>Lin → LEC</b>                    |                                    |                                  |                                      |                                  |
| {O3,O4}                                            | 2.28                                | 2.72                               | 0.45                             | 11.63                                | 11.18                            |
| {O4,H5}                                            | 1.69                                | 1.41                               | 3.11                             | 2.11                                 | 5.22                             |
| {O3,H6}                                            | 0.05                                | 1.43                               | 1.38                             | 1.38                                 | 2.76                             |
| {O4,H6}                                            | 0.44                                | 3.11                               | 3.55                             | 0.26                                 | 3.81                             |
| {C1,C2}                                            | 1.23                                | 0.46                               | 1.69                             | 1.15                                 | 0.53                             |
| {O3,O4,H6}                                         | 1.33                                | 1.81                               | 3.15                             | 4.82                                 | 7.97                             |
| {C1,H7,H9}                                         | 0.04                                | 0.16                               | 0.12                             | 0.49                                 | 0.61                             |
| {C2,H8,H10}                                        | 0.67                                | 0.75                               | 0.08                             | 0.77                                 | 0.69                             |
| {O3,O4,H5,H6}                                      | 1.64                                | 3.11                               | 4.75                             | 2.95                                 | 7.70                             |
| {C1,O3,O4,H6}                                      | 1.36                                | 2.70                               | 4.06                             | 2.34                                 | 6.40                             |
| -----                                              |                                     |                                    |                                  |                                      |                                  |
| <i>Avr.:</i>                                       | <i>1.1</i>                          | <i>1.8</i>                         | <i>2.2</i>                       | <i>2.8</i>                           | <i>4.7</i>                       |
| <i>Std. dev.:</i>                                  | <i>0.7</i>                          | <i>1.1</i>                         | <i>1.7</i>                       | <i>3.4</i>                           | <i>3.6</i>                       |
| -----                                              |                                     |                                    |                                  |                                      |                                  |
|                                                    | <b>Lin → Ecl</b>                    |                                    |                                  |                                      |                                  |
| {O3,O4}                                            | 4.10                                | 0.81                               | 4.91                             | 3.57                                 | 1.34                             |
| {O4,H5}                                            | 2.35                                | 0.72                               | 1.63                             | 0.14                                 | 1.78                             |
| {O3,H6}                                            | 2.37                                | 0.72                               | 1.65                             | 0.13                                 | 1.78                             |
| {O4,H6}                                            | 2.35                                | 0.23                               | 2.58                             | 1.73                                 | 0.85                             |
| {C1,C2}                                            | 0.08                                | 0.32                               | 0.40                             | 2.37                                 | 1.97                             |
| {O3,O4,H6}                                         | 4.41                                | 0.33                               | 4.74                             | 2.91                                 | 1.82                             |
| {C1,H7,H9}                                         | 0.32                                | 0.31                               | 0.01                             | 1.02                                 | 1.03                             |
| {C2,H8,H10}                                        | 0.67                                | 0.32                               | 0.36                             | 1.01                                 | 1.36                             |
| {O3,O4,H5,H6}                                      | 4.72                                | 0.11                               | 4.61                             | 2.37                                 | 2.24                             |
| {C1,O3,O4,H6}                                      | 4.63                                | 1.52                               | 3.11                             | 0.10                                 | 3.01                             |
| -----                                              |                                     |                                    |                                  |                                      |                                  |
| <i>Avr.:</i>                                       | <i>2.6</i>                          | <i>0.5</i>                         | <i>2.4</i>                       | <i>1.5</i>                           | <i>1.7</i>                       |
| <i>Std. dev.:</i>                                  | <i>1.8</i>                          | <i>0.4</i>                         | <i>1.9</i>                       | <i>1.2</i>                           | <i>0.6</i>                       |
| -----                                              |                                     |                                    |                                  |                                      |                                  |
| <b>Overall Avr.:</b>                               | <b>1.8</b>                          | <b>1.2</b>                         | <b>2.3</b>                       | <b>2.2</b>                           | <b>3.2</b>                       |
| <b>Overall Std. dev.:</b>                          | <b>1.6</b>                          | <b>1.0</b>                         | <b>1.8</b>                       | <b>2.6</b>                           | <b>3.0</b>                       |
| -----                                              |                                     |                                    |                                  |                                      |                                  |
| <b>Grand total Avr. for all energy terms:</b>      | <b>2.1</b>                          |                                    |                                  |                                      |                                  |
| <b>Grand total Std. dev. for all energy terms:</b> | <b>2.2</b>                          |                                    |                                  |                                      |                                  |

Part d. Data obtained from the MP2/Müller combination.

| Molecular<br>fragment G                            | $\Delta E_{\text{self}}^{\text{G}}$ | $\Delta E_{\text{int}}^{\text{G}}$ | $E_{\text{attr-loc}}^{\text{G}}$ | $\Delta E_{\text{int}}^{\text{G,H}}$ | $E_{\text{attr-mol}}^{\text{G}}$ |
|----------------------------------------------------|-------------------------------------|------------------------------------|----------------------------------|--------------------------------------|----------------------------------|
|                                                    | Lin → LEC                           |                                    |                                  |                                      |                                  |
| {O3,O4}                                            | 3.01                                | 0.55                               | 3.57                             | 1.11                                 | 4.68                             |
| {O4,H5}                                            | 2.55                                | 1.09                               | 3.64                             | 0.04                                 | 3.60                             |
| {O3,H6}                                            | 1.03                                | 0.19                               | 1.22                             | 0.75                                 | 1.97                             |
| {O4,H6}                                            | 2.09                                | 1.67                               | 0.42                             | 4.76                                 | 5.18                             |
| {C1,C2}                                            | 0.03                                | 0.53                               | 0.56                             | 1.57                                 | 1.01                             |
| {O3,O4,H6}                                         | 3.06                                | 0.92                               | 2.14                             | 4.23                                 | 6.37                             |
| {C1,H7,H9}                                         | 0.10                                | 0.08                               | 0.18                             | 0.22                                 | 0.04                             |
| {C2,H8,H10}                                        | 0.52                                | 0.60                               | 1.12                             | 0.93                                 | 0.19                             |
| {O3,O4,H5,H6}                                      | 3.58                                | 0.14                               | 3.72                             | 2.99                                 | 6.70                             |
| {C1,O3,O4,H6}                                      | 3.01                                | 0.62                               | 3.63                             | 1.22                                 | 4.85                             |
| -----                                              |                                     |                                    |                                  |                                      |                                  |
| <i>Avr.:</i>                                       | <i>1.9</i>                          | <i>0.6</i>                         | <i>2.0</i>                       | <i>1.8</i>                           | <i>3.5</i>                       |
| <i>Std. dev.:</i>                                  | <i>1.4</i>                          | <i>0.5</i>                         | <i>1.5</i>                       | <i>1.6</i>                           | <i>2.5</i>                       |
| -----                                              |                                     |                                    |                                  |                                      |                                  |
|                                                    | Lin → Ecl                           |                                    |                                  |                                      |                                  |
| {O3,O4}                                            | 1.09                                | 0.97                               | 2.06                             | 0.26                                 | 2.31                             |
| {O4,H5}                                            | 0.40                                | 0.08                               | 0.48                             | 1.09                                 | 1.57                             |
| {O3,H6}                                            | 0.26                                | 0.07                               | 0.32                             | 1.06                                 | 1.39                             |
| {O4,H6}                                            | 0.40                                | 0.17                               | 0.22                             | 1.62                                 | 1.84                             |
| {C1,C2}                                            | 1.49                                | 0.57                               | 2.06                             | 0.86                                 | 1.20                             |
| {O3,O4,H6}                                         | 0.87                                | 0.86                               | 1.73                             | 0.61                                 | 2.34                             |
| {C1,H7,H9}                                         | 0.26                                | 0.01                               | 0.27                             | 0.52                                 | 0.79                             |
| {C2,H8,H10}                                        | 0.16                                | 0.03                               | 0.19                             | 0.50                                 | 0.69                             |
| {O3,O4,H5,H6}                                      | 0.65                                | 0.95                               | 1.60                             | 0.56                                 | 2.16                             |
| {C1,O3,O4,H6}                                      | 1.67                                | 0.20                               | 1.87                             | 2.05                                 | 3.93                             |
| -----                                              |                                     |                                    |                                  |                                      |                                  |
| <i>Avr.:</i>                                       | <i>0.7</i>                          | <i>0.4</i>                         | <i>1.1</i>                       | <i>0.9</i>                           | <i>1.8</i>                       |
| <i>Std. dev.:</i>                                  | <i>0.5</i>                          | <i>0.4</i>                         | <i>0.8</i>                       | <i>0.6</i>                           | <i>0.9</i>                       |
| -----                                              |                                     |                                    |                                  |                                      |                                  |
| <b>Overall Avr.:</b>                               | <b>1.3</b>                          | <b>0.5</b>                         | <b>1.5</b>                       | <b>1.3</b>                           | <b>2.6</b>                       |
| <b>Overall Std. dev.:</b>                          | <b>1.2</b>                          | <b>0.5</b>                         | <b>1.3</b>                       | <b>1.3</b>                           | <b>2.0</b>                       |
| -----                                              |                                     |                                    |                                  |                                      |                                  |
| <b>Grand total Avr. for all energy terms:</b>      |                                     |                                    |                                  | <b>1.5</b>                           |                                  |
| <b>Grand total Std. dev. for all energy terms:</b> |                                     |                                    |                                  | <b>1.5</b>                           |                                  |
